# Supplementary material for: Sex-Specific Catabolic Metabolism Alterations in the Critically Ill following High Dose Vitamin D
Source: MDPI journal article supplement (doi:10.3390/metabo12030207), 2022-02-25
Supplement: s1 [file s1]

**Table S3. OPLS-DA model goodness of fit and predictive ability**

| Characteristic                    | OPLS-DA |      |         | Permutation ( <i>n</i> =200)     |                                  | CV-ANOVA |
|-----------------------------------|---------|------|---------|----------------------------------|----------------------------------|----------|
|                                   | R2X     | R2Y  | Q2      | R2 intercept<br>(x-axis, y-axis) | Q2 intercept<br>(x-axis, y-axis) | P-value  |
| 25(OH)D ≥ or < 7.5 ng/ml in women | 0.107   | 1.00 | -0.109  | 0.00, 0.229                      | 0.00, -0.153                     | 0.99     |
| 25(OH)D ≥ or < 7.5 ng/ml in men   | 0.112   | 1.00 | -0.0256 | 0.00, 0.132                      | 0.00, -0.128                     | 0.99     |
