# Supplementary material for: Sex-Specific Catabolic Metabolism Alterations in the Critically Ill following High Dose Vitamin D
Source: MDPI journal article supplement (doi:10.3390/metabo12030207), 2022-02-25
Supplement: s1 [file s1]

**Table S1. Pharmacokinetics of High Dose Vitamin D3**

| Parameter                              | Women             | Men               | P-value |
|----------------------------------------|-------------------|-------------------|---------|
| N                                      | 67                | 108               |         |
| Dose/kg body weight IU/kg Mean (SD)    | 7973 (1703)       | 7788 (1612)       | <0.001  |
| C0 ng/ml Mean (SD)                     | 12.47 (4.89)      | 12.79 (4.50)      | 0.66    |
| C3 ng/ml Mean (SD)                     | 32.63 (19.63)     | 33.78 (17.52)     | 0.69    |
| C7 ng/ml Mean (SD)                     | 35.78 (22.18)     | 35.50 (20.60)     | 0.93    |
| AUC0-7 (ng.h/ml)                       | 4850.67 (2714.36) | 4965.21 (2453.75) | 0.77    |
| AUCnorm (ng.h/ml)/(IU/kg) Median [IQR] | 0.57 [0.34, 0.80] | 0.67 [0.48, 0.99] | 0.034   |
