# Supplementary material for: Sex-Specific Catabolic Metabolism Alterations in the Critically Ill following High Dose Vitamin D
Source: Metabolites. 2022 Feb 25;12(3):207. doi: 10.3390/metabo12030207 (PMC8953844; doi:10.3390/metabo12030207)
Supplement: Supplementary file 1 [file metabolites-12-00207-s001.zip]

Archive with 12 entries (12 files):
- Data S1.xlsx
- Figure S1.pdf
- Figure S2.pdf
- Figure S3.pdf
- Methods S1.pdf
- Table S1.pdf
- Table S2.xlsx
- Table S3.pdf
- Table S4.xlsx
- Table S5.xlsx
- Table S6.xlsx
- Table S7.xlsx
