# Supplementary material for: Sex-Specific Catabolic Metabolism Alterations in the Critically Ill following High Dose Vitamin D
Source: Metabolites. 2022 Feb 25;12(3):207. doi: 10.3390/metabo12030207 (PMC8953844; doi:10.3390/metabo12030207)
Supplement: Supplementary file 1 [file metabolites-12-00207-s001.zip › Data S1.xlsx]

## Sheet: 983 Metabolites
Suplemental Data 1: Summary of all 983 metabolites identified
Biochemical	Retention time	Mass-to-charge ratio (m/z)	Super Pathway	Sub Pathway	Platform	Chemical Abstracts Service (CAS) Number	PUBCHEM	KEGG	HMDB
alanine	1700	90.055	Amino Acid	Alanine and Aspartate Metabolism	LC/MS Pos Early	56-41-7	5950	C00041	HMDB00161
asparagine	1225	133.061	Amino Acid	Alanine and Aspartate Metabolism	LC/MS Pos Early	70-47-3	6267	C00152	HMDB00168
aspartate	1165	134.045	Amino Acid	Alanine and Aspartate Metabolism	LC/MS Pos Early	56-84-8	5960	C00049	HMDB00191
hydroxyasparagine	1149	149.056	Amino Acid	Alanine and Aspartate Metabolism	LC/MS Pos Early		97663	C03124	HMDB32332
N-acetylalanine	1564.8	130.051	Amino Acid	Alanine and Aspartate Metabolism	LC/MS Polar	97-69-8	88064	C02847	HMDB00766
N-acetylaspartate (NAA)	620.5	174.041	Amino Acid	Alanine and Aspartate Metabolism	LC/MS Neg	997-55-7;997-55-7	65065	C01042	HMDB00812
creatine	1947	132.077	Amino Acid	Creatine Metabolism	LC/MS Pos Early	57-00-1	586	C00300	HMDB00064
creatinine	2055	114.066	Amino Acid	Creatine Metabolism	LC/MS Pos Early	60-27-5	588	C00791	HMDB00562
guanidinoacetate	2884	116.047	Amino Acid	Creatine Metabolism	LC/MS Polar	352-97-6	763	C00581	HMDB00128
4-hydroxyglutamate	1141	164.055	Amino Acid	Glutamate Metabolism	LC/MS Pos Early	2485-33-8	439902	C03079	HMDB01344
alpha-ketoglutaramate*	1916	144.03	Amino Acid	Glutamate Metabolism	LC/MS Polar	18465-19-5
beta-citrylglutamate	530	320.062	Amino Acid	Glutamate Metabolism	LC/MS Neg	73590-26-8	72715786	C20775
carboxyethyl-GABA	2085	176.092	Amino Acid	Glutamate Metabolism	LC/MS Pos Early	4386-03-02	2572		HMDB02201
citramalate	1224	166.071	Amino Acid	Glutamate Metabolism	LC/MS Pos Early	6236-10-08	1081	C00815	HMDB00426
glutamate	1500	148.06	Amino Acid	Glutamate Metabolism	LC/MS Pos Early	56-86-0	611	C00025	HMDB00148
glutamine	1291	147.076	Amino Acid	Glutamate Metabolism	LC/MS Pos Early	56-85-9	5961	C00064	HMDB00641
N-acetyl-aspartyl-glutamate (NAAG)	1035	305.098	Amino Acid	Glutamate Metabolism	LC/MS Pos Early	3106-85-2	5255	C12270	HMDB01067
N-acetylglutamate	3106	188.056	Amino Acid	Glutamate Metabolism	LC/MS Polar	5817-08-03	70914	C00624	HMDB01138
N-acetylglutamine	2140	187.072	Amino Acid	Glutamate Metabolism	LC/MS Polar	2490-97-3	182230	C02716	HMDB06029
N-methyl-GABA	2109	118.086	Amino Acid	Glutamate Metabolism	LC/MS Pos Early	1119-48-8	70703	C15987
pyroglutamine*	1900	129.066	Amino Acid	Glutamate Metabolism	LC/MS Pos Early	2353-44-8	134508
S-1-pyrroline-5-carboxylate	1528	114.055	Amino Acid	Glutamate Metabolism	LC/MS Pos Early	2906-39-0	1196	C04322	HMDB01301
2-aminobutyrate	2059	104.071	Amino Acid	Glutathione Metabolism	LC/MS Pos Early	1492-24-6	439691	C02261	HMDB00650
2-hydroxybutyrate/2-hydroxyisobutyrate	1258	103.04	Amino Acid	Glutathione Metabolism	LC/MS Polar
5-oxoproline	738.5	128.035	Amino Acid	Glutathione Metabolism	LC/MS Neg	98-79-3	7405	C01879	HMDB00267
cys-gly, oxidized	2947	355.074	Amino Acid	Glutathione Metabolism	LC/MS Pos Early	7729-20-6	333293
cysteine-glutathione disulfide	2465	427.095	Amino Acid	Glutathione Metabolism	LC/MS Pos Early	13081-14-6	4247235		HMDB00656
cysteinylglycine	2132	179.048	Amino Acid	Glutathione Metabolism	LC/MS Pos Early	19246-18-5	439498	C01419	HMDB00078
cysteinylglycine disulfide*	2547	298.053	Amino Acid	Glutathione Metabolism	LC/MS Pos Early	70555-24-7			HMDB00709
2-methylserine	1652	120.066	Amino Acid	Glycine, Serine and Threonine Metabolism	LC/MS Pos Early		94309	C02115
allo-threonine	2511.1	118.051	Amino Acid	Glycine, Serine and Threonine Metabolism	LC/MS Polar	28954-12-3	99289	C05519	HMDB04041
betaine	1064	118.086	Amino Acid	Glycine, Serine and Threonine Metabolism	LC/MS Pos Early	107-43-7	247	C00719	HMDB00043
dimethylglycine	1104	104.071	Amino Acid	Glycine, Serine and Threonine Metabolism	LC/MS Pos Early	1118-68-9	673	C01026	HMDB00092
glycine	1375	76.0393	Amino Acid	Glycine, Serine and Threonine Metabolism	LC/MS Pos Early	56-40-6	750	C00037	HMDB00123
N-acetylglycine	826	118.05	Amino Acid	Glycine, Serine and Threonine Metabolism	LC/MS Pos Early	543-24-8	10972		HMDB00532
N-acetylserine	2000	146.046	Amino Acid	Glycine, Serine and Threonine Metabolism	LC/MS Polar	97-14-3	65249		HMDB02931
N-acetylthreonine	821.6	160.062	Amino Acid	Glycine, Serine and Threonine Metabolism	LC/MS Neg	17093-74-2	152204
sarcosine	1280	90.055	Amino Acid	Glycine, Serine and Threonine Metabolism	LC/MS Pos Early	107-97-1	1088	C00213	HMDB00271
serine	1239	106.05	Amino Acid	Glycine, Serine and Threonine Metabolism	LC/MS Pos Early	56-45-1	5951	C00065	HMDB00187
threonine	1514	120.066	Amino Acid	Glycine, Serine and Threonine Metabolism	LC/MS Pos Early	72-19-5	6288	C00188	HMDB00167
1-methylguanidine	2149	74.0713	Amino Acid	Guanidino and Acetamido Metabolism	LC/MS Pos Early	22661-87-6	10111	C02294	HMDB01522
4-guanidinobutanoate	2320	146.092	Amino Acid	Guanidino and Acetamido Metabolism	LC/MS Pos Early	463-003;463-00-3	500	C01035	HMDB03464
guanidinosuccinate	1892	176.067	Amino Acid	Guanidino and Acetamido Metabolism	LC/MS Pos Early	6133-30-8	97856	C03139	HMDB03157
1-methyl-4-imidazoleacetate	2064	141.066	Amino Acid	Histidine Metabolism	LC/MS Pos Early	2625-49-2	75810	C05828	HMDB02820
1-methylhistidine	1227	168.078	Amino Acid	Histidine Metabolism	LC/MS Neg	332-80-9	92105	C01152	HMDB00001
1-ribosyl-imidazoleacetate*	2006	259.092	Amino Acid	Histidine Metabolism	LC/MS Pos Early	29605-99-0	5117448	C05131	HMDB02331
3-methylhistidine	906.3	168.078	Amino Acid	Histidine Metabolism	LC/MS Neg	368-16-1	64969	C01152	HMDB00479
cis-urocanate	2406	139.05	Amino Acid	Histidine Metabolism	LC/MS Pos Early	7699-35-6	1549103		HMDB34174
formiminoglutamate	1880	175.071	Amino Acid	Histidine Metabolism	LC/MS Pos Early	816-90-0	439233	C00439	HMDB00854
histidine	755.9	154.062	Amino Acid	Histidine Metabolism	LC/MS Neg	5934-29-2	6274	C00135	HMDB00177
hydantoin-5-propionic acid	2080	171.041	Amino Acid	Histidine Metabolism	LC/MS Polar	5624-26-0	782	C05565	HMDB01212
imidazole lactate	2040	157.061	Amino Acid	Histidine Metabolism	LC/MS Pos Early	14403-45-3	440129	C05568	HMDB02320
imidazole propionate	2263	141.066	Amino Acid	Histidine Metabolism	LC/MS Pos Early	1074-59-5	70630		HMDB02271
N-acetyl-1-methylhistidine*	2100	212.103	Amino Acid	Histidine Metabolism	LC/MS Pos Early		193270
N-acetyl-3-methylhistidine*	1360	210.088	Amino Acid	Histidine Metabolism	LC/MS Neg	37841-04-6	193270
N-acetylcarnosine	1235	267.11	Amino Acid	Histidine Metabolism	LC/MS Neg	56353-15-2	9903482		HMDB12881
N-acetylhistidine	2065	198.087	Amino Acid	Histidine Metabolism	LC/MS Pos Early	39145-52-3	75619	C02997	HMDB32055
trans-urocanate	2285	139.05	Amino Acid	Histidine Metabolism	LC/MS Pos Early	104-98-3	736715	C00785	HMDB00301
2,3-dihydroxy-2-methylbutyrate	787	133.051	Amino Acid	Leucine, Isoleucine and Valine Metabolism	LC/MS Neg	14868-24-7	301941		HMDB29576
2-hydroxy-3-methylvalerate	1800	131.071	Amino Acid	Leucine, Isoleucine and Valine Metabolism	LC/MS Neg	488-15-3	164623		HMDB00317
2-methylbutyroylcarnitine (C5)	3050	246.17	Amino Acid	Leucine, Isoleucine and Valine Metabolism	LC/MS Pos Early	31023-25-3	6426901		HMDB00378
3-hydroxy-2-ethylpropionate	975	117.056	Amino Acid	Leucine, Isoleucine and Valine Metabolism	LC/MS Neg	4374-62-3	188979		HMDB00396
3-hydroxyisobutyrate	1619	103.04	Amino Acid	Leucine, Isoleucine and Valine Metabolism	LC/MS Polar	2068-83-9	87	C06001	HMDB00336
3-methyl-2-oxobutyrate	1465	115.04	Amino Acid	Leucine, Isoleucine and Valine Metabolism	LC/MS Neg	3715-29-5	49	C00141	HMDB00019
3-methyl-2-oxovalerate	2064.2	129.056	Amino Acid	Leucine, Isoleucine and Valine Metabolism	LC/MS Neg	1460-34-0;51829-07-3	47	C00671	HMDB03736
3-methylglutaconate	2700	99.0452	Amino Acid	Leucine, Isoleucine and Valine Metabolism	LC/MS Polar	5746-90-7	1551553		HMDB00522
3-methylglutarylcarnitine (2)	2687	290.16	Amino Acid	Leucine, Isoleucine and Valine Metabolism	LC/MS Pos Early		128145		HMDB00552
4-methyl-2-oxopentanoate	2170	129.056	Amino Acid	Leucine, Isoleucine and Valine Metabolism	LC/MS Neg	816-66-0	70	C00233	HMDB00695
alpha-hydroxyisocaproate	1840	131.071	Amino Acid	Leucine, Isoleucine and Valine Metabolism	LC/MS Neg	10303-64-7	83697	C03264	HMDB00746
alpha-hydroxyisovalerate	1052	117.056	Amino Acid	Leucine, Isoleucine and Valine Metabolism	LC/MS Polar	600-37-3	99823		HMDB00407
beta-hydroxyisovalerate	1027	117.056	Amino Acid	Leucine, Isoleucine and Valine Metabolism	LC/MS Neg	625-08-1	69362		HMDB00754
ethylmalonate	2785	131.035	Amino Acid	Leucine, Isoleucine and Valine Metabolism	LC/MS Polar	601-75-2	11756		HMDB00622
isobutyrylcarnitine (C4)	2810	232.154	Amino Acid	Leucine, Isoleucine and Valine Metabolism	LC/MS Pos Early	25518-49-4	168379		HMDB00736
isobutyrylglycine (C4)	1420	144.067	Amino Acid	Leucine, Isoleucine and Valine Metabolism	LC/MS Neg	15926-18-8	10855600		HMDB00730
isoleucine	2800	132.102	Amino Acid	Leucine, Isoleucine and Valine Metabolism	LC/MS Pos Early	73-32-5	6306	C00407	HMDB00172
isovalerate (C5)	1564	101.061	Amino Acid	Leucine, Isoleucine and Valine Metabolism	LC/MS Neg	503-74-2	10430	C08262	HMDB00718
isovalerylcarnitine (C5)	3085	246.17	Amino Acid	Leucine, Isoleucine and Valine Metabolism	LC/MS Pos Early	31023-24-2	6426851		HMDB00688
isovalerylglycine	1950	158.082	Amino Acid	Leucine, Isoleucine and Valine Metabolism	LC/MS Neg	16284-60-9	546304		HMDB00678
leucine	2864	132.102	Amino Acid	Leucine, Isoleucine and Valine Metabolism	LC/MS Pos Early	61-90-5	5246661
methylsuccinate	2800	131.035	Amino Acid	Leucine, Isoleucine and Valine Metabolism	LC/MS Polar	498-21-5	10349		HMDB01844
N-acetylisoleucine	2325	172.098	Amino Acid	Leucine, Isoleucine and Valine Metabolism	LC/MS Neg	3077-46-1	2802421		HMDB61684
N-acetylleucine	2400	172.098	Amino Acid	Leucine, Isoleucine and Valine Metabolism	LC/MS Neg	1188-21-2	70912	C02710	HMDB11756
N-acetylvaline	1704	158.082	Amino Acid	Leucine, Isoleucine and Valine Metabolism	LC/MS Neg	96-81-1	66789		HMDB11757
tiglyl carnitine (C5)	2962	244.154	Amino Acid	Leucine, Isoleucine and Valine Metabolism	LC/MS Pos Early	64191-86-2	22833596		HMDB02366
valine	2479	118.086	Amino Acid	Leucine, Isoleucine and Valine Metabolism	LC/MS Pos Early	72-18-4	6287	C00183	HMDB00883
5-(galactosylhydroxy)-L-lysine	2755	325.161	Amino Acid	Lysine Metabolism	LC/MS Pos Early	32448-36-5
5-aminovalerate	2220	118.086	Amino Acid	Lysine Metabolism	LC/MS Pos Early	660-88-8	138	C00431	HMDB03355
5-hydroxylysine	2790	163.108	Amino Acid	Lysine Metabolism	LC/MS Pos Early	13204-98-3	1029	C16741	HMDB00450
6-oxopiperidine-2-carboxylate	965	142.051	Amino Acid	Lysine Metabolism	LC/MS Neg	34622-39-4	3014237		HMDB61705
glutaroylcarnitine (C5)	2393	276.144	Amino Acid	Lysine Metabolism	LC/MS Pos Early	102636-82-8	71464488		HMDB13130
lysine	2850	147.113	Amino Acid	Lysine Metabolism	LC/MS Pos Early	56-87-1	5962	C00047	HMDB00182
N,N,N-trimethyl-5-aminovalerate	2186	160.133	Amino Acid	Lysine Metabolism	LC/MS Pos Early
N2-acetyllysine	3372.6	187.109	Amino Acid	Lysine Metabolism	LC/MS Polar	1946-82-3	92907	C12989	HMDB00446
N6,N6,N6-trimethyllysine	2825	189.16	Amino Acid	Lysine Metabolism	LC/MS Pos Early	23284-33-5	440120	C03793	HMDB01325
N6-acetyllysine	1059	187.109	Amino Acid	Lysine Metabolism	LC/MS Neg	692-04-6	92832	C02727	HMDB00206
N-acetyl-cadaverine	2385	145.134	Amino Acid	Lysine Metabolism	LC/MS Pos Early	32343-73-0	189087		HMDB02284
pipecolate	2200	130.086	Amino Acid	Lysine Metabolism	LC/MS Pos Early	4043-87-2	849	C00408	HMDB00070
3-sulfo-L-alanine	2890	167.997	Amino Acid	Methionine, Cysteine, SAM and Taurine Metabolism	LC/MS Polar	498-40-8	72886	C00506	HMDB02757
5-methylthioribose	790	181.053	Amino Acid	Methionine, Cysteine, SAM and Taurine Metabolism	LC/MS Pos Early	23656-67-9	494		HMDB01087
alpha-ketobutyrate	940	101.024	Amino Acid	Methionine, Cysteine, SAM and Taurine Metabolism	LC/MS Polar	600-18-0	58	C00109	HMDB00005
cystathionine	2270	223.075	Amino Acid	Methionine, Cysteine, SAM and Taurine Metabolism	LC/MS Pos Early	535-34-2	439258	C02291	HMDB00099
cysteine	1488	122.027	Amino Acid	Methionine, Cysteine, SAM and Taurine Metabolism	LC/MS Pos Early	52-90-4;56-89-3	5862	C00097	HMDB00574
cysteine s-sulfate	565	201.984	Amino Acid	Methionine, Cysteine, SAM and Taurine Metabolism	LC/MS Pos Early	1637-71-4	115015	C05824	HMDB00731
cysteine sulfinic acid	597	154.017	Amino Acid	Methionine, Cysteine, SAM and Taurine Metabolism	LC/MS Pos Early	207121-48-0	109	C00606	HMDB00996
cystine	2000	241.031	Amino Acid	Methionine, Cysteine, SAM and Taurine Metabolism	LC/MS Pos Early	56-89-3	67678	C00491	HMDB00192
hypotaurine	724	110.027	Amino Acid	Methionine, Cysteine, SAM and Taurine Metabolism	LC/MS Pos Early	300-84-5	107812	C00519	HMDB00965
lanthionine	1730	209.059	Amino Acid	Methionine, Cysteine, SAM and Taurine Metabolism	LC/MS Pos Early	3183-08-02	98504
methionine	2526	150.058	Amino Acid	Methionine, Cysteine, SAM and Taurine Metabolism	LC/MS Pos Early	63-68-3	6137	C00073	HMDB00696
methionine sulfone	1250	182.048	Amino Acid	Methionine, Cysteine, SAM and Taurine Metabolism	LC/MS Pos Early	820-10-0	69961
methionine sulfoxide	1272	166.053	Amino Acid	Methionine, Cysteine, SAM and Taurine Metabolism	LC/MS Pos Early	3226-65-1	158980	C02989	HMDB02005
N-acetylmethionine	1787	190.054	Amino Acid	Methionine, Cysteine, SAM and Taurine Metabolism	LC/MS Neg	65-82-7	448580	C02712	HMDB11745
N-acetyltaurine	800	166.018	Amino Acid	Methionine, Cysteine, SAM and Taurine Metabolism	LC/MS Neg		159864
N-formylmethionine	1543.8	176.039	Amino Acid	Methionine, Cysteine, SAM and Taurine Metabolism	LC/MS Neg	4289-98-9	439750	C03145	HMDB01015
N-methyltaurine	1650	138.023	Amino Acid	Methionine, Cysteine, SAM and Taurine Metabolism	LC/MS Polar	107-68-6	7882
S-adenosylhomocysteine (SAH)	1832.4	383.114	Amino Acid	Methionine, Cysteine, SAM and Taurine Metabolism	LC/MS Neg	979-92-0	439155	C00021	HMDB00939
S-methylcysteine	880	134.028	Amino Acid	Methionine, Cysteine, SAM and Taurine Metabolism	LC/MS Neg	1187-84-4	24417		HMDB02108
S-methylcysteine sulfoxide	900	152.038	Amino Acid	Methionine, Cysteine, SAM and Taurine Metabolism	LC/MS Pos Early	6853-87-8	82142		HMDB29432
S-methylmethionine	2555	164.074	Amino Acid	Methionine, Cysteine, SAM and Taurine Metabolism	LC/MS Pos Early	3493-12-07	458	C05319	HMDB38670
taurine	660	126.022	Amino Acid	Methionine, Cysteine, SAM and Taurine Metabolism	LC/MS Pos Early	107-35-7	1123	C00245	HMDB00251
4-hydroxyphenylacetate	1361	151.04	Amino Acid	Phenylalanine Metabolism	LC/MS Neg	156-38-7	127	C00642	HMDB00020
N-acetylphenylalanine	2597	206.082	Amino Acid	Phenylalanine Metabolism	LC/MS Neg	2018-61-3	74839	C03519	HMDB00512
phenylacetate	2150	91.0554	Amino Acid	Phenylalanine Metabolism	LC/MS Neg	103-82-2	999	C07086	HMDB00209
phenylalanine	2878	166.086	Amino Acid	Phenylalanine Metabolism	LC/MS Pos Early	63-91-2	6140	C00079	HMDB00159
phenyllactate (PLA)	2208	165.056	Amino Acid	Phenylalanine Metabolism	LC/MS Neg	828-01-3	3848	C05607	HMDB00779
phenylpyruvate	2515	163.04	Amino Acid	Phenylalanine Metabolism	LC/MS Neg	156-06-9	997	C00166	HMDB00205
(N(1) + N(8))-acetylspermidine	3080	188.176	Amino Acid	Polyamine Metabolism	LC/MS Pos Early
4-acetamidobutanoate	1350	146.081	Amino Acid	Polyamine Metabolism	LC/MS Pos Early	3025-96-5	18189	C02946	HMDB03681
5-methylthioadenosine (MTA)	2752	298.097	Amino Acid	Polyamine Metabolism	LC/MS Pos Early	2457-80-9	439176	C00170	HMDB01173
acisoga	2297	183.114	Amino Acid	Polyamine Metabolism	LC/MS Neg	106692-36-8	129397
N1,N12-diacetylspermine	3105	287.244	Amino Acid	Polyamine Metabolism	LC/MS Pos Early	61345-83-3	132680	C03413	HMDB02172
N-acetyl-isoputreanine*	2305	203.139	Amino Acid	Polyamine Metabolism	LC/MS Pos Early
N-acetylputrescine	2230	131.118	Amino Acid	Polyamine Metabolism	LC/MS Pos Early	18233-70-0	122356	C02714	HMDB02064
spermidine	3355	146.165	Amino Acid	Polyamine Metabolism	LC/MS Pos Early	124-20-9	1102	C00315	HMDB01257
3-indoxyl sulfate	2222.2	212.002	Amino Acid	Tryptophan Metabolism	LC/MS Neg	2642-37-7	10258		HMDB00682
C-glycosyltryptophan	1777	365.135	Amino Acid	Tryptophan Metabolism	LC/MS Neg	180509-18-6	10981970
indole-3-carboxylate	1710	160.04	Amino Acid	Tryptophan Metabolism	LC/MS Neg	771-50-6	69867	C19837	HMDB03320
indoleacetate	2200	174.056	Amino Acid	Tryptophan Metabolism	LC/MS Neg	6505-45-9	802	C00954	HMDB00197
indoleacetylglutamine	2535	302.115	Amino Acid	Tryptophan Metabolism	LC/MS Neg		25200879		HMDB13240
indolelactate	2286	204.067	Amino Acid	Tryptophan Metabolism	LC/MS Neg	832-97-3	92904	C02043	HMDB00671
indolepropionate	2795	188.072	Amino Acid	Tryptophan Metabolism	LC/MS Neg	830-96-6	3744		HMDB02302
kynurenate	2224	188.035	Amino Acid	Tryptophan Metabolism	LC/MS Neg	492-27-3	3845	C01717	HMDB00715
kynurenine	2739	209.092	Amino Acid	Tryptophan Metabolism	LC/MS Pos Early	2922-83-0	161166	C00328	HMDB00684
N-acetylkynurenine (2)	2378	249.088	Amino Acid	Tryptophan Metabolism	LC/MS Neg
N-acetyltryptophan	2630	245.093	Amino Acid	Tryptophan Metabolism	LC/MS Neg	1218-34-4	700653	C03137	HMDB13713
N-formylanthranilic acid	2150	164.035	Amino Acid	Tryptophan Metabolism	LC/MS Neg	3342-77-6	101399	C05653	HMDB04089
picolinate	910	124.039	Amino Acid	Tryptophan Metabolism	LC/MS Pos Early	98-98-6	1018	C10164	HMDB02243
serotonin	2550	177.102	Amino Acid	Tryptophan Metabolism	LC/MS Pos Early	153-98-0	5202	C00780	HMDB00259
tryptophan	2986	205.097	Amino Acid	Tryptophan Metabolism	LC/MS Pos Early	73-22-3	6305	C00078	HMDB00929
tryptophan betaine	2673	247.144	Amino Acid	Tryptophan Metabolism	LC/MS Pos Early	20671-76-5	442106	C09213	HMDB61115
xanthurenate	1476	204.03	Amino Acid	Tryptophan Metabolism	LC/MS Neg	59-007	5699	C02470	HMDB00881
2-hydroxyphenylacetate	858.6	151.04	Amino Acid	Tyrosine Metabolism	LC/MS Polar	614-75-5	11970	C05852	HMDB00669
3-(4-hydroxyphenyl)lactate (HPLA)	1379	181.051	Amino Acid	Tyrosine Metabolism	LC/MS Neg	6482-98-0	9378	C03672	HMDB00755
3,4-dihydroxyphenylacetate sulfate	800	246.992	Amino Acid	Tyrosine Metabolism	LC/MS Neg	38339-04-7	193283
3-hydroxyphenylacetate sulfate	969	230.997	Amino Acid	Tyrosine Metabolism	LC/MS Neg
3-methoxytyramine sulfate	1722	246.044	Amino Acid	Tyrosine Metabolism	LC/MS Neg
3-methoxytyrosine	2555	212.092	Amino Acid	Tyrosine Metabolism	LC/MS Pos Early	300-48-1	1670		HMDB01434
4-hydroxyphenylacetatoylcarnitine	2730	296.149	Amino Acid	Tyrosine Metabolism	LC/MS Pos Early
4-hydroxyphenylpyruvate	1690	179.035	Amino Acid	Tyrosine Metabolism	LC/MS Neg	156-39-8	979	C01179	HMDB00707
4-methoxyphenol sulfate	2412	203.002	Amino Acid	Tyrosine Metabolism	LC/MS Neg	3233-60-1
5-hydroxymethyl-2-furoic acid	962	141.019	Amino Acid	Tyrosine Metabolism	LC/MS Neg	6338-41-6	80642	C20448	HMDB02432
dopamine 3-O-sulfate	1556.2	232.028	Amino Acid	Tyrosine Metabolism	LC/MS Neg		122136	C13690	HMDB06275
dopamine 4-sulfate	1511	232.028	Amino Acid	Tyrosine Metabolism	LC/MS Neg		123932	C13691	HMDB04148
gentisate	905	153.019	Amino Acid	Tyrosine Metabolism	LC/MS Polar	490-79-9	3469	C00628	HMDB00152
homovanillate (HVA)	1649	181.051	Amino Acid	Tyrosine Metabolism	LC/MS Neg	306-08-1	1738	C05582	HMDB00118
homovanillate sulfate	1047	261.007	Amino Acid	Tyrosine Metabolism	LC/MS Neg	38339-06-9	29981063		HMDB11719
indoxyl glucuronide	1940	308.078	Amino Acid	Tyrosine Metabolism	LC/MS Neg	35804-66-1	2733785		HMDB59804
N-acetyltyrosine	1680	222.077	Amino Acid	Tyrosine Metabolism	LC/MS Neg	537-55-3	68310		HMDB00866
N-formylphenylalanine	2360	192.067	Amino Acid	Tyrosine Metabolism	LC/MS Neg	13200-85-6	759256
p-cresol glucuronide*	2420	283.082	Amino Acid	Tyrosine Metabolism	LC/MS Neg	17680-99-8	154035		HMDB11686
phenol glucuronide	1800	269.067	Amino Acid	Tyrosine Metabolism	LC/MS Neg	17685-05-1	87235		HMDB60014
phenol sulfate	2156	172.991	Amino Acid	Tyrosine Metabolism	LC/MS Neg	937-34-8	74426	C02180	HMDB60015
thyroxine	4808	775.679	Amino Acid	Tyrosine Metabolism	LC/MS Neg	51-48-9	5819	C01829	HMDB01918
tyramine O-sulfate	1565	216.034	Amino Acid	Tyrosine Metabolism	LC/MS Neg	30223-92-8	153005		HMDB06409
tyrosine	2430	182.081	Amino Acid	Tyrosine Metabolism	LC/MS Pos Early	60-18-4	6057	C00082	HMDB00158
vanillactate	1625	211.061	Amino Acid	Tyrosine Metabolism	LC/MS Neg	2475-56-1	160637		HMDB00913
vanillic alcohol sulfate	1808	233.013	Amino Acid	Tyrosine Metabolism	LC/MS Neg	754920-02-0
vanillylmandelate (VMA)	941	197.046	Amino Acid	Tyrosine Metabolism	LC/MS Neg	55-10-7	1245	C05584	HMDB00291
2-oxoarginine*	1760	174.087	Amino Acid	Urea cycle; Arginine and Proline Metabolism	LC/MS Pos Early	3715-10-04	558	C03771	HMDB04225
3-hydroxyproline	1243	132.066	Amino Acid	Urea cycle; Arginine and Proline Metabolism	LC/MS Pos Early	4298-05-9;4298-08-2	559314	C05147	HMDB02113
argininate*	2150	176.103	Amino Acid	Urea cycle; Arginine and Proline Metabolism	LC/MS Pos Early	157-07-3	160437		HMDB03148
arginine	2825	175.119	Amino Acid	Urea cycle; Arginine and Proline Metabolism	LC/MS Pos Early	1119-34-2	232	C00062	HMDB00517
citrulline	1520	176.103	Amino Acid	Urea cycle; Arginine and Proline Metabolism	LC/MS Pos Early	372-75-8	9750	C00327	HMDB00904
dimethylarginine (ADMA + SDMA)	2850	203.15	Amino Acid	Urea cycle; Arginine and Proline Metabolism	LC/MS Pos Early	102783-24-4	123831	C03626	HMDB01539
homoarginine	2882	189.135	Amino Acid	Urea cycle; Arginine and Proline Metabolism	LC/MS Pos Early	156-86-5	9085	C01924	HMDB00670
homocitrulline	3006.8	188.104	Amino Acid	Urea cycle; Arginine and Proline Metabolism	LC/MS Polar	1190-49-4	65072	C02427	HMDB00679
hydroxyproline	1064	132.066	Amino Acid	Urea cycle; Arginine and Proline Metabolism	LC/MS Pos Early	51-35-4	5810	C01157	HMDB00725
N2,N5-diacetylornithine	1367	215.104	Amino Acid	Urea cycle; Arginine and Proline Metabolism	LC/MS Neg	39825-23-5	10398396
N-acetylarginine	2245	217.13	Amino Acid	Urea cycle; Arginine and Proline Metabolism	LC/MS Pos Early	155-84-0	67427	C02562	HMDB04620
N-acetylcitrulline	940	216.099	Amino Acid	Urea cycle; Arginine and Proline Metabolism	LC/MS Neg	33965-42-3	656979	C15532	HMDB00856
N-acetylproline	1695	158.081	Amino Acid	Urea cycle; Arginine and Proline Metabolism	LC/MS Pos Early	1074-79-9	322640
N-delta-acetylornithine	858	173.093	Amino Acid	Urea cycle; Arginine and Proline Metabolism	LC/MS Neg		9920500
N-methylhydroxyproline	1145	146.081	Amino Acid	Urea cycle; Arginine and Proline Metabolism	LC/MS Pos Early
N-methylproline	1335	130.086	Amino Acid	Urea cycle; Arginine and Proline Metabolism	LC/MS Pos Early	475-11-6	557
ornithine	2800	133.097	Amino Acid	Urea cycle; Arginine and Proline Metabolism	LC/MS Pos Early	3184-13-2	6262	C00077	HMDB03374
proline	1603	116.071	Amino Acid	Urea cycle; Arginine and Proline Metabolism	LC/MS Pos Early	147-85-3	145742	C00148	HMDB00162
prolylhydroxyproline	2128	229.118	Amino Acid	Urea cycle; Arginine and Proline Metabolism	LC/MS Pos Early	18684-24-7	11673055		HMDB06695
urea	700	121.072	Amino Acid	Urea cycle; Arginine and Proline Metabolism	LC/MS Pos Early	57-13-6	1176	C00086	HMDB00294
N6-carboxymethyllysine	2500	205.118	Carbohydrate	Advanced Glycation End-product	LC/MS Pos Early	5746-04-03	123800
erythronate*	2186	135.03	Carbohydrate	Aminosugar Metabolism	LC/MS Polar	88759-55-1	2781043		HMDB00613
glucuronate	3233.3	193.035	Carbohydrate	Aminosugar Metabolism	LC/MS Polar	207300-70-7	444791	C00191	HMDB00127
N-acetylglucosamine/N-acetylgalactosamine	715	222.097	Carbohydrate	Aminosugar Metabolism	LC/MS Pos Early		24139		HMDB00215
N-acetylglucosaminylasparagine	1212	336.14	Carbohydrate	Aminosugar Metabolism	LC/MS Pos Early	2776-93-4	123826	C04540	HMDB00489
N-acetylneuraminate	660	310.113	Carbohydrate	Aminosugar Metabolism	LC/MS Pos Early	131-48-6	439197	C00270	HMDB00230
sucrose	865	341.109	Carbohydrate	Disaccharides and Oligosaccharides	LC/MS Neg	57-50-1	5988	C00089	HMDB00258
fructose	2065	225.062	Carbohydrate	Fructose, Mannose and Galactose Metabolism	LC/MS Polar	57-48-7	5984	C00095	HMDB00660
galactonate	3085	195.051	Carbohydrate	Fructose, Mannose and Galactose Metabolism	LC/MS Polar	299-28-5	128869	C00880	HMDB00565
mannitol/sorbitol	2320	181.072	Carbohydrate	Fructose, Mannose and Galactose Metabolism	LC/MS Polar		5780	C00794	HMDB00247
mannose	2200	225.062	Carbohydrate	Fructose, Mannose and Galactose Metabolism	LC/MS Polar	3458-28-4	18950	C00159	HMDB00169
maltose	3329.4	387.114	Carbohydrate	Glycogen Metabolism	LC/MS Polar	6363-53-7	10991489	C00208	HMDB00163
maltotetraose	910	665.215	Carbohydrate	Glycogen Metabolism	LC/MS Neg	34612-38-9	446495	C02052	HMDB01296
maltotriose	812	503.162	Carbohydrate	Glycogen Metabolism	LC/MS Neg	1109-28-0	439586	C01835	HMDB01262
1,5-anhydroglucitol (1,5-AG)	802	163.061	Carbohydrate	Glycolysis, Gluconeogenesis, and Pyruvate Metabolism	LC/MS Neg	154-58-5	64960	C07326	HMDB02712
2,3-diphosphoglycerate	555	264.952	Carbohydrate	Glycolysis, Gluconeogenesis, and Pyruvate Metabolism	LC/MS Neg	102783-53-9	186004	C01159	HMDB01294
3-phosphoglycerate	590	187	Carbohydrate	Glycolysis, Gluconeogenesis, and Pyruvate Metabolism	LC/MS Pos Early	80731-10-8	724	C00597	HMDB00807
glucose	2342	225.062	Carbohydrate	Glycolysis, Gluconeogenesis, and Pyruvate Metabolism	LC/MS Polar	50-99-7	79025	C00031	HMDB00122
glycerate	2070.4	105.019	Carbohydrate	Glycolysis, Gluconeogenesis, and Pyruvate Metabolism	LC/MS Polar	600-19-1	752	C00258	HMDB00139
lactate	1468.8	89.0244	Carbohydrate	Glycolysis, Gluconeogenesis, and Pyruvate Metabolism	LC/MS Polar	79-33-4	612	C00186	HMDB00190
pyruvate	1083	87.0088	Carbohydrate	Glycolysis, Gluconeogenesis, and Pyruvate Metabolism	LC/MS Polar	127-17-3	1060	C00022	HMDB00243
arabinose	1804.5	195.051	Carbohydrate	Pentose Metabolism	LC/MS Polar	28697-53-2	66308	C00216	HMDB00646
arabitol/xylitol	1932.4	151.061	Carbohydrate	Pentose Metabolism	LC/MS Polar		6912	C01904
arabonate/xylonate	2700	165.04	Carbohydrate	Pentose Metabolism	LC/MS Polar
ribitol	1789.6	151.061	Carbohydrate	Pentose Metabolism	LC/MS Polar	488-81-3	6912	C00474	HMDB00508
ribonate (ribonolactone)	2425	165.04	Carbohydrate	Pentose Metabolism	LC/MS Polar	5336-08-03	5460677	C01685	HMDB00867
ribulonate/xylulonate*	2350	165.04	Carbohydrate	Pentose Metabolism	LC/MS Polar
sedoheptulose	2255	209.067	Carbohydrate	Pentose Metabolism	LC/MS Polar	3019-74-7	5459879		HMDB03219
xylose	1727	195.051	Carbohydrate	Pentose Metabolism	LC/MS Polar	609-06-3	135191	C00181	HMDB00098
gulonate*	2750	195.051	Cofactors and Vitamins	Ascorbate and Aldarate Metabolism	LC/MS Polar	20246-53-1	9794176	C00257	HMDB03290
oxalate (ethanedioate)	603	88.988	Cofactors and Vitamins	Ascorbate and Aldarate Metabolism	LC/MS Neg	144-62-7	971	C00209	HMDB02329
threonate	2384	135.03	Cofactors and Vitamins	Ascorbate and Aldarate Metabolism	LC/MS Polar	70753-61-6	151152	C01620	HMDB00943
bilirubin	1840	585.271	Cofactors and Vitamins	Hemoglobin and Porphyrin Metabolism	LC/MS Pos Late	635-65-4	5280352	C00486	HMDB00054
bilirubin (E,E)*	1045	585.271	Cofactors and Vitamins	Hemoglobin and Porphyrin Metabolism	LC/MS Pos Late	114-25-0	5315454
bilirubin (E,Z or Z,E)*	1265	585.271	Cofactors and Vitamins	Hemoglobin and Porphyrin Metabolism	LC/MS Pos Late		5799469		HMDB00488
biliverdin	1016	583.255	Cofactors and Vitamins	Hemoglobin and Porphyrin Metabolism	LC/MS Pos Late	55482-27-4;55482-27-4	5353439	C00500	HMDB01008
D-urobilin	935	589.302	Cofactors and Vitamins	Hemoglobin and Porphyrin Metabolism	LC/MS Pos Late	3947-38-4	6276321	C05795	HMDB04161
heme	1124	616.176	Cofactors and Vitamins	Hemoglobin and Porphyrin Metabolism	LC/MS Pos Late	14875-96-8	26945	C00032	HMDB03178
I-urobilinogen	4190	591.319	Cofactors and Vitamins	Hemoglobin and Porphyrin Metabolism	LC/MS Neg	14684-37-8	26818	C05790	HMDB04157
L-urobilin	901	595.349	Cofactors and Vitamins	Hemoglobin and Porphyrin Metabolism	LC/MS Pos Late	34217-90-8	5280818	C05793	HMDB04159
1-methylnicotinamide	1940	137.071	Cofactors and Vitamins	Nicotinate and Nicotinamide Metabolism	LC/MS Pos Early	1005-24-9	10129985	C02918	HMDB00699
N1-Methyl-2-pyridone-5-carboxamide	1668	151.051	Cofactors and Vitamins	Nicotinate and Nicotinamide Metabolism	LC/MS Neg	701-44-0	69698	C05842	HMDB04193
nicotinamide	1942	123.055	Cofactors and Vitamins	Nicotinate and Nicotinamide Metabolism	LC/MS Pos Early	98-92-0	936	C00153	HMDB01406
nicotinamide riboside	2040	255.098	Cofactors and Vitamins	Nicotinate and Nicotinamide Metabolism	LC/MS Pos Early	1341-23-7	439924	C03150	HMDB00855
quinolinate	845	168.029	Cofactors and Vitamins	Nicotinate and Nicotinamide Metabolism	LC/MS Pos Early	89-00-9	1066	C03722	HMDB00232
trigonelline (N'-methylnicotinate)	1388	138.055	Cofactors and Vitamins	Nicotinate and Nicotinamide Metabolism	LC/MS Pos Early	535-83-1	5570	C01004	HMDB00875
pantothenate (Vitamin B5)	1498.7	218.103	Cofactors and Vitamins	Pantothenate and CoA Metabolism	LC/MS Neg	137-08-6	6613	C00864	HMDB00210
riboflavin (Vitamin B2)	3160	255.089	Cofactors and Vitamins	Riboflavin Metabolism	LC/MS Neg	83-88-5	493570	C00255	HMDB00244
thiamin (Vitamin B1)	3050	265.112	Cofactors and Vitamins	Thiamine Metabolism	LC/MS Pos Early	59-43-8	1130	C00378	HMDB00235
alpha-CEHC glucuronide*	2616	453.177	Cofactors and Vitamins	Tocopherol Metabolism	LC/MS Neg	477200-36-5
alpha-CEHC sulfate	3090	357.101	Cofactors and Vitamins	Tocopherol Metabolism	LC/MS Neg
alpha-tocopherol	2522	430.378	Cofactors and Vitamins	Tocopherol Metabolism	LC/MS Pos Late	59-02-9;10191-41-0	14985	C02477	HMDB01893
delta-CEHC glucuronide*	2116	425.145	Cofactors and Vitamins	Tocopherol Metabolism	LC/MS Neg
gamma-CEHC	3843	263.129	Cofactors and Vitamins	Tocopherol Metabolism	LC/MS Neg	178167-75-4	133098		HMDB01931
gamma-CEHC glucuronide*	2500	439.161	Cofactors and Vitamins	Tocopherol Metabolism	LC/MS Neg
gamma-CEHC sulfate*	2909	343.086	Cofactors and Vitamins	Tocopherol Metabolism	LC/MS Neg
gamma-tocopherol/beta-tocopherol	2384	416.364	Cofactors and Vitamins	Tocopherol Metabolism	LC/MS Pos Late
beta-cryptoxanthin	2560	552.433	Cofactors and Vitamins	Vitamin A Metabolism	LC/MS Pos Late	472-70-8	6384256		HMDB33844
carotene diol (1)	1720	568.428	Cofactors and Vitamins	Vitamin A Metabolism	LC/MS Pos Late
carotene diol (2)	1904	568.428	Cofactors and Vitamins	Vitamin A Metabolism	LC/MS Pos Late
carotene diol (3)	1948	568.428	Cofactors and Vitamins	Vitamin A Metabolism	LC/MS Pos Late
retinol (Vitamin A)	1636	269.226	Cofactors and Vitamins	Vitamin A Metabolism	LC/MS Pos Late	68-26-8	445354	C00473	HMDB00305
pyridoxal	2343	168.066	Cofactors and Vitamins	Vitamin B6 Metabolism	LC/MS Pos Early	65-22-5	1050	C00250	HMDB01545
pyridoxate	2185	182.046	Cofactors and Vitamins	Vitamin B6 Metabolism	LC/MS Neg	82-82-6	6723	C00847	HMDB00017
pyridoxine (Vitamin B6)	2442	170.081	Cofactors and Vitamins	Vitamin B6 Metabolism	LC/MS Pos Early	58-56-0	1054	C00314	HMDB02075
phosphate	576	98.9842	Energy	Oxidative Phosphorylation	LC/MS Pos Early	7664-38-2	1061	C00009	HMDB01429
2-methylcitrate/homocitrate	575	205.035	Energy	TCA Cycle	LC/MS Neg
aconitate [cis or trans]	580	173.009	Energy	TCA Cycle	LC/MS Neg
alpha-ketoglutarate	2700	145.014	Energy	TCA Cycle	LC/MS Polar	305-72-6;328-50-7;22202-68-2	51	C00026	HMDB00208
citrate	582	191.02	Energy	TCA Cycle	LC/MS Neg	77-92-9	311	C00158	HMDB00094
fumarate	3084	115.004	Energy	TCA Cycle	LC/MS Polar	100-17-8	444972	C00122	HMDB00134
malate	615.6	133.014	Energy	TCA Cycle	LC/MS Neg	6915-15-7	525	C00149	HMDB00156
succinate	3149	117.019	Energy	TCA Cycle	LC/MS Polar	110-15-6	1110	C00042	HMDB00254
succinylcarnitine (C4)	2291	262.129	Energy	TCA Cycle	LC/MS Pos Early	256928-74-2	71464481		HMDB61717
11-ketoetiocholanolone glucuronide	4280	479.229	Lipid	Androgenic Steroids	LC/MS Neg	17181-16-7				0
16a-hydroxy DHEA 3-sulfate	4240	383.153	Lipid	Androgenic Steroids	LC/MS Neg
5alpha-androstan-3alpha,17alpha-diol disulfate	4547	225.07	Lipid	Androgenic Steroids	LC/MS Neg
5alpha-androstan-3alpha,17beta-diol disulfate	4275	225.07	Lipid	Androgenic Steroids	LC/MS Neg
5alpha-androstan-3alpha,17beta-diol monosulfate (1)	4925	371.19	Lipid	Androgenic Steroids	LC/MS Neg
5alpha-androstan-3alpha,17beta-diol monosulfate (2)	5080	371.19	Lipid	Androgenic Steroids	LC/MS Neg
5alpha-androstan-3beta,17alpha-diol disulfate	4215	225.07	Lipid	Androgenic Steroids	LC/MS Neg
5alpha-androstan-3beta,17beta-diol disulfate	3880	225.07	Lipid	Androgenic Steroids	LC/MS Neg	571-20-0	242332	C12525	HMDB00493
5alpha-androstan-3beta,17beta-diol monosulfate (2)	4685	371.19	Lipid	Androgenic Steroids	LC/MS Neg
andro steroid monosulfate C19H28O6S (1)*	3871	383.153	Lipid	Androgenic Steroids	LC/MS Neg			C04555	HMDB02759
androstenediol (3alpha, 17alpha) monosulfate (2)	4712	369.174	Lipid	Androgenic Steroids	LC/MS Neg
androstenediol (3alpha, 17alpha) monosulfate (3)	5180	369.174	Lipid	Androgenic Steroids	LC/MS Neg
androstenediol (3beta,17beta) disulfate (1)	3740	224.062	Lipid	Androgenic Steroids	LC/MS Neg		87120982	C04295	HMDB03818
androstenediol (3beta,17beta) disulfate (2)	4065	224.062	Lipid	Androgenic Steroids	LC/MS Neg		87120982	C04295	HMDB03818
androstenediol (3beta,17beta) monosulfate (1)	4535	369.174	Lipid	Androgenic Steroids	LC/MS Neg	521-17-5	13847309		HMDB03818
androstenediol (3beta,17beta) monosulfate (2)	4500	369.174	Lipid	Androgenic Steroids	LC/MS Neg
androsterone glucuronide	4953	465.249	Lipid	Androgenic Steroids	LC/MS Neg	1852-43-3	114833	C11135	HMDB02829
androsterone sulfate	5022	369.174	Lipid	Androgenic Steroids	LC/MS Neg	2479-86-9	159663		HMDB02759
dehydroisoandrosterone sulfate (DHEA-S)	4745	367.158	Lipid	Androgenic Steroids	LC/MS Neg	651-48-9	12594	C04555	HMDB01032
epiandrosterone sulfate	4855	369.174	Lipid	Androgenic Steroids	LC/MS Neg	22229-22-7	9929317
etiocholanolone glucuronide	4915	465.249	Lipid	Androgenic Steroids	LC/MS Neg	3602-09-03	270605		HMDB04484
carnitine	1978	162.112	Lipid	Carnitine Metabolism	LC/MS Pos Early	461-05-2	10917	C00318	HMDB00062
deoxycarnitine	2052	146.118	Lipid	Carnitine Metabolism	LC/MS Pos Early	6249-56-5	134	C01181	HMDB01161
ceramide (d16:1/24:1, d18:1/22:1)*	3850	620.598	Lipid	Ceramides	LC/MS Pos Late
ceramide (d18:1/14:0, d16:1/16:0)*	2477	510.488	Lipid	Ceramides	LC/MS Pos Late
ceramide (d18:1/17:0, d17:1/18:0)*	3055	552.535	Lipid	Ceramides	LC/MS Pos Late
ceramide (d18:1/20:0, d16:1/22:0, d20:1/18:0)*	3920	594.582	Lipid	Ceramides	LC/MS Pos Late
ceramide (d18:2/24:1, d18:1/24:2)*	3858	646.613	Lipid	Ceramides	LC/MS Pos Late
N-behenoyl-sphingadienine (d18:2/22:0)*	3911	620.598	Lipid	Ceramides	LC/MS Pos Late
N-palmitoyl-heptadecasphingosine (d17:1/16:0)*	2645	524.504	Lipid	Ceramides	LC/MS Pos Late
N-palmitoyl-sphingadienine (d18:2/16:0)*	2490	536.504	Lipid	Ceramides	LC/MS Pos Late
N-palmitoyl-sphingosine (d18:1/16:0)	2893	538.519	Lipid	Ceramides	LC/MS Pos Late	24696-26-2	5283564		HMDB04949
N-stearoyl-sphingadienine (d18:2/18:0)*	2846	564.535	Lipid	Ceramides	LC/MS Pos Late
N-stearoyl-sphingosine (d18:1/18:0)*	3392	566.551	Lipid	Ceramides	LC/MS Pos Late	104404-17-3	5283565		HMDB04950
cortisol	4710	361.202	Lipid	Corticosteroids	LC/MS Neg	50-23-7	5754	C00735	HMDB00063
cortisol 21-glucuronide	4246.5	537.234	Lipid	Corticosteroids	LC/MS Neg
cortisone	4575	359.186	Lipid	Corticosteroids	LC/MS Neg	53-06-5	222786	C00762	HMDB02802
diacylglycerol (14:0/18:1, 16:0/16:1) [1]*	3057	584.525	Lipid	Diacylglycerol	LC/MS Pos Late
diacylglycerol (14:0/18:1, 16:0/16:1) [2]*	3183	584.525	Lipid	Diacylglycerol	LC/MS Pos Late
diacylglycerol (16:1/18:2 [2], 16:0/18:3 [1])*	2733	608.525	Lipid	Diacylglycerol	LC/MS Pos Late
linoleoyl-arachidonoyl-glycerol (18:2/20:4) [1]*	2590	658.541	Lipid	Diacylglycerol	LC/MS Pos Late				HMDB07257
linoleoyl-arachidonoyl-glycerol (18:2/20:4) [2]*	2650	658.541	Lipid	Diacylglycerol	LC/MS Pos Late				HMDB07257
linoleoyl-linolenoyl-glycerol (18:2/18:3) [2]*	2478	632.525	Lipid	Diacylglycerol	LC/MS Pos Late				HMDB07250
linoleoyl-linoleoyl-glycerol (18:2/18:2) [1]*	2720	634.541	Lipid	Diacylglycerol	LC/MS Pos Late				HMDB07248
oleoyl-arachidonoyl-glycerol (18:1/20:4) [1]*	2907	660.556	Lipid	Diacylglycerol	LC/MS Pos Late				HMDB07228
oleoyl-arachidonoyl-glycerol (18:1/20:4) [2]*	2990	660.556	Lipid	Diacylglycerol	LC/MS Pos Late				HMDB07228
oleoyl-linolenoyl-glycerol (18:1/18:3) [2]*	2819	634.541	Lipid	Diacylglycerol	LC/MS Pos Late				HMDB07220
oleoyl-linoleoyl-glycerol (18:1/18:2) [1]	3115	636.556	Lipid	Diacylglycerol	LC/MS Pos Late	106292-55-1			HMDB07219
oleoyl-linoleoyl-glycerol (18:1/18:2) [2]	3223	636.556	Lipid	Diacylglycerol	LC/MS Pos Late	104346-53-4			HMDB07219
oleoyl-oleoyl-glycerol (18:1/18:1) [1]*	3571	638.572	Lipid	Diacylglycerol	LC/MS Pos Late				HMDB07218
oleoyl-oleoyl-glycerol (18:1/18:1) [2]*	3695	638.572	Lipid	Diacylglycerol	LC/MS Pos Late				HMDB07218
palmitoleoyl-arachidonoyl-glycerol (16:1/20:4) [2]*	2528	632.525	Lipid	Diacylglycerol	LC/MS Pos Late
palmitoleoyl-linoleoyl-glycerol (16:1/18:2) [1]*	2664	608.525	Lipid	Diacylglycerol	LC/MS Pos Late				HMDB07132
palmitoyl-arachidonoyl-glycerol (16:0/20:4) [1]*	2916	634.541	Lipid	Diacylglycerol	LC/MS Pos Late				HMDB07112
palmitoyl-arachidonoyl-glycerol (16:0/20:4) [2]*	3015	634.541	Lipid	Diacylglycerol	LC/MS Pos Late				HMDB07112
palmitoyl-linoleoyl-glycerol (16:0/18:2) [1]*	3080	610.541	Lipid	Diacylglycerol	LC/MS Pos Late		9543695		HMDB07103
palmitoyl-linoleoyl-glycerol (16:0/18:2) [2]*	3197	610.541	Lipid	Diacylglycerol	LC/MS Pos Late				HMDB07103
palmitoyl-oleoyl-glycerol (16:0/18:1) [1]*	3562	612.556	Lipid	Diacylglycerol	LC/MS Pos Late			C13861	HMDB07102
palmitoyl-oleoyl-glycerol (16:0/18:1) [2]*	3695	612.556	Lipid	Diacylglycerol	LC/MS Pos Late			C13861	HMDB07102
palmitoyl-palmitoyl-glycerol (16:0/16:0) [2]*	3734	586.541	Lipid	Diacylglycerol	LC/MS Pos Late				HMDB07098
stearoyl-arachidonoyl-glycerol (18:0/20:4) [1]*	3404	662.572	Lipid	Diacylglycerol	LC/MS Pos Late
stearoyl-arachidonoyl-glycerol (18:0/20:4) [2]*	3522	662.572	Lipid	Diacylglycerol	LC/MS Pos Late
N-palmitoyl-sphinganine (d18:0/16:0)	3090	540.535	Lipid	Dihydroceramides	LC/MS Pos Late	5966-29-0	5283572		HMDB11760
N-stearoyl-sphinganine (d18:0/18:0)*	3526	568.566	Lipid	Dihydroceramides	LC/MS Pos Late	2304-80-5	5283573
behenoyl dihydrosphingomyelin (d18:0/22:0)*	3150	789.684	Lipid	Dihydrosphingomyelins	LC/MS Pos Late				HMDB12091
myristoyl dihydrosphingomyelin (d18:0/14:0)*	2060	677.559	Lipid	Dihydrosphingomyelins	LC/MS Pos Late				HMDB12085
palmitoyl dihydrosphingomyelin (d18:0/16:0)*	2290	705.591	Lipid	Dihydrosphingomyelins	LC/MS Pos Late		9939965
sphingomyelin (d18:0/18:0, d19:0/17:0)*	2362	733.622	Lipid	Dihydrosphingomyelins	LC/MS Pos Late				HMDB12087
sphingomyelin (d18:0/20:0, d16:0/22:0)*	2600	761.653	Lipid	Dihydrosphingomyelins	LC/MS Pos Late
leukotriene B4	5186	335.223	Lipid	Eicosanoid	LC/MS Neg	71160-24-2	5280492	C02165	HMDB01085
arachidonoyl ethanolamide	1535	348.29	Lipid	Endocannabinoid	LC/MS Pos Late	94421-68-8	5281969	C11695	HMDB04080
linoleoyl ethanolamide	6150	322.275	Lipid	Endocannabinoid	LC/MS Neg	68171-52-8	5283446		HMDB12252
N-oleoylserine	5600	368.281	Lipid	Endocannabinoid	LC/MS Neg
N-oleoyltaurine	5610	388.253	Lipid	Endocannabinoid	LC/MS Neg	52514-04-2	6437033
N-palmitoylserine	5557	342.265	Lipid	Endocannabinoid	LC/MS Neg	58725-46-5;474943-14-1	6453686
N-stearoyltaurine	5782	390.268	Lipid	Endocannabinoid	LC/MS Neg	63155-80-6	168274
estrone 3-sulfate	4417.3	349.112	Lipid	Estrogenic Steroids	LC/MS Neg	438-67-5	3001028	C02538	HMDB01425
arachidonoylcholine	1390	390.337	Lipid	Fatty Acid Metabolism (Acyl Choline)	LC/MS Pos Late
dihomo-linolenoyl-choline	1424	392.352	Lipid	Fatty Acid Metabolism (Acyl Choline)	LC/MS Pos Late
docosahexaenoylcholine	1378	414.337	Lipid	Fatty Acid Metabolism (Acyl Choline)	LC/MS Pos Late
linoleoylcholine*	1388	366.337	Lipid	Fatty Acid Metabolism (Acyl Choline)	LC/MS Pos Late
oleoylcholine	1449	368.352	Lipid	Fatty Acid Metabolism (Acyl Choline)	LC/MS Pos Late
palmitoylcholine	1482	342.337	Lipid	Fatty Acid Metabolism (Acyl Choline)	LC/MS Pos Late		151731
stearoylcholine*	1520	370.368	Lipid	Fatty Acid Metabolism (Acyl Choline)	LC/MS Pos Late
hexanoylglutamine	2780	243.135	Lipid	Fatty Acid Metabolism (Acyl Glutamine)	LC/MS Neg
butyrylcarnitine (C4)	2860	232.154	Lipid	Fatty Acid Metabolism (also BCAA Metabolism)	LC/MS Pos Early	25576-40-3	439829	C02862	HMDB02013
methylmalonate (MMA)	3078.4	117.019	Lipid	Fatty Acid Metabolism (also BCAA Metabolism)	LC/MS Polar	516-05-2	487	C02170	HMDB00202
propionylcarnitine (C3)	2590	218.139	Lipid	Fatty Acid Metabolism (also BCAA Metabolism)	LC/MS Pos Early	17298-37-2	107738	C03017	HMDB00824
propionylglycine (C3)	960	130.051	Lipid	Fatty Acid Metabolism (also BCAA Metabolism)	LC/MS Neg	21709-90-0	98681		HMDB00783
3-hydroxybutyrylcarnitine (1)	2400	248.149	Lipid	Fatty Acid Metabolism(Acyl Carnitine)	LC/MS Pos Early		53481617		HMDB13127
3-hydroxybutyrylcarnitine (2)	2340	248.149	Lipid	Fatty Acid Metabolism(Acyl Carnitine)	LC/MS Pos Early				HMDB13127
3-hydroxyoleoylcarnitine	1406	442.353	Lipid	Fatty Acid Metabolism(Acyl Carnitine)	LC/MS Pos Late
5-dodecenoylcarnitine (C12:1)	1135	342.264	Lipid	Fatty Acid Metabolism(Acyl Carnitine)	LC/MS Pos Late
acetylcarnitine (C2)	2282	204.123	Lipid	Fatty Acid Metabolism(Acyl Carnitine)	LC/MS Pos Early	5080-50-2	1	C02571	HMDB00201
adipoylcarnitine (C6-DC)	2570	290.16	Lipid	Fatty Acid Metabolism(Acyl Carnitine)	LC/MS Pos Early		71296139		HMDB61677
adrenoylcarnitine (C22:4)*	1415	476.373	Lipid	Fatty Acid Metabolism(Acyl Carnitine)	LC/MS Pos Late
arachidonoylcarnitine (C20:4)	1353	448.342	Lipid	Fatty Acid Metabolism(Acyl Carnitine)	LC/MS Pos Late
arachidoylcarnitine (C20)*	1512	456.405	Lipid	Fatty Acid Metabolism(Acyl Carnitine)	LC/MS Pos Late				HMDB06460
behenoylcarnitine (C22)*	1561	484.436	Lipid	Fatty Acid Metabolism(Acyl Carnitine)	LC/MS Pos Late
cerotoylcarnitine (C26)*	1649	540.499	Lipid	Fatty Acid Metabolism(Acyl Carnitine)	LC/MS Pos Late				HMDB06347
cis-4-decenoylcarnitine (C10:1)	1057	314.233	Lipid	Fatty Acid Metabolism(Acyl Carnitine)	LC/MS Pos Late	98930-66-6
decanoylcarnitine (C10)	1130	316.248	Lipid	Fatty Acid Metabolism(Acyl Carnitine)	LC/MS Pos Late	1492-27-9	10245190		HMDB00651
dihomo-linolenoylcarnitine (C20:3n3 or 6)*	1392	450.358	Lipid	Fatty Acid Metabolism(Acyl Carnitine)	LC/MS Pos Late
dihomo-linoleoylcarnitine (C20:2)*	1436	452.373	Lipid	Fatty Acid Metabolism(Acyl Carnitine)	LC/MS Pos Late
docosahexaenoylcarnitine (C22:6)*	1349	472.342	Lipid	Fatty Acid Metabolism(Acyl Carnitine)	LC/MS Pos Late
docosapentaenoylcarnitine (C22:5n3)*	1387	474.358	Lipid	Fatty Acid Metabolism(Acyl Carnitine)	LC/MS Pos Late
eicosenoylcarnitine (C20:1)*	1484	454.389	Lipid	Fatty Acid Metabolism(Acyl Carnitine)	LC/MS Pos Late
hexanoylcarnitine (C6)	3358	260.186	Lipid	Fatty Acid Metabolism(Acyl Carnitine)	LC/MS Pos Early	6920-35-0	6426853		HMDB00705
laurylcarnitine (C12)	1235	344.28	Lipid	Fatty Acid Metabolism(Acyl Carnitine)	LC/MS Pos Late	25518-54-1	10427569		HMDB02250
lignoceroylcarnitine (C24)*	1603	512.467	Lipid	Fatty Acid Metabolism(Acyl Carnitine)	LC/MS Pos Late
linolenoylcarnitine (C18:3)*	1310	422.326	Lipid	Fatty Acid Metabolism(Acyl Carnitine)	LC/MS Pos Late
linoleoylcarnitine (C18:2)*	1430	424.342	Lipid	Fatty Acid Metabolism(Acyl Carnitine)	LC/MS Pos Late	36816-10-1	6450015		HMDB06469
margaroylcarnitine (C17)*	1424	414.358	Lipid	Fatty Acid Metabolism(Acyl Carnitine)	LC/MS Pos Late	106182-29-0			HMDB06210
myristoleoylcarnitine (C14:1)*	1316	370.295	Lipid	Fatty Acid Metabolism(Acyl Carnitine)	LC/MS Pos Late	889848-55-9	90659872
myristoylcarnitine (C14)	1350	372.311	Lipid	Fatty Acid Metabolism(Acyl Carnitine)	LC/MS Pos Late	18822-89-4	6426854		HMDB05066
nervonoylcarnitine (C24:1)*	1602	510.452	Lipid	Fatty Acid Metabolism(Acyl Carnitine)	LC/MS Pos Late
octadecanedioylcarnitine (C18-DC)*	1227	458.348	Lipid	Fatty Acid Metabolism(Acyl Carnitine)	LC/MS Pos Late	123233-50-1
octadecenedioylcarnitine (C18:1-DC)*	1180	456.332	Lipid	Fatty Acid Metabolism(Acyl Carnitine)	LC/MS Pos Late	251981-06-3
octanoylcarnitine (C8)	950	288.217	Lipid	Fatty Acid Metabolism(Acyl Carnitine)	LC/MS Pos Late	3671-77-0	123701	C02838	HMDB00791
oleoylcarnitine (C18)	1423	426.358	Lipid	Fatty Acid Metabolism(Acyl Carnitine)	LC/MS Pos Late	38677-66-6	6441392		HMDB05065
palmitoleoylcarnitine (C16:1)*	1357	398.326	Lipid	Fatty Acid Metabolism(Acyl Carnitine)	LC/MS Pos Late		71464547
palmitoylcarnitine (C16)	1425	400.342	Lipid	Fatty Acid Metabolism(Acyl Carnitine)	LC/MS Pos Late	6865-14-1	461	C02990	HMDB00222
pimeloylcarnitine/3-methyladipoylcarnitine (C7-DC)	2773	304.175	Lipid	Fatty Acid Metabolism(Acyl Carnitine)	LC/MS Pos Early
stearoylcarnitine (C18)	1485	428.373	Lipid	Fatty Acid Metabolism(Acyl Carnitine)	LC/MS Pos Late	18822-91-8	6426855		HMDB00848
suberoylcarnitine (C8-DC)	2964	318.191	Lipid	Fatty Acid Metabolism(Acyl Carnitine)	LC/MS Pos Early
ximenoylcarnitine (C26:1)*	1607	538.483	Lipid	Fatty Acid Metabolism(Acyl Carnitine)	LC/MS Pos Late
hexanoylglycine (C6)	2900	172.098	Lipid	Fatty Acid Metabolism(Acyl Glycine)	LC/MS Neg	24003-67-6	99463		HMDB00701
N-palmitoylglycine	5580	312.254	Lipid	Fatty Acid Metabolism(Acyl Glycine)	LC/MS Neg	2441-41-0	151008		HMDB13034
trans-2-hexenoylglycine	2707	170.082	Lipid	Fatty Acid Metabolism(Acyl Glycine)	LC/MS Neg
2-methylmalonylcarnitine (C4-DC)	2440	262.129	Lipid	Fatty Acid Synthesis	LC/MS Pos Early	149181-64-6	53481628		HMDB13133
malonylcarnitine	2086	248.113	Lipid	Fatty Acid Synthesis	LC/MS Pos Early	853728-01-5	22833583		HMDB02095
stearamide (18:0)	1800	284.295	Lipid	Fatty Acid, Amide	LC/MS Pos Late	124-26-5	31292	C13846	HMDB34146
2-aminoheptanoate	3160	146.118	Lipid	Fatty Acid, Amino	LC/MS Pos Early	1115-90-8	227939
2-aminooctanoate	750	160.133	Lipid	Fatty Acid, Amino	LC/MS Pos Late	644-90-6	69522		HMDB00991
N-acetyl-2-aminooctanoate*	3943	200.129	Lipid	Fatty Acid, Amino	LC/MS Neg		95555		HMDB59745
15-methylpalmitate (i17:0)	5695	269.249	Lipid	Fatty Acid, Branched	LC/MS Neg		17903417
17-methylstearate (i19:0)	5993	297.28	Lipid	Fatty Acid, Branched	LC/MS Neg	2724-59-6	3083779		HMDB37397
2-hydroxyphytanate*	5751	327.29	Lipid	Fatty Acid, Branched	LC/MS Neg	14721-68-7	189026
pristanate	5773	297.28	Lipid	Fatty Acid, Branched	LC/MS Neg	1189-37-3	123929		HMDB00795
2-hydroxyadipate	3000	161.046	Lipid	Fatty Acid, Dicarboxylate	LC/MS Polar	18294-85-4	193530	C02360	HMDB00321
2-hydroxyglutarate	958	131.034	Lipid	Fatty Acid, Dicarboxylate	LC/MS Pos Early	40951-21-1	43	C02630	HMDB00606
3-carboxy-4-methyl-5-pentyl-2-furanpropionate (3-CMPFP)	4000	267.124	Lipid	Fatty Acid, Dicarboxylate	LC/MS Neg		194501
3-carboxy-4-methyl-5-propyl-2-furanpropanoate (CMPF)	2800	239.092	Lipid	Fatty Acid, Dicarboxylate	LC/MS Neg	86879-39-2	123979		HMDB61112
3-hydroxyadipate*	3131	161.046	Lipid	Fatty Acid, Dicarboxylate	LC/MS Polar		151913		HMDB00345
3-methyladipate	2865	159.066	Lipid	Fatty Acid, Dicarboxylate	LC/MS Polar	3058-01-03	12292		HMDB00555
4-hydroxy-2-oxoglutaric acid	3073	161.009	Lipid	Fatty Acid, Dicarboxylate	LC/MS Polar	1187-99-1	599	C01127	HMDB02070
adipate	3000	145.051	Lipid	Fatty Acid, Dicarboxylate	LC/MS Polar	124-04-9	196	C06104	HMDB00448
azelate (nonanedioate; C9)	1276	187.098	Lipid	Fatty Acid, Dicarboxylate	LC/MS Neg	123-99-9	2266	C08261	HMDB00784
docosadioate (C22-DC)	5291.8	369.301	Lipid	Fatty Acid, Dicarboxylate	LC/MS Neg	505-56-6	244872	C19625
dodecadienoate (12:2)*	5146	195.139	Lipid	Fatty Acid, Dicarboxylate	LC/MS Neg
dodecanedioate (C12)	2990	229.145	Lipid	Fatty Acid, Dicarboxylate	LC/MS Neg	693-23-2	12736	C02678	HMDB00623
dodecenedioate (C12:1-DC)*	2700	227.129	Lipid	Fatty Acid, Dicarboxylate	LC/MS Neg
eicosanodioate (C20-DC)	5200.9	341.27	Lipid	Fatty Acid, Dicarboxylate	LC/MS Neg	2424-92-2	75502
glutarate (C5-DC)	2900	131.035	Lipid	Fatty Acid, Dicarboxylate	LC/MS Polar	110-94-1	743	C00489	HMDB00661
heptenedioate (C7:1-DC)*	2816	157.051	Lipid	Fatty Acid, Dicarboxylate	LC/MS Polar
hexadecanedioate (C16)	4615	285.207	Lipid	Fatty Acid, Dicarboxylate	LC/MS Neg	505-54-4	10459	C19615	HMDB00672
hexadecenedioate (C16:1-DC)*	4380	283.191	Lipid	Fatty Acid, Dicarboxylate	LC/MS Neg
hydroxy-CMPF*	1516	255.087	Lipid	Fatty Acid, Dicarboxylate	LC/MS Neg
maleate	2640	115.004	Lipid	Fatty Acid, Dicarboxylate	LC/MS Polar	110-16-7	444266	C01384	HMDB00176
octadecadienedioate (C18:2-DC)*	4676	309.207	Lipid	Fatty Acid, Dicarboxylate	LC/MS Neg
octadecanedioate (C18)	5043	313.238	Lipid	Fatty Acid, Dicarboxylate	LC/MS Neg	871-70-5	70095		HMDB00782
octadecenedioate (C18:1-DC)*	4875	311.223	Lipid	Fatty Acid, Dicarboxylate	LC/MS Neg
sebacate (C10-DC)	1788	201.113	Lipid	Fatty Acid, Dicarboxylate	LC/MS Neg	111-20-6	5192	C08277	HMDB00792
suberate (C8-DC)	804.3	173.082	Lipid	Fatty Acid, Dicarboxylate	LC/MS Neg	505-48-6	10457	C08278	HMDB00893
tetradecanedioate (C14)	4000	257.176	Lipid	Fatty Acid, Dicarboxylate	LC/MS Neg	821-38-5	13185		HMDB00872
12,13-DiHOME	5137	313.238	Lipid	Fatty Acid, Dihydroxy	LC/MS Neg	263399-35-5	10236635	C14829	HMDB04705
9,10-DiHOME	5180	313.238	Lipid	Fatty Acid, Dihydroxy	LC/MS Neg	263399-34-4	9966640	C14828	HMDB04704
13-HODE + 9-HODE	5275	295.228	Lipid	Fatty Acid, Monohydroxy	LC/MS Neg		43013
16-hydroxypalmitate	5236.2	271.228	Lipid	Fatty Acid, Monohydroxy	LC/MS Neg	506-13-8	10466	C18218	HMDB06294
2-hydroxyarachidate*	5990	327.29	Lipid	Fatty Acid, Monohydroxy	LC/MS Neg		5225199
2-hydroxybehenate	6384	355.322	Lipid	Fatty Acid, Monohydroxy	LC/MS Neg		193484
2-hydroxydecanoate	4840	187.134	Lipid	Fatty Acid, Monohydroxy	LC/MS Neg	5393-81-7	21488
2-hydroxylaurate	5211	215.165	Lipid	Fatty Acid, Monohydroxy	LC/MS Neg	2984-55-6	97783
2-hydroxynervonate*	6345	381.337	Lipid	Fatty Acid, Monohydroxy	LC/MS Neg		5312783
2-hydroxyoctanoate	3736.8	159.103	Lipid	Fatty Acid, Monohydroxy	LC/MS Neg	617-73-2	94180		HMDB02264
2-hydroxypalmitate	5511.2	271.228	Lipid	Fatty Acid, Monohydroxy	LC/MS Neg	764-67-0	92836		HMDB31057
2-hydroxystearate	5695	299.259	Lipid	Fatty Acid, Monohydroxy	LC/MS Neg	629-22-1	69417	C03045
3-hydroxydecanoate	4634.7	187.134	Lipid	Fatty Acid, Monohydroxy	LC/MS Neg	5561-87-5	26612		HMDB02203
3-hydroxyhexanoate	1725	131.071	Lipid	Fatty Acid, Monohydroxy	LC/MS Neg	10191-24-9	151492
3-hydroxylaurate	5175	215.165	Lipid	Fatty Acid, Monohydroxy	LC/MS Neg	53941-38-1	94216		HMDB00387
3-hydroxymyristate	5335	243.197	Lipid	Fatty Acid, Monohydroxy	LC/MS Neg	3422-31-9	16064
3-hydroxyoctanoate	3446	159.103	Lipid	Fatty Acid, Monohydroxy	LC/MS Neg	88930-08-9	26613		HMDB01954
3-hydroxyoleate*	5508	297.244	Lipid	Fatty Acid, Monohydroxy	LC/MS Neg
3-hydroxystearate	5674	299.259	Lipid	Fatty Acid, Monohydroxy	LC/MS Neg	45261-96-9	5282907
5-hydroxyhexanoate	1267	131.071	Lipid	Fatty Acid, Monohydroxy	LC/MS Neg	44843-89-2	170748		HMDB00525
5-hydroxyvalproate	2978	143.107	Lipid	Fatty Acid, Monohydroxy	LC/MS Pos Early	53660-23-4	135244	C16650	HMDB13898
glycerol	758	91.0401	Lipid	Glycerolipid Metabolism	LC/MS Neg	56-81-5	753	C00116	HMDB00131
glycerol 3-phosphate	580	173.021	Lipid	Glycerolipid Metabolism	LC/MS Pos Early	29849-82-9	754	C00093	HMDB00126
glycerophosphoglycerol	2430	245.043	Lipid	Glycerolipid Metabolism	LC/MS Polar		439964	C03274
glycosyl ceramide (d18:1/20:0, d16:1/22:0)*	3414	756.635	Lipid	Hexosylceramides (HCER)	LC/MS Pos Late
glycosyl ceramide (d18:1/23:1, d17:1/24:1)*	3667	796.666	Lipid	Hexosylceramides (HCER)	LC/MS Pos Late
glycosyl ceramide (d18:2/24:1, d18:1/24:2)*	3380	808.666	Lipid	Hexosylceramides (HCER)	LC/MS Pos Late
glycosyl-N-(2-hydroxynervonoyl)-sphingosine (d18:1/24:1(2OH))*	3839	826.677	Lipid	Hexosylceramides (HCER)	LC/MS Pos Late
glycosyl-N-behenoyl-sphingadienine (d18:2/22:0)*	3420	782.65	Lipid	Hexosylceramides (HCER)	LC/MS Pos Late
glycosyl-N-palmitoyl-sphingosine (d18:1/16:0)	2623	700.572	Lipid	Hexosylceramides (HCER)	LC/MS Pos Late
glycosyl-N-stearoyl-sphingosine (d18:1/18:0)	3053	728.604	Lipid	Hexosylceramides (HCER)	LC/MS Pos Late
myo-inositol	3506.3	225.062	Lipid	Inositol Metabolism	LC/MS Polar	87-89-8	892	C00137	HMDB00211
3-hydroxybutyrate (BHBA)	1444	103.04	Lipid	Ketone Bodies	LC/MS Polar	625-72-9	441	C01089	HMDB00357
acetoacetate	1062	103.039	Lipid	Ketone Bodies	LC/MS Pos Early	3483-11-02	96	C00164	HMDB00060
lactosyl-N-behenoyl-sphingosine (d18:1/22:0)*	3842	946.719	Lipid	Lactosylceramides (LCER)	LC/MS Pos Late
lactosyl-N-nervonoyl-sphingosine (d18:1/24:1)*	3778	972.735	Lipid	Lactosylceramides (LCER)	LC/MS Pos Late
lactosyl-N-palmitoyl-sphingosine (d18:1/16:0)	2527	862.625	Lipid	Lactosylceramides (LCER)	LC/MS Pos Late	4201-62-1
10-heptadecenoate (17:1n7)	5555	267.233	Lipid	Long Chain Fatty Acid	LC/MS Neg	29743-97-3	5312435		HMDB60038
10-nonadecenoate (19:1n9)	5780	295.264	Lipid	Long Chain Fatty Acid	LC/MS Neg	73033-09-7	5312513		HMDB13622
arachidate (20:0)	6240	311.296	Lipid	Long Chain Fatty Acid	LC/MS Neg	506-30-9	10467	C06425	HMDB02212
eicosenoate (20:1n9 or 1n11)	5950	309.28	Lipid	Long Chain Fatty Acid	LC/MS Neg		5282768	C16526	HMDB02231
erucate (22:1n9)	6355.6	337.311	Lipid	Long Chain Fatty Acid	LC/MS Neg	112-86-7	5281116	C08316	HMDB02068
margarate (17:0)	5731	269.249	Lipid	Long Chain Fatty Acid	LC/MS Neg	506-12-7	10465		HMDB02259
myristate (14:0)	5440	227.202	Lipid	Long Chain Fatty Acid	LC/MS Neg	544-63-8	11005	C06424	HMDB00806
myristoleate (14:1n5)	5346.9	225.186	Lipid	Long Chain Fatty Acid	LC/MS Neg	544-64-9	5281119	C08322	HMDB02000
nonadecanoate (19:0)	6068	297.28	Lipid	Long Chain Fatty Acid	LC/MS Neg	646-30-0	12591	C16535	HMDB00772
oleate/vaccenate (18:1)	5655	281.249	Lipid	Long Chain Fatty Acid	LC/MS Neg
palmitate (16:0)	5618	255.233	Lipid	Long Chain Fatty Acid	LC/MS Neg	57-10-3	985	C00249	HMDB00220
palmitoleate (16:1n7)	5475	253.217	Lipid	Long Chain Fatty Acid	LC/MS Neg	373-49-9	445638	C08362	HMDB03229
pentadecanoate (15:0)	5521	241.217	Lipid	Long Chain Fatty Acid	LC/MS Neg	1002-84-2;10002-84-2	13849	C16537	HMDB00826
stearate (18:0)	5872	283.264	Lipid	Long Chain Fatty Acid	LC/MS Neg	57-11-4	5281	C01530	HMDB00827
1-arachidonoyl-GPC* (20:4)*	1460	544.34	Lipid	Lysophospholipid	LC/MS Pos Late			C05208	HMDB10395
1-arachidonoyl-GPE (20:4n6)*	1470	502.293	Lipid	Lysophospholipid	LC/MS Pos Late		42607465		HMDB11517
1-arachidonoyl-GPI* (20:4)*	5482	619.289	Lipid	Lysophospholipid	LC/MS Neg				HMDB61690
1-cerotoyl-GPC (26:0)*	1990	636.496	Lipid	Lysophospholipid	LC/MS Pos Late				HMDB29205
1-lignoceroyl-GPC (24:0)	1907	608.465	Lipid	Lysophospholipid	LC/MS Pos Late	325171-59-3			HMDB10405
1-linolenoyl-GPC (18:3)*	1410	518.324	Lipid	Lysophospholipid	LC/MS Pos Late				HMDB10388
1-linoleoyl-GPA (18:2)*	1550	435.251	Lipid	Lysophospholipid	LC/MS Pos Late				HMDB07856
1-linoleoyl-GPC (18:2)	1465	520.34	Lipid	Lysophospholipid	LC/MS Pos Late		11988421	C04100	HMDB10386
1-linoleoyl-GPE (18:2)*	1482	478.293	Lipid	Lysophospholipid	LC/MS Pos Late		52925130		HMDB11507
1-linoleoyl-GPG (18:2)*	5516	507.273	Lipid	Lysophospholipid	LC/MS Neg
1-linoleoyl-GPI* (18:2)*	5494	595.289	Lipid	Lysophospholipid	LC/MS Neg
1-oleoyl-GPC (18:1)	1540	522.355	Lipid	Lysophospholipid	LC/MS Pos Late	19420-56-5	16081932		HMDB02815
1-oleoyl-GPE (18:1)	1554	480.308	Lipid	Lysophospholipid	LC/MS Pos Late	89576-29-4	9547071		HMDB11506
1-oleoyl-GPG (18:1)*	5610	509.288	Lipid	Lysophospholipid	LC/MS Neg
1-oleoyl-GPI (18:1)*	5599	597.305	Lipid	Lysophospholipid	LC/MS Neg
1-palmitoleoyl-GPC* (16:1)*	1450	494.324	Lipid	Lysophospholipid	LC/MS Pos Late		24779461		HMDB10383
1-palmitoyl-GPA (16:0)	1625	393.24	Lipid	Lysophospholipid	LC/MS Pos Late	17618-08-5	6419701	C04036	HMDB00327
1-palmitoyl-GPC (16:0)	1525	496.34	Lipid	Lysophospholipid	LC/MS Pos Late	17364-16-8	86554		HMDB10382
1-palmitoyl-GPE (16:0)	1544	454.293	Lipid	Lysophospholipid	LC/MS Pos Late	53862-35-4	9547069		HMDB11503
1-palmitoyl-GPG (16:0)*	5570	483.273	Lipid	Lysophospholipid	LC/MS Neg		3300276
1-palmitoyl-GPI* (16:0)	5564	571.289	Lipid	Lysophospholipid	LC/MS Neg				HMDB61695
1-stearoyl-GPC (18:0)	1606	524.371	Lipid	Lysophospholipid	LC/MS Pos Late	19420-57-6	497299		HMDB10384
1-stearoyl-GPE (18:0)	1626	482.324	Lipid	Lysophospholipid	LC/MS Pos Late	69747-55-3	9547068		HMDB11130
1-stearoyl-GPI (18:0)	5794	599.32	Lipid	Lysophospholipid	LC/MS Neg	796963-93-4			HMDB61696
2-palmitoyl-GPC* (16:0)*	6215	570.341	Lipid	Lysophospholipid	LC/MS Neg		15061532		HMDB61702
2-stearoyl-GPE (18:0)*	6350	480.31	Lipid	Lysophospholipid	LC/MS Neg				HMDB11129
1-(1-enyl-oleoyl)-GPE (P-18:1)*	1566	464.314	Lipid	Lysoplasmalogen	LC/MS Pos Late
1-(1-enyl-palmitoyl)-GPC (P-16:0)*	1547	480.345	Lipid	Lysoplasmalogen	LC/MS Pos Late		10917802		HMDB10407
1-(1-enyl-palmitoyl)-GPE (P-16:0)*	1558	438.298	Lipid	Lysoplasmalogen	LC/MS Pos Late
1-(1-enyl-stearoyl)-GPE (P-18:0)*	1649	466.329	Lipid	Lysoplasmalogen	LC/MS Pos Late
10-undecenoate (11:1n1)	5085.8	183.139	Lipid	Medium Chain Fatty Acid	LC/MS Neg	1333-28-4	14891	C13910	HMDB33724
5-dodecenoate (12:1n7)	5224	197.155	Lipid	Medium Chain Fatty Acid	LC/MS Neg	2430-94-6	5312378		HMDB00529
caprate (10:0)	5090.7	171.139	Lipid	Medium Chain Fatty Acid	LC/MS Neg	334-48-5	2969	C01571	HMDB00511
caproate (6:0)	2713.7	115.076	Lipid	Medium Chain Fatty Acid	LC/MS Neg	142-62-1	8892	C01585	HMDB00535
caprylate (8:0)	4362	143.108	Lipid	Medium Chain Fatty Acid	LC/MS Neg	124-07-2	379	C06423	HMDB00482
heptanoate (7:0)	3670	129.092	Lipid	Medium Chain Fatty Acid	LC/MS Neg	111-14-8	8094	C17714	HMDB00666
laurate (12:0)	5300	199.17	Lipid	Medium Chain Fatty Acid	LC/MS Neg	143-07-7	3893	C02679	HMDB00638
pelargonate (9:0)	4798	157.123	Lipid	Medium Chain Fatty Acid	LC/MS Neg	112-05-0	8158	C01601	HMDB00847
3-hydroxy-3-methylglutarate	2850	161.046	Lipid	Mevalonate Metabolism	LC/MS Polar	503-49-1	1662	C03761	HMDB00355
1-dihomo-linolenylglycerol (20:3)	6400	305.249	Lipid	Monoacylglycerol	LC/MS Neg
1-dihomo-linoleoylglycerol (20:2)	6800	307.264	Lipid	Monoacylglycerol	LC/MS Neg
1-docosahexaenoylglycerol (22:6)	1542	420.311	Lipid	Monoacylglycerol	LC/MS Pos Late				HMDB11587
1-linolenoylglycerol (18:3)	6214	277.217	Lipid	Monoacylglycerol	LC/MS Neg	124151-74-2	53480978		HMDB11569
1-linoleoylglycerol (18:2)	6477	279.233	Lipid	Monoacylglycerol	LC/MS Neg	2277-28-3	5283469
1-myristoylglycerol (14:0)	6353.3	227.202	Lipid	Monoacylglycerol	LC/MS Neg	75685-84-6	79050	C01885	HMDB11561
1-oleoylglycerol (18:1)	6650	281.249	Lipid	Monoacylglycerol	LC/MS Neg	111-03-5	5283468		HMDB11567
1-palmitoleoylglycerol (16:1)*	6094	253.217	Lipid	Monoacylglycerol	LC/MS Neg				HMDB11565
1-palmitoylglycerol (16:0)	6550	255.233	Lipid	Monoacylglycerol	LC/MS Neg	542-44-9	14900		HMDB31074
2-linoleoylglycerol (18:2)	6250	279.233	Lipid	Monoacylglycerol	LC/MS Neg	3443-82-1	5365676		HMDB11538
2-oleoylglycerol (18:1)	6500	281.249	Lipid	Monoacylglycerol	LC/MS Neg	3443-84-3	5319879		HMDB11537
1,2-dilinoleoyl-GPC (18:2/18:2)	2006	782.569	Lipid	Phosphatidylcholine (PC)	LC/MS Pos Late	998-06-1	5288075		HMDB08138
1,2-dipalmitoyl-GPC (16:0/16:0)	2365	734.569	Lipid	Phosphatidylcholine (PC)	LC/MS Pos Late	63-89-8	452110		HMDB00564
1-linoleoyl-2-linolenoyl-GPC (18:2/18:3)*	1939	780.554	Lipid	Phosphatidylcholine (PC)	LC/MS Pos Late				HMDB08141
1-myristoyl-2-arachidonoyl-GPC (14:0/20:4)*	1914	754.538	Lipid	Phosphatidylcholine (PC)	LC/MS Pos Late				HMDB07883
1-myristoyl-2-palmitoyl-GPC (14:0/16:0)	2147	706.538	Lipid	Phosphatidylcholine (PC)	LC/MS Pos Late	69525-80-0	129657		HMDB07869
1-oleoyl-2-docosahexaenoyl-GPC (18:1/22:6)*	2011	832.585	Lipid	Phosphatidylcholine (PC)	LC/MS Pos Late				HMDB08123
1-palmitoleoyl-2-linolenoyl-GPC (16:1/18:3)*	1850	754.538	Lipid	Phosphatidylcholine (PC)	LC/MS Pos Late				HMDB08008
1-palmitoyl-2-arachidonoyl-GPC (16:0/20:4n6)	2091	782.569	Lipid	Phosphatidylcholine (PC)	LC/MS Pos Late	35418-58-7	10747814		HMDB07982
1-palmitoyl-2-docosahexaenoyl-GPC (16:0/22:6)	2023	806.569	Lipid	Phosphatidylcholine (PC)	LC/MS Pos Late	59403-54-2	6441886		HMDB07991
1-palmitoyl-2-linoleoyl-GPC (16:0/18:2)	2160	758.569	Lipid	Phosphatidylcholine (PC)	LC/MS Pos Late	40811-94-7	5287971		HMDB07973
1-palmitoyl-2-oleoyl-GPC (16:0/18:1)	2358	760.585	Lipid	Phosphatidylcholine (PC)	LC/MS Pos Late	26853-31-6;26853-31-6	6436017		HMDB07972
1-palmitoyl-2-palmitoleoyl-GPC (16:0/16:1)*	2160	732.554	Lipid	Phosphatidylcholine (PC)	LC/MS Pos Late				HMDB07969
1-palmitoyl-2-stearoyl-GPC (16:0/18:0)	2653	762.601	Lipid	Phosphatidylcholine (PC)	LC/MS Pos Late	59403-51-9			HMDB07970
1-stearoyl-2-arachidonoyl-GPC (18:0/20:4)	2300	810.601	Lipid	Phosphatidylcholine (PC)	LC/MS Pos Late	35418-59-8	16219824		HMDB08048
1-stearoyl-2-docosahexaenoyl-GPC (18:0/22:6)	2197	834.601	Lipid	Phosphatidylcholine (PC)	LC/MS Pos Late	59403-52-0			HMDB08057
1-stearoyl-2-linoleoyl-GPC (18:0/18:2)*	2380	786.601	Lipid	Phosphatidylcholine (PC)	LC/MS Pos Late				HMDB08039
1-stearoyl-2-oleoyl-GPC (18:0/18:1)	2644	788.616	Lipid	Phosphatidylcholine (PC)	LC/MS Pos Late	56421-10-4			HMDB08038
1,2-dilinoleoyl-GPE (18:2/18:2)*	2083	740.522	Lipid	Phosphatidylethanolamine (PE)	LC/MS Pos Late		9546812		HMDB09093
1,2-dipalmitoyl-GPE (16:0/16:0)*	2498	692.522	Lipid	Phosphatidylethanolamine (PE)	LC/MS Pos Late		445468		HMDB08923
1-oleoyl-2-arachidonoyl-GPE (18:1/20:4)*	2200	766.538	Lipid	Phosphatidylethanolamine (PE)	LC/MS Pos Late				HMDB09069
1-oleoyl-2-docosahexaenoyl-GPE (18:1/22:6)*	2119	790.538	Lipid	Phosphatidylethanolamine (PE)	LC/MS Pos Late
1-oleoyl-2-linoleoyl-GPE (18:1/18:2)*	2270	742.538	Lipid	Phosphatidylethanolamine (PE)	LC/MS Pos Late		9546753		HMDB05349
1-palmitoyl-2-arachidonoyl-GPE (16:0/20:4)*	2198	740.522	Lipid	Phosphatidylethanolamine (PE)	LC/MS Pos Late		9546800		HMDB05323
1-palmitoyl-2-docosahexaenoyl-GPE (16:0/22:6)*	2119	764.522	Lipid	Phosphatidylethanolamine (PE)	LC/MS Pos Late		9546799		HMDB05324
1-palmitoyl-2-linoleoyl-GPE (16:0/18:2)	2275	716.522	Lipid	Phosphatidylethanolamine (PE)	LC/MS Pos Late		9546747		HMDB05322
1-palmitoyl-2-oleoyl-GPE (16:0/18:1)	2509	718.538	Lipid	Phosphatidylethanolamine (PE)	LC/MS Pos Late	26662-94-2	5283496		HMDB05320
1-palmitoyl-2-stearoyl-GPE (16:0/18:0)*	2850	720.554	Lipid	Phosphatidylethanolamine (PE)	LC/MS Pos Late		5326793		HMDB08925
1-stearoyl-2-arachidonoyl-GPE (18:0/20:4)	2424	768.554	Lipid	Phosphatidylethanolamine (PE)	LC/MS Pos Late		5289133		HMDB09003
1-stearoyl-2-docosahexaenoyl-GPE (18:0/22:6)*	2317	792.554	Lipid	Phosphatidylethanolamine (PE)	LC/MS Pos Late		9546798		HMDB05334
1-stearoyl-2-linoleoyl-GPE (18:0/18:2)*	2522	744.554	Lipid	Phosphatidylethanolamine (PE)	LC/MS Pos Late		9546749		HMDB08994
1-stearoyl-2-oleoyl-GPE (18:0/18:1)	2858	746.569	Lipid	Phosphatidylethanolamine (PE)	LC/MS Pos Late				HMDB08993
1-palmitoyl-2-arachidonoyl-GPI (16:0/20:4)*	2567	876.56	Lipid	Phosphatidylinositol (PI)	LC/MS Pos Late				HMDB09789
1-palmitoyl-2-linoleoyl-GPI (16:0/18:2)	2730	852.56	Lipid	Phosphatidylinositol (PI)	LC/MS Pos Late				HMDB09784
1-palmitoyl-2-oleoyl-GPI (16:0/18:1)*	3140	854.575	Lipid	Phosphatidylinositol (PI)	LC/MS Pos Late				HMDB09783
1-stearoyl-2-arachidonoyl-GPI (18:0/20:4)	3000	904.591	Lipid	Phosphatidylinositol (PI)	LC/MS Pos Late	383907-33-3			HMDB09815
1-stearoyl-2-linoleoyl-GPI (18:0/18:2)	3185	880.591	Lipid	Phosphatidylinositol (PI)	LC/MS Pos Late				HMDB09809
1-stearoyl-2-oleoyl-GPI (18:0/18:1)*	3711	882.607	Lipid	Phosphatidylinositol (PI)	LC/MS Pos Late
1-stearoyl-2-oleoyl-GPS (18:0/18:1)	3000	790.559	Lipid	Phosphatidylserine (PS)	LC/MS Pos Late		9547087		HMDB10163
choline	1961	104.107	Lipid	Phospholipid Metabolism	LC/MS Pos Early	67-48-1	305	C00114	HMDB00097
glycerophosphoethanolamine	659	216.063	Lipid	Phospholipid Metabolism	LC/MS Pos Early	33049-08-0	123874	C01233	HMDB00114
glycerophosphorylcholine (GPC)	672	258.11	Lipid	Phospholipid Metabolism	LC/MS Pos Early	28319-77-9	71920	C00670	HMDB00086
phosphocholine	700	184.073	Lipid	Phospholipid Metabolism	LC/MS Pos Early	72556-74-2	1014	C00588	HMDB01565
phosphoethanolamine (PE)	700	142.026	Lipid	Phospholipid Metabolism	LC/MS Pos Early	1071-23-4	1015	C00346	HMDB00224
trimethylamine N-oxide	2100	76.0757	Lipid	Phospholipid Metabolism	LC/MS Pos Early	1184-78-7	1145	C01104	HMDB00925
1-(1-enyl-palmitoyl)-2-arachidonoyl-GPC (P-16:0/20:4)*	2154	766.575	Lipid	Plasmalogen	LC/MS Pos Late				HMDB11220
1-(1-enyl-palmitoyl)-2-arachidonoyl-GPE (P-16:0/20:4)*	2270	724.528	Lipid	Plasmalogen	LC/MS Pos Late				HMDB11352
1-(1-enyl-palmitoyl)-2-linoleoyl-GPC (P-16:0/18:2)*	2226	742.575	Lipid	Plasmalogen	LC/MS Pos Late				HMDB11211
1-(1-enyl-palmitoyl)-2-linoleoyl-GPE (P-16:0/18:2)*	2351	700.528	Lipid	Plasmalogen	LC/MS Pos Late				HMDB11343
1-(1-enyl-palmitoyl)-2-oleoyl-GPC (P-16:0/18:1)*	2443	744.59	Lipid	Plasmalogen	LC/MS Pos Late
1-(1-enyl-palmitoyl)-2-oleoyl-GPE (P-16:0/18:1)*	2600	702.543	Lipid	Plasmalogen	LC/MS Pos Late				HMDB11342
1-(1-enyl-palmitoyl)-2-palmitoleoyl-GPC (P-16:0/16:1)*	2218	716.559	Lipid	Plasmalogen	LC/MS Pos Late				HMDB11207
1-(1-enyl-palmitoyl)-2-palmitoyl-GPC (P-16:0/16:0)*	2454	718.575	Lipid	Plasmalogen	LC/MS Pos Late		11146967		HMDB11206
1-(1-enyl-stearoyl)-2-arachidonoyl-GPE (P-18:0/20:4)*	2511	752.559	Lipid	Plasmalogen	LC/MS Pos Late		9547058		HMDB05779
1-(1-enyl-stearoyl)-2-linoleoyl-GPE (P-18:0/18:2)*	2633	728.559	Lipid	Plasmalogen	LC/MS Pos Late				HMDB11376
1-(1-enyl-stearoyl)-2-oleoyl-GPE (P-18:0/18:1)	2950	730.575	Lipid	Plasmalogen	LC/MS Pos Late	144371-68-6			HMDB11375
adrenate (22:4n6)	5678	331.264	Lipid	Polyunsaturated Fatty Acid (n3 and n6)	LC/MS Neg	2091-25-0	5497181	C16527	HMDB02226
arachidonate (20:4n6)	5535	303.233	Lipid	Polyunsaturated Fatty Acid (n3 and n6)	LC/MS Neg	506-32-1	444899	C00219	HMDB01043
dihomolinoleate (20:2n6)	5730	307.264	Lipid	Polyunsaturated Fatty Acid (n3 and n6)	LC/MS Neg	2091-39-6	6439848	C16525	HMDB05060
dihomolinolenate (20:3n3 or 3n6)	5596	305.249	Lipid	Polyunsaturated Fatty Acid (n3 and n6)	LC/MS Neg	17046-59-2	5280581	C03242	HMDB02925
docosadienoate (22:2n6)	6034	335.296	Lipid	Polyunsaturated Fatty Acid (n3 and n6)	LC/MS Neg	7370-49-2	5282807	C16533	HMDB61714
docosahexaenoate (DHA; 22:6n3)	5525	327.233	Lipid	Polyunsaturated Fatty Acid (n3 and n6)	LC/MS Neg	6217-54-5	445580	C06429	HMDB02183
docosapentaenoate (DPA; 22:5n3)	5571	329.249	Lipid	Polyunsaturated Fatty Acid (n3 and n6)	LC/MS Neg	2234-74-4	6441454	C16513	HMDB06528
docosapentaenoate (n6 DPA; 22:5n6)	5624.5	329.249	Lipid	Polyunsaturated Fatty Acid (n3 and n6)	LC/MS Neg	25182-74-5	6441454	C16513	HMDB01976
docosatrienoate (22:3n3)	5823	333.28	Lipid	Polyunsaturated Fatty Acid (n3 and n6)	LC/MS Neg	59708-86-0	5312556	C16534	HMDB02823
docosatrienoate (22:3n6)*	5850	333.28	Lipid	Polyunsaturated Fatty Acid (n3 and n6)	LC/MS Neg
eicosapentaenoate (EPA; 20:5n3)	5450	301.217	Lipid	Polyunsaturated Fatty Acid (n3 and n6)	LC/MS Neg	10-2005-9;10417-94-4	446284	C06428	HMDB01999
hexadecadienoate (16:2n6)	5398	251.202	Lipid	Polyunsaturated Fatty Acid (n3 and n6)	LC/MS Neg	28290-73-5			HMDB00477
linoleate (18:2n6)	5535	279.233	Lipid	Polyunsaturated Fatty Acid (n3 and n6)	LC/MS Neg	60-33-3	5280450	C01595	HMDB00673
linolenate (18:3n3 or 3n6)	5450	277.217	Lipid	Polyunsaturated Fatty Acid (n3 and n6)	LC/MS Neg		5280934	C06426	HMDB03073
stearidonate (18:4n3)	5395	275.202	Lipid	Polyunsaturated Fatty Acid (n3 and n6)	LC/MS Neg	111174-40-4	5312508	C16300	HMDB06547
17alpha-hydroxypregnenolone 3-sulfate	4800	411.185	Lipid	Pregnenolone Steroids	LC/MS Neg	28901-70-4	152971		HMDB00416
21-hydroxypregnanolone disulfate	4300	246.075	Lipid	Pregnenolone Steroids	LC/MS Neg
21-hydroxypregnenolone disulfate	3935	245.067	Lipid	Pregnenolone Steroids	LC/MS Neg	1164-98-3	134595
pregnen-diol disulfate*	3868	238.077	Lipid	Pregnenolone Steroids	LC/MS Neg
pregnenediol sulfate (C21H34O5S)*	5000	397.205	Lipid	Pregnenolone Steroids	LC/MS Neg	1247-64-9
pregnenolone sulfate	5100	395.19	Lipid	Pregnenolone Steroids	LC/MS Neg	1247-64-9	105074		HMDB00774
chenodeoxycholate	5264	391.285	Lipid	Primary Bile Acid Metabolism	LC/MS Neg	474-24-9;474-25-9	10133	C02528	HMDB00518
cholate	5165	407.28	Lipid	Primary Bile Acid Metabolism	LC/MS Neg	81-25-4	221493	C00695	HMDB00619
glyco-alpha-muricholate	4734	464.302	Lipid	Primary Bile Acid Metabolism	LC/MS Neg
glyco-beta-muricholate	4762	464.302	Lipid	Primary Bile Acid Metabolism	LC/MS Neg
glycochenodeoxycholate	5236.1	448.307	Lipid	Primary Bile Acid Metabolism	LC/MS Neg	16564-43-5	12544	C05466	HMDB00637
glycochenodeoxycholate glucuronide (1)	4806	311.666	Lipid	Primary Bile Acid Metabolism	LC/MS Neg
glycochenodeoxycholate sulfate	4820	263.628	Lipid	Primary Bile Acid Metabolism	LC/MS Neg
glycocholate	5163	464.302	Lipid	Primary Bile Acid Metabolism	LC/MS Neg	475-31-0;863-57-0	10140	C01921	HMDB00138
glycocholate glucuronide (1)	4533	640.334	Lipid	Primary Bile Acid Metabolism	LC/MS Neg
glycocholate sulfate	4560	271.626	Lipid	Primary Bile Acid Metabolism	LC/MS Neg
tauro-beta-muricholate	4774	514.284	Lipid	Primary Bile Acid Metabolism	LC/MS Neg	25696-60-0	168408		HMDB00932
taurochenodeoxycholate	5250	498.289	Lipid	Primary Bile Acid Metabolism	LC/MS Neg	6009-98-9	387316	C05465	HMDB00951
taurocholate	5150	514.284	Lipid	Primary Bile Acid Metabolism	LC/MS Neg	145-42-6	6675	C05122	HMDB00036
5alpha-pregnan-3beta,20alpha-diol disulfate	3962	239.085	Lipid	Progestin Steroids	LC/MS Neg
5alpha-pregnan-3beta,20alpha-diol monosulfate (2)	5060	399.221	Lipid	Progestin Steroids	LC/MS Neg
5alpha-pregnan-3beta,20beta-diol monosulfate (1)	5180	399.221	Lipid	Progestin Steroids	LC/MS Neg
5alpha-pregnan-diol disulfate	4310	239.085	Lipid	Progestin Steroids	LC/MS Neg		5127902
pregnanediol-3-glucuronide	5145	495.296	Lipid	Progestin Steroids	LC/MS Neg	1852-49-9	123796		HMDB10318
pregnanolone/allopregnanolone sulfate	5160	397.205	Lipid	Progestin Steroids	LC/MS Neg
3b-hydroxy-5-cholenoic acid	5205	373.275	Lipid	Secondary Bile Acid Metabolism	LC/MS Neg	5255-17-4	92997		HMDB00308
7-ketodeoxycholate	4821	405.265	Lipid	Secondary Bile Acid Metabolism	LC/MS Neg	911-40-0	188292		HMDB00391
deoxycholate	5294	391.285	Lipid	Secondary Bile Acid Metabolism	LC/MS Neg	83-44-3	222528	C04483	HMDB00626
glycocholenate sulfate*	4750	254.623	Lipid	Secondary Bile Acid Metabolism	LC/MS Neg
glycodeoxycholate	5281	448.307	Lipid	Secondary Bile Acid Metabolism	LC/MS Neg	360-65-6	3035026	C05464	HMDB00631
glycodeoxycholate sulfate	4875	263.628	Lipid	Secondary Bile Acid Metabolism	LC/MS Neg
glycohyocholate	5020	464.302	Lipid	Secondary Bile Acid Metabolism	LC/MS Neg
glycolithocholate	5357.1	432.312	Lipid	Secondary Bile Acid Metabolism	LC/MS Neg	474-74-8	115245	C15557	HMDB00698
glycolithocholate sulfate*	5011	255.631	Lipid	Secondary Bile Acid Metabolism	LC/MS Neg	15324-64-8	72222	C11301	HMDB02639
glycoursodeoxycholate	5033	448.307	Lipid	Secondary Bile Acid Metabolism	LC/MS Neg	64480-66-6	12310288		HMDB00708
hyocholate	5046	407.28	Lipid	Secondary Bile Acid Metabolism	LC/MS Neg	547-75-1	92805	C17649	HMDB00760
isoursodeoxycholate	4809	391.285	Lipid	Secondary Bile Acid Metabolism	LC/MS Neg	78919-26-3	127601	C17662	HMDB00686
taurocholenate sulfate*	4750	279.614	Lipid	Secondary Bile Acid Metabolism	LC/MS Neg
taurodeoxycholate	5257.4	498.289	Lipid	Secondary Bile Acid Metabolism	LC/MS Neg	207737-97-1	2733768	C05463	HMDB00896
taurolithocholate	5345	482.295	Lipid	Secondary Bile Acid Metabolism	LC/MS Neg	516-90-5	10595	C02592	HMDB00722
taurolithocholate 3-sulfate	5027	280.622	Lipid	Secondary Bile Acid Metabolism	LC/MS Neg	64936-83-0	440071	C03642	HMDB02580
tauroursodeoxycholate	5025	498.289	Lipid	Secondary Bile Acid Metabolism	LC/MS Neg	14605-22-2	9848818		HMDB00874
ursodeoxycholate	5055	391.285	Lipid	Secondary Bile Acid Metabolism	LC/MS Neg	128-13-2	31401	C07880	HMDB00946
sphingadienine	1350	298.274	Lipid	Sphingolipid Synthesis	LC/MS Pos Late	25696-03-1	6449795
sphinganine	1413	302.305	Lipid	Sphingolipid Synthesis	LC/MS Pos Late	3102-56-5	3126	C00836	HMDB00269
sphinganine-1-phosphate	1431	382.272	Lipid	Sphingolipid Synthesis	LC/MS Pos Late	19794-97-9	520		HMDB01383
behenoyl sphingomyelin (d18:1/22:0)*	3083	787.669	Lipid	Sphingomyelins	LC/MS Pos Late				HMDB12103
lignoceroyl sphingomyelin (d18:1/24:0)	3437	815.7	Lipid	Sphingomyelins	LC/MS Pos Late	60037-60-7
palmitoyl sphingomyelin (d18:1/16:0)	2168	703.575	Lipid	Sphingomyelins	LC/MS Pos Late	6254-89-3	9939941
sphingomyelin (d17:1/14:0, d16:1/15:0)*	1950	661.528	Lipid	Sphingomyelins	LC/MS Pos Late
sphingomyelin (d17:1/16:0, d18:1/15:0, d16:1/17:0)*	2082	689.559	Lipid	Sphingomyelins	LC/MS Pos Late	121999-58-4
sphingomyelin (d17:2/16:0, d18:2/15:0)*	1837	687.544	Lipid	Sphingomyelins	LC/MS Pos Late
sphingomyelin (d18:1/14:0, d16:1/16:0)*	1998	675.544	Lipid	Sphingomyelins	LC/MS Pos Late		11433862		HMDB12097
sphingomyelin (d18:1/17:0, d17:1/18:0, d19:1/16:0)	2312	717.591	Lipid	Sphingomyelins	LC/MS Pos Late	121999-64-2
sphingomyelin (d18:1/18:1, d18:2/18:0)	2167	729.591	Lipid	Sphingomyelins	LC/MS Pos Late	108392-10-5	6443882		HMDB12101
sphingomyelin (d18:1/19:0, d19:1/18:0)*	2330	745.622	Lipid	Sphingomyelins	LC/MS Pos Late
sphingomyelin (d18:1/20:0, d16:1/22:0)*	2685	759.638	Lipid	Sphingomyelins	LC/MS Pos Late				HMDB12102
sphingomyelin (d18:1/20:1, d18:2/20:0)*	2383	757.622	Lipid	Sphingomyelins	LC/MS Pos Late	222403-67-0
sphingomyelin (d18:1/20:2, d18:2/20:1, d16:1/22:2)*	2039	755.606	Lipid	Sphingomyelins	LC/MS Pos Late
sphingomyelin (d18:1/21:0, d17:1/22:0, d16:1/23:0)*	2793	773.653	Lipid	Sphingomyelins	LC/MS Pos Late
sphingomyelin (d18:1/22:1, d18:2/22:0, d16:1/24:1)*	2666	785.653	Lipid	Sphingomyelins	LC/MS Pos Late				HMDB12104
sphingomyelin (d18:1/22:2, d18:2/22:1, d16:1/24:2)*	2209	783.637	Lipid	Sphingomyelins	LC/MS Pos Late
sphingomyelin (d18:1/24:1, d18:2/24:0)*	3033	813.684	Lipid	Sphingomyelins	LC/MS Pos Late	94359-13-4			HMDB12107
sphingomyelin (d18:1/25:0, d19:0/24:1, d20:1/23:0, d19:1/24:0)*	3500	829.716	Lipid	Sphingomyelins	LC/MS Pos Late
sphingomyelin (d18:2/14:0, d18:1/14:1)*	1860	673.528	Lipid	Sphingomyelins	LC/MS Pos Late
sphingomyelin (d18:2/16:0, d18:1/16:1)*	2002	701.559	Lipid	Sphingomyelins	LC/MS Pos Late
sphingomyelin (d18:2/18:1)*	1904	727.575	Lipid	Sphingomyelins	LC/MS Pos Late
sphingomyelin (d18:2/21:0, d16:2/23:0)*	2330	771.637	Lipid	Sphingomyelins	LC/MS Pos Late
sphingomyelin (d18:2/23:0, d18:1/23:1, d17:1/24:1)*	2845	799.669	Lipid	Sphingomyelins	LC/MS Pos Late
sphingomyelin (d18:2/23:1)*	2315	797.653	Lipid	Sphingomyelins	LC/MS Pos Late
sphingomyelin (d18:2/24:1, d18:1/24:2)*	2635	811.669	Lipid	Sphingomyelins	LC/MS Pos Late
sphingomyelin (d18:2/24:2)*	2215	809.653	Lipid	Sphingomyelins	LC/MS Pos Late
stearoyl sphingomyelin (d18:1/18:0)	2400	731.606	Lipid	Sphingomyelins	LC/MS Pos Late	85187-10-6;85187-10-6	6453725	C00550	HMDB01348
tricosanoyl sphingomyelin (d18:1/23:0)*	3200	801.684	Lipid	Sphingomyelins	LC/MS Pos Late				HMDB12105
hexadecasphingosine (d16:1)*	1289	272.258	Lipid	Sphingosines	LC/MS Pos Late
sphingosine	1393	300.29	Lipid	Sphingosines	LC/MS Pos Late	123-78-4	5353955	C00319	HMDB00252
sphingosine 1-phosphate	1375	380.256	Lipid	Sphingosines	LC/MS Pos Late	26993-30-6	5283560	C06124	HMDB00277
3beta,7alpha-dihydroxy-5-cholestenoate	5275	431.317	Lipid	Sterol	LC/MS Neg	115538-84-6	3081084	C17335
3beta-hydroxy-5-cholestenoate	5398	415.322	Lipid	Sterol	LC/MS Neg	6561-58-6	165511	C17333
4-cholesten-3-one	2520	385.346	Lipid	Sterol	LC/MS Pos Late	601-57-0	91477	C00599	HMDB00921
7-HOCA	5288.1	429.301	Lipid	Sterol	LC/MS Neg	115538-85-7	3081085	C17337	HMDB12458
beta-sitosterol	3054	397.383	Lipid	Sterol	LC/MS Pos Late	83-46-5	222284	C01753	HMDB00852
campesterol	2873	383.367	Lipid	Sterol	LC/MS Pos Late	474-62-4	173183	C01789	HMDB02869
cholesterol	2707	369.352	Lipid	Sterol	LC/MS Pos Late	57-88-5	11025495	C00187	HMDB00067
allantoin	1672	157.037	Nucleotide	Purine Metabolism, (Hypo)Xanthine/Inosine containing	LC/MS Polar	97-59-6	204	C02350	HMDB00462
hypoxanthine	1291.2	135.031	Nucleotide	Purine Metabolism, (Hypo)Xanthine/Inosine containing	LC/MS Neg	68-94-0	790	C00262	HMDB00157
inosine	1602.1	267.073	Nucleotide	Purine Metabolism, (Hypo)Xanthine/Inosine containing	LC/MS Neg	58-63-9	6021	C00294	HMDB00195
inosine 5'-monophosphate (IMP)	650	349.054	Nucleotide	Purine Metabolism, (Hypo)Xanthine/Inosine containing	LC/MS Pos Early	4691-65-0	8582	C00130	HMDB00175
N1-methylinosine	1430	283.104	Nucleotide	Purine Metabolism, (Hypo)Xanthine/Inosine containing	LC/MS Pos Early	20245-33-4	65095		HMDB02721
urate	757.1	167.021	Nucleotide	Purine Metabolism, (Hypo)Xanthine/Inosine containing	LC/MS Neg	69-93-2;120K5305	1175	C00366	HMDB00289
xanthine	2023	151.026	Nucleotide	Purine Metabolism, (Hypo)Xanthine/Inosine containing	LC/MS Polar	69-89-6	1188	C00385	HMDB00292
xanthosine	1075	283.068	Nucleotide	Purine Metabolism, (Hypo)Xanthine/Inosine containing	LC/MS Neg	146-80-5	64959	C01762	HMDB00299
1-methyladenosine	2120	282.12	Nucleotide	Purine Metabolism, Adenine containing	LC/MS Pos Early	15763-06-1	27476	C02494	HMDB03331
adenine	1680	134.047	Nucleotide	Purine Metabolism, Adenine containing	LC/MS Neg	73-24-5	190	C00147	HMDB00034
adenosine	2169	268.104	Nucleotide	Purine Metabolism, Adenine containing	LC/MS Pos Early	58-61-7	60961	C00212	HMDB00050
ADP	607	428.037	Nucleotide	Purine Metabolism, Adenine containing	LC/MS Pos Early	20398-34-9	6022	C00008	HMDB01341
AMP	1013	348.07	Nucleotide	Purine Metabolism, Adenine containing	LC/MS Pos Early	149022-20-8	6083	C00020	HMDB00045
N6-carbamoylthreonyladenosine	2164	411.127	Nucleotide	Purine Metabolism, Adenine containing	LC/MS Neg	24719-82-2	161466		HMDB41623
N6-methyladenosine	2264	282.12	Nucleotide	Purine Metabolism, Adenine containing	LC/MS Pos Early	1867-73-8	1869		HMDB04044
N6-succinyladenosine	940	382.1	Nucleotide	Purine Metabolism, Adenine containing	LC/MS Neg	4542-23-8	165243		HMDB00912
7-methylguanine	2175	166.072	Nucleotide	Purine Metabolism, Guanine containing	LC/MS Pos Early	578-76-7	11361	C02242	HMDB00897
guanosine	1662	282.084	Nucleotide	Purine Metabolism, Guanine containing	LC/MS Neg	118-00-3	6802	C00387	HMDB00133
N2,N2-dimethylguanosine	2210	312.13	Nucleotide	Purine Metabolism, Guanine containing	LC/MS Pos Early	2140-67-2	92919		HMDB04824
2'-O-methylcytidine	2411	258.108	Nucleotide	Pyrimidine Metabolism, Cytidine containing	LC/MS Pos Early	2140-72-9	150971
3-methylcytidine	2176	258.108	Nucleotide	Pyrimidine Metabolism, Cytidine containing	LC/MS Pos Early	21028-20-6	159649
CMP	835	324.059	Nucleotide	Pyrimidine Metabolism, Cytidine containing	LC/MS Pos Early	63-37-6	6131	C00055	HMDB00095
cytidine	1325	242.078	Nucleotide	Pyrimidine Metabolism, Cytidine containing	LC/MS Neg	65-46-3	6175	C00475	HMDB00089
dihydroorotate	1910	157.025	Nucleotide	Pyrimidine Metabolism, Orotate containing	LC/MS Polar	155-54-4	648	C00337	HMDB03349
orotate	1638.1	155.01	Nucleotide	Pyrimidine Metabolism, Orotate containing	LC/MS Polar	50887-69-9	967	C00295	HMDB00226
orotidine	2250	287.052	Nucleotide	Pyrimidine Metabolism, Orotate containing	LC/MS Polar	314-50-1	92751		HMDB00788
3-aminoisobutyrate	2190	104.071	Nucleotide	Pyrimidine Metabolism, Thymine containing	LC/MS Pos Early	10569-72-9;214139-20-5	64956	C05145	HMDB03911
5,6-dihydrothymine	1637.8	127.051	Nucleotide	Pyrimidine Metabolism, Thymine containing	LC/MS Neg	696-04-8	93556	C00906	HMDB00079
2'-deoxyuridine	1586	111.02	Nucleotide	Pyrimidine Metabolism, Uracil containing	LC/MS Neg	951-78-0	13712	C00526	HMDB00012
2'-O-methyluridine	1831	257.078	Nucleotide	Pyrimidine Metabolism, Uracil containing	LC/MS Neg	2140-76-3	102212
3-ureidopropionate	875	133.061	Nucleotide	Pyrimidine Metabolism, Uracil containing	LC/MS Pos Early	462-88-4	111	C02642	HMDB00026
5,6-dihydrouracil	1120	113.036	Nucleotide	Pyrimidine Metabolism, Uracil containing	LC/MS Neg	504-07-4	649	C00429	HMDB00076
5,6-dihydrouridine	1119	245.078	Nucleotide	Pyrimidine Metabolism, Uracil containing	LC/MS Neg	5627-05-04	94312
5-methyluridine (ribothymidine)	1778.1	257.078	Nucleotide	Pyrimidine Metabolism, Uracil containing	LC/MS Neg	1463-10-1	445408		HMDB00884
beta-alanine	1905	90.055	Nucleotide	Pyrimidine Metabolism, Uracil containing	LC/MS Pos Early	56-41-7;107-95-9	239	C00099	HMDB00056
N-acetyl-beta-alanine	773	130.051	Nucleotide	Pyrimidine Metabolism, Uracil containing	LC/MS Neg	3025-95-4	76406	C01073
pseudouridine	1100	243.062	Nucleotide	Pyrimidine Metabolism, Uracil containing	LC/MS Neg	1445-07-4	15047	C02067	HMDB00767
uracil	1086	111.02	Nucleotide	Pyrimidine Metabolism, Uracil containing	LC/MS Neg	66-22-8	1174	C00106	HMDB00300
uridine	1457.6	243.062	Nucleotide	Pyrimidine Metabolism, Uracil containing	LC/MS Neg	58-96-8	6029	C00299	HMDB00296
glucuronide of C10H18O2 (1)*	2728	345.156	Partially Characterized Molecules	Partially Characterized Molecules	LC/MS Neg
glucuronide of C10H18O2 (7)*	3790	345.156	Partially Characterized Molecules	Partially Characterized Molecules	LC/MS Neg
glucuronide of C10H18O2 (8)*	3865	345.156	Partially Characterized Molecules	Partially Characterized Molecules	LC/MS Neg
glucuronide of C14H22O4 (2)*	3932	429.177	Partially Characterized Molecules	Partially Characterized Molecules	LC/MS Neg
glucuronide of C19H28O4 (1)*	3400	495.224	Partially Characterized Molecules	Partially Characterized Molecules	LC/MS Neg
glucuronide of C8H14O2 (3)*	3791	317.124	Partially Characterized Molecules	Partially Characterized Molecules	LC/MS Neg
glucuronide of C8H16O2 (1)*	4125	319.14	Partially Characterized Molecules	Partially Characterized Molecules	LC/MS Neg
glycine conjugate of C10H14O2 (1)*	4335	222.114	Partially Characterized Molecules	Partially Characterized Molecules	LC/MS Neg
4-hydroxyphenylacetylglutamine	1650	279.099	Peptide	Acetylated Peptides	LC/MS Neg
phenylacetylcarnitine	3092	280.154	Peptide	Acetylated Peptides	LC/MS Pos Early	287108-21-8	101724840
phenylacetylglutamate	1630	264.088	Peptide	Acetylated Peptides	LC/MS Neg		11579826		HMDB59772
phenylacetylglutamine	2330	263.104	Peptide	Acetylated Peptides	LC/MS Neg	28047-15-6	92258	C04148	HMDB06344
phenylacetylhistidine	2909	274.119	Peptide	Acetylated Peptides	LC/MS Pos Early
phenylacetylmethionine	3620	266.086	Peptide	Acetylated Peptides	LC/MS Neg
glycylvaline	2734	175.108	Peptide	Dipeptide	LC/MS Pos Early	1963-21-9	97417		HMDB28854
histidylalanine	970	225.099	Peptide	Dipeptide	LC/MS Neg	16874-75-2	351667		HMDB28878
isoleucylglycine	1992	187.109	Peptide	Dipeptide	LC/MS Neg	868-28-0	342532		HMDB28907
prolylglycine	2136	173.092	Peptide	Dipeptide	LC/MS Pos Early	2578-57-6	6426709		HMDB11178
valylglycine	1506	173.093	Peptide	Dipeptide	LC/MS Neg	686-43-1	136487		HMDB29127
ADpSGEGDFXAEGGGVR*	2016	806.818	Peptide	Fibrinogen Cleavage Peptide	LC/MS Neg	886023-52-5
ADSGEGDFXAEGGGVR*	2474	766.835	Peptide	Fibrinogen Cleavage Peptide	LC/MS Neg	25422-31-5	16133137
DSGEGDFXAEGGGVR*	2535	731.317	Peptide	Fibrinogen Cleavage Peptide	LC/MS Neg
gamma-glutamyl-2-aminobutyrate	2380	233.113	Peptide	Gamma-glutamyl Amino Acid	LC/MS Pos Early	16869-42-4
gamma-glutamyl-alpha-lysine	2784	276.155	Peptide	Gamma-glutamyl Amino Acid	LC/MS Pos Early		65254
gamma-glutamylcitrulline*	1644	305.146	Peptide	Gamma-glutamyl Amino Acid	LC/MS Pos Early
gamma-glutamyl-epsilon-lysine	2717	276.155	Peptide	Gamma-glutamyl Amino Acid	LC/MS Pos Early	17105-15-6	7015685		HMDB03869
gamma-glutamylglutamate	1775	277.103	Peptide	Gamma-glutamyl Amino Acid	LC/MS Pos Early	1116-22-9	92865	C05282	HMDB11737
gamma-glutamylglutamine	1430	276.119	Peptide	Gamma-glutamyl Amino Acid	LC/MS Pos Early	10148-81-9	150914	C05283	HMDB11738
gamma-glutamylglycine	1535	205.082	Peptide	Gamma-glutamyl Amino Acid	LC/MS Pos Early	1948-29-4	165527		HMDB11667
gamma-glutamylhistidine	2740	285.119	Peptide	Gamma-glutamyl Amino Acid	LC/MS Pos Early	37460-15-4	7017195
gamma-glutamylisoleucine*	2940	261.144	Peptide	Gamma-glutamyl Amino Acid	LC/MS Pos Early		14253342		HMDB11170
gamma-glutamylleucine	2991	261.144	Peptide	Gamma-glutamyl Amino Acid	LC/MS Pos Early	2566-39-4	151023		HMDB11171
gamma-glutamylmethionine	2640	279.101	Peptide	Gamma-glutamyl Amino Acid	LC/MS Pos Early	17663-87-5	7009567		HMDB29155
gamma-glutamylphenylalanine	2992	295.129	Peptide	Gamma-glutamyl Amino Acid	LC/MS Pos Early	7432-24-8	111299		HMDB00594
gamma-glutamylthreonine	1750	249.108	Peptide	Gamma-glutamyl Amino Acid	LC/MS Pos Early	5652-48-2	76078708		HMDB29159
gamma-glutamyltryptophan	2975	334.14	Peptide	Gamma-glutamyl Amino Acid	LC/MS Pos Early	66471-20-3	3989307		HMDB29160
gamma-glutamyltyrosine	1240	309.109	Peptide	Gamma-glutamyl Amino Acid	LC/MS Neg	7432-23-7	94340		HMDB11741
gamma-glutamylvaline	2700	247.129	Peptide	Gamma-glutamyl Amino Acid	LC/MS Pos Early	2746-34-1	7015683		HMDB11172
HWESASLLR	4053	547.774	Peptide	Polypeptide	LC/MS Neg
HWESASXX*	3722	940.453	Peptide	Polypeptide	LC/MS Neg
1H-indole-7-acetic acid	2862	174.056	Xenobiotics	Bacterial/Fungal	LC/MS Neg	39689-63-9
N-methylpipecolate	1932	144.102	Xenobiotics	Bacterial/Fungal	LC/MS Pos Early	41447-17-0	11286529
tartronate (hydroxymalonate)	610	118.999	Xenobiotics	Bacterial/Fungal	LC/MS Neg	80-69-3	45	C02287	HMDB35227
2-hydroxyhippurate (salicylurate)	2184	194.046	Xenobiotics	Benzoate Metabolism	LC/MS Neg	487-54-7	10253	C07588	HMDB00840
3-(3-hydroxyphenyl)propionate	1980	165.056	Xenobiotics	Benzoate Metabolism	LC/MS Neg	621-54-5	91	C11457	HMDB00375
3-(3-hydroxyphenyl)propionate sulfate	1294	245.013	Xenobiotics	Benzoate Metabolism	LC/MS Neg	86321-32-6	187488
3-hydroxyhippurate	1687	194.046	Xenobiotics	Benzoate Metabolism	LC/MS Neg	1637-75-8	450268		HMDB06116
3-methoxycatechol sulfate (1)	2163	218.997	Xenobiotics	Benzoate Metabolism	LC/MS Neg
3-methoxycatechol sulfate (2)	2200	218.997	Xenobiotics	Benzoate Metabolism	LC/MS Neg
3-methyl catechol sulfate (1)	2790	203.002	Xenobiotics	Benzoate Metabolism	LC/MS Neg
3-phenylpropionate (hydrocinnamate)	2860	149.061	Xenobiotics	Benzoate Metabolism	LC/MS Neg	501-52-0	107	C05629	HMDB00764
4-acetylphenyl sulfate	2375	215.002	Xenobiotics	Benzoate Metabolism	LC/MS Neg		4684006
4-ethylphenyl sulfate	3580	201.023	Xenobiotics	Benzoate Metabolism	LC/MS Neg	123-07-9		C13637
4-hydroxyhippurate	1475	194.046	Xenobiotics	Benzoate Metabolism	LC/MS Neg	2482-25-9	151012		HMDB13678
4-methylcatechol sulfate	2665	203.002	Xenobiotics	Benzoate Metabolism	LC/MS Neg
4-methylguaiacol sulfate	2978	217.018	Xenobiotics	Benzoate Metabolism	LC/MS Neg	756760-43-7
4-vinylphenol sulfate	3320	199.007	Xenobiotics	Benzoate Metabolism	LC/MS Neg	2628-17-3	6426766	C05627	HMDB04072
benzoate	1750	121.029	Xenobiotics	Benzoate Metabolism	LC/MS Neg	65-85-0	243	C00180	HMDB01870
catechol sulfate	1906	188.986	Xenobiotics	Benzoate Metabolism	LC/MS Neg	4918-96-1	3083879		HMDB59724
guaiacol sulfate	2344	203.002	Xenobiotics	Benzoate Metabolism	LC/MS Neg		22473		HMDB60013
hippurate	2106.9	178.051	Xenobiotics	Benzoate Metabolism	LC/MS Neg	495-69-2	464	C01586	HMDB00714
methyl-4-hydroxybenzoate sulfate	2873	230.997	Xenobiotics	Benzoate Metabolism	LC/MS Neg
o-cresol sulfate	2796	187.007	Xenobiotics	Benzoate Metabolism	LC/MS Neg		11615528
p-cresol sulfate	2890	187.007	Xenobiotics	Benzoate Metabolism	LC/MS Neg	3233-57-7	4615423		HMDB11635
propyl 4-hydroxybenzoate sulfate	3971	259.028	Xenobiotics	Benzoate Metabolism	LC/MS Neg	162338-10-5
1,2,3-benzenetriol sulfate (2)	1709	204.981	Xenobiotics	Chemical	LC/MS Neg
2-aminophenol sulfate	1677	188.002	Xenobiotics	Chemical	LC/MS Neg		181670		HMDB61116
2-methoxyresorcinol sulfate	1863	218.997	Xenobiotics	Chemical	LC/MS Neg	1446269-78-8
3-acetylphenol sulfate	2477	215.002	Xenobiotics	Chemical	LC/MS Neg
3-hydroxypyridine sulfate	1595.5	173.987	Xenobiotics	Chemical	LC/MS Neg	1955-23-3
4-hydroxychlorothalonil	4427	244.908	Xenobiotics	Chemical	LC/MS Neg	28343-61-5	34217
6-hydroxyindole sulfate	2498	212.002	Xenobiotics	Chemical	LC/MS Neg
diethanolamine	1960	106.086	Xenobiotics	Chemical	LC/MS Pos Early	111-42-2	8113	C06772	HMDB04437
diglycerol	818	167.091	Xenobiotics	Chemical	LC/MS Pos Early	627-82-7	42953
dimethyl sulfone	832	95.0161	Xenobiotics	Chemical	LC/MS Pos Early	67-71-0	6213	C11142	HMDB04983
ectoine	1980	143.082	Xenobiotics	Chemical	LC/MS Pos Early	96702-03-3	126041	C06231
EDTA	643	291.083	Xenobiotics	Chemical	LC/MS Neg	60-00-4	6049	C00284	HMDB15109
ethyl glucuronide	793	221.067	Xenobiotics	Chemical	LC/MS Neg	17685-04-0	152226		HMDB10325
iminodiacetate (IDA)	830	134.045	Xenobiotics	Chemical	LC/MS Pos Early	142-73-4	8897	C19911	HMDB11753
indoleacetylcarnitine*	3114	319.165	Xenobiotics	Chemical	LC/MS Pos Early
O-sulfo-L-tyrosine	990	260.023	Xenobiotics	Chemical	LC/MS Neg		514186
perfluorooctanesulfonate (PFOS)	5233	498.93	Xenobiotics	Chemical	LC/MS Neg	1763-23-1	74483	C18142	HMDB59586
perfluorooctanoate (PFOA)*	5130	412.966	Xenobiotics	Chemical	LC/MS Neg		9554		HMDB59587
succinimide	2155	116.035	Xenobiotics	Chemical	LC/MS Polar	123-56-8	11439	C07273
sulfate*	616	96.9601	Xenobiotics	Chemical	LC/MS Neg	14808-79-8	1118	C00059	HMDB01448
thioproline	1250	134.027	Xenobiotics	Chemical	LC/MS Pos Early	34592-47-4	93176
trizma acetate	1884	122.081	Xenobiotics	Chemical	LC/MS Pos Early	6850-28-8	6503	C07182
2-hydroxyacetaminophen sulfate*	1674	246.008	Xenobiotics	Drug - Analgesics, Anesthetics	LC/MS Neg		86290013
2-hydroxyibuprofen	3462	221.118	Xenobiotics	Drug - Analgesics, Anesthetics	LC/MS Neg	51146-55-5	10443535		HMDB60920
2-methoxyacetaminophen glucuronide*	1633	356.099	Xenobiotics	Drug - Analgesics, Anesthetics	LC/MS Neg		14367271
2-methoxyacetaminophen sulfate*	1949	260.023	Xenobiotics	Drug - Analgesics, Anesthetics	LC/MS Neg		86290014
3-(cystein-S-yl)acetaminophen*	2420	271.075	Xenobiotics	Drug - Analgesics, Anesthetics	LC/MS Pos Early		5233914
3-(N-acetyl-L-cystein-S-yl) acetaminophen	2094	311.071	Xenobiotics	Drug - Analgesics, Anesthetics	LC/MS Neg	52372-86-8	83967
4-acetamidophenol	2173.7	150.056	Xenobiotics	Drug - Analgesics, Anesthetics	LC/MS Neg	103-90-2	1983	C06804	HMDB01859
4-acetamidophenylglucuronide	1400	326.088	Xenobiotics	Drug - Analgesics, Anesthetics	LC/MS Neg	120595-80-4	83944		HMDB10316
4-acetaminophen sulfate	1792	230.013	Xenobiotics	Drug - Analgesics, Anesthetics	LC/MS Neg	10066-90-7;32113-41-0	83939	C06804	HMDB59911
4-aminophenol sulfate (2)	1168	188.002	Xenobiotics	Drug - Analgesics, Anesthetics	LC/MS Neg
carboxyibuprofen	1920	235.098	Xenobiotics	Drug - Analgesics, Anesthetics	LC/MS Neg	15935-54-3	10444113		HMDB60564
desmethylnaproxen	3045	215.071	Xenobiotics	Drug - Analgesics, Anesthetics	LC/MS Neg	52079-10-4	13393711		HMDB13989
desmethylnaproxen sulfate	2250	295.028	Xenobiotics	Drug - Analgesics, Anesthetics	LC/MS Neg		184679
diclofenac	1222	296.024	Xenobiotics	Drug - Analgesics, Anesthetics	LC/MS Pos Late	15307-86-5		C01690	HMDB14724
ibuprofen	4925	205.123	Xenobiotics	Drug - Analgesics, Anesthetics	LC/MS Neg	15687-27-1	3672	D00126	HMDB01925
ibuprofen acyl glucuronide	4976	381.155	Xenobiotics	Drug - Analgesics, Anesthetics	LC/MS Neg	115075-59-7	163959
lidocaine	746	235.18	Xenobiotics	Drug - Analgesics, Anesthetics	LC/MS Pos Late	137-58-6	3676	D00358	HMDB14426
morphine	2591	286.144	Xenobiotics	Drug - Analgesics, Anesthetics	LC/MS Pos Early	57-27-2	5288826	C01516	HMDB14440
morphine-3-glucuronide	2495	460.161	Xenobiotics	Drug - Analgesics, Anesthetics	LC/MS Neg		5484731	C16643	HMDB41936
morphine-6-glucuronide	3077	460.161	Xenobiotics	Drug - Analgesics, Anesthetics	LC/MS Neg		5360621	C16578	HMDB41937
naproxen	4155	229.087	Xenobiotics	Drug - Analgesics, Anesthetics	LC/MS Neg	22204-53-1	156391	C01517	HMDB01923
N-desmethyl tramadol	3360	250.18	Xenobiotics	Drug - Analgesics, Anesthetics	LC/MS Pos Early	147762-57-0	10354700		HMDB61007
N-ethylglycinexylidide	3209	207.149	Xenobiotics	Drug - Analgesics, Anesthetics	LC/MS Pos Early	7728-40-7	24415	C16561	HMDB60656
O-desmethyltramadol	3045	250.18	Xenobiotics	Drug - Analgesics, Anesthetics	LC/MS Pos Early	73986-53-5	130829		HMDB60997
O-desmethyltramadol glucuronide	2741	426.212	Xenobiotics	Drug - Analgesics, Anesthetics	LC/MS Pos Early	383891-39-2
salicyluric glucuronide*	1463	370.078	Xenobiotics	Drug - Analgesics, Anesthetics	LC/MS Neg
tramadol	3288	264.196	Xenobiotics	Drug - Analgesics, Anesthetics	LC/MS Pos Early	27203-92-5	33741	C07153	HMDB14339
amoxicillin	2365	364.097	Xenobiotics	Drug - Antibiotic	LC/MS Neg	26787-78-0	2171	C06827	HMDB15193
azithromycin	918	749.516	Xenobiotics	Drug - Antibiotic	LC/MS Pos Late	83905-01-5	2269	C06838	HMDB14352
cefazolin	2266	455.037	Xenobiotics	Drug - Antibiotic	LC/MS Pos Early	27614-46-1	33255	D00905,C06880,D02299	HMDB15422
ceftazidime	1816	545.092	Xenobiotics	Drug - Antibiotic	LC/MS Neg	78439-06-2	5481173	D07654,C06889	HMDB14582
ciprofloxacin	2724	392.126	Xenobiotics	Drug - Antibiotic	LC/MS Neg	85721-33-1	4011971;2764	C05349
clindamycin	848	425.187	Xenobiotics	Drug - Antibiotic	LC/MS Pos Late	18323-44-9	446598	D00277,C06914
doxycycline	829	445.161	Xenobiotics	Drug - Antibiotic	LC/MS Pos Late	24390-14-5
fluconazole	2731	307.111	Xenobiotics	Drug - Antibiotic	LC/MS Pos Early	86386-73-4	3365	D00322	HMDB14342
linezolid	2732	338.151	Xenobiotics	Drug - Antibiotic	LC/MS Pos Early	165800-03-3	441401	C08146,D00947	HMDB14739
meropenem	2468	382.144	Xenobiotics	Drug - Antibiotic	LC/MS Neg	96036-03-2	441130	D08185	HMDB14898
metronidazole	2046	172.072	Xenobiotics	Drug - Antibiotic	LC/MS Pos Early	73334-05-1	4173	D00409	HMDB15052
moxifloxacin	3272	402.182	Xenobiotics	Drug - Antibiotic	LC/MS Pos Early	186826-86-8	152946	D08237	HMDB14363
ofloxacin	3600	360.137	Xenobiotics	Drug - Antibiotic	LC/MS Neg	82419-36-1	4583	C07321	HMDB01929
penicillin G	3855	333.091	Xenobiotics	Drug - Antibiotic	LC/MS Neg	69-57-8	5904	C05551	HMDB15186
mycophenolic acid	4185	319.119	Xenobiotics	Drug - Antiinflammatory, Immunosuppressant	LC/MS Neg	24280-93-1	446541	C20380,D05096	HMDB15159
mycophenolic acid glucuronide	2627	495.151	Xenobiotics	Drug - Antiinflammatory, Immunosuppressant	LC/MS Neg		6442661
prednisolone	4701	359.186	Xenobiotics	Drug - Antiinflammatory, Immunosuppressant	LC/MS Neg		5755	C07369,D00472	HMDB14998
alpha-hydroxymetoprolol	2900	284.186	Xenobiotics	Drug - Cardiovascular	LC/MS Pos Early	56392-16-6	114962		HMDB60994
atenolol	2668	267.17	Xenobiotics	Drug - Cardiovascular	LC/MS Pos Early	29122-68-7	2249	D00235	HMDB01924
candesartan	3436	439.152	Xenobiotics	Drug - Cardiovascular	LC/MS Neg	139481-59-7	2541	D00522,C07468	HMDB14934
furosemide	3515	329	Xenobiotics	Drug - Cardiovascular	LC/MS Neg	54-31-9	3440	D00331	HMDB01933
hydrochlorothiazide	2046	295.957	Xenobiotics	Drug - Cardiovascular	LC/MS Neg	58-93-5	3639	C07041	HMDB01928
lisinopril	2617	404.219	Xenobiotics	Drug - Cardiovascular	LC/MS Neg	76547-98-3	3937
metoprolol	760	268.191	Xenobiotics	Drug - Cardiovascular	LC/MS Pos Late	56392-17-7	4171	D02358	HMDB01932
metoprolol acid metabolite*	2950	268.154	Xenobiotics	Drug - Cardiovascular	LC/MS Pos Early	56392-14-4	62936
milrinone*	2885	210.067	Xenobiotics	Drug - Cardiovascular	LC/MS Neg
valsartan	4228	434.22	Xenobiotics	Drug - Cardiovascular	LC/MS Neg	137862-53-4	5650
verapamil	945	455.29	Xenobiotics	Drug - Cardiovascular	LC/MS Pos Late	152-11-4	2520	D02356	HMDB01850
famotidine	2718	338.052	Xenobiotics	Drug - Gastrointestinal	LC/MS Pos Early	76824-35-6	5702160	D00318	HMDB01919
metoclopramide	3091	300.147	Xenobiotics	Drug - Gastrointestinal	LC/MS Pos Early	364-62-5	4168	C07868,D00726	HMDB15363
omeprazole	4673	344.107	Xenobiotics	Drug - Gastrointestinal	LC/MS Neg	73590-58-6	4594	C07324	HMDB01913
ondansetron	760	294.16	Xenobiotics	Drug - Gastrointestinal	LC/MS Pos Late	99614-02-5	4595	C07325,D00456	HMDB05035
pantoprazole	4398	382.068	Xenobiotics	Drug - Gastrointestinal	LC/MS Neg	102625-70-7	4679	C11806	HMDB05017
ranitidine	2910	315.149	Xenobiotics	Drug - Gastrointestinal	LC/MS Pos Early	66357-59-3	3001055	D00422	HMDB01930
allopurinol	1530	135.031	Xenobiotics	Drug - Metabolic	LC/MS Neg	315-30-0	2094
allopurinol riboside	1660	267.073	Xenobiotics	Drug - Metabolic	LC/MS Neg	16220-07-8
atorvastatin (lipitor)	5101	557.246	Xenobiotics	Drug - Metabolic	LC/MS Neg	134523-03-8	60823	D00887	HMDB05006
atorvastatin lactone	1190	541.25	Xenobiotics	Drug - Metabolic	LC/MS Pos Late	125995-03-1	6483036
hydroxypioglitazone (M-IV)	665	373.122	Xenobiotics	Drug - Metabolic	LC/MS Pos Late	146062-44-4
metformin	2817	130.109	Xenobiotics	Drug - Metabolic	LC/MS Pos Early	1115-70-4	4091	C07151	HMDB01921
o-hydroxyatorvastatin	5015	573.241	Xenobiotics	Drug - Metabolic	LC/MS Neg	214217-86-4	9808225
o-hydroxyatorvastatin lactone	1145	557.245	Xenobiotics	Drug - Metabolic	LC/MS Pos Late
oxypurinol	1171	151.026	Xenobiotics	Drug - Metabolic	LC/MS Neg	2465-59-0	4644	D02365	HMDB00786
p-hydroxyatorvastatin	940	575.255	Xenobiotics	Drug - Metabolic	LC/MS Pos Late	265989-44-4	9851106
p-hydroxyatorvastatin lactone	990	557.245	Xenobiotics	Drug - Metabolic	LC/MS Pos Late
2-propyl-2-pentenoate (2-ene-valproate)	3874	141.092	Xenobiotics	Drug - Neurological	LC/MS Neg	60218-41-9	6437068	C16653	HMDB13902
2-propyl-4-pentenoate (4-ene-valproate)	3436	141.092	Xenobiotics	Drug - Neurological	LC/MS Neg	1575-72-0	104896
3-hydroxyvalproate	2912	159.103	Xenobiotics	Drug - Neurological	LC/MS Neg	58888-84-9	134459	C16651	HMDB13899
carbamazepine	880	237.102	Xenobiotics	Drug - Neurological	LC/MS Pos Late	298-46-4	2554	D00252	HMDB14704
carbamazepine 10,11-epoxide*	3020	253.097	Xenobiotics	Drug - Neurological	LC/MS Pos Early	36507-30-9	2555	C07496	HMDB60658
carbamazepine glucuronide*	3884	411.12	Xenobiotics	Drug - Neurological	LC/MS Neg
gabapentin	2407.4	170.119	Xenobiotics	Drug - Neurological	LC/MS Neg	60142-96-3	3446	D00332	HMDB05015
homoveratric acid	2342	195.066	Xenobiotics	Drug - Neurological	LC/MS Neg	93-40-3	7139		HMDB00434
lamotrigine	3379	256.015	Xenobiotics	Drug - Neurological	LC/MS Pos Early		3878	D00354	HMDB14695,HMDB05043
levetiracetam	1925	171.113	Xenobiotics	Drug - Neurological	LC/MS Pos Early	102767-28-2	5284583	D00709,C07841
pregabalin	3123	160.133	Xenobiotics	Drug - Neurological	LC/MS Pos Early	148553-50-8	4715169
pyridostigmine	2517	181.097	Xenobiotics	Drug - Neurological	LC/MS Pos Early	155-97-5
rocuronium	754	529.4	Xenobiotics	Drug - Neurological	LC/MS Pos Late	143558-00-3	9849870
valproate (2-propylpentanoate)	3885.6	143.108	Xenobiotics	Drug - Neurological	LC/MS Neg	99-66-1	3121	C07185	HMDB01877
1-hydroxy-2-naphthalenecarboxylate	3930	187.04	Xenobiotics	Drug - Other	LC/MS Neg	86-48-6	6844	C03203
fosfomycin	626	137.001	Xenobiotics	Drug - Other	LC/MS Neg	26016-99-9	3417
S-carboxymethyl-L-cysteine	1490	180.033	Xenobiotics	Drug - Other	LC/MS Pos Early	638-23-3	1080	C03727	HMDB29415
escitalopram	908	325.171	Xenobiotics	Drug - Psychoactive	LC/MS Pos Late	219861-08-2	146570	D07913	HMDB05028
fluoxetine	1025	310.141	Xenobiotics	Drug - Psychoactive	LC/MS Pos Late	59333-67-4	3386	D00326
hydroxybupropion	5084	254.095	Xenobiotics	Drug - Psychoactive	LC/MS Neg		446		HMDB12235
O-desmethylvenlafaxine	3253	264.196	Xenobiotics	Drug - Psychoactive	LC/MS Pos Early	300827-87-6	125017	D07793	HMDB60532
paroxetine	963	330.15	Xenobiotics	Drug - Psychoactive	LC/MS Pos Late	110429-49-8	43815	D02362,C07415
quetiapine	874	384.174	Xenobiotics	Drug - Psychoactive	LC/MS Pos Late	111974-69-7	5002	C07397	HMDB05021
trazadone	3498	372.159	Xenobiotics	Drug - Psychoactive	LC/MS Pos Early	19794-93-5	5533	C07156,D08626	HMDB14794
venlafaxine	848	278.211	Xenobiotics	Drug - Psychoactive	LC/MS Pos Late	93413-69-5	5656	C07187	HMDB05016
cetirizine	1052	389.163	Xenobiotics	Drug - Respiratory	LC/MS Pos Late	83881-51-0	2678	C07778	HMDB05032
pseudoephedrine	3041	166.123	Xenobiotics	Drug - Respiratory	LC/MS Pos Early	90-82-4	7028	C02765	HMDB01943
hydroquinone sulfate	1395	188.986	Xenobiotics	Drug - Topical Agents	LC/MS Neg	123-31-9	161220	C00530	HMDB02434
salicylate	2195	137.024	Xenobiotics	Drug - Topical Agents	LC/MS Neg	69-72-7	338	C00805	HMDB01895
1-kestose	1054	503.162	Xenobiotics	Food Component/Plant	LC/MS Neg	470-69-9	440080	C03661	HMDB11729
2,3-dihydroxyisovalerate	1050	133.051	Xenobiotics	Food Component/Plant	LC/MS Polar	1756-18-9	677	C04039	HMDB12141
2,8-quinolinediol sulfate	2612	239.997	Xenobiotics	Food Component/Plant	LC/MS Neg
2-keto-3-deoxy-gluconate	1900	177.04	Xenobiotics	Food Component/Plant	LC/MS Polar	17510-99-5	161227	C00204	HMDB01353
3-hydroxystachydrine*	1049	160.097	Xenobiotics	Food Component/Plant	LC/MS Pos Early		442640
4-allylphenol sulfate	3805	213.023	Xenobiotics	Food Component/Plant	LC/MS Neg
4-ethylphenol glucuronide	3167	297.098	Xenobiotics	Food Component/Plant	LC/MS Neg
4-vinylguaiacol sulfate	3354	229.018	Xenobiotics	Food Component/Plant	LC/MS Neg
acesulfame	1581	161.987	Xenobiotics	Food Component/Plant	LC/MS Neg	55589-62-3	36573		HMDB33585
alliin	1470	178.053	Xenobiotics	Food Component/Plant	LC/MS Pos Early	556-27-4	87310	C08265	HMDB33592
beta-guanidinopropanoate	2145	132.077	Xenobiotics	Food Component/Plant	LC/MS Pos Early	353-09-3	67701	C03065	HMDB13222
cinnamoylglycine	3127	204.067	Xenobiotics	Food Component/Plant	LC/MS Neg	16534-24-0	709625		HMDB11621
daidzein sulfate (2)	3330	333.008	Xenobiotics	Food Component/Plant	LC/MS Neg
dihydroferulic acid	1928	195.066	Xenobiotics	Food Component/Plant	LC/MS Neg	1135-23-5	14340
equol sulfate	3630	321.044	Xenobiotics	Food Component/Plant	LC/MS Neg
ergothioneine	850	230.096	Xenobiotics	Food Component/Plant	LC/MS Pos Early	58511-63-0	3032311	C05570	HMDB03045
erythritol	1491	167.056	Xenobiotics	Food Component/Plant	LC/MS Polar	149-32-6	222285	C00503	HMDB02994
eugenol sulfate	3782	243.033	Xenobiotics	Food Component/Plant	LC/MS Neg	95480-60-7	180632
ferulic acid 4-sulfate	1200	273.007	Xenobiotics	Food Component/Plant	LC/MS Neg	86321-29-1	6305574		HMDB29200
genistein sulfate*	3616	349.002	Xenobiotics	Food Component/Plant	LC/MS Neg
gluconate	2922	195.051	Xenobiotics	Food Component/Plant	LC/MS Polar	527-07-1	10690	C00257	HMDB00625
glucuronide of piperine metabolite C17H21NO3 (3)*	3951	462.177	Xenobiotics	Food Component/Plant	LC/MS Neg
glucuronide of piperine metabolite C17H21NO3 (4)*	3992	462.177	Xenobiotics	Food Component/Plant	LC/MS Neg
glucuronide of piperine metabolite C17H21NO3 (5)*	4039	462.177	Xenobiotics	Food Component/Plant	LC/MS Neg
homostachydrine*	1750	158.118	Xenobiotics	Food Component/Plant	LC/MS Pos Early	1195-94-4	441447	C08283	HMDB33433
indolin-2-one	2575	134.06	Xenobiotics	Food Component/Plant	LC/MS Pos Early	59-48-3	321710	C12312
methyl glucopyranoside (alpha + beta)	1070	193.072	Xenobiotics	Food Component/Plant	LC/MS Neg
methyl indole-3-acetate	4548	188.072	Xenobiotics	Food Component/Plant	LC/MS Neg	1912-33-0	74706		HMDB29738
N-(2-furoyl)glycine	1525	168.03	Xenobiotics	Food Component/Plant	LC/MS Neg	5657-19-2;5657-19-2	21863		HMDB00439
N-acetylalliin	1348	220.064	Xenobiotics	Food Component/Plant	LC/MS Pos Early
naringenin 7-glucuronide	3144	447.093	Xenobiotics	Food Component/Plant	LC/MS Neg
phytanate	5908	311.296	Xenobiotics	Food Component/Plant	LC/MS Neg	14721-66-5	26840	C01607	HMDB00801
piperine	1168	286.144	Xenobiotics	Food Component/Plant	LC/MS Pos Late	94-62-2	638024	C03882	HMDB29377
pyrraline	2750	255.134	Xenobiotics	Food Component/Plant	LC/MS Pos Early	74509-14-1	122228		HMDB33143
quinate	2432.9	191.056	Xenobiotics	Food Component/Plant	LC/MS Polar	77-95-2	6508	C00296	HMDB03072
saccharin	2000	181.992	Xenobiotics	Food Component/Plant	LC/MS Neg	81-07-2	5143	D01085	HMDB29723
S-allylcysteine	2690	162.058	Xenobiotics	Food Component/Plant	LC/MS Pos Early	21593-77-1	98280		HMDB34323
stachydrine	1440	144.102	Xenobiotics	Food Component/Plant	LC/MS Pos Early	4136-37-2	115244	C10172	HMDB04827
sulfate of piperine metabolite C16H19NO3 (2)*	4112	352.086	Xenobiotics	Food Component/Plant	LC/MS Neg
sulfate of piperine metabolite C16H19NO3 (3)*	4200	352.086	Xenobiotics	Food Component/Plant	LC/MS Neg
sulfate of piperine metabolite C18H21NO3 (1)*	4481	378.102	Xenobiotics	Food Component/Plant	LC/MS Neg
tartarate	615.3	149.009	Xenobiotics	Food Component/Plant	LC/MS Neg	87-69-4;6106-24-7	444305	C00898	HMDB00956
thymol sulfate	4410	229.054	Xenobiotics	Food Component/Plant	LC/MS Neg	89-83-8		C09908	HMDB01878
umbelliferone sulfate	2440	240.981	Xenobiotics	Food Component/Plant	LC/MS Neg	69526-88-1	129659
3-hydroxycotinine glucuronide	1745	367.115	Xenobiotics	Tobacco Metabolite	LC/MS Neg	132929-88-5	183115		HMDB01204
cotinine	2213	177.102	Xenobiotics	Tobacco Metabolite	LC/MS Pos Early	486-56-6	854019		HMDB01046
cotinine N-oxide	1377	193.097	Xenobiotics	Tobacco Metabolite	LC/MS Pos Early	36508-80-2	9815514		HMDB01411
hydroxycotinine	2030	193.097	Xenobiotics	Tobacco Metabolite	LC/MS Pos Early	34834-67-8	10219774		HMDB01390
norcotinine	2156	163.087	Xenobiotics	Tobacco Metabolite	LC/MS Pos Early	17114-40-8	413		HMDB01297
1,3,7-trimethylurate	1985	209.068	Xenobiotics	Xanthine Metabolism	LC/MS Neg	5415-44-1	79437	C16361	HMDB02123
1,3-dimethylurate	1671.4	195.052	Xenobiotics	Xanthine Metabolism	LC/MS Neg	944-73-0	70346		HMDB01857
1,7-dimethylurate	1578.6	195.052	Xenobiotics	Xanthine Metabolism	LC/MS Neg	33868-03-0	91611	C16356	HMDB11103
1-methylurate	1461	183.051	Xenobiotics	Xanthine Metabolism	LC/MS Pos Early	708-79-2	69726	C16359	HMDB03099
1-methylxanthine	1568.8	165.042	Xenobiotics	Xanthine Metabolism	LC/MS Neg	6136-37-4	80220	C16358	HMDB10738
3,7-dimethylurate	1418.2	195.052	Xenobiotics	Xanthine Metabolism	LC/MS Neg	13087-49-5	83126	C16360	HMDB01982
3-methylxanthine	1700	165.042	Xenobiotics	Xanthine Metabolism	LC/MS Neg	1076-22-8	70639	C16357	HMDB01886
5-acetylamino-6-amino-3-methyluracil	1710	197.068	Xenobiotics	Xanthine Metabolism	LC/MS Polar	1196153-01-1	88299	C16366	HMDB04400
5-acetylamino-6-formylamino-3-methyluracil	1424	225.063	Xenobiotics	Xanthine Metabolism	LC/MS Polar	85438-96-6	108214	C16365	HMDB11105
7-methylurate	1321	183.051	Xenobiotics	Xanthine Metabolism	LC/MS Pos Early	612-37-3	69160	C16355	HMDB11107
7-methylxanthine	1350	167.056	Xenobiotics	Xanthine Metabolism	LC/MS Pos Early	552-62-5	68374	C16353	HMDB01991
caffeic acid sulfate	1307	258.992	Xenobiotics	Xanthine Metabolism	LC/MS Polar				HMDB41708
caffeine	2106	195.088	Xenobiotics	Xanthine Metabolism	LC/MS Pos Early	58-08-2	2519	C07481	HMDB01847
paraxanthine	2279	179.057	Xenobiotics	Xanthine Metabolism	LC/MS Neg	611-59-6	4687	C13747	HMDB01860
theobromine	1600	181.072	Xenobiotics	Xanthine Metabolism	LC/MS Pos Early	83-67-0	5429	C07480	HMDB02825
theophylline	2356.9	179.057	Xenobiotics	Xanthine Metabolism	LC/MS Neg	58-55-9	2153	C07130	HMDB01889
Note: Compounds were identified by Metabolon, Inc. by comparison to spectral library entries of purified standards or recurrent unknown entities. Biochemical identifications are based on three criteria: retention index within a narrow RI window of the proposed identification, accurate mass match to the library +/- 10 ppm, and the MS/MS forward and reverse scores between the experimental data and …
