# Supplementary material for: Sex-Specific Catabolic Metabolism Alterations in the Critically Ill following High Dose Vitamin D
Source: Metabolites. 2022 Feb 25;12(3):207. doi: 10.3390/metabo12030207 (PMC8953844; doi:10.3390/metabo12030207)
Supplement: Supplementary file 1 [file metabolites-12-00207-s001.zip › Table S2.xlsx]

## Sheet: t-test women & men
Metabolite	t statistic Women	p-value Women	q-value Women	t statistic Men	p-value Men	q-value Men	Super Pathway	Sub Pathway
alanine	-0.030046	0.97607	0.99874	-1.004	0.31626	0.71957	Amino Acid	Alanine and Aspartate Metabolism
asparagine	0.23072	0.81785	0.99269	-1.0185	0.30933	0.71957	Amino Acid	Alanine and Aspartate Metabolism
aspartate	-0.75105	0.45381	0.94439	1.0084	0.31414	0.71957	Amino Acid	Alanine and Aspartate Metabolism
hydroxyasparagine	2.5383	0.012165	0.92246	0.45966	0.64612	0.88498	Amino Acid	Alanine and Aspartate Metabolism
N-acetylalanine	0.064709	0.94849	0.99874	0.43185	0.66619	0.89202	Amino Acid	Alanine and Aspartate Metabolism
N-acetylaspartate (NAA)	2.2548	0.025605	0.92246	1.5848	0.11415	0.58579	Amino Acid	Alanine and Aspartate Metabolism
2,3-dihydroxy-2-methylbutyrate	1.3665	0.17383	0.92246	0.81493	0.41582	0.79548	Amino Acid	BCAA Metabolism
2-hydroxy-3-methylvalerate	-0.060139	0.95213	0.99874	0.17279	0.86294	0.95719	Amino Acid	BCAA Metabolism
3-hydroxy-2-ethylpropionate	-0.84644	0.39866	0.93466	-1.2117	0.22667	0.66716	Amino Acid	BCAA Metabolism
3-hydroxyisobutyrate	-0.90214	0.36844	0.93466	-1.2852	0.1998	0.64595	Amino Acid	BCAA Metabolism
3-methyl-2-oxobutyrate	0.10757	0.91448	0.99269	-1.2085	0.2279	0.66716	Amino Acid	BCAA Metabolism
3-methyl-2-oxovalerate	0.77292	0.44079	0.93466	-2.6199	0.0092829	0.42682	Amino Acid	BCAA Metabolism
3-methylglutaconate	1.5551	0.12203	0.92246	1.4604	0.14531	0.60807	Amino Acid	BCAA Metabolism
4-methyl-2-oxopentanoate	-0.17465	0.86159	0.99269	-1.9819	0.048481	0.50127	Amino Acid	BCAA Metabolism
alpha-hydroxyisocaproate	-1.4231	0.15681	0.92246	-0.99823	0.31904	0.72174	Amino Acid	BCAA Metabolism
alpha-hydroxyisovalerate	-0.11542	0.90827	0.99269	-0.074463	0.9407	0.98124	Amino Acid	BCAA Metabolism
beta-hydroxyisovalerate	-0.52346	0.60143	0.96738	0.12846	0.89788	0.96784	Amino Acid	BCAA Metabolism
ethylmalonate	0.67159	0.50289	0.95262	1.5182	0.13011	0.59937	Amino Acid	BCAA Metabolism
isobutyrylglycine (C4)	1.2806	0.20231	0.92246	0.36687	0.714	0.90584	Amino Acid	BCAA Metabolism
isoleucine	-0.64439	0.52031	0.95525	-2.8498	0.004706	0.32774	Amino Acid	BCAA Metabolism
isovalerate (C5)	1.8131	0.071827	0.92246	-0.47998	0.63162	0.88118	Amino Acid	BCAA Metabolism
isovalerylglycine	1.9682	0.050903	0.92246	-0.22933	0.81879	0.94048	Amino Acid	BCAA Metabolism
leucine	-0.75839	0.44942	0.94306	-2.1446	0.032862	0.49768	Amino Acid	BCAA Metabolism
methylsuccinate	0.84826	0.39765	0.93466	1.1484	0.25181	0.67303	Amino Acid	BCAA Metabolism
N-acetylisoleucine	0.92936	0.35421	0.93067	0.38924	0.6974	0.9032	Amino Acid	BCAA Metabolism
N-acetylleucine	0.29911	0.76528	0.99269	-0.96134	0.33723	0.73734	Amino Acid	BCAA Metabolism
N-acetylvaline	0.85585	0.39346	0.93466	0.58112	0.56164	0.86373	Amino Acid	BCAA Metabolism
valine	-0.39569	0.6929	0.9854	-2.4605	0.014491	0.42682	Amino Acid	BCAA Metabolism
creatine	0.98665	0.32541	0.92246	-0.17102	0.86433	0.95736	Amino Acid	Creatine Metabolism
creatinine	0.8364	0.40427	0.93466	0.23234	0.81644	0.94048	Amino Acid	Creatine Metabolism
guanidinoacetate	0.5564	0.57877	0.96633	-0.93395	0.35115	0.74106	Amino Acid	Creatine Metabolism
4-hydroxyglutamate	0.5757	0.56569	0.96316	1.0934	0.27519	0.6939	Amino Acid	Glutamate Metabolism
alpha-ketoglutaramate*	2.3661	0.019262	0.92246	1.5451	0.12347	0.59903	Amino Acid	Glutamate Metabolism
beta-citrylglutamate	0.49244	0.62313	0.97321	1.8596	0.064006	0.53286	Amino Acid	Glutamate Metabolism
carboxyethyl-GABA	1.1219	0.26371	0.92246	2.6459	0.0086164	0.42682	Amino Acid	Glutamate Metabolism
citramalate	1.2739	0.20468	0.92246	1.0128	0.31203	0.71957	Amino Acid	Glutamate Metabolism
glutamate	-0.27327	0.78502	0.99269	0.22416	0.8228	0.94048	Amino Acid	Glutamate Metabolism
glutamine	-0.12665	0.89939	0.99269	-0.28645	0.77475	0.93142	Amino Acid	Glutamate Metabolism
N-acetyl-aspartyl-glutamate (NAAG)	0.93794	0.34979	0.92605	1.041	0.29878	0.71142	Amino Acid	Glutamate Metabolism
N-acetylglutamate	0.97411	0.33158	0.92246	0.0093601	0.99254	0.99559	Amino Acid	Glutamate Metabolism
N-acetylglutamine	0.61233	0.54125	0.96316	1.4028	0.16182	0.62526	Amino Acid	Glutamate Metabolism
N-methyl-GABA	1.3392	0.18256	0.92246	0.20268	0.83953	0.94086	Amino Acid	Glutamate Metabolism
pyroglutamine*	0.001974	0.99843	0.99874	-1.7648	0.078703	0.5423	Amino Acid	Glutamate Metabolism
S-1-pyrroline-5-carboxylate	-0.56103	0.57562	0.96633	-2.0954	0.037047	0.49979	Amino Acid	Glutamate Metabolism
2-aminobutyrate	-1.3816	0.16916	0.92246	-2.1407	0.033179	0.49768	Amino Acid	Glutathione Metabolism
2-hydroxybutyrate/2-hydroxyisobutyrate	-0.13231	0.89492	0.99269	-1.6218	0.10598	0.56606	Amino Acid	Glutathione Metabolism
5-oxoproline	0.53044	0.5966	0.9671	1.2201	0.22348	0.6638	Amino Acid	Glutathione Metabolism
cys-gly, oxidized	0.45956	0.6465	0.97787	2.1037	0.036309	0.49979	Amino Acid	Glutathione Metabolism
cysteine-glutathione disulfide	-0.10039	0.92017	0.99269	0.80932	0.41903	0.79548	Amino Acid	Glutathione Metabolism
cysteinylglycine	0.47731	0.63384	0.9748	1.327	0.18561	0.63842	Amino Acid	Glutathione Metabolism
cysteinylglycine disulfide*	-0.01964	0.98436	0.99874	0.82581	0.40963	0.79401	Amino Acid	Glutathione Metabolism
2-methylserine	-1.7721	0.078425	0.92246	-0.27454	0.78388	0.93467	Amino Acid	Glycine, Serine and Threonine Metabolism
allo-threonine	1.5513	0.12294	0.92246	0.27355	0.78463	0.93467	Amino Acid	Glycine, Serine and Threonine Metabolism
betaine	0.26263	0.7932	0.99269	0.44647	0.65561	0.8878	Amino Acid	Glycine, Serine and Threonine Metabolism
dimethylglycine	0.096028	0.92363	0.99269	-0.30014	0.76429	0.92112	Amino Acid	Glycine, Serine and Threonine Metabolism
glycine	0.12324	0.90208	0.99269	-0.054605	0.95649	0.98357	Amino Acid	Glycine, Serine and Threonine Metabolism
N-acetylglycine	0.37064	0.71143	0.98568	-0.36202	0.71762	0.90584	Amino Acid	Glycine, Serine and Threonine Metabolism
N-acetylserine	1.0397	0.30017	0.92246	0.8718	0.38408	0.77531	Amino Acid	Glycine, Serine and Threonine Metabolism
N-acetylthreonine	2.0294	0.044193	0.92246	0.702	0.48328	0.82991	Amino Acid	Glycine, Serine and Threonine Metabolism
sarcosine	1.3409	0.18198	0.92246	-0.95957	0.33812	0.73734	Amino Acid	Glycine, Serine and Threonine Metabolism
serine	1.7358	0.084665	0.92246	-1.4243	0.15549	0.62526	Amino Acid	Glycine, Serine and Threonine Metabolism
threonine	-0.10386	0.91742	0.99269	-1.9057	0.057738	0.52899	Amino Acid	Glycine, Serine and Threonine Metabolism
4-guanidinobutanoate	1.3855	0.16796	0.92246	-0.25084	0.80212	0.94048	Amino Acid	Guanidino and Acetamido Metabolism
guanidinosuccinate	1.8338	0.068685	0.92246	0.00748	0.99404	0.99559	Amino Acid	Guanidino and Acetamido Metabolism
1-methylguanidine	1.5902	0.11392	0.92246	1.2187	0.22399	0.6638	Amino Acid	Guanidino and Acetamido Metabolism
3-methylhistidine	1.0275	0.30585	0.92246	0.66979	0.50355	0.83707	Amino Acid	Histidine Metabolism
cis-urocanate	-0.19389	0.84653	0.99269	0.99139	0.32237	0.72341	Amino Acid	Histidine Metabolism
formiminoglutamate	0.53281	0.59496	0.9671	1.1661	0.24459	0.67303	Amino Acid	Histidine Metabolism
histidine	1.0674	0.28751	0.92246	-0.25381	0.79984	0.94048	Amino Acid	Histidine Metabolism
1-methyl-4-imidazoleacetate	0.75779	0.44977	0.94306	1.591	0.11275	0.58475	Amino Acid	Histidine Metabolism
hydantoin-5-propionic acid	0.50188	0.61649	0.96984	1.3461	0.17939	0.63294	Amino Acid	Histidine Metabolism
imidazole lactate	1.0887	0.27806	0.92246	-0.95956	0.33812	0.73734	Amino Acid	Histidine Metabolism
imidazole propionate	-1.042	0.29909	0.92246	1.058	0.29097	0.70229	Amino Acid	Histidine Metabolism
1-methylhistidine	-0.10151	0.91928	0.99269	0.47509	0.6351	0.88281	Amino Acid	Histidine Metabolism
N-acetyl-1-methylhistidine*	2.0198	0.045201	0.92246	0.5715	0.56813	0.86551	Amino Acid	Histidine Metabolism
N-acetyl-3-methylhistidine*	-0.11293	0.91024	0.99269	-0.27651	0.78237	0.93467	Amino Acid	Histidine Metabolism
N-acetylcarnosine	1.2261	0.2221	0.92246	1.455	0.14681	0.60911	Amino Acid	Histidine Metabolism
N-acetylhistidine	2.3376	0.020739	0.92246	0.79289	0.42853	0.79976	Amino Acid	Histidine Metabolism
trans-urocanate	0.9855	0.32598	0.92246	2.0274	0.043585	0.50127	Amino Acid	Histidine Metabolism
1-ribosyl-imidazoleacetate*	1.0062	0.31594	0.92246	1.3882	0.1662	0.62526	Amino Acid	Histidine Metabolism
5-(galactosylhydroxy)-L-lysine	2.0572	0.041415	0.92246	1.2787	0.20207	0.64595	Amino Acid	Lysine Metabolism
5-aminovalerate	1.2058	0.2298	0.92246	1.2273	0.22075	0.66022	Amino Acid	Lysine Metabolism
5-hydroxylysine	1.049	0.29589	0.92246	0.84396	0.39943	0.78834	Amino Acid	Lysine Metabolism
6-oxopiperidine-2-carboxylate	0.31313	0.75462	0.99269	-0.20268	0.83954	0.94086	Amino Acid	Lysine Metabolism
lysine	0.26375	0.79233	0.99269	-1.3121	0.19059	0.63859	Amino Acid	Lysine Metabolism
N,N,N-trimethyl-5-aminovalerate	-0.9024	0.3683	0.93466	-0.32667	0.74417	0.91496	Amino Acid	Lysine Metabolism
N2-acetyllysine	0.69446	0.48848	0.95262	0.85036	0.39587	0.78501	Amino Acid	Lysine Metabolism
N6,N6,N6-trimethyllysine	0.45168	0.65216	0.98176	0.34813	0.72801	0.90831	Amino Acid	Lysine Metabolism
N6-acetyllysine	0.39386	0.69425	0.9854	0.59799	0.55034	0.86077	Amino Acid	Lysine Metabolism
N-acetyl-cadaverine	0.94707	0.34513	0.92513	0.81199	0.4175	0.79548	Amino Acid	Lysine Metabolism
pipecolate	-0.87581	0.38254	0.93466	-0.7456	0.45655	0.81081	Amino Acid	Lysine Metabolism
3-sulfo-L-alanine	-2.2648	0.024965	0.92246	-1.4862	0.13838	0.59965	Amino Acid	Methionine, Cysteine, SAM and Taurine Metabolism
5-methylthioribose	1.3087	0.19266	0.92246	0.98231	0.32681	0.72749	Amino Acid	Methionine, Cysteine, SAM and Taurine Metabolism
alpha-ketobutyrate	0.61935	0.53663	0.96316	-1.6398	0.10218	0.56179	Amino Acid	Methionine, Cysteine, SAM and Taurine Metabolism
cystathionine	0.55257	0.58138	0.96633	0.3958	0.69256	0.90049	Amino Acid	Methionine, Cysteine, SAM and Taurine Metabolism
cysteine	1.495	0.13702	0.92246	1.6206	0.10624	0.56606	Amino Acid	Methionine, Cysteine, SAM and Taurine Metabolism
cysteine s-sulfate	0.93591	0.35083	0.92605	-1.1801	0.23899	0.6706	Amino Acid	Methionine, Cysteine, SAM and Taurine Metabolism
cysteine sulfinic acid	1.1075	0.26984	0.92246	-0.47191	0.63737	0.88347	Amino Acid	Methionine, Cysteine, SAM and Taurine Metabolism
cystine	-0.68552	0.49408	0.95262	-1.9558	0.051498	0.5021	Amino Acid	Methionine, Cysteine, SAM and Taurine Metabolism
hypotaurine	-0.49559	0.62092	0.97301	0.4427	0.65833	0.8894	Amino Acid	Methionine, Cysteine, SAM and Taurine Metabolism
lanthionine	0.70528	0.48174	0.9496	0.73064	0.46562	0.81651	Amino Acid	Methionine, Cysteine, SAM and Taurine Metabolism
methionine	0.22735	0.82046	0.99269	-1.9675	0.050135	0.50127	Amino Acid	Methionine, Cysteine, SAM and Taurine Metabolism
methionine sulfone	0.25474	0.79928	0.99269	0.40194	0.68804	0.89918	Amino Acid	Methionine, Cysteine, SAM and Taurine Metabolism
methionine sulfoxide	0.029529	0.97648	0.99874	-0.49062	0.62409	0.88118	Amino Acid	Methionine, Cysteine, SAM and Taurine Metabolism
N-acetylmethionine	-1.2591	0.20997	0.92246	-1.127	0.26071	0.68147	Amino Acid	Methionine, Cysteine, SAM and Taurine Metabolism
N-acetyltaurine	0.36326	0.71692	0.98771	1.3096	0.19143	0.6392	Amino Acid	Methionine, Cysteine, SAM and Taurine Metabolism
N-formylmethionine	0.038535	0.96931	0.99874	0.12427	0.90119	0.96873	Amino Acid	Methionine, Cysteine, SAM and Taurine Metabolism
N-methyltaurine	0.77334	0.44055	0.93466	-1.2542	0.21084	0.65536	Amino Acid	Methionine, Cysteine, SAM and Taurine Metabolism
S-adenosylhomocysteine (SAH)	0.70771	0.48023	0.94877	0.99059	0.32275	0.72341	Amino Acid	Methionine, Cysteine, SAM and Taurine Metabolism
S-methylcysteine	-1.6307	0.10507	0.92246	-1.0382	0.30007	0.71184	Amino Acid	Methionine, Cysteine, SAM and Taurine Metabolism
S-methylcysteine sulfoxide	-1.0712	0.28583	0.92246	-0.42706	0.66967	0.89442	Amino Acid	Methionine, Cysteine, SAM and Taurine Metabolism
S-methylmethionine	-1.6695	0.097125	0.92246	0.088964	0.92918	0.97923	Amino Acid	Methionine, Cysteine, SAM and Taurine Metabolism
taurine	-1.2664	0.20735	0.92246	-1.1826	0.23799	0.6706	Amino Acid	Methionine, Cysteine, SAM and Taurine Metabolism
4-hydroxyphenylacetate	-0.73409	0.46405	0.94877	1.8924	0.059489	0.52899	Amino Acid	Phenylalanine Metabolism
N-acetylphenylalanine	1.3412	0.1819	0.92246	0.57979	0.56253	0.86373	Amino Acid	Phenylalanine Metabolism
phenylacetate	-0.37814	0.70587	0.9854	0.062492	0.95022	0.98357	Amino Acid	Phenylalanine Metabolism
phenylalanine	0.10585	0.91584	0.99269	-1.019	0.30912	0.71957	Amino Acid	Phenylalanine Metabolism
phenyllactate (PLA)	0.54829	0.58431	0.9671	0.96043	0.33768	0.73734	Amino Acid	Phenylalanine Metabolism
phenylpyruvate	0.63728	0.52492	0.95744	-0.080313	0.93605	0.97923	Amino Acid	Phenylalanine Metabolism
(N(1) + N(8))-acetylspermidine	1.5409	0.12545	0.92246	1.4706	0.14256	0.6019	Amino Acid	Polyamine Metabolism
4-acetamidobutanoate	1.6031	0.11102	0.92246	2.4677	0.014207	0.42682	Amino Acid	Polyamine Metabolism
5-methylthioadenosine (MTA)	0.68551	0.49408	0.95262	1.6055	0.10953	0.5764	Amino Acid	Polyamine Metabolism
acisoga	0.64519	0.51979	0.95525	0.93036	0.353	0.74215	Amino Acid	Polyamine Metabolism
N1,N12-diacetylspermine	0.77186	0.44142	0.93466	1.3073	0.19219	0.63954	Amino Acid	Polyamine Metabolism
N-acetyl-isoputreanine*	0.72451	0.46989	0.94877	1.7265	0.085388	0.5423	Amino Acid	Polyamine Metabolism
N-acetylputrescine	0.0098034	0.99219	0.99874	3.1256	0.0019641	0.20451	Amino Acid	Polyamine Metabolism
spermidine	-1.1314	0.25971	0.92246	-0.15723	0.87518	0.95934	Amino Acid	Polyamine Metabolism
3-indoxyl sulfate	-0.80544	0.42185	0.93466	0.67547	0.49994	0.83707	Amino Acid	Tryptophan Metabolism
C-glycosyltryptophan	1.0635	0.28927	0.92246	1.0004	0.31799	0.72103	Amino Acid	Tryptophan Metabolism
indole-3-carboxylate	1.1281	0.2611	0.92246	-0.057454	0.95423	0.98357	Amino Acid	Tryptophan Metabolism
indoleacetate	1.8386	0.067967	0.92246	-0.00061384	0.99951	0.99951	Amino Acid	Tryptophan Metabolism
indoleacetylglutamine	0.18163	0.85612	0.99269	0.083901	0.9332	0.97923	Amino Acid	Tryptophan Metabolism
indolelactate	1.4634	0.14548	0.92246	1.155	0.24911	0.67303	Amino Acid	Tryptophan Metabolism
indolepropionate	0.025789	0.97946	0.99874	0.82801	0.40838	0.79401	Amino Acid	Tryptophan Metabolism
kynurenate	1.3838	0.16848	0.92246	0.79048	0.42993	0.79997	Amino Acid	Tryptophan Metabolism
kynurenine	0.66954	0.50419	0.95262	0.86628	0.38709	0.77658	Amino Acid	Tryptophan Metabolism
N-acetylkynurenine (2)	1.1943	0.23424	0.92246	0.46181	0.64458	0.88498	Amino Acid	Tryptophan Metabolism
N-acetyltryptophan	0.8159	0.41586	0.93466	1.8417	0.06659	0.53286	Amino Acid	Tryptophan Metabolism
N-formylanthranilic acid	1.9304	0.055458	0.92246	-0.45294	0.65095	0.88498	Amino Acid	Tryptophan Metabolism
picolinate	1.4688	0.14401	0.92246	0.61532	0.53885	0.85578	Amino Acid	Tryptophan Metabolism
serotonin	0.12066	0.90412	0.99269	-2.039	0.042409	0.50127	Amino Acid	Tryptophan Metabolism
tryptophan	-0.7098	0.47894	0.94877	-1.1203	0.26355	0.6816	Amino Acid	Tryptophan Metabolism
tryptophan betaine	-1.259	0.20999	0.92246	0.72596	0.46848	0.81858	Amino Acid	Tryptophan Metabolism
xanthurenate	0.2808	0.77925	0.99269	-0.50284	0.61548	0.87798	Amino Acid	Tryptophan Metabolism
2-hydroxyphenylacetate	1.6161	0.1082	0.92246	0.36334	0.71663	0.90584	Amino Acid	Tyrosine Metabolism
3-(4-hydroxyphenyl)lactate (HPLA)	-0.27339	0.78493	0.99269	1.1302	0.25939	0.68147	Amino Acid	Tyrosine Metabolism
3,4-dihydroxyphenylacetate sulfate	1.8898	0.060727	0.92246	0.56112	0.57517	0.86944	Amino Acid	Tyrosine Metabolism
3-hydroxyphenylacetate sulfate	1.5506	0.12313	0.92246	0.58281	0.5605	0.86373	Amino Acid	Tyrosine Metabolism
3-methoxytyramine sulfate	2.1671	0.031815	0.92246	0.35755	0.72095	0.90584	Amino Acid	Tyrosine Metabolism
3-methoxytyrosine	-0.025011	0.98008	0.99874	-0.77713	0.43775	0.8045	Amino Acid	Tyrosine Metabolism
4-hydroxyphenylacetatoylcarnitine	0.12916	0.8974	0.99269	0.72822	0.4671	0.81764	Amino Acid	Tyrosine Metabolism
4-hydroxyphenylpyruvate	-0.88251	0.37893	0.93466	-0.67231	0.50195	0.83707	Amino Acid	Tyrosine Metabolism
4-methoxyphenol sulfate	0.0018821	0.9985	0.99874	0.8097	0.41881	0.79548	Amino Acid	Tyrosine Metabolism
5-hydroxymethyl-2-furoic acid	-0.71109	0.47814	0.94877	2.345	0.01974	0.42682	Amino Acid	Tyrosine Metabolism
dopamine 3-O-sulfate	1.8841	0.061506	0.92246	-0.52507	0.59996	0.87798	Amino Acid	Tyrosine Metabolism
dopamine 4-sulfate	1.797	0.074359	0.92246	-0.50314	0.61527	0.87798	Amino Acid	Tyrosine Metabolism
gentisate	-0.17489	0.8614	0.99269	0.8983	0.36981	0.75909	Amino Acid	Tyrosine Metabolism
homovanillate (HVA)	2.0228	0.044887	0.92246	1.8227	0.06943	0.53286	Amino Acid	Tyrosine Metabolism
homovanillate sulfate	2.059	0.041234	0.92246	0.80828	0.41963	0.79548	Amino Acid	Tyrosine Metabolism
indoxyl glucuronide	0.15719	0.87531	0.99269	1.4685	0.1431	0.6019	Amino Acid	Tyrosine Metabolism
N-acetyltyrosine	1.1908	0.23563	0.92246	0.96791	0.33394	0.73665	Amino Acid	Tyrosine Metabolism
N-formylphenylalanine	0.99073	0.32342	0.92246	-0.27913	0.78036	0.93467	Amino Acid	Tyrosine Metabolism
p-cresol glucuronide*	-0.27861	0.78093	0.99269	0.66389	0.50732	0.83848	Amino Acid	Tyrosine Metabolism
phenol glucuronide	-1.0321	0.30371	0.92246	1.3594	0.17515	0.63014	Amino Acid	Tyrosine Metabolism
phenol sulfate	-0.43956	0.66089	0.9854	1.0757	0.28302	0.70229	Amino Acid	Tyrosine Metabolism
thyroxine	-0.054131	0.9569	0.99874	-3.0191	0.0027731	0.20799	Amino Acid	Tyrosine Metabolism
tyramine O-sulfate	-0.41851	0.67618	0.9854	1.3736	0.17069	0.62679	Amino Acid	Tyrosine Metabolism
tyrosine	-0.78885	0.43145	0.93466	-0.44124	0.65939	0.8894	Amino Acid	Tyrosine Metabolism
vanillactate	2.6086	0.010018	0.92246	0.8687	0.38577	0.77658	Amino Acid	Tyrosine Metabolism
vanillic alcohol sulfate	1.1239	0.26287	0.92246	0.51983	0.6036	0.87798	Amino Acid	Tyrosine Metabolism
vanillylmandelate (VMA)	1.7699	0.078787	0.92246	1.7222	0.08616	0.5423	Amino Acid	Tyrosine Metabolism
2-oxoarginine*	0.50517	0.61418	0.96984	-0.50292	0.61543	0.87798	Amino Acid	Urea cycle; Arginine and Proline Metabolism
3-hydroxyproline	1.512	0.13265	0.92246	0.86634	0.38706	0.77658	Amino Acid	Urea cycle; Arginine and Proline Metabolism
argininate*	1.3371	0.18323	0.92246	-0.63543	0.52567	0.85369	Amino Acid	Urea cycle; Arginine and Proline Metabolism
arginine	-1.1364	0.25761	0.92246	-2.4901	0.01336	0.42682	Amino Acid	Urea cycle; Arginine and Proline Metabolism
citrulline	-0.53546	0.59313	0.9671	-2.0435	0.041959	0.50127	Amino Acid	Urea cycle; Arginine and Proline Metabolism
dimethylarginine (ADMA + SDMA)	0.66008	0.51022	0.95262	0.34746	0.72851	0.90831	Amino Acid	Urea cycle; Arginine and Proline Metabolism
homoarginine	-0.61582	0.53895	0.96316	-1.7132	0.087801	0.5423	Amino Acid	Urea cycle; Arginine and Proline Metabolism
homocitrulline	1.569	0.11878	0.92246	0.47857	0.63262	0.88118	Amino Acid	Urea cycle; Arginine and Proline Metabolism
hydroxyproline	-0.0015867	0.99874	0.99874	0.59465	0.55256	0.86077	Amino Acid	Urea cycle; Arginine and Proline Metabolism
N2,N5-diacetylornithine	0.10987	0.91266	0.99269	-0.40646	0.68472	0.89918	Amino Acid	Urea cycle; Arginine and Proline Metabolism
N-acetylarginine	0.17107	0.8644	0.99269	-0.041712	0.96676	0.98597	Amino Acid	Urea cycle; Arginine and Proline Metabolism
N-acetylcitrulline	1.0872	0.27871	0.92246	0.14427	0.88539	0.96561	Amino Acid	Urea cycle; Arginine and Proline Metabolism
N-acetylproline	0.85405	0.39445	0.93466	-0.28032	0.77944	0.93467	Amino Acid	Urea cycle; Arginine and Proline Metabolism
N-delta-acetylornithine	0.36629	0.71467	0.98771	-1.799	0.073122	0.53286	Amino Acid	Urea cycle; Arginine and Proline Metabolism
N-methylhydroxyproline	1.8045	0.073165	0.92246	1.0194	0.30892	0.71957	Amino Acid	Urea cycle; Arginine and Proline Metabolism
N-methylproline	0.62961	0.52991	0.96294	-0.39437	0.69361	0.90049	Amino Acid	Urea cycle; Arginine and Proline Metabolism
ornithine	-1.0333	0.30313	0.92246	-1.6737	0.095323	0.5467	Amino Acid	Urea cycle; Arginine and Proline Metabolism
proline	-1.8887	0.06087	0.92246	-1.9076	0.057483	0.52899	Amino Acid	Urea cycle; Arginine and Proline Metabolism
prolylhydroxyproline	1.7606	0.080359	0.92246	1.2444	0.21442	0.65536	Amino Acid	Urea cycle; Arginine and Proline Metabolism
urea	0.77739	0.43816	0.93466	0.20362	0.8388	0.94086	Amino Acid	Urea cycle; Arginine and Proline Metabolism
N6-carboxymethyllysine	1.5022	0.13517	0.92246	1.331	0.18431	0.63723	Carbohydrate	Advanced Glycation End-product
erythronate*	2.7542	0.0066173	0.92246	1.0233	0.30705	0.71957	Carbohydrate	Aminosugar Metabolism
glucuronate	1.167	0.24508	0.92246	2.3467	0.01965	0.42682	Carbohydrate	Aminosugar Metabolism
N-acetylglucosamine/N-acetylgalactosamine	0.38976	0.69727	0.9854	2.3441	0.019785	0.42682	Carbohydrate	Aminosugar Metabolism
N-acetylglucosaminylasparagine	3.2613	0.0013748	0.66954	0.54572	0.5857	0.8743	Carbohydrate	Aminosugar Metabolism
N-acetylneuraminate	2.7244	0.0072135	0.92246	2.0562	0.040706	0.50127	Carbohydrate	Aminosugar Metabolism
sucrose	0.59979	0.54956	0.96316	0.21249	0.83188	0.94086	Carbohydrate	Disaccharides and Oligosaccharides
fructose	-0.89436	0.37257	0.93466	-2.3178	0.021196	0.42682	Carbohydrate	Fructose, Mannose and Galactose Metabolism
galactonate	0.50211	0.61633	0.96984	-0.19502	0.84552	0.94539	Carbohydrate	Fructose, Mannose and Galactose Metabolism
mannitol/sorbitol	-0.38419	0.70139	0.9854	2.4342	0.01556	0.42682	Carbohydrate	Fructose, Mannose and Galactose Metabolism
mannose	-0.33313	0.7395	0.99212	-2.4741	0.013962	0.42682	Carbohydrate	Fructose, Mannose and Galactose Metabolism
maltose	1.457	0.14721	0.92246	1.8543	0.064767	0.53286	Carbohydrate	Glycogen Metabolism
maltotetraose	2.0196	0.045221	0.92246	1.2835	0.20041	0.64595	Carbohydrate	Glycogen Metabolism
maltotriose	1.4643	0.14523	0.92246	2.0552	0.040808	0.50127	Carbohydrate	Glycogen Metabolism
3-phosphoglycerate	-0.9237	0.35713	0.93439	-1.784	0.075519	0.5414	Carbohydrate	Glycolysis, Gluconeogenesis, and Pyruvate Metabolism
1,5-anhydroglucitol (1,5-AG)	-1.4796	0.14109	0.92246	-1.224	0.22201	0.66196	Carbohydrate	Glycolysis, Gluconeogenesis, and Pyruvate Metabolism
glucose	-1.2954	0.1972	0.92246	-0.79384	0.42798	0.79976	Carbohydrate	Glycolysis, Gluconeogenesis, and Pyruvate Metabolism
glycerate	0.17489	0.8614	0.99269	-0.54686	0.58492	0.8743	Carbohydrate	Glycolysis, Gluconeogenesis, and Pyruvate Metabolism
lactate	-0.67001	0.50389	0.95262	0.21024	0.83364	0.94086	Carbohydrate	Glycolysis, Gluconeogenesis, and Pyruvate Metabolism
pyruvate	-1.3516	0.17856	0.92246	-0.3508	0.72601	0.90777	Carbohydrate	Glycolysis, Gluconeogenesis, and Pyruvate Metabolism
arabinose	-0.014595	0.98837	0.99874	-0.47854	0.63264	0.88118	Carbohydrate	Pentose Metabolism
arabitol/xylitol	1.6936	0.092424	0.92246	1.3884	0.16613	0.62526	Carbohydrate	Pentose Metabolism
arabonate/xylonate	2.1144	0.036145	0.92246	1.2091	0.22768	0.66716	Carbohydrate	Pentose Metabolism
gluconate	0.9367	0.35043	0.92605	1.382	0.16809	0.62526	Carbohydrate	Pentose Metabolism
ribitol	1.5939	0.11308	0.92246	1.9007	0.058383	0.52899	Carbohydrate	Pentose Metabolism
ribonate (ribonolactone)	1.1298	0.26038	0.92246	2.0263	0.043699	0.50127	Carbohydrate	Pentose Metabolism
ribulonate/xylulonate*	2.5395	0.012126	0.92246	-0.53426	0.59359	0.87671	Carbohydrate	Pentose Metabolism
sedoheptulose	0.47126	0.63814	0.97511	-0.37896	0.70501	0.90584	Carbohydrate	Pentose Metabolism
xylose	-0.45825	0.64744	0.97787	-0.49835	0.61864	0.87798	Carbohydrate	Pentose Metabolism
gulonate*	1.0457	0.29738	0.92246	2.326	0.020745	0.42682	Cofactors and Vitamins	Ascorbate and Aldarate Metabolism
oxalate (ethanedioate)	0.75743	0.44999	0.94306	0.16734	0.86723	0.95867	Cofactors and Vitamins	Ascorbate and Aldarate Metabolism
threonate	0.86129	0.39046	0.93466	-0.17886	0.85818	0.95408	Cofactors and Vitamins	Ascorbate and Aldarate Metabolism
bilirubin	-0.31311	0.75464	0.99269	2.7224	0.0068954	0.42019	Cofactors and Vitamins	Hemoglobin and Porphyrin Metabolism
bilirubin (E,E)*	-0.48345	0.62949	0.97321	2.172	0.030713	0.48299	Cofactors and Vitamins	Hemoglobin and Porphyrin Metabolism
bilirubin (E,Z or Z,E)*	-0.47757	0.63365	0.9748	3.2589	0.0012588	0.20451	Cofactors and Vitamins	Hemoglobin and Porphyrin Metabolism
biliverdin	-0.29788	0.76621	0.99269	2.123	0.034643	0.49979	Cofactors and Vitamins	Hemoglobin and Porphyrin Metabolism
D-urobilin	0.012706	0.98988	0.99874	1.4027	0.16185	0.62526	Cofactors and Vitamins	Hemoglobin and Porphyrin Metabolism
heme	-0.33513	0.738	0.99212	-1.0604	0.28989	0.70229	Cofactors and Vitamins	Hemoglobin and Porphyrin Metabolism
I-urobilinogen	-0.12991	0.89681	0.99269	0.58026	0.56221	0.86373	Cofactors and Vitamins	Hemoglobin and Porphyrin Metabolism
L-urobilin	1.0989	0.27358	0.92246	0.1553	0.8767	0.95935	Cofactors and Vitamins	Hemoglobin and Porphyrin Metabolism
1-methylnicotinamide	1.1405	0.2559	0.92246	1.6773	0.094614	0.5467	Cofactors and Vitamins	Nicotinate and Nicotinamide Metabolism
N1-Methyl-2-pyridone-5-carboxamide	2.413	0.017037	0.92246	0.95566	0.34008	0.73734	Cofactors and Vitamins	Nicotinate and Nicotinamide Metabolism
nicotinamide	-0.53699	0.59208	0.9671	-0.88092	0.37913	0.76851	Cofactors and Vitamins	Nicotinate and Nicotinamide Metabolism
nicotinamide riboside	1.0944	0.27555	0.92246	1.1828	0.23791	0.6706	Cofactors and Vitamins	Nicotinate and Nicotinamide Metabolism
quinolinate	0.97423	0.33152	0.92246	1.2996	0.19483	0.64175	Cofactors and Vitamins	Nicotinate and Nicotinamide Metabolism
trigonelline (N'-methylnicotinate)	-0.72634	0.46877	0.94877	0.27292	0.78512	0.93467	Cofactors and Vitamins	Nicotinate and Nicotinamide Metabolism
pantothenate (Vitamin B5)	1.3679	0.17341	0.92246	0.65383	0.51377	0.84473	Cofactors and Vitamins	Pantothenate and CoA Metabolism
riboflavin (Vitamin B2)	-0.71982	0.47277	0.94877	-0.27746	0.78163	0.93467	Cofactors and Vitamins	Riboflavin Metabolism
thiamin (Vitamin B1)	-0.092483	0.92644	0.99269	0.14946	0.8813	0.96223	Cofactors and Vitamins	Thiamine Metabolism
alpha-CEHC glucuronide*	1.1307	0.25999	0.92246	0.64975	0.5164	0.84654	Cofactors and Vitamins	Tocopherol Metabolism
alpha-CEHC sulfate	1.5357	0.12674	0.92246	1.2789	0.20201	0.64595	Cofactors and Vitamins	Tocopherol Metabolism
alpha-tocopherol	-0.45897	0.64692	0.97787	-2.1859	0.029667	0.4821	Cofactors and Vitamins	Tocopherol Metabolism
delta-CEHC glucuronide*	1.9994	0.047388	0.92246	0.45561	0.64903	0.88498	Cofactors and Vitamins	Tocopherol Metabolism
gamma-CEHC	0.3495	0.7272	0.99212	-0.92271	0.35697	0.74298	Cofactors and Vitamins	Tocopherol Metabolism
gamma-CEHC glucuronide*	1.4658	0.1448	0.92246	-0.35168	0.72535	0.90777	Cofactors and Vitamins	Tocopherol Metabolism
gamma-CEHC sulfate*	0.59089	0.55549	0.96316	-0.36042	0.71881	0.90584	Cofactors and Vitamins	Tocopherol Metabolism
gamma-tocopherol/beta-tocopherol	-0.58705	0.55806	0.96316	-0.83364	0.40521	0.79333	Cofactors and Vitamins	Tocopherol Metabolism
beta-cryptoxanthin	0.78773	0.43211	0.93466	-1.7702	0.0778	0.5423	Cofactors and Vitamins	Vitamin A Metabolism
carotene diol (1)	-1.373	0.17181	0.92246	-3.0469	0.0025366	0.2061	Cofactors and Vitamins	Vitamin A Metabolism
carotene diol (2)	-1.6052	0.11057	0.92246	-3.578	0.00040908	0.20451	Cofactors and Vitamins	Vitamin A Metabolism
carotene diol (3)	-1.5494	0.12341	0.92246	-1.2885	0.19864	0.6456	Cofactors and Vitamins	Vitamin A Metabolism
retinol (Vitamin A)	0.28038	0.77958	0.99269	-1.7983	0.073234	0.53286	Cofactors and Vitamins	Vitamin A Metabolism
pyridoxal	0.82355	0.41151	0.93466	-1.4878	0.13794	0.59965	Cofactors and Vitamins	Vitamin B6 Metabolism
pyridoxate	2.0068	0.046579	0.92246	-1.1826	0.23798	0.6706	Cofactors and Vitamins	Vitamin B6 Metabolism
pyridoxine (Vitamin B6)	1.1374	0.25718	0.92246	-1.8813	0.060989	0.53286	Cofactors and Vitamins	Vitamin B6 Metabolism
phosphate	0.38243	0.70269	0.9854	1.0081	0.31431	0.71957	Energy	Oxidative Phosphorylation
2-methylcitrate/homocitrate	1.5248	0.12943	0.92246	1.3447	0.17982	0.63294	Energy	TCA Cycle
aconitate [cis or trans]	1.7345	0.084895	0.92246	1.1351	0.25731	0.67989	Energy	TCA Cycle
alpha-ketoglutarate	0.90109	0.369	0.93466	2.3054	0.021888	0.42682	Energy	TCA Cycle
citrate	1.6204	0.10727	0.92246	1.0634	0.28855	0.70229	Energy	TCA Cycle
fumarate	-0.48661	0.62725	0.97321	-0.56406	0.57317	0.86807	Energy	TCA Cycle
malate	-0.13929	0.88941	0.99269	-0.057827	0.95393	0.98357	Energy	TCA Cycle
succinate	0.43654	0.66308	0.9854	0.40275	0.68744	0.89918	Energy	TCA Cycle
acetylcarnitine (C2)	1.3303	0.18545	0.92246	-0.061649	0.95089	0.98357	Lipid	Short-chain Acylcarnitine
3-hydroxybutyrylcarnitine (C3-DC)	0.64519	0.51979	0.95525	0.35314	0.72426	0.90777	Lipid	Short-chain Acylcarnitine
malonylcarnitine (C3-DC)	0.41073	0.68186	0.9854	1.072	0.28467	0.70229	Lipid	Short-chain Acylcarnitine
propionylcarnitine (C3)	-0.44396	0.65772	0.98405	-0.76081	0.44742	0.80496	Lipid	Short-chain Acylcarnitine
2-methylmalonylcarnitine (C4-DC)	2.2091	0.028691	0.92246	1.0497	0.29475	0.70785	Lipid	Short-chain Acylcarnitine
3-hydroxybutyrylcarnitine (C4-OH)	-0.52258	0.60204	0.96738	-0.61187	0.54113	0.85578	Lipid	Short-chain Acylcarnitine
butyrylcarnitine (C4)	0.0082488	0.99343	0.99874	0.75394	0.45153	0.80811	Lipid	Short-chain Acylcarnitine
isobutyrylcarnitine (C4)	-0.31601	0.75244	0.99269	-0.22734	0.82033	0.94048	Amino Acid	Short-chain Acylcarnitine
succinylcarnitine (C4-DC)	1.5154	0.13179	0.92246	1.457	0.14625	0.60911	Energy	Short-chain Acylcarnitine
2-methylbutyroylcarnitine (C5)	0.62443	0.5333	0.96316	-0.30603	0.75982	0.91913	Amino Acid	Short-chain Acylcarnitine
glutaroylcarnitine (C5)	1.7134	0.088728	0.92246	1.3527	0.17728	0.63209	Amino Acid	Short-chain Acylcarnitine
isovalerylcarnitine (C5)	0.071515	0.94308	0.99874	-0.95028	0.3428	0.73734	Amino Acid	Short-chain Acylcarnitine
tiglyl carnitine (C5)	1.3607	0.17565	0.92246	-0.63056	0.52885	0.85369	Amino Acid	Short-chain Acylcarnitine
3-methylglutarylcarnitine (C6-DC)	1.1247	0.26253	0.92246	1.505	0.13348	0.59937	Amino Acid	Short-chain Acylcarnitine
adipoylcarnitine (C6-DC)	1.857	0.065289	0.92246	1.089	0.27709	0.6963	Lipid	Short-chain Acylcarnitine
hexanoylcarnitine (C6)	0.90729	0.36572	0.93466	0.29431	0.76874	0.92534	Lipid	Short-chain Acylcarnitine
3-methyladipoylcarnitine (C7-DC)	1.4366	0.15292	0.92246	1.1693	0.24331	0.67303	Lipid	Short-chain Acylcarnitine
octanoylcarnitine (C8)	1.0665	0.28793	0.92246	0.60046	0.54869	0.86077	Lipid	Medium-chain Acylcarnitine
suberoylcarnitine (C8-DC)	2.1729	0.031366	0.92246	1.0572	0.29134	0.70229	Lipid	Medium-chain Acylcarnitine
cis-4-decenoylcarnitine (C10:1)	0.79378	0.42858	0.93466	0.58557	0.55865	0.86373	Lipid	Medium-chain Acylcarnitine
decanoylcarnitine (C10)	0.68763	0.49275	0.95262	0.76072	0.44748	0.80496	Lipid	Medium-chain Acylcarnitine
5-dodecenoylcarnitine (C12:1)	1.3878	0.16726	0.92246	1.0212	0.30805	0.71957	Lipid	Medium-chain Acylcarnitine
laurylcarnitine (C12)	0.6214	0.53529	0.96316	0.86067	0.39017	0.77954	Lipid	Medium-chain Acylcarnitine
myristoleoylcarnitine (C14:1)*	0.74512	0.45737	0.94783	0.62367	0.53336	0.85578	Lipid	Medium-chain Acylcarnitine
myristoylcarnitine (C14)	0.53086	0.59631	0.9671	0.73462	0.46319	0.81615	Lipid	Medium-chain Acylcarnitine
palmitoleoylcarnitine (C16:1)*	-0.33419	0.7387	0.99212	1.2462	0.21374	0.65536	Lipid	Long-chain Acylcarnitine
palmitoylcarnitine (C16)	-0.74037	0.46024	0.94877	-0.64943	0.51661	0.84654	Lipid	Long-chain Acylcarnitine
margaroylcarnitine (C17)*	-1.1044	0.27119	0.92246	-1.0141	0.31142	0.71957	Lipid	Long-chain Acylcarnitine
3-hydroxyoleoylcarnitine (C18:1-OH)	1.0134	0.31252	0.92246	0.33735	0.73611	0.90904	Lipid	Long-chain Acylcarnitine
linolenoylcarnitine (C18:3)*	-0.26346	0.79256	0.99269	-0.69141	0.48989	0.8343	Lipid	Long-chain Acylcarnitine
linoleoylcarnitine (C18:2)*	-0.16877	0.86621	0.99269	-0.88615	0.37631	0.76598	Lipid	Long-chain Acylcarnitine
octadecanedioylcarnitine (C18-DC)*	0.40503	0.68604	0.9854	1.7237	0.085891	0.5423	Lipid	Long-chain Acylcarnitine
octadecenedioylcarnitine (C18:1-DC)*	0.95553	0.34086	0.92246	2.4514	0.014854	0.42682	Lipid	Long-chain Acylcarnitine
oleoylcarnitine (C18)	-1.315	0.19055	0.92246	0.30895	0.75759	0.91872	Lipid	Long-chain Acylcarnitine
stearoylcarnitine (C18)	-0.97564	0.33082	0.92246	-1.1602	0.24696	0.67303	Lipid	Long-chain Acylcarnitine
arachidonoylcarnitine (C20:4)	-1.3382	0.18288	0.92246	-0.50275	0.61554	0.87798	Lipid	Long-chain Acylcarnitine
arachidoylcarnitine (C20)*	1.0307	0.30436	0.92246	-1.4523	0.14757	0.60966	Lipid	Long-chain Acylcarnitine
dihomo-linolenoylcarnitine (C20:3n3 or 6)*	-2.0069	0.046574	0.92246	-0.75321	0.45197	0.80811	Lipid	Long-chain Acylcarnitine
dihomo-linoleoylcarnitine (C20:2)*	0.66749	0.50549	0.95262	-0.50384	0.61477	0.87798	Lipid	Long-chain Acylcarnitine
eicosenoylcarnitine (C20:1)*	-0.58856	0.55705	0.96316	-0.32221	0.74754	0.91659	Lipid	Long-chain Acylcarnitine
adrenoylcarnitine (C22:4)*	0.036137	0.97122	0.99874	-0.30286	0.76222	0.92054	Lipid	Long-chain Acylcarnitine
behenoylcarnitine (C22)*	-1.9407	0.054184	0.92246	0.34041	0.73381	0.90904	Lipid	Long-chain Acylcarnitine
docosahexaenoylcarnitine (C22:6)*	1.5674	0.11915	0.92246	-0.12053	0.90415	0.96873	Lipid	Long-chain Acylcarnitine
docosapentaenoylcarnitine (C22:5n3)*	0.29887	0.76545	0.99269	0.33676	0.73656	0.90904	Lipid	Long-chain Acylcarnitine
lignoceroylcarnitine (C24)*	-1.479	0.14124	0.92246	-0.51396	0.60769	0.87798	Lipid	Long-chain Acylcarnitine
nervonoylcarnitine (C24:1)*	0.32421	0.74623	0.99269	0.2081	0.8353	0.94086	Lipid	Long-chain Acylcarnitine
cerotoylcarnitine (C26)*	-1.1853	0.2378	0.92246	-0.48155	0.63051	0.88118	Lipid	Long-chain Acylcarnitine
ximenoylcarnitine (C26:1)*	-1.0538	0.29366	0.92246	0.0068089	0.99457	0.99559	Lipid	Long-chain Acylcarnitine
5alpha-androstan-3alpha,17alpha-diol disulfate	-0.084049	0.93313	0.99556	1.9896	0.047626	0.50127	Lipid	Androgenic Steroids
5alpha-androstan-3alpha,17beta-diol disulfate	0.95627	0.34048	0.92246	2.0627	0.04008	0.50127	Lipid	Androgenic Steroids
5alpha-androstan-3alpha,17beta-diol monosulfate (1)	-0.78957	0.43103	0.93466	0.066608	0.94694	0.98357	Lipid	Androgenic Steroids
5alpha-androstan-3alpha,17beta-diol monosulfate (2)	-0.1441	0.88561	0.99269	0.40365	0.68679	0.89918	Lipid	Androgenic Steroids
5alpha-androstan-3beta,17alpha-diol disulfate	1.1756	0.24163	0.92246	-1.5342	0.12613	0.59937	Lipid	Androgenic Steroids
5alpha-androstan-3beta,17beta-diol disulfate	-0.23356	0.81564	0.99269	0.94181	0.34712	0.74057	Lipid	Androgenic Steroids
5alpha-androstan-3beta,17beta-diol monosulfate (2)	0.53144	0.5959	0.9671	-0.37562	0.70749	0.90584	Lipid	Androgenic Steroids
11-ketoetiocholanolone glucuronide	0.39254	0.69522	0.9854	-0.16552	0.86866	0.95916	Lipid	Androgenic Steroids
andro steroid monosulfate C19H28O6S (1)*	1.1647	0.24599	0.92246	0.61164	0.54128	0.85578	Lipid	Androgenic Steroids
androstenediol (3alpha, 17alpha) monosulfate (2)	0.030346	0.97583	0.99874	-0.84901	0.39661	0.78501	Lipid	Androgenic Steroids
androstenediol (3alpha, 17alpha) monosulfate (3)	-0.81594	0.41583	0.93466	-0.54725	0.58465	0.8743	Lipid	Androgenic Steroids
androstenediol (3beta,17beta) disulfate (1)	0.84542	0.39923	0.93466	1.8079	0.071711	0.53286	Lipid	Androgenic Steroids
androstenediol (3beta,17beta) disulfate (2)	0.35231	0.72511	0.99212	1.2492	0.21265	0.65536	Lipid	Androgenic Steroids
androstenediol (3beta,17beta) monosulfate (1)	-0.40893	0.68318	0.9854	-0.081405	0.93518	0.97923	Lipid	Androgenic Steroids
androstenediol (3beta,17beta) monosulfate (2)	1.0531	0.29402	0.92246	0.33791	0.73569	0.90904	Lipid	Androgenic Steroids
androsterone glucuronide	1.211	0.22783	0.92246	-0.92409	0.35625	0.74298	Lipid	Androgenic Steroids
androsterone sulfate	-0.26626	0.79041	0.99269	-0.11013	0.91239	0.97391	Lipid	Androgenic Steroids
16a-hydroxy DHEA 3-sulfate	-0.48438	0.62883	0.97321	0.013913	0.98891	0.99503	Lipid	Androgenic Steroids
dehydroisoandrosterone sulfate (DHEA-S)	-0.45007	0.65332	0.9819	-0.41754	0.67661	0.89754	Lipid	Androgenic Steroids
epiandrosterone sulfate	-0.59558	0.55236	0.96316	-0.79208	0.429	0.79976	Lipid	Androgenic Steroids
etiocholanolone glucuronide	0.71171	0.47776	0.94877	0.033663	0.97317	0.9861	Lipid	Androgenic Steroids
propionylglycine (C3)	-0.91995	0.35909	0.93466	-0.25419	0.79954	0.94048	Lipid	BCAA Metabolism
methylmalonate (MMA)	1.7076	0.089793	0.92246	1.2493	0.21263	0.65536	Lipid	BCAA Metabolism
carnitine	-0.82221	0.41227	0.93466	0.22906	0.81899	0.94048	Lipid	Carnitine Metabolism
deoxycarnitine	1.2748	0.20435	0.92246	0.22749	0.82021	0.94048	Lipid	Carnitine Metabolism
ceramide (d16:1/24:1, d18:1/22:1)*	-0.095004	0.92444	0.99269	0.95562	0.3401	0.73734	Lipid	Ceramides
ceramide (d18:1/14:0, d16:1/16:0)*	-0.082821	0.93411	0.99556	1.3914	0.16524	0.62526	Lipid	Ceramides
ceramide (d18:1/17:0, d17:1/18:0)*	-1.343	0.1813	0.92246	1.0685	0.28624	0.70229	Lipid	Ceramides
ceramide (d18:1/20:0, d16:1/22:0, d20:1/18:0)*	-0.16725	0.8674	0.99269	0.48161	0.63046	0.88118	Lipid	Ceramides
ceramide (d18:2/24:1, d18:1/24:2)*	-1.0691	0.28675	0.92246	0.50042	0.61718	0.87798	Lipid	Ceramides
N-behenoyl-sphingadienine (d18:2/22:0)*	0.037157	0.97041	0.99874	-0.11234	0.91064	0.97355	Lipid	Ceramides
N-palmitoyl-heptadecasphingosine (d17:1/16:0)*	-0.79752	0.42642	0.93466	0.6423	0.52121	0.8498	Lipid	Ceramides
N-palmitoyl-sphingadienine (d18:2/16:0)*	-0.062945	0.94989	0.99874	1.1572	0.2482	0.67303	Lipid	Ceramides
N-palmitoyl-sphingosine (d18:1/16:0)	-0.67691	0.49951	0.95262	1.0301	0.30385	0.71907	Lipid	Ceramides
N-stearoyl-sphingadienine (d18:2/18:0)*	0.27458	0.78402	0.99269	1.368	0.17242	0.62679	Lipid	Ceramides
N-stearoyl-sphingosine (d18:1/18:0)*	-1.6644	0.098144	0.92246	1.1453	0.25309	0.67422	Lipid	Ceramides
cortisol	1.6567	0.099686	0.92246	-0.69687	0.48647	0.83212	Lipid	Corticosteroids
cortisol 21-glucuronide	1.2252	0.22244	0.92246	-0.3182	0.75058	0.91659	Lipid	Corticosteroids
cortisone	0.38777	0.69874	0.9854	-0.63249	0.52759	0.85369	Lipid	Corticosteroids
diacylglycerol (14:0/18:1, 16:0/16:1) [1]*	0.9074	0.36566	0.93466	0.67374	0.50104	0.83707	Lipid	Diacylglycerol
diacylglycerol (14:0/18:1, 16:0/16:1) [2]*	0.77352	0.44044	0.93466	1.0928	0.27542	0.6939	Lipid	Diacylglycerol
diacylglycerol (16:1/18:2 [2], 16:0/18:3 [1])*	-1.0122	0.31311	0.92246	0.90938	0.36395	0.7518	Lipid	Diacylglycerol
linoleoyl-arachidonoyl-glycerol (18:2/20:4) [1]*	-0.84662	0.39856	0.93466	-0.68655	0.49295	0.83442	Lipid	Diacylglycerol
linoleoyl-arachidonoyl-glycerol (18:2/20:4) [2]*	0.2149	0.83014	0.99269	-0.66549	0.50629	0.83848	Lipid	Diacylglycerol
linoleoyl-linolenoyl-glycerol (18:2/18:3) [2]*	-1.2963	0.19687	0.92246	-0.56988	0.56923	0.86583	Lipid	Diacylglycerol
linoleoyl-linoleoyl-glycerol (18:2/18:2) [1]*	-0.2241	0.82298	0.99269	0.22532	0.8219	0.94048	Lipid	Diacylglycerol
oleoyl-arachidonoyl-glycerol (18:1/20:4) [1]*	0.47354	0.63652	0.9748	0.12151	0.90338	0.96873	Lipid	Diacylglycerol
oleoyl-arachidonoyl-glycerol (18:1/20:4) [2]*	-0.75686	0.45033	0.94306	-0.032739	0.97391	0.9861	Lipid	Diacylglycerol
oleoyl-linolenoyl-glycerol (18:1/18:3) [2]*	0.1531	0.87853	0.99269	0.59937	0.54942	0.86077	Lipid	Diacylglycerol
oleoyl-linoleoyl-glycerol (18:1/18:2) [1]	0.062809	0.95	0.99874	-0.57273	0.5673	0.86551	Lipid	Diacylglycerol
oleoyl-linoleoyl-glycerol (18:1/18:2) [2]	-0.22293	0.8239	0.99269	-0.44717	0.6551	0.8878	Lipid	Diacylglycerol
oleoyl-oleoyl-glycerol (18:1/18:1) [1]*	-0.18297	0.85507	0.99269	0.33531	0.73765	0.90909	Lipid	Diacylglycerol
oleoyl-oleoyl-glycerol (18:1/18:1) [2]*	-0.81729	0.41507	0.93466	0.74693	0.45575	0.81081	Lipid	Diacylglycerol
palmitoleoyl-arachidonoyl-glycerol (16:1/20:4) [2]*	-1.8244	0.070092	0.92246	-0.13623	0.89174	0.96712	Lipid	Diacylglycerol
palmitoleoyl-linoleoyl-glycerol (16:1/18:2) [1]*	-0.7878	0.43207	0.93466	-0.12124	0.90359	0.96873	Lipid	Diacylglycerol
palmitoyl-arachidonoyl-glycerol (16:0/20:4) [1]*	-0.16045	0.87274	0.99269	0.13189	0.89517	0.96761	Lipid	Diacylglycerol
palmitoyl-arachidonoyl-glycerol (16:0/20:4) [2]*	-0.26995	0.78757	0.99269	-1.1147	0.26596	0.6824	Lipid	Diacylglycerol
palmitoyl-linoleoyl-glycerol (16:0/18:2) [1]*	0.059315	0.95278	0.99874	-1.3649	0.17339	0.62679	Lipid	Diacylglycerol
palmitoyl-linoleoyl-glycerol (16:0/18:2) [2]*	0.21916	0.82683	0.99269	-0.86217	0.38934	0.77949	Lipid	Diacylglycerol
palmitoyl-oleoyl-glycerol (16:0/18:1) [1]*	0.39488	0.69349	0.9854	0.044831	0.96427	0.9855	Lipid	Diacylglycerol
palmitoyl-oleoyl-glycerol (16:0/18:1) [2]*	-0.6223	0.53469	0.96316	0.086408	0.93121	0.97923	Lipid	Diacylglycerol
palmitoyl-palmitoyl-glycerol (16:0/16:0) [2]*	-0.11672	0.90724	0.99269	-0.080753	0.9357	0.97923	Lipid	Diacylglycerol
stearoyl-arachidonoyl-glycerol (18:0/20:4) [1]*	-1.0336	0.30298	0.92246	1.2921	0.19741	0.6456	Lipid	Diacylglycerol
stearoyl-arachidonoyl-glycerol (18:0/20:4) [2]*	-0.66736	0.50558	0.95262	-0.34169	0.73285	0.90904	Lipid	Diacylglycerol
N-palmitoyl-sphinganine (d18:0/16:0)	0.27617	0.7828	0.99269	0.15055	0.88044	0.96223	Lipid	Dihydroceramides
N-stearoyl-sphinganine (d18:0/18:0)*	-0.54913	0.58374	0.9671	0.21813	0.82749	0.94086	Lipid	Dihydroceramides
behenoyl dihydrosphingomyelin (d18:0/22:0)*	-1.1498	0.25206	0.92246	-1.6514	0.099805	0.56179	Lipid	Dihydrosphingomyelins
myristoyl dihydrosphingomyelin (d18:0/14:0)*	0.0528	0.95796	0.99874	-2.1007	0.036573	0.49979	Lipid	Dihydrosphingomyelins
palmitoyl dihydrosphingomyelin (d18:0/16:0)*	-0.24538	0.8065	0.99269	-1.9681	0.050066	0.50127	Lipid	Dihydrosphingomyelins
sphingomyelin (d18:0/18:0, d19:0/17:0)*	-0.98715	0.32517	0.92246	-1.3403	0.18124	0.63565	Lipid	Dihydrosphingomyelins
sphingomyelin (d18:0/20:0, d16:0/22:0)*	-0.43445	0.66459	0.9854	-1.5766	0.11603	0.5918	Lipid	Dihydrosphingomyelins
leukotriene B4	0.25803	0.79674	0.99269	-0.59451	0.55266	0.86077	Lipid	Eicosanoid
arachidonoyl ethanolamide	-0.061773	0.95083	0.99874	-0.057934	0.95384	0.98357	Lipid	Endocannabinoid
linoleoyl ethanolamide	0.38225	0.70282	0.9854	1.0052	0.31569	0.71957	Lipid	Endocannabinoid
N-oleoylserine	0.80498	0.42212	0.93466	1.803	0.072475	0.53286	Lipid	Endocannabinoid
N-oleoyltaurine	1.8618	0.0646	0.92246	0.92702	0.35473	0.7422	Lipid	Endocannabinoid
N-palmitoylserine	1.43	0.15481	0.92246	-0.35904	0.71984	0.90584	Lipid	Endocannabinoid
N-stearoyltaurine	-0.60453	0.54641	0.96316	-0.77371	0.43976	0.8045	Lipid	Endocannabinoid
estrone 3-sulfate	0.81441	0.41671	0.93466	0.96899	0.3334	0.73665	Lipid	Estrogenic Steroids
arachidonoylcholine	0.39833	0.69096	0.9854	-1.3156	0.18939	0.63859	Lipid	Fatty Acid Metabolism (Acyl Choline)
dihomo-linolenoyl-choline	1.9347	0.054925	0.92246	-1.7204	0.086484	0.5423	Lipid	Fatty Acid Metabolism (Acyl Choline)
docosahexaenoylcholine	-0.36527	0.71543	0.98771	-1.5559	0.12087	0.59903	Lipid	Fatty Acid Metabolism (Acyl Choline)
linoleoylcholine*	1.0369	0.30147	0.92246	-1.2578	0.20954	0.65482	Lipid	Fatty Acid Metabolism (Acyl Choline)
oleoylcholine	1.3422	0.18157	0.92246	-0.67537	0.50001	0.83707	Lipid	Fatty Acid Metabolism (Acyl Choline)
palmitoylcholine	0.5792	0.56333	0.96316	-1.2287	0.22025	0.66022	Lipid	Fatty Acid Metabolism (Acyl Choline)
stearoylcholine*	0.87557	0.38267	0.93466	-1.5182	0.13012	0.59937	Lipid	Fatty Acid Metabolism (Acyl Choline)
hexanoylglutamine	1.2457	0.21485	0.92246	1.0564	0.29172	0.70229	Lipid	Fatty Acid Metabolism (Acyl Glutamine)
hexanoylglycine (C6)	2.044	0.042715	0.92246	-0.1641	0.86977	0.95931	Lipid	Fatty Acid Metabolism(Acyl Glycine)
N-palmitoylglycine	0.58075	0.56229	0.96316	1.393	0.16474	0.62526	Lipid	Fatty Acid Metabolism(Acyl Glycine)
trans-2-hexenoylglycine	1.6493	0.1012	0.92246	1.2598	0.20881	0.65463	Lipid	Fatty Acid Metabolism(Acyl Glycine)
stearamide (18:0)	-0.21783	0.82786	0.99269	-0.70167	0.48348	0.82991	Lipid	Fatty Acid, Amide
2-aminoheptanoate	0.5075	0.61255	0.96984	0.25008	0.80271	0.94048	Lipid	Fatty Acid, Amino
2-aminooctanoate	-0.21233	0.83214	0.99269	-0.092363	0.92648	0.97923	Lipid	Fatty Acid, Amino
N-acetyl-2-aminooctanoate*	1.4736	0.1427	0.92246	-0.077076	0.93862	0.98087	Lipid	Fatty Acid, Amino
2-hydroxyphytanate*	0.55467	0.57995	0.96633	0.22207	0.82443	0.94068	Lipid	Fatty Acid, Branched
15-methylpalmitate (i17:0)	-0.7252	0.46946	0.94877	0.63105	0.52853	0.85369	Lipid	Fatty Acid, Branched
17-methylstearate (i19:0)	0.86322	0.3894	0.93466	1.2106	0.2271	0.66716	Lipid	Fatty Acid, Branched
pristanate	1.3381	0.18289	0.92246	0.049743	0.96036	0.98357	Lipid	Fatty Acid, Branched
2-hydroxyadipate	0.0029028	0.99769	0.99874	1.6379	0.10258	0.56179	Lipid	Fatty Acid, Dicarboxylate
2-hydroxyglutarate	1.4976	0.13636	0.92246	0.71158	0.47733	0.82517	Lipid	Fatty Acid, Dicarboxylate
3-carboxy-4-methyl-5-pentyl-2-furanpropionate (3-CMPFP)	1.0344	0.30261	0.92246	-0.46634	0.64134	0.88498	Lipid	Fatty Acid, Dicarboxylate
3-carboxy-4-methyl-5-propyl-2-furanpropanoate (CMPF)	0.77748	0.43811	0.93466	-0.49865	0.61843	0.87798	Lipid	Fatty Acid, Dicarboxylate
3-hydroxyadipate*	1.3563	0.17704	0.92246	1.6957	0.091079	0.5448	Lipid	Fatty Acid, Dicarboxylate
3-methyladipate	1.4946	0.13713	0.92246	1.4921	0.13682	0.59965	Lipid	Fatty Acid, Dicarboxylate
4-hydroxy-2-oxoglutaric acid	-0.6321	0.52829	0.96178	-1.5683	0.11796	0.59592	Lipid	Fatty Acid, Dicarboxylate
adipate	1.5211	0.13035	0.92246	0.77203	0.44076	0.8045	Lipid	Fatty Acid, Dicarboxylate
azelate (nonanedioate; C9)	-0.457	0.64833	0.97787	0.23728	0.81262	0.94048	Lipid	Fatty Acid, Dicarboxylate
docosadioate (C22-DC)	0.44555	0.65657	0.98384	1.3681	0.17241	0.62679	Lipid	Fatty Acid, Dicarboxylate
dodecadienoate (12:2)*	-0.58531	0.55923	0.96316	1.0625	0.28894	0.70229	Lipid	Fatty Acid, Dicarboxylate
dodecanedioate (C12)	1.0158	0.31139	0.92246	1.3914	0.16524	0.62526	Lipid	Fatty Acid, Dicarboxylate
dodecenedioate (C12:1-DC)*	1.0677	0.28739	0.92246	1.4802	0.13997	0.60121	Lipid	Fatty Acid, Dicarboxylate
eicosanodioate (C20-DC)	1.103	0.27179	0.92246	1.6861	0.092918	0.5467	Lipid	Fatty Acid, Dicarboxylate
glutarate (C5-DC)	0.72827	0.46759	0.94877	1.6762	0.094834	0.5467	Lipid	Fatty Acid, Dicarboxylate
heptenedioate (C7:1-DC)*	0.096982	0.92287	0.99269	1.1956	0.2329	0.6706	Lipid	Fatty Acid, Dicarboxylate
hexadecanedioate (C16)	0.68719	0.49303	0.95262	1.4899	0.13741	0.59965	Lipid	Fatty Acid, Dicarboxylate
hexadecenedioate (C16:1-DC)*	0.86357	0.38921	0.93466	1.9511	0.052063	0.50259	Lipid	Fatty Acid, Dicarboxylate
hydroxy-CMPF*	0.035311	0.97188	0.99874	-0.4811	0.63083	0.88118	Lipid	Fatty Acid, Dicarboxylate
maleate	0.84338	0.40037	0.93466	-1.469	0.14297	0.6019	Lipid	Fatty Acid, Dicarboxylate
octadecadienedioate (C18:2-DC)*	0.51801	0.60522	0.96738	0.098567	0.92155	0.97797	Lipid	Fatty Acid, Dicarboxylate
octadecanedioate (C18)	0.87793	0.38139	0.93466	0.45286	0.651	0.88498	Lipid	Fatty Acid, Dicarboxylate
octadecenedioate (C18:1-DC)*	0.59602	0.55207	0.96316	0.98432	0.32582	0.72695	Lipid	Fatty Acid, Dicarboxylate
sebacate (C10-DC)	1.3705	0.1726	0.92246	1.3228	0.18701	0.63842	Lipid	Fatty Acid, Dicarboxylate
suberate (C8-DC)	1.1603	0.2478	0.92246	1.8489	0.065546	0.53286	Lipid	Fatty Acid, Dicarboxylate
tetradecanedioate (C14)	0.97857	0.32938	0.92246	2.1738	0.030571	0.48299	Lipid	Fatty Acid, Dicarboxylate
9,10-DiHOME	0.68537	0.49417	0.95262	1.4397	0.1511	0.61535	Lipid	Fatty Acid, Dihydroxy
12,13-DiHOME	-0.27498	0.78371	0.99269	1.3323	0.18386	0.63723	Lipid	Fatty Acid, Dihydroxy
2-hydroxyarachidate*	0.25215	0.80127	0.99269	2.4062	0.016779	0.42682	Lipid	Fatty Acid, Monohydroxy
2-hydroxybehenate	2.1655	0.031939	0.92246	2.1284	0.034196	0.49979	Lipid	Fatty Acid, Monohydroxy
2-hydroxydecanoate	0.17203	0.86364	0.99269	2.3351	0.020259	0.42682	Lipid	Fatty Acid, Monohydroxy
2-hydroxylaurate	0.96851	0.33436	0.92246	-0.35788	0.7207	0.90584	Lipid	Fatty Acid, Monohydroxy
2-hydroxynervonate*	1.2125	0.22725	0.92246	2.452	0.014827	0.42682	Lipid	Fatty Acid, Monohydroxy
2-hydroxyoctanoate	1.08	0.28191	0.92246	0.67236	0.50192	0.83707	Lipid	Fatty Acid, Monohydroxy
2-hydroxypalmitate	2.5317	0.012387	0.92246	0.47971	0.63182	0.88118	Lipid	Fatty Acid, Monohydroxy
2-hydroxystearate	0.77199	0.44134	0.93466	-0.081096	0.93542	0.97923	Lipid	Fatty Acid, Monohydroxy
3-hydroxydecanoate	0.22985	0.81852	0.99269	0.90023	0.36879	0.75858	Lipid	Fatty Acid, Monohydroxy
3-hydroxyhexanoate	0.95535	0.34095	0.92246	0.67181	0.50227	0.83707	Lipid	Fatty Acid, Monohydroxy
3-hydroxylaurate	-0.71615	0.47502	0.94877	1.3004	0.19457	0.64175	Lipid	Fatty Acid, Monohydroxy
3-hydroxymyristate	0.046585	0.96291	0.99874	1.1246	0.26173	0.6816	Lipid	Fatty Acid, Monohydroxy
3-hydroxyoctanoate	-0.24361	0.80787	0.99269	0.45654	0.64837	0.88498	Lipid	Fatty Acid, Monohydroxy
3-hydroxyoleate*	0.58456	0.55973	0.96316	0.9679	0.33395	0.73665	Lipid	Fatty Acid, Monohydroxy
3-hydroxystearate	0.86566	0.38807	0.93466	0.91631	0.36031	0.74745	Lipid	Fatty Acid, Monohydroxy
5-hydroxyhexanoate	0.69264	0.48961	0.95262	1.2058	0.22895	0.66716	Lipid	Fatty Acid, Monohydroxy
5-hydroxyvalproate	0.39748	0.69158	0.9854	-0.3727	0.70966	0.90584	Lipid	Fatty Acid, Monohydroxy
13-HODE + 9-HODE	-0.66101	0.50962	0.95262	0.6769	0.49904	0.83707	Lipid	Fatty Acid, Monohydroxy
16-hydroxypalmitate	-0.14015	0.88873	0.99269	1.5207	0.1295	0.59937	Lipid	Fatty Acid, Monohydroxy
glycerol	0.19706	0.84405	0.99269	0.16142	0.87188	0.95934	Lipid	Glycerolipid Metabolism
glycerol 3-phosphate	-0.16524	0.86898	0.99269	0.54459	0.58648	0.8743	Lipid	Glycerolipid Metabolism
glycerophosphoglycerol	0.8472	0.39824	0.93466	0.80192	0.42329	0.79827	Lipid	Glycerolipid Metabolism
glycosyl ceramide (d18:1/20:0, d16:1/22:0)*	0.52633	0.59944	0.96738	-1.4267	0.1548	0.62526	Lipid	Hexosylceramides (HCER)
glycosyl ceramide (d18:1/23:1, d17:1/24:1)*	1.1483	0.25269	0.92246	-1.1801	0.239	0.6706	Lipid	Hexosylceramides (HCER)
glycosyl ceramide (d18:2/24:1, d18:1/24:2)*	0.47747	0.63373	0.9748	-1.4071	0.16052	0.62526	Lipid	Hexosylceramides (HCER)
glycosyl-N-(2-hydroxynervonoyl)-sphingosine (d18:1/24:1(2OH))*	0.94589	0.34574	0.92513	-1.6474	0.10061	0.56179	Lipid	Hexosylceramides (HCER)
glycosyl-N-behenoyl-sphingadienine (d18:2/22:0)*	0.77581	0.43909	0.93466	-1.2277	0.22063	0.66022	Lipid	Hexosylceramides (HCER)
glycosyl-N-palmitoyl-sphingosine (d18:1/16:0)	0.3149	0.75328	0.99269	-1.9885	0.047745	0.50127	Lipid	Hexosylceramides (HCER)
glycosyl-N-stearoyl-sphingosine (d18:1/18:0)	-0.042653	0.96604	0.99874	-0.57783	0.56385	0.8644	Lipid	Hexosylceramides (HCER)
myo-inositol	0.21793	0.82778	0.99269	0.43079	0.66696	0.89202	Lipid	Inositol Metabolism
3-hydroxybutyrate (BHBA)	0.14168	0.88753	0.99269	-0.23713	0.81273	0.94048	Lipid	Ketone Bodies
acetoacetate	0.64038	0.52291	0.95556	-0.051159	0.95924	0.98357	Lipid	Ketone Bodies
lactosyl-N-behenoyl-sphingosine (d18:1/22:0)*	0.57505	0.56612	0.96316	-0.80733	0.42018	0.79548	Lipid	Lactosylceramides (LCER)
lactosyl-N-nervonoyl-sphingosine (d18:1/24:1)*	0.52108	0.60308	0.96738	-0.76599	0.44434	0.8045	Lipid	Lactosylceramides (LCER)
lactosyl-N-palmitoyl-sphingosine (d18:1/16:0)	0.090634	0.9279	0.99316	-1.4061	0.16082	0.62526	Lipid	Lactosylceramides (LCER)
10-heptadecenoate (17:1n7)	1.1534	0.2506	0.92246	1.4152	0.15814	0.62526	Lipid	Long Chain Fatty Acid
10-nonadecenoate (19:1n9)	0.28832	0.7735	0.99269	1.5744	0.11654	0.5918	Lipid	Long Chain Fatty Acid
arachidate (20:0)	0.47045	0.63872	0.97511	2.2442	0.025618	0.45471	Lipid	Long Chain Fatty Acid
eicosenoate (20:1n9 or 1n11)	0.99276	0.32243	0.92246	1.8719	0.062277	0.53286	Lipid	Long Chain Fatty Acid
erucate (22:1n9)	0.24229	0.80889	0.99269	2.6648	0.0081576	0.42682	Lipid	Long Chain Fatty Acid
margarate (17:0)	0.086287	0.93135	0.99556	1.0569	0.29147	0.70229	Lipid	Long Chain Fatty Acid
myristate (14:0)	-0.18306	0.855	0.99269	1.3946	0.16425	0.62526	Lipid	Long Chain Fatty Acid
myristoleate (14:1n5)	0.2088	0.83489	0.99269	1.8463	0.065927	0.53286	Lipid	Long Chain Fatty Acid
nonadecanoate (19:0)	0.23823	0.81203	0.99269	1.5113	0.13187	0.59937	Lipid	Long Chain Fatty Acid
oleate/vaccenate (18:1)	-0.14668	0.88359	0.99269	1.7442	0.082241	0.5423	Lipid	Long Chain Fatty Acid
palmitate (16:0)	0.43631	0.66325	0.9854	1.0199	0.30866	0.71957	Lipid	Long Chain Fatty Acid
palmitoleate (16:1n7)	-0.20303	0.83939	0.99269	1.991	0.047469	0.50127	Lipid	Long Chain Fatty Acid
pentadecanoate (15:0)	-0.10575	0.91592	0.99269	0.92189	0.35739	0.74298	Lipid	Long Chain Fatty Acid
stearate (18:0)	0.34812	0.72824	0.99212	1.5311	0.12689	0.59937	Lipid	Long Chain Fatty Acid
1-stearoyl-GPE (18:0)	-0.11786	0.90634	0.99269	-1.6772	0.094631	0.5467	Lipid	Lysophospholipid
1-stearoyl-GPI (18:0)	2.1149	0.036099	0.92246	-0.032664	0.97397	0.9861	Lipid	Lysophospholipid
2-stearoyl-GPE (18:0)*	-0.33355	0.73919	0.99212	-0.93948	0.34831	0.74102	Lipid	Lysophospholipid
1-arachidonoyl-GPE (20:4n6)*	-0.51095	0.61014	0.96946	-2.2008	0.028583	0.47234	Lipid	Lysophospholipid
1-arachidonoyl-GPI* (20:4)*	1.3123	0.19145	0.92246	-0.074101	0.94098	0.98124	Lipid	Lysophospholipid
1-cerotoyl-GPC (26:0)*	0.67479	0.50085	0.95262	-2.2773	0.023535	0.44994	Lipid	Lysophospholipid
1-linoleoyl-GPA (18:2)*	0.070026	0.94427	0.99874	-1.5078	0.13275	0.59937	Lipid	Lysophospholipid
1-linoleoyl-GPE (18:2)*	-0.13814	0.89031	0.99269	-2.7887	0.005662	0.36803	Lipid	Lysophospholipid
1-linoleoyl-GPG (18:2)*	1.5551	0.12204	0.92246	-0.5482	0.584	0.8743	Lipid	Lysophospholipid
1-linoleoyl-GPI* (18:2)*	0.59916	0.54998	0.96316	-1.1821	0.2382	0.6706	Lipid	Lysophospholipid
1-oleoyl-GPE (18:1)	0.85585	0.39346	0.93466	-2.0206	0.044294	0.50127	Lipid	Lysophospholipid
1-oleoyl-GPG (18:1)*	1.6246	0.10637	0.92246	-1.697	0.09083	0.5448	Lipid	Lysophospholipid
1-oleoyl-GPI (18:1)*	2.3404	0.02059	0.92246	0.61721	0.5376	0.85578	Lipid	Lysophospholipid
1-palmitoyl-GPA (16:0)	0.024644	0.98037	0.99874	-0.56377	0.57337	0.86807	Lipid	Lysophospholipid
1-palmitoyl-GPE (16:0)	-0.004745	0.99622	0.99874	-2.0154	0.044838	0.50127	Lipid	Lysophospholipid
1-palmitoyl-GPG (16:0)*	1.8738	0.062922	0.92246	-0.16022	0.87282	0.95934	Lipid	Lysophospholipid
1-palmitoyl-GPI* (16:0)	1.1269	0.26161	0.92246	-0.6339	0.52667	0.85369	Lipid	Lysophospholipid
1-stearoyl-GPC (18:0)	-0.48501	0.62838	0.97321	-1.8276	0.068692	0.53286	Lipid	Lysophospholipid - Lysophosphatidylcholine
2-palmitoyl-GPC* (16:0)*	-0.67501	0.50072	0.95262	-2.4988	0.013045	0.42682	Lipid	Lysophospholipid - Lysophosphatidylcholine
1-arachidonoyl-GPC* (20:4)*	0.33905	0.73505	0.99212	-1.7737	0.07722	0.5423	Lipid	Lysophospholipid - Lysophosphatidylcholine
1-lignoceroyl-GPC (24:0)	-0.26249	0.7933	0.99269	-1.7163	0.087229	0.5423	Lipid	Lysophospholipid - Lysophosphatidylcholine
1-linolenoyl-GPC (18:3)*	-0.6786	0.49844	0.95262	-1.5608	0.11972	0.59903	Lipid	Lysophospholipid - Lysophosphatidylcholine
1-linoleoyl-GPC (18:2)	0.1888	0.8505	0.99269	-2.2356	0.02618	0.45471	Lipid	Lysophospholipid - Lysophosphatidylcholine
1-oleoyl-GPC (18:1)	0.092804	0.92618	0.99269	-1.3317	0.18406	0.63723	Lipid	Lysophospholipid - Lysophosphatidylcholine
1-palmitoleoyl-GPC* (16:1)*	-0.32623	0.74471	0.99269	-1.4493	0.1484	0.61051	Lipid	Lysophospholipid - Lysophosphatidylcholine
1-palmitoyl-GPC (16:0)	-0.81978	0.41365	0.93466	-2.3435	0.019816	0.42682	Lipid	Lysophospholipid - Lysophosphatidylcholine
1-(1-enyl-palmitoyl)-GPC (P-16:0)*	-0.59929	0.54989	0.96316	-2.387	0.017661	0.42682	Lipid	Lysoplasmalogen
1-(1-enyl-palmitoyl)-GPE (P-16:0)*	-0.78006	0.43659	0.93466	-2.5013	0.012955	0.42682	Lipid	Lysoplasmalogen
1-(1-enyl-stearoyl)-GPE (P-18:0)*	-1.7077	0.08978	0.92246	-2.6076	0.0096168	0.42682	Lipid	Lysoplasmalogen
1-(1-enyl-oleoyl)-GPE (P-18:1)*	-0.50602	0.61359	0.96984	-2.2238	0.026973	0.45471	Lipid	Lysoplasmalogen
5-dodecenoate (12:1n7)	0.4671	0.64111	0.97721	1.7096	0.088459	0.54244	Lipid	Medium Chain Fatty Acid
10-undecenoate (11:1n1)	-0.17279	0.86305	0.99269	-0.12921	0.89729	0.96784	Lipid	Medium Chain Fatty Acid
caprate (10:0)	0.24497	0.80682	0.99269	1.6751	0.095057	0.5467	Lipid	Medium Chain Fatty Acid
caproate (6:0)	-0.95258	0.34234	0.92366	-0.39524	0.69297	0.90049	Lipid	Medium Chain Fatty Acid
caprylate (8:0)	0.25938	0.7957	0.99269	1.1674	0.24405	0.67303	Lipid	Medium Chain Fatty Acid
heptanoate (7:0)	0.69973	0.48519	0.95262	0.37622	0.70704	0.90584	Lipid	Medium Chain Fatty Acid
laurate (12:0)	-0.063903	0.94913	0.99874	1.7128	0.08788	0.5423	Lipid	Medium Chain Fatty Acid
pelargonate (9:0)	1.2601	0.2096	0.92246	0.12786	0.89835	0.96784	Lipid	Medium Chain Fatty Acid
3-hydroxy-3-methylglutarate	1.2778	0.20332	0.92246	1.4737	0.14171	0.6019	Lipid	Mevalonate Metabolism
2-linoleoylglycerol (18:2)	2.2386	0.026666	0.92246	0.45188	0.65171	0.88498	Lipid	Monoacylglycerol
2-oleoylglycerol (18:1)	1.7505	0.082084	0.92246	0.0096756	0.99229	0.99559	Lipid	Monoacylglycerol
1-dihomo-linolenylglycerol (20:3)	1.0302	0.30459	0.92246	0.38904	0.69755	0.9032	Lipid	Monoacylglycerol
1-dihomo-linoleoylglycerol (20:2)	2.1423	0.033793	0.92246	0.03606	0.97126	0.9861	Lipid	Monoacylglycerol
1-docosahexaenoylglycerol (22:6)	1.7607	0.080349	0.92246	1.3938	0.1645	0.62526	Lipid	Monoacylglycerol
1-linolenoylglycerol (18:3)	0.48753	0.6266	0.97321	0.68697	0.49268	0.83442	Lipid	Monoacylglycerol
1-linoleoylglycerol (18:2)	1.3158	0.19027	0.92246	0.64801	0.51752	0.84662	Lipid	Monoacylglycerol
1-myristoylglycerol (14:0)	1.7697	0.078826	0.92246	0.71466	0.47542	0.82517	Lipid	Monoacylglycerol
1-oleoylglycerol (18:1)	2.0107	0.046161	0.92246	0.75117	0.45319	0.80811	Lipid	Monoacylglycerol
1-palmitoleoylglycerol (16:1)*	1.8191	0.070906	0.92246	1.0844	0.27916	0.69969	Lipid	Monoacylglycerol
1-palmitoylglycerol (16:0)	1.5002	0.13569	0.92246	-0.30634	0.75958	0.91913	Lipid	Monoacylglycerol
1-stearoyl-2-arachidonoyl-GPC (18:0/20:4)	-0.2958	0.7678	0.99269	-0.45258	0.65121	0.88498	Lipid	Phosphatidylcholine (PC)
1-stearoyl-2-docosahexaenoyl-GPC (18:0/22:6)	0.18138	0.85632	0.99269	-1.0064	0.31513	0.71957	Lipid	Phosphatidylcholine (PC)
1-stearoyl-2-linoleoyl-GPC (18:0/18:2)*	-0.71164	0.4778	0.94877	-1.0747	0.28345	0.70229	Lipid	Phosphatidylcholine (PC)
1-stearoyl-2-oleoyl-GPC (18:0/18:1)	0.70389	0.4826	0.9496	0.78139	0.43524	0.8045	Lipid	Phosphatidylcholine (PC)
1,2-dilinoleoyl-GPC (18:2/18:2)	0.69224	0.48986	0.95262	-1.8447	0.066149	0.53286	Lipid	Phosphatidylcholine (PC)
1,2-dipalmitoyl-GPC (16:0/16:0)	-1.2728	0.20507	0.92246	-0.31101	0.75603	0.91797	Lipid	Phosphatidylcholine (PC)
1-linoleoyl-2-linolenoyl-GPC (18:2/18:3)*	0.21192	0.83246	0.99269	-1.5451	0.12348	0.59903	Lipid	Phosphatidylcholine (PC)
1-myristoyl-2-arachidonoyl-GPC (14:0/20:4)*	0.10843	0.9138	0.99269	-0.50844	0.61155	0.87798	Lipid	Phosphatidylcholine (PC)
1-myristoyl-2-palmitoyl-GPC (14:0/16:0)	-0.23324	0.8159	0.99269	0.46288	0.64381	0.88498	Lipid	Phosphatidylcholine (PC)
1-oleoyl-2-docosahexaenoyl-GPC (18:1/22:6)*	-0.11348	0.9098	0.99269	-0.3224	0.74739	0.91659	Lipid	Phosphatidylcholine (PC)
1-palmitoleoyl-2-linolenoyl-GPC (16:1/18:3)*	0.72786	0.46784	0.94877	0.47942	0.63202	0.88118	Lipid	Phosphatidylcholine (PC)
1-palmitoyl-2-arachidonoyl-GPC (16:0/20:4n6)	-0.12723	0.89893	0.99269	-0.95142	0.34223	0.73734	Lipid	Phosphatidylcholine (PC)
1-palmitoyl-2-docosahexaenoyl-GPC (16:0/22:6)	0.57945	0.56316	0.96316	-1.5023	0.13416	0.59937	Lipid	Phosphatidylcholine (PC)
1-palmitoyl-2-linoleoyl-GPC (16:0/18:2)	0.20301	0.8394	0.99269	-1.1221	0.26282	0.6816	Lipid	Phosphatidylcholine (PC)
1-palmitoyl-2-oleoyl-GPC (16:0/18:1)	-0.2946	0.76871	0.99269	0.20043	0.84129	0.94175	Lipid	Phosphatidylcholine (PC)
1-palmitoyl-2-palmitoleoyl-GPC (16:0/16:1)*	-0.06231	0.9504	0.99874	1.732	0.084396	0.5423	Lipid	Phosphatidylcholine (PC)
1-palmitoyl-2-stearoyl-GPC (16:0/18:0)	0.21034	0.83369	0.99269	-1.6372	0.10274	0.56179	Lipid	Phosphatidylcholine (PC)
1-stearoyl-2-arachidonoyl-GPE (18:0/20:4)	0.95907	0.33908	0.92246	0.19153	0.84825	0.94627	Lipid	Phosphatidylethanolamine (PE)
1-stearoyl-2-docosahexaenoyl-GPE (18:0/22:6)*	1.0777	0.28292	0.92246	0.65803	0.51107	0.84171	Lipid	Phosphatidylethanolamine (PE)
1-stearoyl-2-linoleoyl-GPE (18:0/18:2)*	0.5309	0.59628	0.9671	-0.087077	0.93067	0.97923	Lipid	Phosphatidylethanolamine (PE)
1-stearoyl-2-oleoyl-GPE (18:0/18:1)	0.50089	0.61718	0.96984	0.59579	0.55181	0.86077	Lipid	Phosphatidylethanolamine (PE)
1,2-dilinoleoyl-GPE (18:2/18:2)*	-0.022977	0.9817	0.99874	-1.545	0.12349	0.59903	Lipid	Phosphatidylethanolamine (PE)
1,2-dipalmitoyl-GPE (16:0/16:0)*	-0.55302	0.58108	0.96633	-1.9609	0.050899	0.50127	Lipid	Phosphatidylethanolamine (PE)
1-oleoyl-2-arachidonoyl-GPE (18:1/20:4)*	0.89786	0.37071	0.93466	0.34038	0.73383	0.90904	Lipid	Phosphatidylethanolamine (PE)
1-oleoyl-2-docosahexaenoyl-GPE (18:1/22:6)*	0.9863	0.32558	0.92246	0.73356	0.46384	0.81615	Lipid	Phosphatidylethanolamine (PE)
1-oleoyl-2-linoleoyl-GPE (18:1/18:2)*	0.43447	0.66458	0.9854	-0.13995	0.8888	0.96712	Lipid	Phosphatidylethanolamine (PE)
1-palmitoyl-2-arachidonoyl-GPE (16:0/20:4)*	-0.018939	0.98492	0.99874	-0.20778	0.83556	0.94086	Lipid	Phosphatidylethanolamine (PE)
1-palmitoyl-2-docosahexaenoyl-GPE (16:0/22:6)*	0.96178	0.33772	0.92246	0.37607	0.70716	0.90584	Lipid	Phosphatidylethanolamine (PE)
1-palmitoyl-2-linoleoyl-GPE (16:0/18:2)	1.5942	0.11301	0.92246	-0.096994	0.9228	0.97797	Lipid	Phosphatidylethanolamine (PE)
1-palmitoyl-2-oleoyl-GPE (16:0/18:1)	0.37692	0.70677	0.9854	0.20307	0.83923	0.94086	Lipid	Phosphatidylethanolamine (PE)
1-palmitoyl-2-stearoyl-GPE (16:0/18:0)*	0.67026	0.50373	0.95262	-0.75087	0.45337	0.80811	Lipid	Phosphatidylethanolamine (PE)
1-stearoyl-2-arachidonoyl-GPI (18:0/20:4)	-1.8292	0.069372	0.92246	-0.77042	0.44171	0.8045	Lipid	Phosphatidylinositol (PI)
1-stearoyl-2-linoleoyl-GPI (18:0/18:2)	-0.67493	0.50077	0.95262	-1.8958	0.059041	0.52899	Lipid	Phosphatidylinositol (PI)
1-stearoyl-2-oleoyl-GPI (18:0/18:1)*	0.18624	0.85251	0.99269	-0.59034	0.55545	0.86373	Lipid	Phosphatidylinositol (PI)
1-palmitoyl-2-arachidonoyl-GPI (16:0/20:4)*	-0.98644	0.32552	0.92246	-1.5374	0.12535	0.59915	Lipid	Phosphatidylinositol (PI)
1-palmitoyl-2-linoleoyl-GPI (16:0/18:2)	0.51878	0.60468	0.96738	-1.9899	0.047597	0.50127	Lipid	Phosphatidylinositol (PI)
1-palmitoyl-2-oleoyl-GPI (16:0/18:1)*	-0.77208	0.44129	0.93466	-0.49189	0.62319	0.88118	Lipid	Phosphatidylinositol (PI)
1-stearoyl-2-oleoyl-GPS (18:0/18:1)	-1.0115	0.31341	0.92246	-1.5373	0.12536	0.59915	Lipid	Phosphatidylserine (PS)
choline	1.2873	0.19998	0.92246	-0.015817	0.98739	0.99503	Lipid	Phospholipid Metabolism
glycerophosphoethanolamine	1.2585	0.21019	0.92246	-2.3873	0.017647	0.42682	Lipid	Phospholipid Metabolism
glycerophosphorylcholine (GPC)	0.22211	0.82453	0.99269	-1.8534	0.064891	0.53286	Lipid	Phospholipid Metabolism
phosphocholine	-0.23318	0.81594	0.99269	-1.6359	0.103	0.56179	Lipid	Phospholipid Metabolism
phosphoethanolamine (PE)	-1.351	0.17873	0.92246	-1.4925	0.13672	0.59965	Lipid	Phospholipid Metabolism
trimethylamine N-oxide	0.42234	0.67338	0.9854	1.6139	0.10771	0.57072	Lipid	Phospholipid Metabolism
1-(1-enyl-palmitoyl)-2-palmitoyl-GPC (P-16:0/16:0)*	1.3084	0.19274	0.92246	-1.0033	0.31661	0.71957	Lipid	Plasmalogen
1-(1-enyl-stearoyl)-2-arachidonoyl-GPE (P-18:0/20:4)*	-0.23872	0.81165	0.99269	-3.1254	0.0019656	0.20451	Lipid	Plasmalogen
1-(1-enyl-stearoyl)-2-linoleoyl-GPE (P-18:0/18:2)*	0.53053	0.59653	0.9671	-3.2657	0.0012305	0.20451	Lipid	Plasmalogen
1-(1-enyl-stearoyl)-2-oleoyl-GPE (P-18:0/18:1)	0.019909	0.98414	0.99874	-2.2253	0.026873	0.45471	Lipid	Plasmalogen
1-(1-enyl-palmitoyl)-2-arachidonoyl-GPC (P-16:0/20:4)*	-0.51253	0.60904	0.96929	-1.8273	0.068743	0.53286	Lipid	Plasmalogen
1-(1-enyl-palmitoyl)-2-arachidonoyl-GPE (P-16:0/20:4)*	-0.0071379	0.99431	0.99874	-3.1052	0.0021003	0.20451	Lipid	Plasmalogen
1-(1-enyl-palmitoyl)-2-linoleoyl-GPC (P-16:0/18:2)*	-1.2865	0.20027	0.92246	-2.065	0.039857	0.50127	Lipid	Plasmalogen
1-(1-enyl-palmitoyl)-2-linoleoyl-GPE (P-16:0/18:2)*	-0.52672	0.59917	0.96738	-2.642	0.0087149	0.42682	Lipid	Plasmalogen
1-(1-enyl-palmitoyl)-2-oleoyl-GPC (P-16:0/18:1)*	-1.1003	0.27297	0.92246	-1.1508	0.2508	0.67303	Lipid	Plasmalogen
1-(1-enyl-palmitoyl)-2-oleoyl-GPE (P-16:0/18:1)*	-0.58962	0.55634	0.96316	-1.5537	0.12141	0.59903	Lipid	Plasmalogen
1-(1-enyl-palmitoyl)-2-palmitoleoyl-GPC (P-16:0/16:1)*	0.37269	0.70991	0.9854	0.63329	0.52707	0.85369	Lipid	Plasmalogen
adrenate (22:4n6)	1.5622	0.12035	0.92246	1.1077	0.26896	0.68648	Lipid	Polyunsaturated Fatty Acid (n3 and n6)
arachidonate (20:4n6)	0.96348	0.33687	0.92246	0.40995	0.68216	0.89918	Lipid	Polyunsaturated Fatty Acid (n3 and n6)
dihomolinoleate (20:2n6)	0.65557	0.51311	0.95525	1.2486	0.21287	0.65536	Lipid	Polyunsaturated Fatty Acid (n3 and n6)
dihomolinolenate (20:3n3 or 3n6)	1.182	0.23908	0.92246	-0.21001	0.83381	0.94086	Lipid	Polyunsaturated Fatty Acid (n3 and n6)
docosadienoate (22:2n6)	0.19701	0.84409	0.99269	1.3259	0.18597	0.63842	Lipid	Polyunsaturated Fatty Acid (n3 and n6)
docosahexaenoate (DHA; 22:6n3)	1.7757	0.077823	0.92246	0.99447	0.32087	0.72251	Lipid	Polyunsaturated Fatty Acid (n3 and n6)
docosapentaenoate (DPA; 22:5n3)	0.72302	0.4708	0.94877	1.1668	0.24429	0.67303	Lipid	Polyunsaturated Fatty Acid (n3 and n6)
docosapentaenoate (n6 DPA; 22:5n6)	0.98026	0.32855	0.92246	0.70647	0.48049	0.82917	Lipid	Polyunsaturated Fatty Acid (n3 and n6)
docosatrienoate (22:3n3)	-0.21745	0.82816	0.99269	0.51449	0.60733	0.87798	Lipid	Polyunsaturated Fatty Acid (n3 and n6)
docosatrienoate (22:3n6)*	0.41859	0.67612	0.9854	3.1974	0.0015487	0.20451	Lipid	Polyunsaturated Fatty Acid (n3 and n6)
eicosapentaenoate (EPA; 20:5n3)	1.0704	0.28617	0.92246	1.1838	0.23752	0.6706	Lipid	Polyunsaturated Fatty Acid (n3 and n6)
hexadecadienoate (16:2n6)	1.0868	0.27887	0.92246	1.0672	0.2868	0.70229	Lipid	Polyunsaturated Fatty Acid (n3 and n6)
linoleate (18:2n6)	0.14255	0.88683	0.99269	0.69137	0.48992	0.8343	Lipid	Polyunsaturated Fatty Acid (n3 and n6)
linolenate (18:3n3 or 3n6)	0.25141	0.80184	0.99269	0.81765	0.41427	0.79548	Lipid	Polyunsaturated Fatty Acid (n3 and n6)
stearidonate (18:4n3)	0.8436	0.40025	0.93466	1.3911	0.16532	0.62526	Lipid	Polyunsaturated Fatty Acid (n3 and n6)
21-hydroxypregnanolone disulfate	-0.75372	0.4522	0.94314	0.77269	0.44037	0.8045	Lipid	Pregnenolone Steroids
21-hydroxypregnenolone disulfate	1.3061	0.19352	0.92246	1.1398	0.25534	0.67836	Lipid	Pregnenolone Steroids
17alpha-hydroxypregnenolone 3-sulfate	-0.31342	0.7544	0.99269	-0.17527	0.861	0.95612	Lipid	Pregnenolone Steroids
pregnen-diol disulfate*	-0.4851	0.62832	0.97321	0.23172	0.81693	0.94048	Lipid	Pregnenolone Steroids
pregnenediol sulfate (C21H34O5S)*	0.32222	0.74774	0.99269	-0.77267	0.44038	0.8045	Lipid	Pregnenolone Steroids
pregnenolone sulfate	0.3821	0.70293	0.9854	0.23649	0.81323	0.94048	Lipid	Pregnenolone Steroids
chenodeoxycholate	-0.84072	0.40185	0.93466	0.31622	0.75208	0.91659	Lipid	Primary Bile Acid Metabolism
cholate	-0.53904	0.59066	0.9671	-0.3179	0.7508	0.91659	Lipid	Primary Bile Acid Metabolism
glyco-alpha-muricholate	-0.39644	0.69235	0.9854	0.95021	0.34284	0.73734	Lipid	Primary Bile Acid Metabolism
glyco-beta-muricholate	-0.97747	0.32992	0.92246	0.080624	0.9358	0.97923	Lipid	Primary Bile Acid Metabolism
glycochenodeoxycholate	0.13137	0.89566	0.99269	1.1529	0.24994	0.67303	Lipid	Primary Bile Acid Metabolism
glycochenodeoxycholate glucuronide (1)	0.14644	0.88378	0.99269	-0.51238	0.6088	0.87798	Lipid	Primary Bile Acid Metabolism
glycochenodeoxycholate sulfate	1.1921	0.23512	0.92246	1.5055	0.13334	0.59937	Lipid	Primary Bile Acid Metabolism
glycocholate	0.30719	0.75913	0.99269	1.805	0.072162	0.53286	Lipid	Primary Bile Acid Metabolism
glycocholate glucuronide (1)	1.7051	0.090257	0.92246	-0.099049	0.92117	0.97797	Lipid	Primary Bile Acid Metabolism
glycocholate sulfate	1.359	0.1762	0.92246	3.0763	0.0023073	0.20451	Lipid	Primary Bile Acid Metabolism
tauro-beta-muricholate	-1.058	0.29175	0.92246	0.25438	0.79939	0.94048	Lipid	Primary Bile Acid Metabolism
taurochenodeoxycholate	-0.47408	0.63613	0.9748	1.6636	0.097329	0.55494	Lipid	Primary Bile Acid Metabolism
taurocholate	0.080771	0.93573	0.99556	2.4772	0.013844	0.42682	Lipid	Primary Bile Acid Metabolism
5alpha-pregnan-3beta,20alpha-diol disulfate	-0.72297	0.47083	0.94877	-0.52588	0.5994	0.87798	Lipid	Progestin Steroids
5alpha-pregnan-3beta,20alpha-diol monosulfate (2)	-1.0927	0.27631	0.92246	-1.6991	0.090429	0.5448	Lipid	Progestin Steroids
5alpha-pregnan-3beta,20beta-diol monosulfate (1)	-0.64289	0.52128	0.95525	-0.9349	0.35066	0.74106	Lipid	Progestin Steroids
5alpha-pregnan-diol disulfate	-0.12355	0.90184	0.99269	0.46151	0.6448	0.88498	Lipid	Progestin Steroids
pregnanolone/allopregnanolone sulfate	-0.8484	0.39758	0.93466	-0.79261	0.42869	0.79976	Lipid	Progestin Steroids
3b-hydroxy-5-cholenoic acid	0.86773	0.38694	0.93466	-1.0056	0.3155	0.71957	Lipid	Secondary Bile Acid Metabolism
7-ketodeoxycholate	-0.41094	0.68171	0.9854	-1.8206	0.069752	0.53286	Lipid	Secondary Bile Acid Metabolism
deoxycholate	0.13564	0.89229	0.99269	0.22146	0.8249	0.94068	Lipid	Secondary Bile Acid Metabolism
glycocholenate sulfate*	1.424	0.15654	0.92246	1.3121	0.19058	0.63859	Lipid	Secondary Bile Acid Metabolism
glycodeoxycholate	-1.1853	0.23778	0.92246	-0.68804	0.492	0.83442	Lipid	Secondary Bile Acid Metabolism
glycodeoxycholate sulfate	0.60083	0.54887	0.96316	1.1169	0.26499	0.6824	Lipid	Secondary Bile Acid Metabolism
glycohyocholate	0.10972	0.91278	0.99269	1.5458	0.12331	0.59903	Lipid	Secondary Bile Acid Metabolism
glycolithocholate	-0.81857	0.41434	0.93466	-0.88917	0.37469	0.76427	Lipid	Secondary Bile Acid Metabolism
glycolithocholate sulfate*	0.095042	0.92441	0.99269	1.2738	0.20381	0.64686	Lipid	Secondary Bile Acid Metabolism
glycoursodeoxycholate	-1.4276	0.15549	0.92246	0.10938	0.91298	0.97391	Lipid	Secondary Bile Acid Metabolism
hyocholate	-0.21531	0.82982	0.99269	-0.1578	0.87473	0.95934	Lipid	Secondary Bile Acid Metabolism
isoursodeoxycholate	-1.6116	0.10915	0.92246	-1.9735	0.049441	0.50127	Lipid	Secondary Bile Acid Metabolism
taurocholenate sulfate*	-0.28344	0.77723	0.99269	2.1081	0.035923	0.49979	Lipid	Secondary Bile Acid Metabolism
taurodeoxycholate	-1.0389	0.30055	0.92246	-1.3659	0.17309	0.62679	Lipid	Secondary Bile Acid Metabolism
taurolithocholate	-2.5847	0.010705	0.92246	-0.53525	0.59291	0.87671	Lipid	Secondary Bile Acid Metabolism
taurolithocholate 3-sulfate	-0.17793	0.85902	0.99269	1.1209	0.26331	0.6816	Lipid	Secondary Bile Acid Metabolism
tauroursodeoxycholate	-0.13914	0.88952	0.99269	0.54978	0.58292	0.8743	Lipid	Secondary Bile Acid Metabolism
ursodeoxycholate	-1.0315	0.30396	0.92246	-0.12293	0.90225	0.96873	Lipid	Secondary Bile Acid Metabolism
sphingadienine	-0.40618	0.6852	0.9854	-1.7131	0.087823	0.5423	Lipid	Sphingolipid Synthesis
sphinganine	-0.81883	0.41419	0.93466	-0.40837	0.68332	0.89918	Lipid	Sphingolipid Synthesis
sphinganine-1-phosphate	-0.57124	0.5687	0.96316	-1.1374	0.25634	0.67917	Lipid	Sphingolipid Synthesis
behenoyl sphingomyelin (d18:1/22:0)*	0.70889	0.4795	0.94877	-1.8708	0.062429	0.53286	Lipid	Sphingomyelins
lignoceroyl sphingomyelin (d18:1/24:0)	0.43367	0.66515	0.9854	-2.345	0.019739	0.42682	Lipid	Sphingomyelins
palmitoyl sphingomyelin (d18:1/16:0)	-0.32396	0.74642	0.99269	-2.2295	0.026589	0.45471	Lipid	Sphingomyelins
sphingomyelin (d17:1/14:0, d16:1/15:0)*	-0.37228	0.71022	0.9854	-1.9986	0.046631	0.50127	Lipid	Sphingomyelins
sphingomyelin (d17:1/16:0, d18:1/15:0, d16:1/17:0)*	0.17815	0.85885	0.99269	-2.089	0.037626	0.49979	Lipid	Sphingomyelins
sphingomyelin (d17:2/16:0, d18:2/15:0)*	-0.43202	0.66635	0.9854	-2.4285	0.015805	0.42682	Lipid	Sphingomyelins
sphingomyelin (d18:1/14:0, d16:1/16:0)*	-0.1348	0.89295	0.99269	-1.9406	0.053327	0.50974	Lipid	Sphingomyelins
sphingomyelin (d18:1/17:0, d17:1/18:0, d19:1/16:0)	0.33495	0.73813	0.99212	-1.516	0.13067	0.59937	Lipid	Sphingomyelins
sphingomyelin (d18:1/18:1, d18:2/18:0)	0.25081	0.80231	0.99269	-1.3046	0.19314	0.6405	Lipid	Sphingomyelins
sphingomyelin (d18:1/19:0, d19:1/18:0)*	-0.10575	0.91592	0.99269	-1.8005	0.072873	0.53286	Lipid	Sphingomyelins
sphingomyelin (d18:1/20:0, d16:1/22:0)*	0.08133	0.93529	0.99556	-1.7511	0.081041	0.5423	Lipid	Sphingomyelins
sphingomyelin (d18:1/20:1, d18:2/20:0)*	0.41637	0.67774	0.9854	-1.8066	0.071925	0.53286	Lipid	Sphingomyelins
sphingomyelin (d18:1/20:2, d18:2/20:1, d16:1/22:2)*	0.038156	0.96961	0.99874	-1.9989	0.046605	0.50127	Lipid	Sphingomyelins
sphingomyelin (d18:1/21:0, d17:1/22:0, d16:1/23:0)*	-0.62487	0.53301	0.96316	-2.4602	0.014501	0.42682	Lipid	Sphingomyelins
sphingomyelin (d18:1/22:1, d18:2/22:0, d16:1/24:1)*	-0.23324	0.8159	0.99269	-2.4065	0.016768	0.42682	Lipid	Sphingomyelins
sphingomyelin (d18:1/22:2, d18:2/22:1, d16:1/24:2)*	0.53424	0.59397	0.9671	-3.3068	0.0010694	0.20451	Lipid	Sphingomyelins
sphingomyelin (d18:1/24:1, d18:2/24:0)*	0.34867	0.72783	0.99212	-1.7535	0.080633	0.5423	Lipid	Sphingomyelins
sphingomyelin (d18:1/25:0, d19:0/24:1, d20:1/23:0, d19:1/24:0)*	-0.33859	0.73539	0.99212	-2.2278	0.026701	0.45471	Lipid	Sphingomyelins
sphingomyelin (d18:2/14:0, d18:1/14:1)*	-0.60167	0.54831	0.96316	-2.0857	0.037924	0.49979	Lipid	Sphingomyelins
sphingomyelin (d18:2/16:0, d18:1/16:1)*	1.3918	0.16605	0.92246	-1.5565	0.12074	0.59903	Lipid	Sphingomyelins
sphingomyelin (d18:2/18:1)*	0.99088	0.32335	0.92246	-1.962	0.050771	0.50127	Lipid	Sphingomyelins
sphingomyelin (d18:2/21:0, d16:2/23:0)*	0.29354	0.76952	0.99269	-2.2227	0.027049	0.45471	Lipid	Sphingomyelins
sphingomyelin (d18:2/23:0, d18:1/23:1, d17:1/24:1)*	-0.74949	0.45474	0.94439	-2.3969	0.017203	0.42682	Lipid	Sphingomyelins
sphingomyelin (d18:2/23:1)*	0.21186	0.83251	0.99269	-2.5612	0.010967	0.42682	Lipid	Sphingomyelins
sphingomyelin (d18:2/24:1, d18:1/24:2)*	0.154	0.87782	0.99269	-2.3061	0.021851	0.42682	Lipid	Sphingomyelins
sphingomyelin (d18:2/24:2)*	0.062629	0.95015	0.99874	-3.5677	0.00042477	0.20451	Lipid	Sphingomyelins
stearoyl sphingomyelin (d18:1/18:0)	0.64231	0.52166	0.95525	-1.2926	0.19724	0.6456	Lipid	Sphingomyelins
tricosanoyl sphingomyelin (d18:1/23:0)*	-0.53023	0.59674	0.9671	-3.0857	0.0022375	0.20451	Lipid	Sphingomyelins
hexadecasphingosine (d16:1)*	-0.9024	0.3683	0.93466	-0.76946	0.44228	0.8045	Lipid	Sphingosines
sphingosine	0.87652	0.38216	0.93466	-0.20771	0.83561	0.94086	Lipid	Sphingosines
sphingosine 1-phosphate	0.10718	0.91479	0.99269	-1.7691	0.077989	0.5423	Lipid	Sphingosines
3beta,7alpha-dihydroxy-5-cholestenoate	0.097222	0.92268	0.99269	-0.37336	0.70917	0.90584	Lipid	Sterol
3beta-hydroxy-5-cholestenoate	1.7399	0.083943	0.92246	0.036746	0.97071	0.9861	Lipid	Sterol
4-cholesten-3-one	-0.10531	0.91627	0.99269	-0.73599	0.46237	0.81615	Lipid	Sterol
7-HOCA	0.96979	0.33372	0.92246	0.24373	0.80762	0.94048	Lipid	Sterol
beta-sitosterol	1.6889	0.093322	0.92246	0.25576	0.79833	0.94048	Lipid	Sterol
campesterol	0.13773	0.89064	0.99269	-0.35942	0.71956	0.90584	Lipid	Sterol
cholesterol	-0.8138	0.41706	0.93466	-0.98561	0.32519	0.72695	Lipid	Sterol
7-methylguanine	1.5725	0.11797	0.92246	1.9214	0.055718	0.52235	Nucleotide	Purine Metabolism
adenosine	1.3959	0.16482	0.92246	0.80777	0.41992	0.79548	Nucleotide	Purine Metabolism
1-methyladenosine	1.3795	0.1698	0.92246	1.3533	0.17709	0.63209	Nucleotide	Purine Metabolism
hypoxanthine	0.025159	0.97996	0.99874	-0.94648	0.34473	0.73872	Nucleotide	Purine Metabolism
inosine 5'-monophosphate (IMP)	-1.0228	0.30807	0.92246	-1.0471	0.29598	0.70903	Nucleotide	Purine Metabolism
N6-carbamoylthreonyladenosine	1.7264	0.086354	0.92246	1.74	0.082982	0.5423	Nucleotide	Purine Metabolism
N6-succinyladenosine	3.9356	0.00012693	0.12363	2.1453	0.032803	0.49768	Nucleotide	Purine Metabolism
allantoin	1.5072	0.13388	0.92246	-0.34098	0.73338	0.90904	Nucleotide	Purine Metabolism
inosine	0.58844	0.55713	0.96316	-1.0699	0.28559	0.70229	Nucleotide	Purine Metabolism
N1-methylinosine	1.3611	0.17553	0.92246	1.3181	0.18858	0.63842	Nucleotide	Purine Metabolism
urate	0.88829	0.37582	0.93466	-0.48914	0.62513	0.88118	Nucleotide	Purine Metabolism
xanthine	-0.35502	0.72307	0.99194	0.22854	0.8194	0.94048	Nucleotide	Purine Metabolism
xanthosine	1.1122	0.26785	0.92246	0.37863	0.70525	0.90584	Nucleotide	Purine Metabolism
adenine	1.058	0.29175	0.92246	1.102	0.27141	0.68912	Nucleotide	Purine Metabolism
ADP	-0.45719	0.6482	0.97787	-1.3928	0.1648	0.62526	Nucleotide	Purine Metabolism
AMP	0.17386	0.86221	0.99269	-1.276	0.20304	0.64686	Nucleotide	Purine Metabolism
N6-methyladenosine	0.39752	0.69155	0.9854	-0.70437	0.4818	0.82991	Nucleotide	Purine Metabolism
guanosine	2.0361	0.043508	0.92246	-0.58329	0.56018	0.86373	Nucleotide	Purine Metabolism
N2,N2-dimethylguanosine	1.5764	0.11706	0.92246	1.7574	0.079965	0.5423	Nucleotide	Purine Metabolism
5,6-dihydrouridine	1.0206	0.30912	0.92246	1.5005	0.13463	0.59937	Nucleotide	Pyrimidine Metabolism
cytidine	1.5215	0.13024	0.92246	0.35052	0.72622	0.90777	Nucleotide	Pyrimidine Metabolism
N-acetyl-beta-alanine	0.17006	0.8652	0.99269	1.7909	0.074417	0.53745	Nucleotide	Pyrimidine Metabolism
pseudouridine	1.5683	0.11894	0.92246	1.205	0.22923	0.66716	Nucleotide	Pyrimidine Metabolism
uridine	-0.18139	0.85631	0.99269	-1.504	0.13373	0.59937	Nucleotide	Pyrimidine Metabolism
2'-O-methylcytidine	1.0025	0.31771	0.92246	0.16225	0.87123	0.95934	Nucleotide	Pyrimidine Metabolism
3-methylcytidine	0.56611	0.57217	0.96456	-0.75442	0.45124	0.80811	Nucleotide	Pyrimidine Metabolism
CMP	-0.33845	0.7355	0.99212	0.37029	0.71145	0.90584	Nucleotide	Pyrimidine Metabolism
dihydroorotate	-1.3885	0.16704	0.92246	0.50733	0.61233	0.87798	Nucleotide	Pyrimidine Metabolism
orotate	-0.29237	0.77041	0.99269	0.26888	0.78823	0.93608	Nucleotide	Pyrimidine Metabolism
orotidine	-0.13666	0.89149	0.99269	-0.068472	0.94546	0.98357	Nucleotide	Pyrimidine Metabolism
3-aminoisobutyrate	0.037546	0.9701	0.99874	1.156	0.2487	0.67303	Nucleotide	Pyrimidine Metabolism
5,6-dihydrothymine	0.32157	0.74823	0.99269	0.23708	0.81277	0.94048	Nucleotide	Pyrimidine Metabolism
2'-deoxyuridine	0.5135	0.60836	0.96929	-0.78011	0.436	0.8045	Nucleotide	Pyrimidine Metabolism
2'-O-methyluridine	1.3564	0.17701	0.92246	0.42179	0.6735	0.89586	Nucleotide	Pyrimidine Metabolism
3-ureidopropionate	-0.056298	0.95518	0.99874	1.7416	0.0827	0.5423	Nucleotide	Pyrimidine Metabolism
5,6-dihydrouracil	0.11649	0.90742	0.99269	-0.61132	0.54149	0.85578	Nucleotide	Pyrimidine Metabolism
5-methyluridine (ribothymidine)	-0.0063742	0.99492	0.99874	-0.13683	0.89126	0.96712	Nucleotide	Pyrimidine Metabolism
beta-alanine	1.7094	0.089454	0.92246	-0.28154	0.77851	0.93467	Nucleotide	Pyrimidine Metabolism
uracil	1.1324	0.2593	0.92246	0.61996	0.5358	0.85578	Nucleotide	Pyrimidine Metabolism
glucuronide of C10H18O2 (1)*	0.57659	0.56509	0.96316	0.80317	0.42257	0.79827	Partially Characterized Molecules	Partially Characterized Molecules
glucuronide of C10H18O2 (7)*	2.7611	0.0064846	0.92246	1.6583	0.098401	0.5578	Partially Characterized Molecules	Partially Characterized Molecules
glucuronide of C10H18O2 (8)*	0.98442	0.3265	0.92246	1.9298	0.054658	0.5174	Partially Characterized Molecules	Partially Characterized Molecules
glucuronide of C14H22O4 (2)*	1.2576	0.21051	0.92246	0.59773	0.55051	0.86077	Partially Characterized Molecules	Partially Characterized Molecules
glucuronide of C19H28O4 (1)*	-0.61154	0.54177	0.96316	0.40802	0.68358	0.89918	Partially Characterized Molecules	Partially Characterized Molecules
glucuronide of C8H14O2 (3)*	-0.37891	0.70529	0.9854	-0.84119	0.40097	0.7898	Partially Characterized Molecules	Partially Characterized Molecules
glucuronide of C8H16O2 (1)*	0.40303	0.68751	0.9854	-0.62825	0.53036	0.85472	Partially Characterized Molecules	Partially Characterized Molecules
glycine conjugate of C10H14O2 (1)*	1.4429	0.15114	0.92246	-0.24448	0.80704	0.94048	Partially Characterized Molecules	Partially Characterized Molecules
4-hydroxyphenylacetylglutamine	-0.30899	0.75776	0.99269	1.7598	0.079545	0.5423	Peptide	Acetylated Peptides
phenylacetylcarnitine	-1.2548	0.21151	0.92246	-0.91015	0.36354	0.7518	Peptide	Acetylated Peptides
phenylacetylglutamate	0.82084	0.41305	0.93466	1.7795	0.076259	0.5423	Peptide	Acetylated Peptides
phenylacetylglutamine	0.20025	0.84156	0.99269	1.1147	0.26594	0.6824	Peptide	Acetylated Peptides
phenylacetylhistidine	0.94118	0.34814	0.92605	0.77227	0.44062	0.8045	Peptide	Acetylated Peptides
phenylacetylmethionine	1.0121	0.31312	0.92246	0.26522	0.79104	0.93827	Peptide	Acetylated Peptides
glycylvaline	-0.23611	0.81367	0.99269	1.0688	0.28611	0.70229	Peptide	Dipeptide
histidylalanine	0.38813	0.69848	0.9854	-1.3481	0.17874	0.63294	Peptide	Dipeptide
isoleucylglycine	0.72383	0.47031	0.94877	-0.15656	0.8757	0.95934	Peptide	Dipeptide
prolylglycine	1.3554	0.17735	0.92246	-0.48725	0.62647	0.88118	Peptide	Dipeptide
valylglycine	-0.13223	0.89498	0.99269	-0.50283	0.61548	0.87798	Peptide	Dipeptide
ADpSGEGDFXAEGGGVR*	1.1041	0.27131	0.92246	-1.5995	0.11087	0.57805	Peptide	Fibrinogen Cleavage Peptide
ADSGEGDFXAEGGGVR*	1.0048	0.31664	0.92246	-2.0045	0.046001	0.50127	Peptide	Fibrinogen Cleavage Peptide
DSGEGDFXAEGGGVR*	1.0364	0.3017	0.92246	-2.0856	0.037933	0.49979	Peptide	Fibrinogen Cleavage Peptide
gamma-glutamyl-2-aminobutyrate	-2.2873	0.023588	0.92246	-0.43684	0.66257	0.89051	Peptide	Gamma-glutamyl Amino Acid
gamma-glutamyl-alpha-lysine	-0.80748	0.42068	0.93466	-0.1701	0.86506	0.95736	Peptide	Gamma-glutamyl Amino Acid
gamma-glutamylcitrulline*	-1.1162	0.26615	0.92246	-0.94209	0.34697	0.74057	Peptide	Gamma-glutamyl Amino Acid
gamma-glutamyl-epsilon-lysine	0.59894	0.55012	0.96316	0.049787	0.96033	0.98357	Peptide	Gamma-glutamyl Amino Acid
gamma-glutamylglutamate	-0.45668	0.64856	0.97787	0.82681	0.40906	0.79401	Peptide	Gamma-glutamyl Amino Acid
gamma-glutamylglutamine	-0.84898	0.39725	0.93466	-0.34275	0.73205	0.90904	Peptide	Gamma-glutamyl Amino Acid
gamma-glutamylglycine	0.58629	0.55857	0.96316	0.67287	0.50159	0.83707	Peptide	Gamma-glutamyl Amino Acid
gamma-glutamylhistidine	1.5704	0.11845	0.92246	1.1831	0.2378	0.6706	Peptide	Gamma-glutamyl Amino Acid
gamma-glutamylisoleucine*	0.12929	0.89731	0.99269	-1.0175	0.30979	0.71957	Peptide	Gamma-glutamyl Amino Acid
gamma-glutamylleucine	-1.1663	0.24535	0.92246	-0.44105	0.65952	0.8894	Peptide	Gamma-glutamyl Amino Acid
gamma-glutamylmethionine	-1.5287	0.12846	0.92246	-1.5255	0.12829	0.59937	Peptide	Gamma-glutamyl Amino Acid
gamma-glutamylphenylalanine	1.1581	0.24868	0.92246	1.0603	0.28992	0.70229	Peptide	Gamma-glutamyl Amino Acid
gamma-glutamylthreonine	-0.0087723	0.99301	0.99874	-0.21808	0.82753	0.94086	Peptide	Gamma-glutamyl Amino Acid
gamma-glutamyltryptophan	0.64216	0.52176	0.95525	1.333	0.18364	0.63723	Peptide	Gamma-glutamyl Amino Acid
gamma-glutamyltyrosine	-0.22925	0.81899	0.99269	0.40376	0.6867	0.89918	Peptide	Gamma-glutamyl Amino Acid
gamma-glutamylvaline	-1.0591	0.29126	0.92246	0.56641	0.57158	0.86805	Peptide	Gamma-glutamyl Amino Acid
HWESASLLR	0.33334	0.73934	0.99212	-0.31222	0.75511	0.91797	Peptide	Polypeptide
HWESASXX*	-1.3536	0.17793	0.92246	-0.84844	0.39693	0.78501	Peptide	Polypeptide
1H-indole-7-acetic acid	-0.57426	0.56666	0.96316	-1.9718	0.049632	0.50127	Xenobiotics	Bacterial/Fungal
N-methylpipecolate	0.92236	0.35783	0.93439	0.47114	0.63791	0.88347	Xenobiotics	Bacterial/Fungal
tartronate (hydroxymalonate)	2.1343	0.034458	0.92246	-0.80841	0.41955	0.79548	Xenobiotics	Bacterial/Fungal
2-hydroxyhippurate (salicylurate)	0.0445	0.96457	0.99874	1.5137	0.13126	0.59937	Xenobiotics	Benzoate Metabolism
3-(3-hydroxyphenyl)propionate	-1.9497	0.053091	0.92246	0.97951	0.32819	0.72889	Xenobiotics	Benzoate Metabolism
3-(3-hydroxyphenyl)propionate sulfate	0.71113	0.47812	0.94877	1.321	0.1876	0.63842	Xenobiotics	Benzoate Metabolism
3-hydroxyhippurate	-0.36187	0.71797	0.98771	1.4423	0.15034	0.61535	Xenobiotics	Benzoate Metabolism
3-methoxycatechol sulfate (1)	-1.0581	0.29174	0.92246	0.50419	0.61453	0.87798	Xenobiotics	Benzoate Metabolism
3-methoxycatechol sulfate (2)	-0.048382	0.96148	0.99874	0.89069	0.37388	0.76421	Xenobiotics	Benzoate Metabolism
3-methyl catechol sulfate (1)	-0.72088	0.47211	0.94877	0.61737	0.5375	0.85578	Xenobiotics	Benzoate Metabolism
3-phenylpropionate (hydrocinnamate)	0.026706	0.97873	0.99874	0.43869	0.66123	0.89047	Xenobiotics	Benzoate Metabolism
4-acetylphenyl sulfate	-1.2003	0.23191	0.92246	0.24783	0.80445	0.94048	Xenobiotics	Benzoate Metabolism
4-ethylphenyl sulfate	-0.55293	0.58114	0.96633	0.22773	0.82002	0.94048	Xenobiotics	Benzoate Metabolism
4-hydroxyhippurate	1.1606	0.24765	0.92246	1.8607	0.063848	0.53286	Xenobiotics	Benzoate Metabolism
4-methylcatechol sulfate	-0.32136	0.74839	0.99269	-0.25004	0.80274	0.94048	Xenobiotics	Benzoate Metabolism
4-methylguaiacol sulfate	1.0448	0.29782	0.92246	0.37131	0.71069	0.90584	Xenobiotics	Benzoate Metabolism
4-vinylphenol sulfate	-0.17035	0.86497	0.99269	0.43613	0.66308	0.89051	Xenobiotics	Benzoate Metabolism
benzoate	0.4135	0.67983	0.9854	0.36024	0.71895	0.90584	Xenobiotics	Benzoate Metabolism
catechol sulfate	-0.030994	0.97532	0.99874	-0.84871	0.39678	0.78501	Xenobiotics	Benzoate Metabolism
guaiacol sulfate	0.49091	0.62421	0.97321	-0.021471	0.98289	0.99307	Xenobiotics	Benzoate Metabolism
hippurate	1.1474	0.25305	0.92246	-0.042155	0.96641	0.98597	Xenobiotics	Benzoate Metabolism
methyl-4-hydroxybenzoate sulfate	1.4733	0.14277	0.92246	1.2286	0.22028	0.66022	Xenobiotics	Benzoate Metabolism
o-cresol sulfate	0.32806	0.74333	0.99269	1.2417	0.2154	0.6563	Xenobiotics	Benzoate Metabolism
p-cresol sulfate	-0.069042	0.94505	0.99874	-0.52579	0.59946	0.87798	Xenobiotics	Benzoate Metabolism
propyl 4-hydroxybenzoate sulfate	1.5562	0.12179	0.92246	0.13203	0.89506	0.96761	Xenobiotics	Benzoate Metabolism
2-aminophenol sulfate	1.0568	0.2923	0.92246	0.55121	0.58194	0.8743	Xenobiotics	Chemical
2-methoxyresorcinol sulfate	0.60523	0.54595	0.96316	1.2341	0.21822	0.66022	Xenobiotics	Chemical
3-acetylphenol sulfate	0.28992	0.77228	0.99269	0.99579	0.32023	0.72251	Xenobiotics	Chemical
1,2,3-benzenetriol sulfate (2)	-1.2059	0.22976	0.92246	-0.063559	0.94937	0.98357	Xenobiotics	Chemical
3-hydroxypyridine sulfate	-0.64838	0.51774	0.95525	0.22681	0.82074	0.94048	Xenobiotics	Chemical
4-hydroxychlorothalonil	0.011332	0.99097	0.99874	-0.55053	0.58241	0.8743	Xenobiotics	Chemical
6-hydroxyindole sulfate	-0.035708	0.97156	0.99874	0.43349	0.665	0.89185	Xenobiotics	Chemical
diethanolamine	-0.58522	0.55928	0.96316	-1.3987	0.16302	0.62526	Xenobiotics	Chemical
diglycerol	-0.49494	0.62137	0.97301	0.015045	0.98801	0.99503	Xenobiotics	Chemical
dimethyl sulfone	0.66337	0.50812	0.95262	-1.11	0.26797	0.68576	Xenobiotics	Chemical
ectoine	0.50066	0.61735	0.96984	-0.30202	0.76287	0.92054	Xenobiotics	Chemical
EDTA	-0.77649	0.43869	0.93466	-0.045172	0.964	0.9855	Xenobiotics	Chemical
ethyl glucuronide	0.56578	0.5724	0.96456	-1.1518	0.2504	0.67303	Xenobiotics	Chemical
iminodiacetate (IDA)	-1.1933	0.23463	0.92246	0.20698	0.83618	0.94086	Xenobiotics	Chemical
indoleacetylcarnitine*	0.58149	0.56179	0.96316	-1.2447	0.21432	0.65536	Xenobiotics	Chemical
O-sulfo-L-tyrosine	1.7352	0.084773	0.92246	0.92852	0.35395	0.74215	Xenobiotics	Chemical
perfluorooctanesulfonate (PFOS)	0.012384	0.99014	0.99874	-0.39803	0.69092	0.90049	Xenobiotics	Chemical
perfluorooctanoate (PFOA)*	0.10512	0.91642	0.99269	0.0222	0.9823	0.99307	Xenobiotics	Chemical
succinimide	0.68323	0.49552	0.95262	2.5915	0.010065	0.42682	Xenobiotics	Chemical
sulfate*	-0.11135	0.91149	0.99269	0.056168	0.95525	0.98357	Xenobiotics	Chemical
thioproline	0.95753	0.33985	0.92246	-1.1035	0.27075	0.68912	Xenobiotics	Chemical
trizma acetate	1.7101	0.089329	0.92246	1.4384	0.15147	0.61535	Xenobiotics	Chemical
2-hydroxyacetaminophen sulfate*	-0.98189	0.32775	0.92246	0.40717	0.6842	0.89918	Xenobiotics	Drug - Analgesics, Anesthetics
2-hydroxyibuprofen	1.4993	0.13592	0.92246	0.54311	0.58749	0.8743	Xenobiotics	Drug - Analgesics, Anesthetics
2-methoxyacetaminophen glucuronide*	-0.7554	0.4512	0.94306	0.50242	0.61577	0.87798	Xenobiotics	Drug - Analgesics, Anesthetics
2-methoxyacetaminophen sulfate*	0.75783	0.44975	0.94306	-0.31661	0.75178	0.91659	Xenobiotics	Drug - Analgesics, Anesthetics
3-(cystein-S-yl)acetaminophen*	0.66245	0.50871	0.95262	0.58419	0.55957	0.86373	Xenobiotics	Drug - Analgesics, Anesthetics
3-(N-acetyl-L-cystein-S-yl) acetaminophen	0.93826	0.34963	0.92605	0.0076421	0.99391	0.99559	Xenobiotics	Drug - Analgesics, Anesthetics
4-acetamidophenol	-0.27933	0.78038	0.99269	1.6036	0.10996	0.5764	Xenobiotics	Drug - Analgesics, Anesthetics
4-acetamidophenylglucuronide	-0.15494	0.87708	0.99269	-0.22773	0.82002	0.94048	Xenobiotics	Drug - Analgesics, Anesthetics
4-acetaminophen sulfate	-0.99462	0.32153	0.92246	0.13719	0.89098	0.96712	Xenobiotics	Drug - Analgesics, Anesthetics
4-aminophenol sulfate (2)	1.7203	0.087449	0.92246	0.72294	0.47033	0.81888	Xenobiotics	Drug - Analgesics, Anesthetics
carboxyibuprofen	1.2003	0.23192	0.92246	0.87825	0.38057	0.76983	Xenobiotics	Drug - Analgesics, Anesthetics
desmethylnaproxen sulfate	-0.46303	0.64402	0.97787	0.055654	0.95566	0.98357	Xenobiotics	Drug - Analgesics, Anesthetics
diclofenac	-0.65958	0.51054	0.95262	1.0786	0.28172	0.70229	Xenobiotics	Drug - Analgesics, Anesthetics
ibuprofen	1.3316	0.18503	0.92246	-0.41979	0.67497	0.89659	Xenobiotics	Drug - Analgesics, Anesthetics
ibuprofen acyl glucuronide	0.79985	0.42507	0.93466	1.7005	0.090172	0.5448	Xenobiotics	Drug - Analgesics, Anesthetics
lidocaine	1.4247	0.15632	0.92246	-0.59703	0.55098	0.86077	Xenobiotics	Drug - Analgesics, Anesthetics
morphine	0.10736	0.91465	0.99269	-2.0335	0.042965	0.50127	Xenobiotics	Drug - Analgesics, Anesthetics
morphine-3-glucuronide	0.2049	0.83793	0.99269	-1.0042	0.31616	0.71957	Xenobiotics	Drug - Analgesics, Anesthetics
morphine-6-glucuronide	0.91701	0.36062	0.93466	-1.3815	0.16823	0.62526	Xenobiotics	Drug - Analgesics, Anesthetics
naproxen	-0.79192	0.42967	0.93466	-0.95336	0.34125	0.73734	Xenobiotics	Drug - Analgesics, Anesthetics
N-desmethyl tramadol	-1.4346	0.1535	0.92246	0.21096	0.83307	0.94086	Xenobiotics	Drug - Analgesics, Anesthetics
N-ethylglycinexylidide	1.4602	0.14634	0.92246	0.10675	0.91506	0.97507	Xenobiotics	Drug - Analgesics, Anesthetics
O-desmethyltramadol	0.18706	0.85187	0.99269	0.19315	0.84698	0.94595	Xenobiotics	Drug - Analgesics, Anesthetics
O-desmethyltramadol glucuronide	-0.87606	0.3824	0.93466	-0.08718	0.93059	0.97923	Xenobiotics	Drug - Analgesics, Anesthetics
salicyluric glucuronide*	0.79369	0.42864	0.93466	1.6867	0.092792	0.5467	Xenobiotics	Drug - Analgesics, Anesthetics
tramadol	0.34078	0.73375	0.99212	0.42401	0.67189	0.89493	Xenobiotics	Drug - Analgesics, Anesthetics
amoxicillin	0.17668	0.86	0.99269	-0.76392	0.44557	0.8045	Xenobiotics	Drug - Antibiotic
cefazolin	-1.0744	0.28436	0.92246	1.2816	0.20108	0.64595	Xenobiotics	Drug - Antibiotic
ceftazidime	0.79985	0.42507	0.93466	1.0402	0.29916	0.71142	Xenobiotics	Drug - Antibiotic
ciprofloxacin	1.1566	0.24927	0.92246	0.035876	0.97141	0.9861	Xenobiotics	Drug - Antibiotic
clindamycin	-1.4157	0.15896	0.92246	1.3802	0.16866	0.62526	Xenobiotics	Drug - Antibiotic
doxycycline	-0.98606	0.3257	0.92246	0.24547	0.80627	0.94048	Xenobiotics	Drug - Antibiotic
fluconazole	0.47403	0.63618	0.9748	1.5401	0.12468	0.59915	Xenobiotics	Drug - Antibiotic
linezolid	1.203	0.23089	0.92246	0.085948	0.93157	0.97923	Xenobiotics	Drug - Antibiotic
meropenem	-0.54246	0.58831	0.9671	0.40252	0.68761	0.89918	Xenobiotics	Drug - Antibiotic
metronidazole	1.1647	0.246	0.92246	0.24918	0.80341	0.94048	Xenobiotics	Drug - Antibiotic
moxifloxacin	-0.64445	0.52027	0.95525	0.65857	0.51072	0.84171	Xenobiotics	Drug - Antibiotic
ofloxacin	-0.37603	0.70743	0.9854	-0.61526	0.53889	0.85578	Xenobiotics	Drug - Antibiotic
mycophenolic acid	1.4293	0.15502	0.92246	1.3766	0.16976	0.62679	Xenobiotics	Drug - Antiinflammatory, Immunosuppressant
mycophenolic acid glucuronide	1.5642	0.1199	0.92246	1.4816	0.13958	0.60121	Xenobiotics	Drug - Antiinflammatory, Immunosuppressant
prednisolone	-0.9288	0.3545	0.93067	-0.79606	0.42668	0.79976	Xenobiotics	Drug - Antiinflammatory, Immunosuppressant
alpha-hydroxymetoprolol	-0.84642	0.39868	0.93466	-0.46871	0.63965	0.88462	Xenobiotics	Drug - Cardiovascular
candesartan	1.1051	0.2709	0.92246	-0.19005	0.84941	0.94648	Xenobiotics	Drug - Cardiovascular
furosemide	0.82092	0.413	0.93466	0.40075	0.68891	0.89918	Xenobiotics	Drug - Cardiovascular
hydrochlorothiazide	-1.8903	0.060654	0.92246	-0.94923	0.34333	0.73734	Xenobiotics	Drug - Cardiovascular
metoprolol	-1.5665	0.11934	0.92246	0.8337	0.40517	0.79333	Xenobiotics	Drug - Cardiovascular
metoprolol acid metabolite*	-0.24048	0.81029	0.99269	0.33423	0.73846	0.90909	Xenobiotics	Drug - Cardiovascular
milrinone*	0.22448	0.82269	0.99269	1.0402	0.29916	0.71142	Xenobiotics	Drug - Cardiovascular
valsartan	0.79622	0.42717	0.93466	-1.3195	0.18811	0.63842	Xenobiotics	Drug - Cardiovascular
verapamil	-0.41921	0.67567	0.9854	0.93585	0.35017	0.74106	Xenobiotics	Drug - Cardiovascular
famotidine	0.83347	0.40591	0.93466	0.36172	0.71784	0.90584	Xenobiotics	Drug - Gastrointestinal
metoclopramide	-0.71816	0.47378	0.94877	1.148	0.25195	0.67303	Xenobiotics	Drug - Gastrointestinal
omeprazole	1.1359	0.25781	0.92246	-1.832	0.068035	0.53286	Xenobiotics	Drug - Gastrointestinal
ondansetron	-0.3827	0.70248	0.9854	-0.46577	0.64175	0.88498	Xenobiotics	Drug - Gastrointestinal
pantoprazole	-0.41971	0.6753	0.9854	0.36647	0.7143	0.90584	Xenobiotics	Drug - Gastrointestinal
ranitidine	0.15596	0.87628	0.99269	0.1052	0.91629	0.97531	Xenobiotics	Drug - Gastrointestinal
allopurinol	-1.2511	0.21287	0.92246	-0.92915	0.35362	0.74215	Xenobiotics	Drug - Metabolic
allopurinol riboside	-1.2978	0.19637	0.92246	0.014908	0.98812	0.99503	Xenobiotics	Drug - Metabolic
atorvastatin (lipitor)	-1.123	0.26324	0.92246	1.1519	0.25037	0.67303	Xenobiotics	Drug - Metabolic
atorvastatin lactone	-1.4257	0.15605	0.92246	1.1291	0.25982	0.68147	Xenobiotics	Drug - Metabolic
hydroxypioglitazone (M-IV)	1.1205	0.26429	0.92246	-1.3644	0.17357	0.62679	Xenobiotics	Drug - Metabolic
metformin	-1.0696	0.28654	0.92246	-0.76744	0.44348	0.8045	Xenobiotics	Drug - Metabolic
o-hydroxyatorvastatin	-0.89438	0.37256	0.93466	1.3515	0.17763	0.63209	Xenobiotics	Drug - Metabolic
o-hydroxyatorvastatin lactone	-0.95951	0.33886	0.92246	1.6353	0.10314	0.56179	Xenobiotics	Drug - Metabolic
oxypurinol	-0.33567	0.73759	0.99212	-0.23811	0.81197	0.94048	Xenobiotics	Drug - Metabolic
p-hydroxyatorvastatin	0.90277	0.3681	0.93466	1.1764	0.24045	0.67174	Xenobiotics	Drug - Metabolic
p-hydroxyatorvastatin lactone	0.29217	0.77056	0.99269	1.5883	0.11336	0.5848	Xenobiotics	Drug - Metabolic
2-propyl-2-pentenoate (2-ene-valproate)	0.52459	0.60065	0.96738	-0.54616	0.5854	0.8743	Xenobiotics	Drug - Neurological
2-propyl-4-pentenoate (4-ene-valproate)	0.39748	0.69158	0.9854	-1.1281	0.26028	0.68147	Xenobiotics	Drug - Neurological
3-hydroxyvalproate	0.96809	0.33457	0.92246	0.40437	0.68626	0.89918	Xenobiotics	Drug - Neurological
carbamazepine	-1.4257	0.15605	0.92246	-0.73235	0.46458	0.81615	Xenobiotics	Drug - Neurological
carbamazepine 10,11-epoxide*	-0.59514	0.55265	0.96316	0.47435	0.63563	0.88281	Xenobiotics	Drug - Neurological
carbamazepine glucuronide*	-1.2938	0.19775	0.92246	0.14043	0.88843	0.96712	Xenobiotics	Drug - Neurological
gabapentin	1.1112	0.26829	0.92246	-0.77623	0.43828	0.8045	Xenobiotics	Drug - Neurological
homoveratric acid	-0.31683	0.75182	0.99269	0.20295	0.83933	0.94086	Xenobiotics	Drug - Neurological
levetiracetam	0.91125	0.36364	0.93466	-1.6324	0.10374	0.56191	Xenobiotics	Drug - Neurological
rocuronium	1.2334	0.21937	0.92246	0.53466	0.59332	0.87671	Xenobiotics	Drug - Neurological
valproate (2-propylpentanoate)	0.39748	0.69158	0.9854	-0.82418	0.41055	0.79422	Xenobiotics	Drug - Neurological
1-hydroxy-2-naphthalenecarboxylate	0.4157	0.67823	0.9854	-1.2723	0.20434	0.64686	Xenobiotics	Drug - Other
fosfomycin	1.2507	0.21302	0.92246	-1.3813	0.16832	0.62526	Xenobiotics	Drug - Other
S-carboxymethyl-L-cysteine	0.85214	0.3955	0.93466	0.097697	0.92224	0.97797	Xenobiotics	Drug - Other
escitalopram	-2.2271	0.027437	0.92246	-0.22527	0.82194	0.94048	Xenobiotics	Drug - Psychoactive
paroxetine	-1.1156	0.26641	0.92246	0.73348	0.46389	0.81615	Xenobiotics	Drug - Psychoactive
quetiapine	0.37409	0.70887	0.9854	-1.7299	0.084766	0.5423	Xenobiotics	Drug - Psychoactive
trazadone	-1.2084	0.22881	0.92246	0.61785	0.53719	0.85578	Xenobiotics	Drug - Psychoactive
cetirizine	-0.58245	0.56115	0.96316	-0.90721	0.36509	0.75257	Xenobiotics	Drug - Respiratory
pseudoephedrine	1.3608	0.17565	0.92246	-0.72368	0.46988	0.81888	Xenobiotics	Drug - Respiratory
hydroquinone sulfate	-0.40596	0.68535	0.9854	1.8141	0.070754	0.53286	Xenobiotics	Drug - Topical Agents
salicylate	-0.020625	0.98357	0.99874	0.96278	0.33651	0.73734	Xenobiotics	Drug - Topical Agents
2,3-dihydroxyisovalerate	2.1552	0.03275	0.92246	0.79992	0.42445	0.79892	Xenobiotics	Food Component/Plant
2,8-quinolinediol sulfate	0.42713	0.6699	0.9854	-1.1701	0.24297	0.67303	Xenobiotics	Food Component/Plant
2-keto-3-deoxy-gluconate	0.71321	0.47683	0.94877	1.6291	0.10443	0.56252	Xenobiotics	Food Component/Plant
3-hydroxystachydrine*	0.24637	0.80573	0.99269	-0.58636	0.55812	0.86373	Xenobiotics	Food Component/Plant
4-allylphenol sulfate	1.4709	0.14342	0.92246	-0.83501	0.40444	0.79333	Xenobiotics	Food Component/Plant
4-ethylphenol glucuronide	-0.38041	0.70419	0.9854	0.53153	0.59548	0.87703	Xenobiotics	Food Component/Plant
4-vinylguaiacol sulfate	-1.1503	0.25188	0.92246	0.8842	0.37736	0.76651	Xenobiotics	Food Component/Plant
acesulfame	0.8528	0.39514	0.93466	0.64634	0.5186	0.84695	Xenobiotics	Food Component/Plant
alliin	-0.78837	0.43173	0.93466	-0.61245	0.54075	0.85578	Xenobiotics	Food Component/Plant
beta-guanidinopropanoate	0.88553	0.3773	0.93466	-0.45541	0.64917	0.88498	Xenobiotics	Food Component/Plant
cinnamoylglycine	1.6335	0.10448	0.92246	0.36931	0.71218	0.90584	Xenobiotics	Food Component/Plant
daidzein sulfate (2)	0.29259	0.77024	0.99269	0.70002	0.4845	0.83021	Xenobiotics	Food Component/Plant
dihydroferulic acid	-0.31904	0.75014	0.99269	0.71163	0.47729	0.82517	Xenobiotics	Food Component/Plant
ergothioneine	1.0345	0.30256	0.92246	-1.187	0.23626	0.6706	Xenobiotics	Food Component/Plant
erythritol	2.0545	0.041674	0.92246	1.4102	0.15962	0.62526	Xenobiotics	Food Component/Plant
1-kestose	1.2095	0.22838	0.92246	-0.54202	0.58825	0.8743	Xenobiotics	Food Component/Plant
eugenol sulfate	0.35698	0.72161	0.99133	-0.055573	0.95572	0.98357	Xenobiotics	Food Component/Plant
ferulic acid 4-sulfate	-0.3348	0.73825	0.99212	-0.040306	0.96788	0.98608	Xenobiotics	Food Component/Plant
genistein sulfate*	0.093175	0.92589	0.99269	0.6099	0.54243	0.85578	Xenobiotics	Food Component/Plant
glucuronide of piperine metabolite C17H21NO3 (3)*	-1.2225	0.22344	0.92246	-1.3984	0.16311	0.62526	Xenobiotics	Food Component/Plant
glucuronide of piperine metabolite C17H21NO3 (4)*	-1.1106	0.26851	0.92246	-0.82879	0.40794	0.79401	Xenobiotics	Food Component/Plant
glucuronide of piperine metabolite C17H21NO3 (5)*	-1.3486	0.17951	0.92246	-1.1792	0.23935	0.6706	Xenobiotics	Food Component/Plant
homostachydrine*	-1.6272	0.10581	0.92246	0.051098	0.95928	0.98357	Xenobiotics	Food Component/Plant
indolin-2-one	1.5087	0.13348	0.92246	0.93842	0.34885	0.74102	Xenobiotics	Food Component/Plant
methyl glucopyranoside (alpha + beta)	-0.22717	0.8206	0.99269	-0.80774	0.41994	0.79548	Xenobiotics	Food Component/Plant
methyl indole-3-acetate	2.54	0.012108	0.92246	-0.85716	0.3921	0.7818	Xenobiotics	Food Component/Plant
N-(2-furoyl)glycine	-0.89326	0.37316	0.93466	0.57434	0.56621	0.86551	Xenobiotics	Food Component/Plant
N-acetylalliin	-0.21254	0.83198	0.99269	1.2369	0.2172	0.65971	Xenobiotics	Food Component/Plant
naringenin 7-glucuronide	1.4009	0.16333	0.92246	0.76505	0.4449	0.8045	Xenobiotics	Food Component/Plant
phytanate	0.94944	0.34394	0.92513	0.11277	0.9103	0.97355	Xenobiotics	Food Component/Plant
piperine	0.046296	0.96314	0.99874	-0.37571	0.70742	0.90584	Xenobiotics	Food Component/Plant
pyrraline	-0.72097	0.47206	0.94877	-0.895	0.37157	0.76109	Xenobiotics	Food Component/Plant
quinate	0.14912	0.88166	0.99269	-0.49055	0.62414	0.88118	Xenobiotics	Food Component/Plant
saccharin	0.95623	0.34051	0.92246	1.261	0.20837	0.65463	Xenobiotics	Food Component/Plant
S-allylcysteine	0.1397	0.88909	0.99269	-0.71396	0.47586	0.82517	Xenobiotics	Food Component/Plant
stachydrine	0.81886	0.41418	0.93466	-0.51889	0.60425	0.87798	Xenobiotics	Food Component/Plant
sulfate of piperine metabolite C16H19NO3 (2)*	-0.11811	0.90614	0.99269	-0.5042	0.61453	0.87798	Xenobiotics	Food Component/Plant
sulfate of piperine metabolite C16H19NO3 (3)*	-0.5566	0.57863	0.96633	-0.27103	0.78657	0.93525	Xenobiotics	Food Component/Plant
sulfate of piperine metabolite C18H21NO3 (1)*	-0.55427	0.58022	0.96633	-0.57149	0.56813	0.86551	Xenobiotics	Food Component/Plant
tartarate	1.6992	0.091367	0.92246	-0.77927	0.43649	0.8045	Xenobiotics	Food Component/Plant
thymol sulfate	0.36242	0.71755	0.98771	0.52637	0.59905	0.87798	Xenobiotics	Food Component/Plant
umbelliferone sulfate	-0.080083	0.93628	0.99556	0.32081	0.7486	0.91659	Xenobiotics	Food Component/Plant
3-hydroxycotinine glucuronide	-0.18319	0.8549	0.99269	0.53908	0.59027	0.87597	Xenobiotics	Tobacco Metabolite
cotinine	0.30618	0.7599	0.99269	0.1332	0.89413	0.96761	Xenobiotics	Tobacco Metabolite
cotinine N-oxide	0.40363	0.68706	0.9854	0.42507	0.67112	0.89493	Xenobiotics	Tobacco Metabolite
hydroxycotinine	0.15177	0.87957	0.99269	0.36502	0.71538	0.90584	Xenobiotics	Tobacco Metabolite
norcotinine	0.1397	0.88909	0.99269	-0.66378	0.50739	0.83848	Xenobiotics	Tobacco Metabolite
3,7-dimethylurate	1.7571	0.080954	0.92246	1.2903	0.19803	0.6456	Xenobiotics	Xanthine Metabolism
3-methylxanthine	0.57232	0.56797	0.96316	0.7366	0.46199	0.81615	Xenobiotics	Xanthine Metabolism
1,3,7-trimethylurate	0.21918	0.82681	0.99269	0.66984	0.50352	0.83707	Xenobiotics	Xanthine Metabolism
1,3-dimethylurate	0.82912	0.40836	0.93466	-1.1645	0.24521	0.67303	Xenobiotics	Xanthine Metabolism
5-acetylamino-6-amino-3-methyluracil	0.54158	0.58892	0.9671	0.83167	0.40632	0.79391	Xenobiotics	Xanthine Metabolism
5-acetylamino-6-formylamino-3-methyluracil	0.56992	0.56959	0.96316	0.69074	0.49031	0.8343	Xenobiotics	Xanthine Metabolism
1,7-dimethylurate	-0.023017	0.98167	0.99874	0.25788	0.79669	0.94048	Xenobiotics	Xanthine Metabolism
7-methylurate	0.40186	0.68836	0.9854	1.2679	0.2059	0.64968	Xenobiotics	Xanthine Metabolism
7-methylxanthine	0.64339	0.52096	0.95525	1.4869	0.13818	0.59965	Xenobiotics	Xanthine Metabolism
caffeic acid sulfate	-0.30116	0.76371	0.99269	-0.61035	0.54214	0.85578	Xenobiotics	Xanthine Metabolism
caffeine	-0.5171	0.60585	0.96738	0.18836	0.85073	0.94688	Xenobiotics	Xanthine Metabolism
1-methylurate	1.2699	0.20609	0.92246	0.80947	0.41895	0.79548	Xenobiotics	Xanthine Metabolism
1-methylxanthine	0.44875	0.65426	0.9819	-1.1847	0.23714	0.6706	Xenobiotics	Xanthine Metabolism
paraxanthine	-0.0037225	0.99703	0.99874	-0.51585	0.60637	0.87798	Xenobiotics	Xanthine Metabolism
theobromine	0.12412	0.90139	0.99269	1.096	0.27403	0.6939	Xenobiotics	Xanthine Metabolism
theophylline	0.027304	0.97825	0.99874	-1.891	0.059681	0.52899	Xenobiotics	Xanthine Metabolism
