# Supplementary material for: Sex-Specific Catabolic Metabolism Alterations in the Critically Ill following High Dose Vitamin D
Source: Metabolites. 2022 Feb 25;12(3):207. doi: 10.3390/metabo12030207 (PMC8953844; doi:10.3390/metabo12030207)
Supplement: Supplementary file 1 [file metabolites-12-00207-s001.zip › Table S4.xlsx]

## Sheet: Sex-Stratified
Metabolite	women Beta	women P-value	women q-value	Men Beta	Men P-value	Men q-value	Super Pathway	Sub Pathway
asparagine	0.00303648	0.00703059	0.0790335	0.00032855	0.739902	0.845602	Amino Acid	Alanine and Aspartate Metabolism
3-methyl-2-oxovalerate	0.00454382	0.000482356	0.0304599	0.00371841	0.00246875	0.0523943	Amino Acid	BCAA Metabolism
4-methyl-2-oxopentanoate	0.0035679	0.0101778	0.094799	0.00370063	0.00377828	0.0598254	Amino Acid	BCAA Metabolism
leucine	0.00293306	0.00495571	0.0724423	0.00371534	0.000241148	0.0134209	Amino Acid	BCAA Metabolism
isoleucine	0.00292637	0.00500855	0.0724423	0.00313269	0.000332172	0.01621	Amino Acid	BCAA Metabolism
isovalerylglycine	-0.00700429	0.00606171	0.075949	-0.00251168	0.250878	0.465508	Amino Acid	BCAA Metabolism
3-methyl catechol sulfate (1)	0.00631539	0.0116122	0.0980765	-0.00175604	0.464824	0.651519	Xenobiotics	Benzoate Metabolism
perfluorooctanoate (PFOA)*	0.00675032	0.00191261	0.0550268	0.00288037	0.126523	0.301324	Xenobiotics	Chemical
1,2,3-benzenetriol sulfate (2)	0.00669354	0.00619261	0.075949	0.00229905	0.277461	0.496884	Xenobiotics	Chemical
4-hydroxychlorothalonil	0.00492887	0.00996488	0.094618	-0.000414337	0.818008	0.891271	Xenobiotics	Chemical
guanidinoacetate	0.00536022	0.00331021	0.0628348	0.00226338	0.172024	0.369	Amino Acid	Creatine Metabolism
behenoyl dihydrosphingomyelin (d18:0/22:0)*	0.0052608	0.00172041	0.0550268	0.00351024	0.0332905	0.150424	Lipid	Dihydrosphingomyelins
sphingomyelin (d18:0/20:0, d16:0/22:0)*	0.00461947	0.00806177	0.0847786	0.00262769	0.102911	0.273225	Lipid	Dihydrosphingomyelins
hydrochlorothiazide	0.00571963	0.00650758	0.0766797	0.00124408	0.413147	0.606363	Xenobiotics	Drug - Cardiovascular
metformin	0.012002	0.00733406	0.0815081	0.00312891	0.0581703	0.202765	Xenobiotics	Drug - Metabolic
arachidonoyl ethanolamide	0.00440629	0.00136705	0.0550268	0.000763725	0.508933	0.677733	Lipid	Endocannabinoid
2-aminoheptanoate	0.00578493	0.00207	0.0550268	0.00433824	0.0070649	0.0728274	Lipid	Fatty Acid, Amino
DSGEGDFXAEGGGVR*	0.00431209	0.0107588	0.0960838	0.00228057	0.0534369	0.191042	Peptide	Fibrinogen Cleavage Peptide
umbelliferone sulfate	0.00628241	0.000153857	0.021496	0.00628241	0.000153857	0.0115511	Xenobiotics	Food Component/Plant
pyrraline	0.0059162	0.00400653	0.0687436	0.000313678	0.85305	0.913916	Xenobiotics	Food Component/Plant
gamma-glutamyl-2-aminobutyrate	0.0056122	0.00124443	0.0529153	0.00326483	0.0362972	0.154699	Peptide	Gamma-glutamyl Amino Acid
gamma-glutamylcitrulline*	0.00532122	0.00171382	0.0550268	0.00394574	0.0181116	0.109117	Peptide	Gamma-glutamyl Amino Acid
gamma-glutamylglutamine	0.00397936	0.00949971	0.0915743	0.00211501	0.147717	0.33143	Peptide	Gamma-glutamyl Amino Acid
2-aminobutyrate	0.00364151	0.00856416	0.0881658	0.0021776	0.0807193	0.238012	Amino Acid	Glutathione Metabolism
3-phosphoglycerate	0.00488879	0.0103027	0.0950568	0.00315933	0.0543003	0.193095	Carbohydrate	Glycolysis, Gluconeogenesis, and Pyruvate Metabolism
lactate	0.00364301	0.00334091	0.0628348	0.000240989	0.818216	0.891271	Carbohydrate	Glycolysis, Gluconeogenesis, and Pyruvate Metabolism
lactosyl-N-behenoyl-sphingosine (d18:1/22:0)*	0.0063895	2.86757e-05	0.00934829	0.00185999	0.20438	0.411288	Lipid	Lactosylceramides
lactosyl-N-nervonoyl-sphingosine (d18:1/24:1)*	0.00554441	7.86629e-05	0.0153865	0.00215684	0.115793	0.287568	Lipid	Lactosylceramides
lactosyl-N-palmitoyl-sphingosine (d18:1/16:0)	0.00379057	0.00042255	0.0304599	0.00276516	0.0258298	0.132684	Lipid	Lactosylceramides
palmitoylcarnitine (C16)	0.00459336	0.00264916	0.0583235	-0.00156312	0.276028	0.496138	Lipid	Long-chain Acylcarnitine
margaroylcarnitine (C17)*	0.0055907	0.00118655	0.0527476	-0.000697298	0.646714	0.781493	Lipid	Long-chain Acylcarnitine
stearoylcarnitine (C18)	0.00644676	1.0827e-05	0.00788613	5.81187e-05	0.967232	0.980574	Lipid	Long-chain Acylcarnitine
linoleoylcarnitine (C18:2)*	0.00412209	0.0111429	0.0980765	0.0010586	0.434984	0.628972	Lipid	Long-chain Acylcarnitine
dihomo-linolenoylcarnitine (C20:3n3 or 6)*	0.00571489	0.000763983	0.0415097	0.00110625	0.473333	0.654756	Lipid	Long-chain Acylcarnitine
arachidonoylcarnitine (C20:4)	0.00481316	0.00621066	0.075949	0.00103759	0.509667	0.677733	Lipid	Long-chain Acylcarnitine
arachidoylcarnitine (C20)*	0.00431279	0.0121319	0.0988748	0.00081078	0.57109	0.728607	Lipid	Long-chain Acylcarnitine
adrenoylcarnitine (C22:4)*	0.00494954	0.00578897	0.075949	0.00116087	0.497848	0.668363	Lipid	Long-chain Acylcarnitine
lignoceroylcarnitine (C24)*	0.00472549	0.00117316	0.0527476	-0.000171708	0.902013	0.942575	Lipid	Long-chain Acylcarnitine
cerotoylcarnitine (C26)*	0.00483112	0.00186216	0.0550268	0.000253513	0.868402	0.921081	Lipid	Long-chain Acylcarnitine
1-(1-enyl-stearoyl)-GPE (P-18:0)*	0.00462475	0.00671131	0.0781389	0.0052604	0.00018783	0.012941	Lipid	Lysoplasmalogen
1-(1-enyl-palmitoyl)-GPC (P-16:0)*	0.00542513	0.00252191	0.0576411	0.00602627	0.000198889	0.012941	Lipid	Lysophosphatidylcholine
1-palmitoyl-GPC (16:0)	0.00315185	0.0076669	0.0833137	0.00333682	0.00290728	0.0524571	Lipid	Lysophosphatidylcholine
taurine	0.00505403	0.00107304	0.0524717	0.00346955	0.0153959	0.102921	Amino Acid	Methionine, Cysteine, SAM and Taurine Metabolism
S-methylcysteine	0.0045955	0.0042997	0.0700622	0.00338936	0.0135049	0.0983637	Amino Acid	Methionine, Cysteine, SAM and Taurine Metabolism
1-palmitoyl-2-stearoyl-GPC (16:0/18:0)	0.00300093	0.00191529	0.0550268	0.00159926	0.17931	0.378639	Lipid	Phosphatidylcholine
1-palmitoyl-2-oleoyl-GPI (16:0/18:1)*	0.00376726	0.00948187	0.0915743	-0.00123541	0.468663	0.651519	Lipid	Phosphatidylinositol
1-stearoyl-2-arachidonoyl-GPI (18:0/20:4)	0.00330907	0.00534258	0.0746435	0.000436061	0.729717	0.8389	Lipid	Phosphatidylinositol
phosphoethanolamine (PE)	0.00562928	0.000529466	0.0304599	0.00344619	0.0100856	0.0876671	Lipid	Phospholipid Metabolism
phosphocholine	0.00435058	0.00450657	0.0700622	0.00260093	0.0258265	0.132684	Lipid	Phospholipid Metabolism
1-(1-enyl-stearoyl)-2-arachidonoyl-GPE (P-18:0/20:4)*	0.00708481	1.6127e-05	0.00788613	0.00562579	0.000117405	0.0115511	Lipid	Plasmalogen
1-(1-enyl-stearoyl)-2-linoleoyl-GPE (P-18:0/18:2)*	0.0055918	0.000292586	0.0238457	0.0051402	1.6563e-05	0.00538849	Lipid	Plasmalogen
1-(1-enyl-palmitoyl)-2-linoleoyl-GPE (P-16:0/18:2)*	0.0055113	0.00203367	0.0550268	0.00692655	3.95193e-06	0.00214099	Lipid	Plasmalogen
1-(1-enyl-palmitoyl)-2-arachidonoyl-GPE (P-16:0/20:4)*	0.00483903	0.000514494	0.0304599	0.00438167	0.000247516	0.0134209	Lipid	Plasmalogen
1-(1-enyl-palmitoyl)-2-arachidonoyl-GPC (P-16:0/20:4)*	0.00465296	0.00244668	0.0576411	0.00522299	0.000119685	0.0115511	Lipid	Plasmalogen
1-(1-enyl-palmitoyl)-2-linoleoyl-GPC (P-16:0/18:2)*	0.0044753	0.00458485	0.0700622	0.00434051	0.00246941	0.0523943	Lipid	Plasmalogen
1-(1-enyl-palmitoyl)-2-palmitoyl-GPC (P-16:0/16:0)*	0.00414329	0.000243229	0.0222437	0.00414329	0.000243229	0.0134209	Lipid	Plasmalogen
hypoxanthine	0.0048077	0.0114015	0.0980765	0.000738641	0.628301	0.768566	Nucleotide	Purine Metabolism
uridine	0.00513987	0.000250185	0.0222437	0.00332335	0.0030248	0.0524571	Nucleotide	Pyrimidine Metabolism
isoursodeoxycholate	0.00835958	0.00253432	0.0576411	0.00921741	2.63137e-05	0.00642054	Lipid	Secondary Bile Acid Metabolism
ursodeoxycholate	0.00750317	0.00544566	0.0748728	0.00437868	0.0531272	0.191042	Lipid	Secondary Bile Acid Metabolism
glycolithocholate	0.00609093	0.000200798	0.0222437	0.00444727	0.0143364	0.100664	Lipid	Secondary Bile Acid Metabolism
sphinganine-1-phosphate	0.00563695	0.000126965	0.0206953	0.00176818	0.129541	0.30613	Lipid	Sphingolipid Synthesis
tricosanoyl sphingomyelin (d18:1/23:0)*	0.00515538	0.00196539	0.0550268	0.00415091	0.00266403	0.0524571	Lipid	Sphingomyelins
lignoceroyl sphingomyelin (d18:1/24:0)	0.00437003	0.00208179	0.0550268	0.00386375	0.0038884	0.0598254	Lipid	Sphingomyelins
sphingomyelin (d18:1/21:0, d17:1/22:0, d16:1/23:0)*	0.00537818	0.0062126	0.075949	0.00434718	0.00481187	0.0634647	Lipid	Sphingomyelins
sphingomyelin (d18:1/20:0, d16:1/22:0)*	0.00360118	0.00830499	0.0864072	0.00326475	0.00638576	0.0718072	Lipid	Sphingomyelins
palmitoyl sphingomyelin (d18:1/16:0)	0.00313648	0.00169643	0.0550268	0.00238288	0.00218012	0.0513839	Lipid	Sphingomyelins
sphingomyelin (d18:2/23:0, d18:1/23:1, d17:1/24:1)*	0.00520512	0.00355301	0.065563	0.00366275	0.00871672	0.081803	Lipid	Sphingomyelins
sphingomyelin (d18:1/19:0, d19:1/18:0)*	0.00530439	0.0023031	0.0576411	0.00315583	0.0267098	0.135071	Lipid	Sphingomyelins
sphingomyelin (d17:1/16:0, d18:1/15:0, d16:1/17:0)*	0.00438729	0.00373298	0.0676085	0.0024282	0.0396767	0.165886	Lipid	Sphingomyelins
sphingomyelin (d18:1/17:0, d17:1/18:0, d19:1/16:0)	0.00436714	0.00427888	0.0700622	0.00182586	0.137287	0.317516	Lipid	Sphingomyelins
sphingosine 1-phosphate	0.00515401	6.91275e-05	0.0153865	0.00252169	0.0141164	0.100566	Lipid	Sphingosines
alpha-tocopherol	0.00314096	0.00327111	0.0628348	0.0019061	0.0827332	0.24115	Cofactors and Vitamins	Tocopherol Metabolism
homoarginine	0.00670082	0.000462642	0.0304599	0.00534878	0.00398428	0.0598254	Amino Acid	Urea cycle; Arginine and Proline Metabolism
citrulline	0.0033329	0.0117607	0.0980765	0.00286765	0.0116341	0.0946236	Amino Acid	Urea cycle; Arginine and Proline Metabolism
carotene diol (2)	0.00639942	0.00189628	0.0550268	0.00681857	0.000273342	0.0140412	Cofactors and Vitamins	Vitamin A Metabolism
carotene diol (1)	0.00610828	0.00272212	0.0583235	0.00661435	0.00040529	0.0171984	Cofactors and Vitamins	Vitamin A Metabolism
caffeic acid sulfate	0.00508108	0.00936859	0.0915743	-0.00139716	0.518705	0.682285	Xenobiotics	Xanthine Metabolism
paraxanthine	0.00457101	0.0114512	0.0980765	0.000572208	0.742588	0.847679	Xenobiotics	Xanthine Metabolism
glucuronate	-0.00669163	0.00610301	0.075949	-0.00901086	5.30139e-05	0.00748048	Carbohydrate	Aminosugar Metabolism
gulonate*	-0.00706759	0.00300584	0.061244	-0.00588999	0.00642155	0.0718072	Cofactors and Vitamins	Ascorbate and Aldarate Metabolism
methyl-4-hydroxybenzoate sulfate	-0.00809852	0.00916179	0.0915743	-0.00574491	0.0301557	0.142184	Xenobiotics	Benzoate Metabolism
cortisol 21-glucuronide	-0.00535064	0.010487	0.0953772	-0.00287034	0.152477	0.341232	Lipid	Corticosteroids
desmethylnaproxen	-0.00606209	0.00388214	0.0677987	-0.00141498	0.408818	0.605137	Xenobiotics	Drug - Analgesics, Anesthetics
furosemide	-0.00817304	0.010807	0.0960838	-0.00507217	0.0466483	0.178544	Xenobiotics	Drug - Cardiovascular
adipate	-0.00530264	0.0105325	0.0953772	-0.00481032	0.0103296	0.0876671	Lipid	Fatty Acid, Dicarboxylate
alpha-ketoglutaramate*	-0.00408029	0.00955069	0.0915743	-0.00406504	0.0218475	0.123136	Amino Acid	Glutamate Metabolism
N-acetyl-aspartyl-glutamate (NAAG)	-0.00586787	0.00633569	0.0764976	-0.00515794	0.0134473	0.0983637	Amino Acid	Glutamate Metabolism
maltose	-0.00689222	0.00188331	0.0550268	-0.00512822	0.0055966	0.0682785	Carbohydrate	Glycogen Metabolism
maltotriose	-0.00742163	0.000247791	0.0222437	-0.00322807	0.0391511	0.165418	Carbohydrate	Glycogen Metabolism
N-acetylcarnosine	-0.00466216	0.011711	0.0980765	-0.0036814	0.0644975	0.211238	Amino Acid	Histidine Metabolism
hydantoin-5-propionic acid	-0.00830988	0.00294862	0.061244	-0.00489479	0.074304	0.230958	Amino Acid	Histidine Metabolism
N6,N6,N6-trimethyllysine	-0.004495	0.00695011	0.0790335	-0.0045438	0.00414458	0.0606469	Amino Acid	Lysine Metabolism
5-(galactosylhydroxy)-L-lysine	-0.00558536	0.00791824	0.0847786	-0.00487128	0.00932615	0.0836002	Amino Acid	Lysine Metabolism
pelargonate (9:0)	-0.00423772	0.00870325	0.0886644	-0.000820427	0.440744	0.634463	Lipid	Medium Chain Fatty Acid
S-adenosylhomocysteine (SAH)	-0.00491353	0.0117775	0.0980765	-0.00326501	0.0764961	0.23198	Amino Acid	Methionine, Cysteine, SAM and Taurine Metabolism
lanthionine	-0.00596594	0.00452588	0.0700622	-0.00334464	0.0940406	0.257819	Amino Acid	Methionine, Cysteine, SAM and Taurine Metabolism
5-methylthioribose	-0.00616369	0.00427427	0.0700622	-0.00428975	0.0352073	0.152046	Amino Acid	Methionine, Cysteine, SAM and Taurine Metabolism
2-oleoylglycerol (18:1)	-0.00643129	0.00647421	0.0766797	-0.00338763	0.0755532	0.23116	Lipid	Monoacylglycerol
ribitol	-0.004638	0.0101103	0.094799	-0.00395084	0.00671325	0.0728274	Carbohydrate	Pentose Metabolism
gluconate	-0.00939642	0.00522028	0.0739918	-0.0101534	0.000529701	0.0215412	Carbohydrate	Pentose Metabolism
arabitol/xylitol	-0.0062811	0.00201036	0.0550268	-0.00463181	0.00696704	0.0728274	Carbohydrate	Pentose Metabolism
1-oleoyl-2-linoleoyl-GPE (18:1/18:2)*	-0.00527274	0.00274323	0.0583235	-0.0037533	0.0243805	0.130029	Lipid	Phosphatidylethanolamine
1-oleoyl-2-docosahexaenoyl-GPE (18:1/22:6)*	-0.00532796	0.00503689	0.0724423	-0.00633595	0.00015279	0.0115511	Lipid	Phosphatidylethanolamine
(N(1) + N(8))-acetylspermidine	-0.00510193	0.00486896	0.0724423	-0.00417276	0.0195522	0.116038	Amino Acid	Polyamine Metabolism
N1,N12-diacetylspermine	-0.00766852	0.00551211	0.0748728	-0.00514683	0.0323194	0.1474	Amino Acid	Polyamine Metabolism
glycochenodeoxycholate sulfate	-0.00641509	0.00694156	0.0790335	-0.00775094	0.0110978	0.0917919	Lipid	Primary Bile Acid Metabolism
1-methyladenosine	-0.00340035	0.0118334	0.0980765	-0.00338793	0.00276956	0.0524571	Nucleotide	Purine Metabolism
N6-carbamoylthreonyladenosine	-0.00591656	0.00443166	0.0700622	-0.00424161	0.0295865	0.140861	Nucleotide	Purine Metabolism
N6-succinyladenosine	-0.00687727	0.00105122	0.0524717	-0.00541477	0.00996511	0.0876212	Nucleotide	Purine Metabolism
N-acetyl-beta-alanine	-0.00515341	0.00308214	0.0615171	-0.00418963	0.00445832	0.0621006	Nucleotide	Pyrimidine Metabolism
cytidine	-0.00544126	0.00579983	0.075949	-0.00298952	0.0898813	0.252081	Nucleotide	Pyrimidine Metabolism
delta-CEHC glucuronide*	-0.00606209	0.00388214	0.0677987	-0.00141498	0.408818	0.605137	Cofactors and Vitamins	Tocopherol Metabolism
gamma-CEHC glucuronide*	-0.00699327	0.0120943	0.0988748	-0.00129908	0.595906	0.750457	Cofactors and Vitamins	Tocopherol Metabolism
N-acetyltryptophan	-0.0167242	0.00797926	0.0847786	-0.0209955	0.000678585	0.0228379	Amino Acid	Tryptophan Metabolism
vanillactate	-0.00605482	0.0095329	0.0915743	-0.00436622	0.158915	0.352502	Amino Acid	Tyrosine Metabolism
3-methoxytyramine sulfate	-0.00723194	0.00238723	0.0576411	-0.00405041	0.0674956	0.215418	Amino Acid	Tyrosine Metabolism
homovanillate sulfate	-0.00881518	0.00602378	0.075949	-0.00616246	0.0289328	0.139741	Amino Acid	Tyrosine Metabolism
argininate*	-0.00489889	0.00760152	0.0833137	-0.00178773	0.305519	0.529639	Amino Acid	Urea cycle; Arginine and Proline Metabolism
pyridoxate	-0.0092764	0.00231146	0.0576411	0.000457054	0.86117	0.918581	Cofactors and Vitamins	Vitamin B6 Metabolism
valine	0.00174769	0.103453	0.297579	0.00287819	0.00253469	0.0524571	Amino Acid	BCAA Metabolism
carboxyethyl-GABA	-0.00316012	0.0413781	0.17749	-0.0038544	0.0127934	0.0953155	Amino Acid	Glutamate Metabolism
cysteinylglycine	-0.00556402	0.0171676	0.120791	-0.00564585	0.00395192	0.0598254	Amino Acid	Glutathione Metabolism
S-methylcysteine sulfoxide	0.00490837	0.013826	0.10322	0.00429064	0.0118874	0.0953155	Amino Acid	Methionine, Cysteine, SAM and Taurine Metabolism
4-hydroxyphenylacetate	-0.00448611	0.0999172	0.289967	-0.00641193	0.0103147	0.0876671	Amino Acid	Phenylalanine Metabolism
N-acetylputrescine	-0.00190161	0.294584	0.534514	-0.0042929	0.00701232	0.0728274	Amino Acid	Polyamine Metabolism
5-methylthioadenosine (MTA)	-0.00371118	0.102267	0.295035	-0.00486242	0.00550228	0.0679776	Amino Acid	Polyamine Metabolism
4-acetamidobutanoate	-0.00452252	0.0346489	0.165301	-0.00546976	0.0124138	0.0953155	Amino Acid	Polyamine Metabolism
N-acetyl-isoputreanine*	-0.00388341	0.068951	0.242769	-0.00609842	0.00464482	0.0621006	Amino Acid	Polyamine Metabolism
serotonin	0.00323372	0.199504	0.419156	0.00721754	0.000400145	0.0171984	Amino Acid	Tryptophan Metabolism
indolelactate	-0.00222161	0.20869	0.42788	-0.00463366	0.00979228	0.0868842	Amino Acid	Tryptophan Metabolism
thyroxine	0.00362009	0.018174	0.123207	0.00661215	3.5383e-05	0.00690676	Amino Acid	Tyrosine Metabolism
3-(4-hydroxyphenyl)lactate (HPLA)	-0.00216701	0.200149	0.419156	-0.00509288	0.0101624	0.0876671	Amino Acid	Tyrosine Metabolism
homovanillate (HVA)	-0.00561269	0.0185098	0.123207	-0.00566711	0.00727989	0.0728274	Amino Acid	Tyrosine Metabolism
phenol glucuronide	-0.000922274	0.68647	0.838162	-0.00618067	0.0104682	0.0880769	Amino Acid	Tyrosine Metabolism
vanillylmandelate (VMA)	-0.00541004	0.0246531	0.137456	-0.00668259	0.00727084	0.0728274	Amino Acid	Tyrosine Metabolism
arginine	0.00220312	0.127906	0.331444	0.00286015	0.0126829	0.0953155	Amino Acid	Urea cycle; Arginine and Proline Metabolism
N-acetylglucosamine/N-acetylgalactosamine	-0.00296987	0.0539531	0.209389	-0.00393595	0.00303401	0.0524571	Carbohydrate	Aminosugar Metabolism
fructose	0.000499936	0.717521	0.853858	0.00275623	0.0111928	0.0918	Carbohydrate	Fructose, Mannose and Galactose Metabolism
nicotinamide riboside	-0.00306792	0.0809866	0.263381	-0.00574034	0.00306358	0.0524571	Cofactors and Vitamins	Nicotinate and Nicotinamide Metabolism
alpha-ketoglutarate	-0.00250322	0.120988	0.323296	-0.0038058	0.00612463	0.0718072	Energy	TCA Cycle
androstenediol (3alpha, 17alpha) monosulfate (2)	0.00205431	0.354437	0.589646	0.00396125	0.012306	0.0953155	Lipid	Androgenic Steroids
ceramide (d18:1/17:0, d17:1/18:0)*	-0.000181919	0.914522	0.960159	-0.0048673	0.00184125	0.0449265	Lipid	Ceramides
N-stearoyl-sphingosine (d18:1/18:0)*	-0.0015866	0.362297	0.595994	-0.0049395	0.00158954	0.0408262	Lipid	Ceramides
N-palmitoyl-sphingosine (d18:1/16:0)	-0.00207905	0.186547	0.410085	-0.00496442	0.000980488	0.0295083	Lipid	Ceramides
N-stearoyl-sphingadienine (d18:2/18:0)*	-0.00198938	0.273087	0.507755	-0.00524924	0.000643532	0.0228379	Lipid	Ceramides
suberate (C8-DC)	-0.00434812	0.0178959	0.123207	-0.00512597	0.00647442	0.0718072	Lipid	Fatty Acid, Dicarboxylate
heptenedioate (C7:1-DC)*	-0.00160582	0.507984	0.72421	-0.00535429	0.0127394	0.0953155	Lipid	Fatty Acid, Dicarboxylate
3-methyladipate	-0.0046938	0.033862	0.162435	-0.00647689	0.00536367	0.0671146	Lipid	Fatty Acid, Dicarboxylate
2-hydroxyadipate	-0.00376502	0.0829529	0.265124	-0.00651992	0.00517637	0.0664754	Lipid	Fatty Acid, Dicarboxylate
3-hydroxyadipate*	-0.00246988	0.331399	0.567615	-0.00836714	0.000384491	0.0171984	Lipid	Fatty Acid, Dicarboxylate
2-hydroxynervonate*	-0.0018099	0.196891	0.415783	-0.00404441	0.00367921	0.0598254	Lipid	Fatty Acid, Monohydroxy
2-hydroxydecanoate	-0.00161388	0.344728	0.582287	-0.00486945	0.00222443	0.0513839	Lipid	Fatty Acid, Monohydroxy
arachidate (20:0)	-0.000727961	0.560834	0.755503	-0.00286933	0.00731259	0.0728274	Lipid	Long Chain Fatty Acid
oleate/vaccenate (18:1)	-0.000634137	0.690197	0.841662	-0.00357154	0.00620177	0.0718072	Lipid	Long Chain Fatty Acid
eicosenoate (20:1n9 or 1n11)	-0.00109363	0.516435	0.727506	-0.00383498	0.00673326	0.0728274	Lipid	Long Chain Fatty Acid
erucate (22:1n9)	-0.00220849	0.171792	0.390403	-0.00552838	5.61767e-05	0.00748048	Lipid	Long Chain Fatty Acid
malonylcarnitine (C3-DC)	-0.00358103	0.0701185	0.244914	-0.00471294	0.00288584	0.0524571	Lipid	Short-chain Acylcarnitine
3-methyladipoylcarnitine (C7-DC)	-0.00434953	0.0679417	0.241477	-0.00540146	0.0133689	0.0983637	Lipid	Short-chain Acylcarnitine
suberoylcarnitine (C8-DC)	-0.00623511	0.0137188	0.103207	-0.00677422	0.0042254	0.0606469	Lipid	Medium-chain Acylcarnitine
octadecanedioylcarnitine (C18-DC)*	-0.00237201	0.195242	0.415102	-0.00613616	0.00821718	0.0794057	Lipid	Long-chain Acylcarnitine
octadecenedioylcarnitine (C18:1-DC)*	-0.00460959	0.0405757	0.177416	-0.00882912	0.00278082	0.0524571	Lipid	Long-chain Acylcarnitine
1-lignoceroyl-GPC (24:0)	0.00463634	0.0233847	0.136266	0.0054432	0.0013963	0.0369988	Lipid	Lysophosphatidylcholine
1-cerotoyl-GPC (26:0)*	0.00213503	0.222849	0.443883	0.00513703	0.000648735	0.0228379	Lipid	Lysophosphatidylcholine
2-palmitoyl-GPC* (16:0)*	0.00294633	0.0666954	0.239809	0.00380393	0.00534473	0.0671146	Lipid	Lysophosphatidylcholine
1-stearoyl-GPC (18:0)	0.00284479	0.0368857	0.169884	0.00377921	0.00430693	0.0609213	Lipid	Lysophosphatidylcholine
1-(1-enyl-oleoyl)-GPE (P-18:1)*	0.00372122	0.0424422	0.180472	0.00477576	0.00140262	0.0369988	Lipid	Lysoplasmalogen
1-(1-enyl-palmitoyl)-GPE (P-16:0)*	0.00346712	0.0380062	0.171291	0.00447905	0.00107455	0.0308458	Lipid	Lysoplasmalogen
3-hydroxy-3-methylglutarate	-0.00357659	0.0767413	0.260601	-0.00448862	0.0121842	0.0953155	Lipid	Mevalonate Metabolism
1-oleoylglycerol (18:1)	-0.00352666	0.167467	0.384854	-0.00562792	0.00384735	0.0598254	Lipid	Monoacylglycerol
1-palmitoleoylglycerol (16:1)*	-0.00498205	0.052127	0.20474	-0.00647962	0.00165603	0.0414433	Lipid	Monoacylglycerol
1-palmitoyl-2-oleoyl-GPC (16:0/18:1)	-0.000249182	0.799019	0.898207	-0.00234881	0.0127647	0.0953155	Lipid	Phosphatidylcholine
1-stearoyl-2-oleoyl-GPC (18:0/18:1)	-0.0011892	0.323843	0.563555	-0.0031457	0.00717275	0.0728274	Lipid	Phosphatidylcholine
1-palmitoyl-2-palmitoleoyl-GPC (16:0/16:1)*	-0.00159095	0.307253	0.544372	-0.00535162	0.00113912	0.031765	Lipid	Phosphatidylcholine
1-oleoyl-2-arachidonoyl-GPE (18:1/20:4)*	-0.00290624	0.0794092	0.263381	-0.00396278	0.00606164	0.0718072	Lipid	Phosphatidylethanolamine
1-palmitoyl-2-docosahexaenoyl-GPE (16:0/22:6)*	-0.00254849	0.141645	0.348939	-0.00434856	0.00231649	0.0513839	Lipid	Phosphatidylethanolamine
1-palmitoyl-2-oleoyl-GPE (16:0/18:1)	-0.00348626	0.058124	0.217981	-0.00466743	0.00575191	0.069307	Lipid	Phosphatidylethanolamine
1-stearoyl-2-oleoyl-GPE (18:0/18:1)	-0.00323879	0.0908729	0.276005	-0.00478509	0.00904444	0.0836002	Lipid	Phosphatidylethanolamine
glycerophosphorylcholine (GPC)	0.00128885	0.389347	0.621178	0.00380528	0.0045326	0.0621006	Lipid	Phospholipid Metabolism
docosapentaenoate (DPA; 22:5n3)	-0.00107611	0.559503	0.755051	-0.0039062	0.00929164	0.0836002	Lipid	Polyunsaturated Fatty Acid (n3 and n6)
eicosapentaenoate (EPA; 20:5n3)	-0.00402231	0.0545504	0.21004	-0.00502896	0.0107116	0.089355	Lipid	Polyunsaturated Fatty Acid (n3 and n6)
stearidonate (18:4n3)	-0.00427674	0.086844	0.270489	-0.00594854	0.00782	0.0763232	Lipid	Polyunsaturated Fatty Acid (n3 and n6)
docosatrienoate (22:3n6)*	-0.00117569	0.585861	0.767038	-0.00759027	6.13154e-05	0.00748048	Lipid	Polyunsaturated Fatty Acid (n3 and n6)
glycocholate	-0.00471414	0.0773633	0.26082	-0.00718515	0.00933649	0.0836002	Lipid	Primary Bile Acid Metabolism
glycocholate sulfate	-0.00704788	0.0163897	0.11684	-0.00889637	0.000997721	0.0295083	Lipid	Primary Bile Acid Metabolism
taurocholate	-0.00475732	0.111115	0.308724	-0.00925737	0.00418859	0.0606469	Lipid	Primary Bile Acid Metabolism
5alpha-pregnan-3beta,20alpha-diol monosulfate (2)	0.0028655	0.212832	0.43455	0.00448539	0.00460101	0.0621006	Lipid	Progestin Steroids
7-ketodeoxycholate	0.00326804	0.238936	0.461357	0.00550062	0.000600573	0.0228379	Lipid	Secondary Bile Acid Metabolism
3b-hydroxy-5-cholenoic acid	0.00083201	0.661025	0.822491	0.0045599	0.000815911	0.0258792	Lipid	Secondary Bile Acid Metabolism
sphingomyelin (d18:2/24:2)*	0.00145209	0.360718	0.595916	0.00582137	4.38727e-06	0.00214099	Lipid	Sphingomyelins
sphingomyelin (d18:1/22:2, d18:2/22:1, d16:1/24:2)*	0.00125579	0.363581	0.596615	0.00440401	0.000140435	0.0115511	Lipid	Sphingomyelins
sphingomyelin (d18:1/20:1, d18:2/20:0)*	0.00371065	0.0163892	0.11684	0.00379644	0.00285688	0.0524571	Lipid	Sphingomyelins
sphingomyelin (d18:1/22:1, d18:2/22:0, d16:1/24:1)*	0.00252113	0.0670489	0.240197	0.00363168	0.000821981	0.0258792	Lipid	Sphingomyelins
sphingomyelin (d18:1/20:2, d18:2/20:1, d16:1/22:2)*	-0.00027936	0.854106	0.924362	0.0035517	0.00871155	0.081803	Lipid	Sphingomyelins
sphingomyelin (d18:2/24:1, d18:1/24:2)*	0.00186922	0.129352	0.332038	0.00302995	0.00231176	0.0513839	Lipid	Sphingomyelins
inosine 5'-monophosphate (IMP)	0.00254905	0.16975	0.386982	0.00412532	0.00842642	0.0806293	Nucleotide	Purine Metabolism
7-methylguanine	-0.00112905	0.423052	0.655697	-0.00407516	0.00267338	0.0524571	Nucleotide	Purine Metabolism
adenosine	-0.00372125	0.0374946	0.170557	-0.00433314	0.012683	0.0953155	Nucleotide	Purine Metabolism
pseudouridine	-0.00333651	0.0441499	0.185316	-0.00372131	0.0119705	0.0953155	Nucleotide	Pyrimidine Metabolism
5,6-dihydrouridine	-0.00370241	0.0388395	0.171878	-0.00438583	0.00631469	0.0718072	Nucleotide	Pyrimidine Metabolism
2-hydroxyhippurate (salicylurate)	-0.00435922	0.345661	0.582856	-0.00885054	0.0122085	0.0953155	Xenobiotics	Benzoate Metabolism
salicyluric glucuronide*	-0.00562247	0.107682	0.302271	-0.00743522	0.00922947	0.0836002	Xenobiotics	Drug - Analgesics, Anesthetics
omeprazole	0.000654489	0.810028	0.906941	0.00580098	0.00721801	0.0728274	Xenobiotics	Drug - Gastrointestinal
allopurinol	2.97959e-05	0.968066	0.987832	0.00239067	0.00772512	0.0761587	Xenobiotics	Drug - Metabolic
hydroxypioglitazone (M-IV)	-0.00116573	0.237916	0.460756	0.000990058	0.00365928	0.0598254	Xenobiotics	Drug - Metabolic
levetiracetam	-0.000893503	0.584946	0.767038	0.0043347	0.00367726	0.0598254	Xenobiotics	Drug - Neurological
pregabalin	-0.000308701	0.647313	0.812672	0.000185741	0.000663448	0.0228379	Xenobiotics	Drug - Neurological
quetiapine	-5.71635e-05	0.941907	0.976867	0.00387367	0.00507909	0.0660959	Xenobiotics	Drug - Psychoactive
hydroxyasparagine	-0.00345205	0.0448151	0.18718	-0.00321522	0.0450765	0.174589	Amino Acid	Alanine and Aspartate Metabolism
N-acetylaspartate (NAA)	-0.00385785	0.0140793	0.104314	-0.00169342	0.113957	0.286654	Amino Acid	Alanine and Aspartate Metabolism
aspartate	0.00120335	0.624345	0.794031	-0.00192064	0.121763	0.294773	Amino Acid	Alanine and Aspartate Metabolism
N-acetylalanine	-0.0027431	0.0580489	0.217981	-0.00162792	0.194946	0.398883	Amino Acid	Alanine and Aspartate Metabolism
alanine	0.00266304	0.0464213	0.188382	0.000262814	0.803896	0.886557	Amino Acid	Alanine and Aspartate Metabolism
3-methylglutaconate	-0.00428234	0.0612182	0.226786	-0.00455319	0.0341437	0.15088	Amino Acid	BCAA Metabolism
3-methyl-2-oxobutyrate	0.00230486	0.0387515	0.171878	0.00210699	0.0409615	0.165886	Amino Acid	BCAA Metabolism
methylsuccinate	-0.0026528	0.162886	0.37839	-0.00358821	0.0529817	0.191042	Amino Acid	BCAA Metabolism
ethylmalonate	-2.22741e-05	0.991266	0.995922	-0.00271319	0.103522	0.273428	Amino Acid	BCAA Metabolism
N-acetylvaline	-0.00169908	0.24111	0.463272	-0.00220342	0.113327	0.285806	Amino Acid	BCAA Metabolism
isobutyrylglycine (C4)	-0.00519618	0.0247364	0.137456	-0.00289035	0.116276	0.287696	Amino Acid	BCAA Metabolism
isovalerate (C5)	-0.000333294	0.865022	0.928685	0.00221068	0.116741	0.287696	Amino Acid	BCAA Metabolism
2,3-dihydroxy-2-methylbutyrate	-0.00393597	0.0412332	0.17749	-0.00275467	0.164954	0.360167	Amino Acid	BCAA Metabolism
3-hydroxyisobutyrate	-0.000907704	0.533812	0.737385	-0.00154032	0.297333	0.520067	Amino Acid	BCAA Metabolism
alpha-hydroxyisocaproate	0.00242032	0.0696627	0.244194	0.00137247	0.307654	0.529835	Amino Acid	BCAA Metabolism
beta-hydroxyisovalerate	-0.000166887	0.921646	0.963002	-0.00157383	0.316826	0.534062	Amino Acid	BCAA Metabolism
2-hydroxy-3-methylvalerate	-0.00082496	0.591281	0.770004	-0.00155534	0.346665	0.558325	Amino Acid	BCAA Metabolism
N-acetylisoleucine	-0.00102199	0.46616	0.691813	-0.00105254	0.445465	0.636565	Amino Acid	BCAA Metabolism
alpha-hydroxyisovalerate	-0.000182735	0.919807	0.962159	-0.000562507	0.723877	0.83709	Amino Acid	BCAA Metabolism
3-hydroxy-2-ethylpropionate	0.00119432	0.404415	0.634445	-0.000326221	0.820834	0.893125	Amino Acid	BCAA Metabolism
N-acetylleucine	-0.00111986	0.479746	0.702383	0.000123981	0.93315	0.962743	Amino Acid	BCAA Metabolism
creatinine	-0.0024256	0.0955403	0.280422	-0.00216008	0.118574	0.290774	Amino Acid	Creatine Metabolism
creatine	-0.00176787	0.242374	0.463879	-0.00231417	0.182096	0.380522	Amino Acid	Creatine Metabolism
beta-citrylglutamate	-0.00369181	0.0690079	0.242769	-0.00417029	0.0138958	0.100205	Amino Acid	Glutamate Metabolism
N-acetylglutamine	-0.0041924	0.045672	0.187677	-0.00369084	0.0594627	0.204351	Amino Acid	Glutamate Metabolism
citramalate	-0.00241202	0.216893	0.437979	-0.00300583	0.0829272	0.24115	Amino Acid	Glutamate Metabolism
N-acetylglutamate	-0.000416482	0.824333	0.913638	-0.00260161	0.132785	0.309566	Amino Acid	Glutamate Metabolism
N-methyl-GABA	-0.00421821	0.17995	0.401573	-0.00158357	0.350588	0.56096	Amino Acid	Glutamate Metabolism
S-1-pyrroline-5-carboxylate	-0.000535558	0.70628	0.849621	0.000990901	0.449671	0.639766	Amino Acid	Glutamate Metabolism
pyroglutamine*	-0.00180081	0.354511	0.589646	0.00139727	0.496934	0.668231	Amino Acid	Glutamate Metabolism
glutamate	-0.000453596	0.765549	0.881869	-0.000764588	0.550406	0.712462	Amino Acid	Glutamate Metabolism
glutamine	0.00165262	0.141123	0.348939	0.000335422	0.72942	0.8389	Amino Acid	Glutamate Metabolism
4-hydroxyglutamate	-0.00068245	0.700509	0.847894	2.92709e-05	0.985344	0.98716	Amino Acid	Glutamate Metabolism
5-oxoproline	0.000185626	0.935174	0.971945	-0.0022158	0.0342367	0.15088	Amino Acid	Glutathione Metabolism
cys-gly, oxidized	-7.77926e-05	0.967376	0.987832	-0.00310537	0.0774419	0.233282	Amino Acid	Glutathione Metabolism
cysteine-glutathione disulfide	0.00500972	0.0207048	0.12816	0.00142392	0.489217	0.664379	Amino Acid	Glutathione Metabolism
2-hydroxybutyrate/2-hydroxyisobutyrate	0.00126168	0.381291	0.616368	0.000294653	0.80914	0.889449	Amino Acid	Glutathione Metabolism
cysteinylglycine disulfide*	0.00226103	0.127469	0.331444	-0.000184847	0.873121	0.921366	Amino Acid	Glutathione Metabolism
N-acetylserine	-0.00392156	0.0223766	0.132667	-0.00253592	0.0975271	0.265436	Amino Acid	Glycine, Serine and Threonine Metabolism
N-acetylthreonine	-0.00312957	0.0575023	0.217981	-0.00235913	0.126581	0.301324	Amino Acid	Glycine, Serine and Threonine Metabolism
glycine	0.000310861	0.829561	0.913638	-0.00154109	0.139013	0.31964	Amino Acid	Glycine, Serine and Threonine Metabolism
2-methylserine	0.0036267	0.0537544	0.209389	0.00144296	0.247492	0.464195	Amino Acid	Glycine, Serine and Threonine Metabolism
serine	0.00174166	0.20354	0.421412	0.000996243	0.314798	0.533407	Amino Acid	Glycine, Serine and Threonine Metabolism
allo-threonine	-0.00514878	0.0130607	0.101401	-0.00160588	0.328126	0.54188	Amino Acid	Glycine, Serine and Threonine Metabolism
N-acetylglycine	0.000554819	0.769484	0.885359	0.00119345	0.36822	0.572401	Amino Acid	Glycine, Serine and Threonine Metabolism
threonine	0.00232592	0.0841999	0.267855	0.000800295	0.46882	0.651519	Amino Acid	Glycine, Serine and Threonine Metabolism
betaine	0.00151269	0.227899	0.448462	0.000571409	0.65375	0.785782	Amino Acid	Glycine, Serine and Threonine Metabolism
dimethylglycine	-0.00103004	0.53354	0.737385	0.00052797	0.709997	0.827198	Amino Acid	Glycine, Serine and Threonine Metabolism
sarcosine	-0.000930818	0.479297	0.702383	-1.21179e-05	0.992381	0.992381	Amino Acid	Glycine, Serine and Threonine Metabolism
1-methylguanidine	-0.0065522	0.0223825	0.132667	-0.00561152	0.0609546	0.206568	Amino Acid	Guanidino and Acetamido Metabolism
4-guanidinobutanoate	-0.00242783	0.167846	0.384854	-0.0021701	0.337929	0.550952	Amino Acid	Guanidino and Acetamido Metabolism
guanidinosuccinate	-0.0049186	0.0797082	0.263381	-0.00235593	0.358677	0.568293	Amino Acid	Guanidino and Acetamido Metabolism
1-methyl-4-imidazoleacetate	-0.00201856	0.348324	0.585406	-0.00461871	0.0203931	0.119184	Amino Acid	Histidine Metabolism
1-methylhistidine	-0.00256026	0.232735	0.453416	-0.00377082	0.0408623	0.165886	Amino Acid	Histidine Metabolism
imidazole lactate	-0.00437002	0.0681468	0.241477	-0.00314202	0.0426121	0.170939	Amino Acid	Histidine Metabolism
imidazole propionate	-0.00291501	0.299026	0.537587	-0.00571099	0.0665729	0.21444	Amino Acid	Histidine Metabolism
N-acetylhistidine	-0.00483575	0.0227982	0.134317	-0.00275498	0.0887737	0.250414	Amino Acid	Histidine Metabolism
formiminoglutamate	-0.00378907	0.0747389	0.256848	-0.0035573	0.107531	0.278383	Amino Acid	Histidine Metabolism
N-acetyl-1-methylhistidine*	-0.00439195	0.108175	0.302271	-0.00421275	0.114716	0.287055	Amino Acid	Histidine Metabolism
1-ribosyl-imidazoleacetate*	-0.00389125	0.0937253	0.278709	-0.00234847	0.220735	0.432723	Amino Acid	Histidine Metabolism
trans-urocanate	0.000985124	0.72202	0.855925	-0.00230706	0.356867	0.56828	Amino Acid	Histidine Metabolism
3-methylhistidine	0.00145954	0.546185	0.747374	-0.00221614	0.359399	0.568515	Amino Acid	Histidine Metabolism
cis-urocanate	0.00174949	0.526077	0.733957	-0.00100876	0.626704	0.768566	Amino Acid	Histidine Metabolism
histidine	3.69379e-05	0.983921	0.995547	-0.000423892	0.63265	0.768566	Amino Acid	Histidine Metabolism
N-acetyl-3-methylhistidine*	-0.000418487	0.79341	0.898207	-0.000361122	0.867494	0.921081	Amino Acid	Histidine Metabolism
N-acetyl-cadaverine	0.00199667	0.438644	0.671626	-0.00482138	0.0315309	0.145557	Amino Acid	Lysine Metabolism
5-hydroxylysine	-0.000438878	0.787352	0.898207	-0.00283237	0.0342845	0.15088	Amino Acid	Lysine Metabolism
5-aminovalerate	0.00136444	0.507773	0.72421	-0.00298464	0.119977	0.293023	Amino Acid	Lysine Metabolism
N6-acetyllysine	-0.00114914	0.511851	0.72624	-0.00205566	0.135443	0.314743	Amino Acid	Lysine Metabolism
N2-acetyllysine	-0.000127782	0.944659	0.978683	-0.00192448	0.271289	0.49033	Amino Acid	Lysine Metabolism
6-oxopiperidine-2-carboxylate	-0.003415	0.139065	0.347801	-0.00151543	0.367122	0.572401	Amino Acid	Lysine Metabolism
N,N,N-trimethyl-5-aminovalerate	0.000892919	0.661862	0.822491	-0.00081152	0.633122	0.768566	Amino Acid	Lysine Metabolism
lysine	0.00187065	0.0894016	0.274729	0.000358176	0.710238	0.827198	Amino Acid	Lysine Metabolism
pipecolate	-0.00109547	0.549578	0.747548	0.000123253	0.947711	0.970501	Amino Acid	Lysine Metabolism
cysteine	-0.00311171	0.0251902	0.139186	-0.00370215	0.0148102	0.101374	Amino Acid	Methionine, Cysteine, SAM and Taurine Metabolism
cystathionine	-0.00484219	0.0218103	0.130862	-0.00434406	0.0404953	0.165886	Amino Acid	Methionine, Cysteine, SAM and Taurine Metabolism
cystine	0.00392632	0.0338821	0.162435	0.00288482	0.0407472	0.165886	Amino Acid	Methionine, Cysteine, SAM and Taurine Metabolism
N-acetyltaurine	-0.00319022	0.134537	0.340874	-0.0030849	0.0414404	0.167132	Amino Acid	Methionine, Cysteine, SAM and Taurine Metabolism
N-methyltaurine	-0.001904	0.157911	0.370353	0.00171129	0.179169	0.378639	Amino Acid	Methionine, Cysteine, SAM and Taurine Metabolism
methionine sulfoxide	-0.00299748	0.0430211	0.182141	-0.00190695	0.299116	0.521804	Amino Acid	Methionine, Cysteine, SAM and Taurine Metabolism
S-methylmethionine	0.00336363	0.0395773	0.174354	0.00134944	0.338942	0.551345	Amino Acid	Methionine, Cysteine, SAM and Taurine Metabolism
N-formylmethionine	-0.00160171	0.314434	0.554084	-0.0012768	0.365015	0.572159	Amino Acid	Methionine, Cysteine, SAM and Taurine Metabolism
methionine sulfone	0.00241474	0.245364	0.466859	-0.0015671	0.397724	0.599331	Amino Acid	Methionine, Cysteine, SAM and Taurine Metabolism
N-acetylmethionine	0.000737042	0.733098	0.860709	0.00157941	0.399452	0.600717	Amino Acid	Methionine, Cysteine, SAM and Taurine Metabolism
cysteine s-sulfate	-0.00250804	0.196333	0.415614	-0.00129234	0.515497	0.682285	Amino Acid	Methionine, Cysteine, SAM and Taurine Metabolism
hypotaurine	0.00341974	0.0809705	0.263381	-0.000842583	0.610177	0.760579	Amino Acid	Methionine, Cysteine, SAM and Taurine Metabolism
3-sulfo-L-alanine	0.000241137	0.879288	0.934721	0.000400917	0.782287	0.874585	Amino Acid	Methionine, Cysteine, SAM and Taurine Metabolism
cysteine sulfinic acid	-5.63681e-05	0.968132	0.987832	-0.00033006	0.784288	0.875819	Amino Acid	Methionine, Cysteine, SAM and Taurine Metabolism
alpha-ketobutyrate	1.62697e-05	0.991822	0.995922	0.000366469	0.792165	0.879583	Amino Acid	Methionine, Cysteine, SAM and Taurine Metabolism
methionine	-8.54026e-05	0.950577	0.981694	-0.000313968	0.822983	0.893472	Amino Acid	Methionine, Cysteine, SAM and Taurine Metabolism
phenyllactate (PLA)	-0.00112553	0.517734	0.727506	-0.00435192	0.0211417	0.121378	Amino Acid	Phenylalanine Metabolism
N-acetylphenylalanine	-0.00290061	0.132866	0.338029	-0.00310526	0.169314	0.365598	Amino Acid	Phenylalanine Metabolism
phenylacetate	0.00269031	0.21869	0.44008	0.00228299	0.246262	0.464124	Amino Acid	Phenylalanine Metabolism
phenylalanine	0.00125426	0.236826	0.459556	0.00102023	0.296392	0.52006	Amino Acid	Phenylalanine Metabolism
phenylpyruvate	0.00124479	0.431013	0.662785	5.97244e-05	0.967513	0.980574	Amino Acid	Phenylalanine Metabolism
acisoga	-0.00340286	0.092931	0.278709	-0.00268967	0.139188	0.31964	Amino Acid	Polyamine Metabolism
spermidine	0.00304095	0.0853097	0.268273	0.00145498	0.33709	0.550952	Amino Acid	Polyamine Metabolism
kynurenine	-0.00165107	0.286397	0.525509	-0.00347663	0.0245982	0.130477	Amino Acid	Tryptophan Metabolism
picolinate	-0.00431159	0.0560685	0.214199	-0.00487332	0.0441518	0.174462	Amino Acid	Tryptophan Metabolism
kynurenate	-0.00671083	0.0150697	0.109172	-0.0058685	0.051555	0.189878	Amino Acid	Tryptophan Metabolism
tryptophan	0.00256964	0.0330613	0.162435	0.00176233	0.109212	0.280501	Amino Acid	Tryptophan Metabolism
N-acetylkynurenine (2)	-0.00621257	0.0128304	0.101401	-0.00482329	0.111412	0.283836	Amino Acid	Tryptophan Metabolism
C-glycosyltryptophan	-0.0029878	0.11526	0.31373	-0.00238297	0.170407	0.366338	Amino Acid	Tryptophan Metabolism
indole-3-carboxylate	-0.000499812	0.755448	0.877411	0.00174492	0.243107	0.460723	Amino Acid	Tryptophan Metabolism
indoleacetylglutamine	-0.00428846	0.164591	0.381445	-0.00236428	0.375982	0.579714	Amino Acid	Tryptophan Metabolism
N-formylanthranilic acid	-0.0028436	0.0926656	0.278709	-0.00160898	0.391436	0.594155	Amino Acid	Tryptophan Metabolism
3-indoxyl sulfate	0.000101595	0.967284	0.987832	-0.00166717	0.518182	0.682285	Amino Acid	Tryptophan Metabolism
indoleacetate	-0.000390858	0.849577	0.923275	-0.0010694	0.557795	0.718216	Amino Acid	Tryptophan Metabolism
xanthurenate	-0.00141324	0.548413	0.747548	-0.000889579	0.694813	0.820811	Amino Acid	Tryptophan Metabolism
indolepropionate	0.00183096	0.377938	0.612975	0.000676592	0.808603	0.889449	Amino Acid	Tryptophan Metabolism
tryptophan betaine	2.14142e-05	0.993612	0.995922	-0.0005981	0.858254	0.917476	Amino Acid	Tryptophan Metabolism
4-hydroxyphenylacetatoylcarnitine	0.000600905	0.857765	0.926955	-0.00593606	0.0147944	0.101374	Amino Acid	Tyrosine Metabolism
tyramine O-sulfate	-0.00512087	0.129155	0.332038	-0.00628842	0.0196324	0.116038	Amino Acid	Tyrosine Metabolism
5-hydroxymethyl-2-furoic acid	0.00147757	0.465241	0.691813	-0.00387059	0.0219524	0.123136	Amino Acid	Tyrosine Metabolism
N-acetyltyrosine	-0.00473316	0.01348	0.102599	-0.00513948	0.0407354	0.165886	Amino Acid	Tyrosine Metabolism
2-hydroxyphenylacetate	-0.00449197	0.0288866	0.150272	-0.00398889	0.049855	0.184312	Amino Acid	Tyrosine Metabolism
gentisate	0.00297848	0.197263	0.415783	-0.00367824	0.0621842	0.207233	Amino Acid	Tyrosine Metabolism
phenol sulfate	0.00216241	0.402775	0.634445	-0.00449306	0.0644304	0.211238	Amino Acid	Tyrosine Metabolism
indoxyl glucuronide	-0.00318973	0.188737	0.410631	-0.00473187	0.0912733	0.253686	Amino Acid	Tyrosine Metabolism
4-methoxyphenol sulfate	0.000924671	0.737902	0.864274	-0.00284306	0.143461	0.325623	Amino Acid	Tyrosine Metabolism
N-formylphenylalanine	-0.0060789	0.0149229	0.108915	-0.00267413	0.206668	0.415036	Amino Acid	Tyrosine Metabolism
3-hydroxyphenylacetate sulfate	-0.00245491	0.180256	0.401573	-0.00166194	0.329802	0.543728	Amino Acid	Tyrosine Metabolism
3-methoxytyrosine	0.00111451	0.549527	0.747548	0.00204668	0.350528	0.56096	Amino Acid	Tyrosine Metabolism
3,4-dihydroxyphenylacetate sulfate	-0.00328066	0.172847	0.390403	-0.00123788	0.514127	0.681777	Amino Acid	Tyrosine Metabolism
4-hydroxyphenylpyruvate	0.00204999	0.239239	0.461357	0.000980105	0.54975	0.712462	Amino Acid	Tyrosine Metabolism
vanillic alcohol sulfate	-0.00256594	0.453248	0.687178	0.00145812	0.594235	0.749319	Amino Acid	Tyrosine Metabolism
dopamine 3-O-sulfate	-0.00355628	0.127618	0.331444	-0.000810666	0.660142	0.791522	Amino Acid	Tyrosine Metabolism
dopamine 4-sulfate	-0.00447152	0.0451682	0.18718	-0.000721152	0.721817	0.836807	Amino Acid	Tyrosine Metabolism
p-cresol glucuronide*	-0.00403686	0.173421	0.390796	0.000224296	0.938949	0.967102	Amino Acid	Tyrosine Metabolism
tyrosine	0.00275865	0.0135331	0.102599	-4.96114e-05	0.966251	0.980574	Amino Acid	Tyrosine Metabolism
prolylhydroxyproline	-0.00333605	0.0336175	0.162435	-0.0032985	0.0316753	0.145557	Amino Acid	Urea cycle; Arginine and Proline Metabolism
urea	-0.00401887	0.0217417	0.130862	-0.00335922	0.0332586	0.150424	Amino Acid	Urea cycle; Arginine and Proline Metabolism
3-hydroxyproline	-0.00276025	0.0411098	0.17749	-0.00216201	0.0470977	0.17956	Amino Acid	Urea cycle; Arginine and Proline Metabolism
N-methylhydroxyproline	-0.00859549	0.125462	0.331444	-0.00779203	0.0798142	0.236123	Amino Acid	Urea cycle; Arginine and Proline Metabolism
ornithine	0.00123816	0.333105	0.569539	0.00162669	0.111673	0.283836	Amino Acid	Urea cycle; Arginine and Proline Metabolism
hydroxyproline	0.000311073	0.828362	0.913638	-0.00208754	0.114998	0.287055	Amino Acid	Urea cycle; Arginine and Proline Metabolism
N-delta-acetylornithine	-0.000751574	0.718533	0.853858	0.00266157	0.124458	0.298454	Amino Acid	Urea cycle; Arginine and Proline Metabolism
N-acetylarginine	0.00176041	0.356469	0.591154	0.0022429	0.125183	0.299458	Amino Acid	Urea cycle; Arginine and Proline Metabolism
N-methylproline	-0.00168464	0.502841	0.721083	-0.00341755	0.130875	0.307447	Amino Acid	Urea cycle; Arginine and Proline Metabolism
homocitrulline	-0.00177199	0.450193	0.683679	-0.0019318	0.34909	0.56096	Amino Acid	Urea cycle; Arginine and Proline Metabolism
dimethylarginine (ADMA + SDMA)	-0.00109069	0.429252	0.662159	-0.00104382	0.402628	0.603775	Amino Acid	Urea cycle; Arginine and Proline Metabolism
proline	0.00171944	0.210527	0.430744	0.000950244	0.416065	0.608814	Amino Acid	Urea cycle; Arginine and Proline Metabolism
N-acetylproline	-0.000395637	0.844442	0.921723	-0.00135638	0.440407	0.634463	Amino Acid	Urea cycle; Arginine and Proline Metabolism
N-acetylcitrulline	-0.00504709	0.0277068	0.146621	-0.00108286	0.65455	0.785782	Amino Acid	Urea cycle; Arginine and Proline Metabolism
N2,N5-diacetylornithine	-0.00190506	0.421005	0.65356	0.000590104	0.801552	0.884972	Amino Acid	Urea cycle; Arginine and Proline Metabolism
2-oxoarginine*	-0.00190725	0.271982	0.506843	-5.59911e-05	0.972392	0.983477	Amino Acid	Urea cycle; Arginine and Proline Metabolism
N6-carboxymethyllysine	-0.0026765	0.191674	0.412282	-0.00246452	0.176416	0.377004	Carbohydrate	Advanced Glycation End-product
N-acetylneuraminate	-0.00395592	0.0271808	0.146059	-0.00428978	0.0183147	0.109663	Carbohydrate	Aminosugar Metabolism
erythronate*	-0.00361416	0.0450022	0.18718	-0.00356084	0.0297498	0.14095	Carbohydrate	Aminosugar Metabolism
N-acetylglucosaminylasparagine	-0.00447104	0.0245498	0.137456	-0.00180243	0.296766	0.52006	Carbohydrate	Aminosugar Metabolism
sucrose	-0.00308061	0.236582	0.459556	-0.00283718	0.30946	0.529882	Carbohydrate	Disaccharides and Oligosaccharides
mannitol/sorbitol	-0.00444128	0.137148	0.344035	-0.00532169	0.0286118	0.139625	Carbohydrate	Fructose, Mannose and Galactose Metabolism
mannose	-0.00229589	0.0890026	0.274729	0.00134871	0.191254	0.393453	Carbohydrate	Fructose, Mannose and Galactose Metabolism
galactonate	8.57473e-05	0.968005	0.987832	0.000813117	0.686662	0.814316	Carbohydrate	Fructose, Mannose and Galactose Metabolism
maltotetraose	-0.00315708	0.107536	0.302271	-0.0028646	0.121114	0.294773	Carbohydrate	Glycogen Metabolism
1,5-anhydroglucitol (1,5-AG)	0.00506195	0.0143523	0.105538	0.0036602	0.0914931	0.253686	Carbohydrate	Glycolysis, Gluconeogenesis, and Pyruvate Metabolism
2,3-diphosphoglycerate	8.56662e-05	0.894503	0.944266	-0.000502659	0.210146	0.418622	Carbohydrate	Glycolysis, Gluconeogenesis, and Pyruvate Metabolism
glucose	-0.000352776	0.723362	0.856474	0.000534074	0.502244	0.672415	Carbohydrate	Glycolysis, Gluconeogenesis, and Pyruvate Metabolism
pyruvate	0.00262439	0.0299097	0.153956	-0.00021248	0.849885	0.911826	Carbohydrate	Glycolysis, Gluconeogenesis, and Pyruvate Metabolism
glycerate	-0.000547183	0.669789	0.826594	-8.91936e-05	0.932062	0.962666	Carbohydrate	Glycolysis, Gluconeogenesis, and Pyruvate Metabolism
ribonate (ribonolactone)	-0.0040845	0.012857	0.101401	-0.00385471	0.0143233	0.100664	Carbohydrate	Pentose Metabolism
arabonate/xylonate	-0.00416685	0.036823	0.169884	-0.00392312	0.031766	0.145557	Carbohydrate	Pentose Metabolism
sedoheptulose	-0.00178371	0.374843	0.610343	-0.00263785	0.130115	0.306745	Carbohydrate	Pentose Metabolism
ribulonate/xylulonate*	-0.00430882	0.0315542	0.159072	-0.00200433	0.208486	0.416973	Carbohydrate	Pentose Metabolism
arabinose	8.25239e-05	0.96177	0.987832	-0.00113758	0.409035	0.605137	Carbohydrate	Pentose Metabolism
xylose	0.000734968	0.617606	0.791474	-0.000483867	0.730585	0.8389	Carbohydrate	Pentose Metabolism
threonate	-0.00338877	0.0406351	0.177416	-0.00253266	0.0748381	0.23116	Cofactors and Vitamins	Ascorbate and Aldarate Metabolism
oxalate (ethanedioate)	-0.00204642	0.195173	0.415102	-0.00228342	0.0766799	0.23198	Cofactors and Vitamins	Ascorbate and Aldarate Metabolism
biliverdin	-0.00126881	0.44729	0.681386	-0.00350739	0.0671118	0.215418	Cofactors and Vitamins	Hemoglobin and Porphyrin Metabolism
bilirubin	0.000490494	0.762187	0.880123	-0.00309808	0.0767722	0.23198	Cofactors and Vitamins	Hemoglobin and Porphyrin Metabolism
bilirubin (E,Z or Z,E)*	0.000262043	0.864585	0.928685	-0.00311469	0.10843	0.279529	Cofactors and Vitamins	Hemoglobin and Porphyrin Metabolism
bilirubin (E,E)*	0.000957693	0.574205	0.764044	-0.0017055	0.296797	0.52006	Cofactors and Vitamins	Hemoglobin and Porphyrin Metabolism
heme	0.00123199	0.641152	0.809092	0.00151852	0.46879	0.651519	Cofactors and Vitamins	Hemoglobin and Porphyrin Metabolism
D-urobilin	0.00016366	0.946781	0.979843	-0.00150282	0.525466	0.686552	Cofactors and Vitamins	Hemoglobin and Porphyrin Metabolism
L-urobilin	-0.00350411	0.251916	0.478396	0.00143614	0.632737	0.768566	Cofactors and Vitamins	Hemoglobin and Porphyrin Metabolism
I-urobilinogen	0.00152722	0.565011	0.757999	-3.9248e-05	0.986149	0.98716	Cofactors and Vitamins	Hemoglobin and Porphyrin Metabolism
quinolinate	-0.00514951	0.0655781	0.236662	-0.00592554	0.0339981	0.15088	Cofactors and Vitamins	Nicotinate and Nicotinamide Metabolism
1-methylnicotinamide	-0.00176764	0.385607	0.617224	-0.00356732	0.0581593	0.202765	Cofactors and Vitamins	Nicotinate and Nicotinamide Metabolism
N1-Methyl-2-pyridone-5-carboxamide	-0.00389279	0.0585517	0.218563	-0.0019159	0.273288	0.493029	Cofactors and Vitamins	Nicotinate and Nicotinamide Metabolism
nicotinamide	0.000429733	0.822188	0.913638	0.0013223	0.389557	0.593148	Cofactors and Vitamins	Nicotinate and Nicotinamide Metabolism
trigonelline (N'-methylnicotinate)	0.00320323	0.331117	0.567615	-0.00141576	0.630879	0.768566	Cofactors and Vitamins	Nicotinate and Nicotinamide Metabolism
pantothenate (Vitamin B5)	-0.00147891	0.404799	0.634445	-0.00178442	0.22809	0.441697	Cofactors and Vitamins	Pantothenate and CoA Metabolism
riboflavin (Vitamin B2)	0.000720127	0.682156	0.835765	0.000844637	0.615755	0.763472	Cofactors and Vitamins	Riboflavin Metabolism
thiamin (Vitamin B1)	-0.00410827	0.152938	0.364317	0.00237824	0.203813	0.410995	Cofactors and Vitamins	Thiamine Metabolism
gamma-CEHC	-0.000619501	0.775981	0.888624	0.00354952	0.0358847	0.153612	Cofactors and Vitamins	Tocopherol Metabolism
alpha-CEHC sulfate	-0.00600052	0.0605373	0.225116	-0.00517842	0.0764928	0.23198	Cofactors and Vitamins	Tocopherol Metabolism
alpha-CEHC glucuronide*	-0.00483906	0.0821275	0.264227	-0.0023993	0.308735	0.529882	Cofactors and Vitamins	Tocopherol Metabolism
gamma-CEHC sulfate*	-0.00201195	0.226903	0.44768	-0.000967107	0.634964	0.769845	Cofactors and Vitamins	Tocopherol Metabolism
gamma-tocopherol/beta-tocopherol	-0.000421576	0.812979	0.906941	0.000371216	0.773649	0.869909	Cofactors and Vitamins	Tocopherol Metabolism
carotene diol (3)	0.00515623	0.0202658	0.127051	0.00413445	0.0312394	0.145189	Cofactors and Vitamins	Vitamin A Metabolism
beta-cryptoxanthin	0.00224747	0.366988	0.601197	0.00251679	0.245782	0.464124	Cofactors and Vitamins	Vitamin A Metabolism
retinol (Vitamin A)	0.00027622	0.868642	0.928685	0.00153805	0.319992	0.534139	Cofactors and Vitamins	Vitamin A Metabolism
pyridoxal	-0.000761215	0.655032	0.818162	0.00208234	0.105724	0.276839	Cofactors and Vitamins	Vitamin B6 Metabolism
pyridoxine (Vitamin B6)	-0.000423586	0.302746	0.54123	0.000390403	0.187154	0.387739	Cofactors and Vitamins	Vitamin B6 Metabolism
phosphate	-0.000355566	0.67923	0.833484	-0.00170436	0.0429099	0.170939	Energy	Oxidative Phosphorylation
succinate	-0.00142217	0.412955	0.643106	-0.00261195	0.0606166	0.206568	Energy	TCA Cycle
aconitate [cis or trans]	-0.00118672	0.46604	0.691813	-0.00255627	0.0844212	0.242818	Energy	TCA Cycle
2-methylcitrate/homocitrate	-0.00580856	0.0188968	0.123207	-0.00289324	0.178733	0.378639	Energy	TCA Cycle
citrate	-0.000213744	0.891143	0.943448	-0.00137968	0.31423	0.533372	Energy	TCA Cycle
fumarate	-0.00139951	0.510246	0.726001	-0.00035553	0.850166	0.911826	Energy	TCA Cycle
malate	-0.00210541	0.330949	0.567615	4.82472e-05	0.978493	0.985294	Energy	TCA Cycle
5alpha-androstan-3beta,17alpha-diol disulfate	-0.00365293	0.0945664	0.278709	0.00599599	0.0175501	0.108411	Lipid	Androgenic Steroids
androstenediol (3alpha, 17alpha) monosulfate (3)	0.00311226	0.193681	0.414501	0.00517505	0.0217204	0.123136	Lipid	Androgenic Steroids
epiandrosterone sulfate	0.00378417	0.18738	0.410085	0.00522243	0.0427527	0.170939	Lipid	Androgenic Steroids
dehydroisoandrosterone sulfate (DHEA-S)	0.005257	0.0238597	0.136711	0.00360158	0.0791586	0.235545	Lipid	Androgenic Steroids
androstenediol (3beta,17beta) monosulfate (1)	0.00362279	0.132594	0.338029	0.00391435	0.0922197	0.254255	Lipid	Androgenic Steroids
5alpha-androstan-3beta,17beta-diol monosulfate (2)	0.000755649	0.70197	0.848611	0.00318878	0.104045	0.273715	Lipid	Androgenic Steroids
5alpha-androstan-3alpha,17beta-diol disulfate	-0.00519366	0.0356645	0.16932	-0.00383486	0.152785	0.341232	Lipid	Androgenic Steroids
5alpha-androstan-3alpha,17beta-diol monosulfate (1)	-8.47584e-05	0.973965	0.990164	0.00329812	0.164207	0.359341	Lipid	Androgenic Steroids
andro steroid monosulfate C19H28O6S (1)*	-0.00202741	0.403056	0.634445	-0.00291016	0.178156	0.378639	Lipid	Androgenic Steroids
androsterone sulfate	0.00463559	0.133069	0.338029	0.00309239	0.194694	0.398883	Lipid	Androgenic Steroids
androstenediol (3beta,17beta) disulfate (1)	0.000798603	0.727028	0.857899	-0.00230762	0.221239	0.432723	Lipid	Androgenic Steroids
androstenediol (3beta,17beta) disulfate (2)	5.24666e-05	0.979529	0.993754	-0.00164534	0.332214	0.546436	Lipid	Androgenic Steroids
5alpha-androstan-3alpha,17beta-diol monosulfate (2)	0.000573488	0.114596	0.31373	0.00164263	0.338135	0.550952	Lipid	Androgenic Steroids
16a-hydroxy DHEA 3-sulfate	-3.26662e-05	0.988952	0.995922	-0.00174235	0.373559	0.576889	Lipid	Androgenic Steroids
androstenediol (3beta,17beta) monosulfate (2)	0.00457849	0.0618279	0.227151	0.00110561	0.549672	0.712462	Lipid	Androgenic Steroids
etiocholanolone glucuronide	-0.00281986	0.3393	0.576655	-0.000428477	0.845376	0.910692	Lipid	Androgenic Steroids
5alpha-androstan-3beta,17beta-diol disulfate	-0.000245653	0.914998	0.960159	-0.000290046	0.888783	0.932745	Lipid	Androgenic Steroids
11-ketoetiocholanolone glucuronide	-0.00363567	0.154041	0.364776	0.000273235	0.894718	0.936958	Lipid	Androgenic Steroids
androsterone glucuronide	-0.00521334	0.0639915	0.231792	4.67367e-05	0.98494	0.98716	Lipid	Androgenic Steroids
methylmalonate (MMA)	-0.00199943	0.296016	0.535126	-0.00425491	0.0197359	0.116038	Lipid	BCAA Metabolism
propionylglycine (C3)	-0.00213587	0.264051	0.495999	0.000112451	0.941481	0.967102	Lipid	BCAA Metabolism
carnitine	-0.00188252	0.243673	0.465454	-0.0029662	0.0179021	0.109101	Lipid	Carnitine Metabolism
deoxycarnitine	-0.0025334	0.107743	0.302271	-0.00325506	0.0239224	0.128996	Lipid	Carnitine Metabolism
N-palmitoyl-sphingadienine (d18:2/16:0)*	-0.00083635	0.531879	0.737385	-0.00294523	0.0257456	0.132684	Lipid	Ceramides
ceramide (d16:1/24:1, d18:1/22:1)*	-0.00103748	0.504986	0.723099	-0.00292847	0.0353865	0.152147	Lipid	Ceramides
N-palmitoyl-heptadecasphingosine (d17:1/16:0)*	0.000321676	0.836786	0.918492	-0.00309726	0.0394598	0.165886	Lipid	Ceramides
ceramide (d18:1/20:0, d16:1/22:0, d20:1/18:0)*	-0.000518089	0.728152	0.857991	-0.00273369	0.0544069	0.193095	Lipid	Ceramides
ceramide (d18:2/24:1, d18:1/24:2)*	-0.0010246	0.489206	0.71197	-0.00217823	0.107019	0.277794	Lipid	Ceramides
ceramide (d18:1/14:0, d16:1/16:0)*	-0.000895651	0.568225	0.759948	-0.00208631	0.137123	0.317516	Lipid	Ceramides
N-behenoyl-sphingadienine (d18:2/22:0)*	-0.000243551	0.87548	0.931686	-0.00108102	0.447337	0.638305	Lipid	Ceramides
cortisone	0.00423708	0.0184173	0.123207	0.00203747	0.161456	0.356033	Lipid	Corticosteroids
cortisol	-0.00039931	0.813134	0.906941	0.000199255	0.880253	0.924787	Lipid	Corticosteroids
stearoyl-arachidonoyl-glycerol (18:0/20:4) [1]*	0.00145555	0.384003	0.616977	-0.00303767	0.0448662	0.174589	Lipid	Diacylglycerol
palmitoyl-linoleoyl-glycerol (16:0/18:2) [1]*	0.00174737	0.348969	0.585406	0.0023123	0.143043	0.325623	Lipid	Diacylglycerol
oleoyl-oleoyl-glycerol (18:1/18:1) [2]*	0.00134526	0.4263	0.658643	-0.00209674	0.158481	0.352341	Lipid	Diacylglycerol
diacylglycerol (14:0/18:1, 16:0/16:1) [2]*	0.00141638	0.479656	0.702383	-0.00216834	0.207767	0.416387	Lipid	Diacylglycerol
oleoyl-oleoyl-glycerol (18:1/18:1) [1]*	0.00127138	0.430141	0.662484	-0.00168416	0.238373	0.455237	Lipid	Diacylglycerol
linoleoyl-arachidonoyl-glycerol (18:2/20:4) [1]*	0.00219748	0.239641	0.461357	0.00182145	0.260809	0.475793	Lipid	Diacylglycerol
palmitoyl-linoleoyl-glycerol (16:0/18:2) [2]*	0.0012591	0.457799	0.687178	0.00152435	0.293577	0.52006	Lipid	Diacylglycerol
palmitoyl-arachidonoyl-glycerol (16:0/20:4) [2]*	0.00308034	0.106304	0.302271	0.00175634	0.299396	0.521804	Lipid	Diacylglycerol
diacylglycerol (14:0/18:1, 16:0/16:1) [1]*	0.00194051	0.329726	0.567615	-0.00155682	0.367568	0.572401	Lipid	Diacylglycerol
linoleoyl-linoleoyl-glycerol (18:2/18:2) [1]*	-0.000551729	0.762233	0.880123	0.00129885	0.419764	0.612391	Lipid	Diacylglycerol
oleoyl-linoleoyl-glycerol (18:1/18:2) [1]	0.00118618	0.447251	0.681386	0.00109982	0.434477	0.628972	Lipid	Diacylglycerol
palmitoleoyl-arachidonoyl-glycerol (16:1/20:4) [2]*	0.00335472	0.10814	0.302271	0.00125658	0.474296	0.654756	Lipid	Diacylglycerol
palmitoyl-oleoyl-glycerol (16:0/18:1) [2]*	0.00226469	0.189569	0.410631	-0.00104973	0.488871	0.664379	Lipid	Diacylglycerol
oleoyl-linoleoyl-glycerol (18:1/18:2) [2]	0.00108707	0.498852	0.71674	0.000976201	0.493761	0.66602	Lipid	Diacylglycerol
palmitoyl-oleoyl-glycerol (16:0/18:1) [1]*	0.00208205	0.231238	0.451398	-0.00101099	0.497065	0.668231	Lipid	Diacylglycerol
linoleoyl-linolenoyl-glycerol (18:2/18:3) [2]*	-0.00116346	0.540462	0.744061	0.000960207	0.551699	0.713189	Lipid	Diacylglycerol
oleoyl-linolenoyl-glycerol (18:1/18:3) [2]*	-0.00233624	0.191808	0.412282	0.00089182	0.570971	0.728607	Lipid	Diacylglycerol
linoleoyl-arachidonoyl-glycerol (18:2/20:4) [2]*	0.00221542	0.219674	0.440545	0.000797918	0.622435	0.766073	Lipid	Diacylglycerol
palmitoleoyl-linoleoyl-glycerol (16:1/18:2) [1]*	0.00127741	0.46562	0.691813	0.000725463	0.627337	0.768566	Lipid	Diacylglycerol
diacylglycerol (16:1/18:2 [2], 16:0/18:3 [1])*	-0.000502735	0.776446	0.888624	-0.000672501	0.662374	0.792251	Lipid	Diacylglycerol
oleoyl-arachidonoyl-glycerol (18:1/20:4) [1]*	0.00267725	0.125903	0.331444	-0.000587601	0.706038	0.825261	Lipid	Diacylglycerol
palmitoyl-palmitoyl-glycerol (16:0/16:0) [2]*	0.0021453	0.310428	0.549003	-0.000456643	0.799597	0.884815	Lipid	Diacylglycerol
oleoyl-arachidonoyl-glycerol (18:1/20:4) [2]*	0.00289488	0.106958	0.302271	-0.000163114	0.91846	0.95465	Lipid	Diacylglycerol
palmitoyl-arachidonoyl-glycerol (16:0/20:4) [1]*	0.00396671	0.0542021	0.209524	-0.000141744	0.93209	0.962666	Lipid	Diacylglycerol
stearoyl-arachidonoyl-glycerol (18:0/20:4) [2]*	0.00359681	0.0246816	0.137456	2.70583e-05	0.98562	0.98716	Lipid	Diacylglycerol
N-palmitoyl-sphinganine (d18:0/16:0)	-0.000733183	0.667367	0.826183	-0.00330689	0.0450782	0.174589	Lipid	Dihydroceramides
N-stearoyl-sphinganine (d18:0/18:0)*	0.000952351	0.625975	0.795069	-0.00313137	0.0782237	0.234191	Lipid	Dihydroceramides
palmitoyl dihydrosphingomyelin (d18:0/16:0)*	0.00302097	0.0187164	0.123207	0.00249732	0.0228301	0.126637	Lipid	Dihydrosphingomyelins
myristoyl dihydrosphingomyelin (d18:0/14:0)*	0.00210296	0.179128	0.400886	0.00239004	0.055958	0.19788	Lipid	Dihydrosphingomyelins
sphingomyelin (d18:0/18:0, d19:0/17:0)*	0.00367112	0.0484456	0.19418	0.000897691	0.569695	0.728607	Lipid	Dihydrosphingomyelins
leukotriene B4	-0.000662561	0.727197	0.857899	0.000476261	0.760745	0.85936	Lipid	Eicosanoid
N-oleoylserine	0.0021212	0.152452	0.364317	-0.00178229	0.131358	0.307447	Lipid	Endocannabinoid
N-oleoyltaurine	0.00109505	0.553247	0.749412	-0.00158004	0.320702	0.534139	Lipid	Endocannabinoid
N-stearoyltaurine	0.00126778	0.382278	0.616944	0.0011188	0.444326	0.635868	Lipid	Endocannabinoid
linoleoyl ethanolamide	0.00011063	0.948352	0.980432	0.000130501	0.929019	0.96153	Lipid	Endocannabinoid
N-palmitoylserine	0.000903952	0.571721	0.762814	-4.30766e-05	0.976226	0.985294	Lipid	Endocannabinoid
estrone 3-sulfate	-0.00255085	0.106463	0.302271	-0.0036264	0.0533719	0.191042	Lipid	Estrogenic Steroids
arachidonoylcholine	0.000917647	0.637497	0.805519	0.00370839	0.0461113	0.177884	Lipid	Fatty Acid Metabolism (Acyl Choline)
dihomo-linolenoyl-choline	-0.000328393	0.870057	0.928947	0.00351126	0.062474	0.207397	Lipid	Fatty Acid Metabolism (Acyl Choline)
docosahexaenoylcholine	0.000600554	0.75292	0.875571	0.00304217	0.0979068	0.265436	Lipid	Fatty Acid Metabolism (Acyl Choline)
stearoylcholine*	-0.00127653	0.531824	0.737385	0.00272319	0.166712	0.361589	Lipid	Fatty Acid Metabolism (Acyl Choline)
linoleoylcholine*	-0.00101723	0.618878	0.791474	0.00216477	0.236488	0.454809	Lipid	Fatty Acid Metabolism (Acyl Choline)
palmitoylcholine	-0.000733695	0.71035	0.85013	0.00190193	0.290399	0.51675	Lipid	Fatty Acid Metabolism (Acyl Choline)
oleoylcholine	-0.00172053	0.396342	0.628237	0.000488299	0.789821	0.877979	Lipid	Fatty Acid Metabolism (Acyl Choline)
hexanoylglutamine	-0.00502509	0.0255896	0.140599	-0.00399747	0.0607439	0.206568	Lipid	Fatty Acid Metabolism (Acyl Glutamine)
N-palmitoylglycine	0.0007028	0.61718	0.791474	-0.0026571	0.0230957	0.126637	Lipid	Fatty Acid Metabolism(Acyl Glycine)
hexanoylglycine (C6)	-0.00305506	0.159059	0.372153	0.00124142	0.45957	0.648179	Lipid	Fatty Acid Metabolism(Acyl Glycine)
trans-2-hexenoylglycine	-0.00204543	0.403998	0.634445	-0.00139445	0.478558	0.657256	Lipid	Fatty Acid Metabolism(Acyl Glycine)
stearamide (18:0)	-0.000262843	0.891356	0.943448	0.00113978	0.518153	0.682285	Lipid	Fatty Acid, Amide
2-aminooctanoate	0.00428887	0.0267371	0.144469	0.00127474	0.471346	0.653457	Lipid	Fatty Acid, Amino
N-acetyl-2-aminooctanoate*	0.000968064	0.642867	0.810211	-0.00034264	0.863144	0.919682	Lipid	Fatty Acid, Amino
15-methylpalmitate (i17:0)	0.00286351	0.098934	0.287968	-0.0025933	0.0593422	0.204351	Lipid	Fatty Acid, Branched
17-methylstearate (i19:0)	0.00133484	0.373004	0.609011	-0.00231539	0.065311	0.212479	Lipid	Fatty Acid, Branched
2-hydroxyphytanate*	0.0030568	0.168423	0.384854	-0.00261431	0.176527	0.377004	Lipid	Fatty Acid, Branched
pristanate	0.000501167	0.794859	0.898207	-0.00133731	0.422656	0.61569	Lipid	Fatty Acid, Branched
glutarate (C5-DC)	-0.00121938	0.619622	0.791474	-0.00367359	0.0485792	0.181375	Lipid	Fatty Acid, Dicarboxylate
eicosanodioate (C20-DC)	-0.00197148	0.184109	0.40867	-0.00279313	0.0680312	0.216282	Lipid	Fatty Acid, Dicarboxylate
hexadecenedioate (C16:1-DC)*	-0.00254444	0.184999	0.409342	-0.00348157	0.0987433	0.266963	Lipid	Fatty Acid, Dicarboxylate
tetradecanedioate (C14)	0.00019435	0.917182	0.961419	-0.00321597	0.106757	0.277794	Lipid	Fatty Acid, Dicarboxylate
2-hydroxyglutarate	-0.00161593	0.293588	0.534514	-0.0019966	0.114882	0.287055	Lipid	Fatty Acid, Dicarboxylate
hexadecanedioate (C16)	2.87144e-05	0.988108	0.995922	-0.00272989	0.167087	0.361589	Lipid	Fatty Acid, Dicarboxylate
maleate	-0.00448475	0.153167	0.364317	0.0030923	0.217959	0.429753	Lipid	Fatty Acid, Dicarboxylate
octadecenedioate (C18:1-DC)*	-0.00122198	0.512378	0.72624	-0.00220071	0.255979	0.4705	Lipid	Fatty Acid, Dicarboxylate
octadecanedioate (C18)	0.000407513	0.81792	0.91004	-0.00164105	0.368894	0.572401	Lipid	Fatty Acid, Dicarboxylate
hydroxy-CMPF*	0.00184849	0.379845	0.615047	0.00193661	0.40828	0.605137	Lipid	Fatty Acid, Dicarboxylate
3-carboxy-4-methyl-5-pentyl-2-furanpropionate (3-CMPFP)	-0.00224052	0.259955	0.491752	-0.00128046	0.466425	0.651519	Lipid	Fatty Acid, Dicarboxylate
4-hydroxy-2-oxoglutaric acid	0.000715007	0.710782	0.85013	-0.00122055	0.477249	0.656975	Lipid	Fatty Acid, Dicarboxylate
docosadioate (C22-DC)	-0.00144848	0.265497	0.497426	-0.000907513	0.521542	0.682513	Lipid	Fatty Acid, Dicarboxylate
azelate (nonanedioate; C9)	-0.000471832	0.757063	0.877411	0.000506937	0.715073	0.830847	Lipid	Fatty Acid, Dicarboxylate
sebacate (C10-DC)	-0.00114612	0.497371	0.716389	-0.000594862	0.744804	0.849216	Lipid	Fatty Acid, Dicarboxylate
dodecanedioate (C12)	0.00318741	0.0935137	0.278709	-0.00043715	0.812543	0.889449	Lipid	Fatty Acid, Dicarboxylate
dodecenedioate (C12:1-DC)*	0.001119	0.555922	0.751994	-0.000425773	0.810645	0.889449	Lipid	Fatty Acid, Dicarboxylate
dodecadienoate (12:2)*	0.00339828	0.033874	0.162435	-0.000307664	0.815012	0.889874	Lipid	Fatty Acid, Dicarboxylate
3-carboxy-4-methyl-5-propyl-2-furanpropanoate (CMPF)	0.000406092	0.858798	0.927047	-0.000157883	0.947278	0.970501	Lipid	Fatty Acid, Dicarboxylate
octadecadienedioate (C18:2-DC)*	-0.00291034	0.0943169	0.278709	0.000116964	0.950746	0.970636	Lipid	Fatty Acid, Dicarboxylate
9,10-DiHOME	-0.00274429	0.137192	0.344035	-0.00178168	0.326605	0.541106	Lipid	Fatty Acid, Dihydroxy
12,13-DiHOME	0.00182971	0.325205	0.564535	0.000598603	0.731313	0.8389	Lipid	Fatty Acid, Dihydroxy
5-hydroxyhexanoate	-0.0037597	0.0200279	0.126835	-0.00289018	0.0518232	0.190148	Lipid	Fatty Acid, Monohydroxy
2-hydroxybehenate	-0.00218918	0.0733963	0.253649	-0.00231898	0.0632642	0.209308	Lipid	Fatty Acid, Monohydroxy
3-hydroxylaurate	0.00384386	0.0368433	0.169884	-0.00260833	0.0856152	0.244823	Lipid	Fatty Acid, Monohydroxy
3-hydroxyoleate*	0.00497034	0.0126847	0.101401	-0.00239012	0.129253	0.30613	Lipid	Fatty Acid, Monohydroxy
2-hydroxyoctanoate	-0.00092646	0.605592	0.781358	-0.00218011	0.144776	0.327846	Lipid	Fatty Acid, Monohydroxy
3-hydroxydecanoate	0.00382981	0.0469819	0.189242	-0.00201324	0.191486	0.393453	Lipid	Fatty Acid, Monohydroxy
16-hydroxypalmitate	0.00189257	0.185858	0.410085	-0.00144956	0.228085	0.441697	Lipid	Fatty Acid, Monohydroxy
2-hydroxyarachidate*	0.0025103	0.0456353	0.187677	-0.0013589	0.249219	0.464195	Lipid	Fatty Acid, Monohydroxy
3-hydroxymyristate	0.00333581	0.0188406	0.123207	-0.00103168	0.360239	0.568921	Lipid	Fatty Acid, Monohydroxy
2-hydroxypalmitate	0.00161423	0.202904	0.421317	-0.00111836	0.363425	0.57118	Lipid	Fatty Acid, Monohydroxy
2-hydroxylaurate	0.00233109	0.128104	0.331444	0.00113445	0.412214	0.605905	Lipid	Fatty Acid, Monohydroxy
3-hydroxyhexanoate	0.00159785	0.32333	0.563555	-0.00125187	0.442323	0.634469	Lipid	Fatty Acid, Monohydroxy
2-hydroxystearate	0.00224073	0.0639577	0.231792	0.000668679	0.565305	0.725017	Lipid	Fatty Acid, Monohydroxy
5-hydroxyvalproate	-0.00019874	0.866252	0.928685	0.000340055	0.722774	0.836807	Lipid	Fatty Acid, Monohydroxy
3-hydroxystearate	0.00207062	0.152084	0.364317	-0.00041139	0.737853	0.844249	Lipid	Fatty Acid, Monohydroxy
3-hydroxyoctanoate	0.00418001	0.0262333	0.142534	-0.000271705	0.873221	0.921366	Lipid	Fatty Acid, Monohydroxy
13-HODE + 9-HODE	-0.000105039	0.95176	0.981879	0.000175652	0.894174	0.936958	Lipid	Fatty Acid, Monohydroxy
glycerol	-0.00200421	0.284429	0.522879	-0.0030703	0.0281386	0.138981	Lipid	Glycerolipid Metabolism
glycerol 3-phosphate	-0.00113274	0.683251	0.835765	-0.00195438	0.274976	0.495161	Lipid	Glycerolipid Metabolism
glycerophosphoglycerol	-0.00343621	0.082052	0.264227	-0.000984016	0.505564	0.675008	Lipid	Glycerolipid Metabolism
glycosyl ceramide (d18:1/20:0, d16:1/22:0)*	0.00409245	0.0130639	0.101401	0.00304266	0.029232	0.139855	Lipid	Hexosylceramides
glycosyl ceramide (d18:2/24:1, d18:1/24:2)*	0.00199165	0.222572	0.443883	0.00284912	0.0486887	0.181375	Lipid	Hexosylceramides
glycosyl-N-behenoyl-sphingadienine (d18:2/22:0)*	0.00255433	0.153475	0.364317	0.00266852	0.0698449	0.219373	Lipid	Hexosylceramides
glycosyl ceramide (d18:1/23:1, d17:1/24:1)*	0.00283143	0.139405	0.347801	0.00286963	0.0914238	0.253686	Lipid	Hexosylceramides
glycosyl-N-palmitoyl-sphingosine (d18:1/16:0)	0.00225909	0.071289	0.248116	0.00194619	0.1058	0.276839	Lipid	Hexosylceramides
glycosyl-N-(2-hydroxynervonoyl)-sphingosine (d18:1/24:1(2OH))*	0.0017338	0.330235	0.567615	0.00154659	0.311843	0.530242	Lipid	Hexosylceramides
glycosyl-N-stearoyl-sphingosine (d18:1/18:0)	0.00329629	0.0413175	0.17749	0.000246754	0.846677	0.911088	Lipid	Hexosylceramides
myo-inositol	-0.00094623	0.59937	0.775375	-0.00315675	0.100243	0.269524	Lipid	Inositol Metabolism
acetoacetate	-0.00148533	0.582819	0.767038	-0.000602642	0.780214	0.874585	Lipid	Ketone Bodies
3-hydroxybutyrate (BHBA)	0.00102747	0.705746	0.849621	-0.000659522	0.781833	0.874585	Lipid	Ketone Bodies
palmitoleate (16:1n7)	-0.000525781	0.806774	0.904845	-0.00401905	0.0166664	0.106143	Lipid	Long Chain Fatty Acid
stearate (18:0)	-0.000120889	0.926635	0.966151	-0.00245594	0.0176829	0.108544	Lipid	Long Chain Fatty Acid
nonadecanoate (19:0)	0.000766422	0.51346	0.726721	-0.0025012	0.0209891	0.121215	Lipid	Long Chain Fatty Acid
10-heptadecenoate (17:1n7)	1.21002e-05	0.994904	0.995922	-0.00336435	0.0236231	0.128805	Lipid	Long Chain Fatty Acid
10-nonadecenoate (19:1n9)	0.000234875	0.895025	0.944266	-0.00300677	0.0339235	0.15088	Lipid	Long Chain Fatty Acid
palmitate (16:0)	0.000290468	0.85442	0.924362	-0.00245528	0.0482318	0.181375	Lipid	Long Chain Fatty Acid
margarate (17:0)	0.000267129	0.867934	0.928685	-0.00252153	0.0485467	0.181375	Lipid	Long Chain Fatty Acid
myristate (14:0)	0.00131186	0.478517	0.702383	-0.00251577	0.0689871	0.217933	Lipid	Long Chain Fatty Acid
myristoleate (14:1n5)	0.0019767	0.340215	0.576655	-0.00272581	0.0869748	0.247165	Lipid	Long Chain Fatty Acid
pentadecanoate (15:0)	0.0014023	0.329014	0.567615	-0.00176171	0.120091	0.293023	Lipid	Long Chain Fatty Acid
acetylcarnitine (C2)	-0.000400646	0.825079	0.913638	-0.00225511	0.14632	0.329812	Lipid	Short-chain Acylcarnitine
3-hydroxybutyrylcarnitine (C3-DC)	0.000831864	0.714715	0.85347	-0.00394134	0.0379796	0.161166	Lipid	Short-chain Acylcarnitine
propionylcarnitine (C3)	-0.00134463	0.52169	0.729919	-0.00118713	0.489927	0.664379	Lipid	Short-chain Acylcarnitine
succinylcarnitine (C4-DC)	-0.00370267	0.0361148	0.169884	-0.00390522	0.0288393	0.139741	Energy	Short-chain Acylcarnitine
isobutyrylcarnitine (C4)	-0.00402132	0.0809191	0.263381	-0.00224636	0.311607	0.530242	Amino Acid	Short-chain Acylcarnitine
2-methylmalonylcarnitine (C4-DC)	-0.00559668	0.0192472	0.12384	-0.00528362	0.0165646	0.106143	Lipid	Short-chain Acylcarnitine
butyrylcarnitine (C4)	0.000763411	0.757193	0.877411	-0.00150406	0.409212	0.605137	Lipid	Short-chain Acylcarnitine
3-hydroxybutyrylcarnitine (C4-OH)	0.00184378	0.471731	0.697961	-0.00134232	0.559033	0.718862	Lipid	Short-chain Acylcarnitine
glutaroylcarnitine (C5)	-0.00283598	0.142293	0.349654	-0.00385535	0.0400283	0.165886	Amino Acid	Short-chain Acylcarnitine
2-methylbutyroylcarnitine (C5)	-0.00409189	0.044121	0.185316	-0.00384588	0.0647134	0.211238	Amino Acid	Short-chain Acylcarnitine
tiglyl carnitine (C5)	-0.00425521	0.0319083	0.160032	-0.00254137	0.196638	0.400665	Amino Acid	Short-chain Acylcarnitine
isovalerylcarnitine (C5)	-0.00172626	0.384191	0.616977	-0.00146643	0.436337	0.629978	Amino Acid	Short-chain Acylcarnitine
3-methylglutarylcarnitine (C6-DC)	-0.00285509	0.290921	0.530822	-0.00565536	0.0152599	0.102715	Amino Acid	Short-chain Acylcarnitine
adipoylcarnitine (C6-DC)	-0.00392964	0.107644	0.302271	-0.00499111	0.0237805	0.128943	Lipid	Short-chain Acylcarnitine
hexanoylcarnitine (C6)	-0.00302723	0.151697	0.364317	-0.00312636	0.0912924	0.253686	Lipid	Short-chain Acylcarnitine
octanoylcarnitine (C8)	-0.00335554	0.0790138	0.263381	-0.00363705	0.0720798	0.22548	Lipid	Medium-chain Acylcarnitine
decanoylcarnitine (C10)	-0.00255029	0.159752	0.372883	-0.00391736	0.0489504	0.181656	Lipid	Medium-chain Acylcarnitine
cis-4-decenoylcarnitine (C10:1)	-0.00380306	0.0326826	0.161432	-0.0024758	0.17824	0.378639	Lipid	Medium-chain Acylcarnitine
laurylcarnitine (C12)	0.00104773	0.529973	0.737385	-0.00279864	0.103019	0.273225	Lipid	Medium-chain Acylcarnitine
5-dodecenoylcarnitine (C12:1)	-0.00178192	0.356627	0.591154	-0.00288872	0.12277	0.295132	Lipid	Medium-chain Acylcarnitine
myristoylcarnitine (C14)	0.00287781	0.0860454	0.268857	-0.00279994	0.067539	0.215418	Lipid	Medium-chain Acylcarnitine
myristoleoylcarnitine (C14:1)*	0.00079971	0.65847	0.820361	-0.00151727	0.368663	0.572401	Lipid	Medium-chain Acylcarnitine
palmitoleoylcarnitine (C16:1)*	0.00246775	0.152731	0.364317	-0.00296094	0.0528943	0.191042	Lipid	Long-chain Acylcarnitine
oleoylcarnitine (C18)	0.00375233	0.0201017	0.126835	-0.00190421	0.182206	0.380522	Lipid	Long-chain Acylcarnitine
linolenoylcarnitine (C18:3)*	0.0024982	0.154913	0.365073	0.000329239	0.830488	0.898424	Lipid	Long-chain Acylcarnitine
3-hydroxyoleoylcarnitine (C18:1-OH)	0.00206325	0.283119	0.521451	-0.00282894	0.0845156	0.242818	Lipid	Long-chain Acylcarnitine
dihomo-linoleoylcarnitine (C20:2)*	0.00417082	0.0164866	0.11684	0.000775447	0.587966	0.743527	Lipid	Long-chain Acylcarnitine
eicosenoylcarnitine (C20:1)*	0.0040484	0.0211547	0.130122	-0.000736035	0.601226	0.754238	Lipid	Long-chain Acylcarnitine
docosahexaenoylcarnitine (C22:6)*	7.62848e-05	0.969651	0.987832	-0.00133037	0.461813	0.650404	Lipid	Long-chain Acylcarnitine
docosapentaenoylcarnitine (C22:5n3)*	0.0031515	0.0900217	0.275129	-0.000864368	0.611795	0.761623	Lipid	Long-chain Acylcarnitine
behenoylcarnitine (C22)*	0.00270994	0.107892	0.302271	-0.000585303	0.697024	0.821613	Lipid	Long-chain Acylcarnitine
nervonoylcarnitine (C24:1)*	0.00172029	0.337564	0.575152	-0.00227165	0.147714	0.33143	Lipid	Long-chain Acylcarnitine
ximenoylcarnitine (C26:1)*	0.00404314	0.0187469	0.123207	-0.000177296	0.908434	0.947256	Lipid	Long-chain Acylcarnitine
1-arachidonoyl-GPC* (20:4)*	0.00296355	0.0506609	0.19984	0.00371717	0.0139629	0.100205	Lipid	Lysophosphatidylcholine
1-linoleoyl-GPC (18:2)	0.00123884	0.319429	0.560864	0.00246704	0.0265128	0.134773	Lipid	Lysophosphatidylcholine
1-palmitoleoyl-GPC* (16:1)*	0.00120762	0.458119	0.687178	0.00144675	0.293814	0.52006	Lipid	Lysophosphatidylcholine
1-oleoyl-GPC (18:1)	0.000620612	0.585641	0.767038	0.000722472	0.474274	0.654756	Lipid	Lysophosphatidylcholine
1-linolenoyl-GPC (18:3)*	-0.000290215	0.865041	0.928685	0.000382516	0.786516	0.876374	Lipid	Lysophosphatidylcholine
1-oleoyl-GPI (18:1)*	-0.00105821	0.49908	0.71674	-0.00170552	0.22252	0.43436	Lipid	Lysophospholipid
1-palmitoyl-GPG (16:0)*	-0.00180324	0.264229	0.495999	0.00156008	0.26242	0.477839	Lipid	Lysophospholipid
1-palmitoyl-GPA (16:0)	-2.37216e-05	0.988986	0.995922	0.00163934	0.276929	0.496843	Lipid	Lysophospholipid
1-linoleoyl-GPA (18:2)*	0.000271369	0.884455	0.939193	0.00158958	0.300009	0.521941	Lipid	Lysophospholipid
1-linoleoyl-GPE (18:2)*	0.000478707	0.771826	0.88701	0.00120226	0.327103	0.541106	Lipid	Lysophospholipid
1-linoleoyl-GPG (18:2)*	-0.00236082	0.143697	0.352219	0.00124825	0.332879	0.546436	Lipid	Lysophospholipid
1-linoleoyl-GPI* (18:2)*	-0.00106979	0.489081	0.71197	0.00107973	0.411256	0.605842	Lipid	Lysophospholipid
1-oleoyl-GPG (18:1)*	-0.00153681	0.403713	0.634445	0.00127808	0.434996	0.628972	Lipid	Lysophospholipid
1-palmitoyl-GPE (16:0)	0.00109661	0.460499	0.688579	0.000705221	0.513109	0.681353	Lipid	Lysophospholipid
1-stearoyl-GPE (18:0)	0.000960843	0.519602	0.729083	0.000659845	0.575346	0.732122	Lipid	Lysophospholipid
1-palmitoyl-GPI* (16:0)	-0.000647572	0.69626	0.846943	0.000736836	0.613648	0.762469	Lipid	Lysophospholipid
1-arachidonoyl-GPI* (20:4)*	-0.00117573	0.417954	0.649855	-0.000558199	0.631907	0.768566	Lipid	Lysophospholipid
1-stearoyl-GPI (18:0)	-0.000354516	0.795763	0.898207	-0.000493839	0.700676	0.821947	Lipid	Lysophospholipid
1-arachidonoyl-GPE (20:4n6)*	0.00130852	0.410361	0.641108	0.000448225	0.727991	0.8389	Lipid	Lysophospholipid
2-stearoyl-GPE (18:0)*	0.00079917	0.61373	0.78945	0.000380998	0.749143	0.851693	Lipid	Lysophospholipid
1-oleoyl-GPE (18:1)	-0.0015723	0.321682	0.562247	0.000124896	0.915321	0.952402	Lipid	Lysophospholipid
caprate (10:0)	-0.00405098	0.187127	0.410085	-0.00467575	0.0731565	0.228117	Lipid	Medium Chain Fatty Acid
laurate (12:0)	0.00332032	0.0942109	0.278709	-0.00233756	0.117024	0.287696	Lipid	Medium Chain Fatty Acid
5-dodecenoate (12:1n7)	0.00115527	0.588782	0.767772	-0.00275446	0.122017	0.294773	Lipid	Medium Chain Fatty Acid
caprylate (8:0)	-0.00525569	0.1902	0.410631	-0.00411653	0.190549	0.393183	Lipid	Medium Chain Fatty Acid
caproate (6:0)	0.000562759	0.619907	0.791474	-0.000858722	0.505327	0.675008	Lipid	Medium Chain Fatty Acid
10-undecenoate (11:1n1)	0.0043192	0.023547	0.136266	0.000343217	0.827518	0.897398	Lipid	Medium Chain Fatty Acid
heptanoate (7:0)	-0.00243161	0.141635	0.348939	-2.60058e-05	0.984825	0.98716	Lipid	Medium Chain Fatty Acid
1-docosahexaenoylglycerol (22:6)	-0.00263939	0.262552	0.494751	-0.00489681	0.014853	0.101374	Lipid	Monoacylglycerol
1-linolenoylglycerol (18:3)	-0.00333823	0.1263	0.331444	-0.00438437	0.0170742	0.106143	Lipid	Monoacylglycerol
1-linoleoylglycerol (18:2)	-0.00361796	0.117922	0.318129	-0.00421311	0.0229431	0.126637	Lipid	Monoacylglycerol
2-linoleoylglycerol (18:2)	-0.00334387	0.12754	0.331444	-0.00360684	0.0523181	0.191042	Lipid	Monoacylglycerol
1-myristoylglycerol (14:0)	-0.00244633	0.321941	0.562247	-0.00347849	0.0526066	0.191042	Lipid	Monoacylglycerol
1-dihomo-linoleoylglycerol (20:2)	-0.00371791	0.0674507	0.240755	-0.00189339	0.248075	0.464195	Lipid	Monoacylglycerol
1-dihomo-linolenylglycerol (20:3)	-0.00322752	0.126058	0.331444	-0.00179699	0.320379	0.534139	Lipid	Monoacylglycerol
1-palmitoylglycerol (16:0)	-0.0039931	0.0969922	0.283159	-0.0010636	0.560557	0.719873	Lipid	Monoacylglycerol
1,2-dilinoleoyl-GPC (18:2/18:2)	0.000594267	0.695455	0.846943	0.0021058	0.0787254	0.234973	Lipid	Phosphatidylcholine
1-myristoyl-2-palmitoyl-GPC (14:0/16:0)	-0.000109983	0.938422	0.974285	-0.00273462	0.08211	0.24115	Lipid	Phosphatidylcholine
1-palmitoyl-2-docosahexaenoyl-GPC (16:0/22:6)	0.00259807	0.0314442	0.159072	0.00148186	0.164189	0.359341	Lipid	Phosphatidylcholine
1-palmitoyl-2-arachidonoyl-GPC (16:0/20:4n6)	0.00229987	0.0470201	0.189242	0.00117058	0.239279	0.455237	Lipid	Phosphatidylcholine
1-stearoyl-2-arachidonoyl-GPC (18:0/20:4)	0.00234211	0.0260926	0.142534	0.00104506	0.307804	0.529835	Lipid	Phosphatidylcholine
1-linoleoyl-2-linolenoyl-GPC (18:2/18:3)*	-0.0025463	0.226626	0.44768	0.00162343	0.315528	0.533718	Lipid	Phosphatidylcholine
1-palmitoleoyl-2-linolenoyl-GPC (16:1/18:3)*	-0.00156158	0.425665	0.658643	-0.00135676	0.418585	0.611585	Lipid	Phosphatidylcholine
1-stearoyl-2-linoleoyl-GPC (18:0/18:2)*	0.000240515	0.796529	0.898207	0.000593556	0.466468	0.651519	Lipid	Phosphatidylcholine
1-stearoyl-2-docosahexaenoyl-GPC (18:0/22:6)	0.00134318	0.326137	0.564535	0.000815706	0.528771	0.689026	Lipid	Phosphatidylcholine
1-myristoyl-2-arachidonoyl-GPC (14:0/20:4)*	0.00306386	0.091929	0.27749	0.000980171	0.535593	0.696985	Lipid	Phosphatidylcholine
1,2-dipalmitoyl-GPC (16:0/16:0)	0.00116501	0.199937	0.419156	0.000610555	0.585745	0.742451	Lipid	Phosphatidylcholine
1-palmitoyl-2-linoleoyl-GPC (16:0/18:2)	0.000350383	0.716256	0.853858	-0.000409564	0.630676	0.768566	Lipid	Phosphatidylcholine
1-oleoyl-2-docosahexaenoyl-GPC (18:1/22:6)*	0.000314987	0.796747	0.898207	0.000221029	0.832702	0.898424	Lipid	Phosphatidylcholine
1-palmitoyl-2-arachidonoyl-GPE (16:0/20:4)*	-0.0017085	0.295638	0.535126	-0.00357273	0.0156795	0.1034	Lipid	Phosphatidylethanolamine
1-palmitoyl-2-linoleoyl-GPE (16:0/18:2)	-0.0038225	0.0313727	0.159072	-0.0041499	0.0162072	0.104757	Lipid	Phosphatidylethanolamine
1-stearoyl-2-linoleoyl-GPE (18:0/18:2)*	-0.00292926	0.0776061	0.26082	-0.00391932	0.0161382	0.104757	Lipid	Phosphatidylethanolamine
1-stearoyl-2-arachidonoyl-GPE (18:0/20:4)	-0.000979698	0.541125	0.744061	-0.00316233	0.0247863	0.130764	Lipid	Phosphatidylethanolamine
1-stearoyl-2-docosahexaenoyl-GPE (18:0/22:6)*	-0.00242593	0.149772	0.364317	-0.00282929	0.0282853	0.138981	Lipid	Phosphatidylethanolamine
1-palmitoyl-2-stearoyl-GPE (16:0/18:0)*	0.000380634	0.845421	0.921764	-0.00190353	0.21693	0.429461	Lipid	Phosphatidylethanolamine
1,2-dilinoleoyl-GPE (18:2/18:2)*	-0.00375782	0.0634995	0.231726	-0.00094951	0.553012	0.713942	Lipid	Phosphatidylethanolamine
1,2-dipalmitoyl-GPE (16:0/16:0)*	-6.92724e-05	0.968574	0.987832	0.000288623	0.850143	0.911826	Lipid	Phosphatidylethanolamine
1-palmitoyl-2-arachidonoyl-GPI (16:0/20:4)*	0.00209867	0.136864	0.344035	0.00153957	0.287101	0.512268	Lipid	Phosphatidylinositol
1-stearoyl-2-linoleoyl-GPI (18:0/18:2)	0.00256752	0.0530963	0.207713	0.00122255	0.387394	0.591701	Lipid	Phosphatidylinositol
1-palmitoyl-2-linoleoyl-GPI (16:0/18:2)	0.00211803	0.175485	0.394539	0.00120197	0.454344	0.643599	Lipid	Phosphatidylinositol
1-stearoyl-2-oleoyl-GPI (18:0/18:1)*	0.00419156	0.0129744	0.101401	-0.000964854	0.598252	0.75244	Lipid	Phosphatidylinositol
1-stearoyl-2-oleoyl-GPS (18:0/18:1)	0.00368728	0.0506529	0.19984	0.00271366	0.102374	0.272998	Lipid	Phosphatidylserine
glycerophosphoethanolamine	0.00153419	0.294242	0.534514	0.0019405	0.0839015	0.242818	Lipid	Phospholipid Metabolism
trimethylamine N-oxide	0.00072155	0.752842	0.875571	-0.0021	0.366907	0.572401	Lipid	Phospholipid Metabolism
choline	0.00126069	0.229943	0.449936	0.00080344	0.468679	0.651519	Lipid	Phospholipid Metabolism
1-(1-enyl-stearoyl)-2-oleoyl-GPE (P-18:0/18:1)	0.00232894	0.082132	0.264227	0.0024967	0.0349159	0.151458	Lipid	Plasmalogen
1-(1-enyl-palmitoyl)-2-oleoyl-GPC (P-16:0/18:1)*	0.00253413	0.081061	0.263381	0.00235575	0.0699025	0.219373	Lipid	Plasmalogen
1-(1-enyl-palmitoyl)-2-oleoyl-GPE (P-16:0/18:1)*	0.000703249	0.612792	0.78945	0.00152444	0.235172	0.453612	Lipid	Plasmalogen
1-(1-enyl-palmitoyl)-2-palmitoleoyl-GPC (P-16:0/16:1)*	0.000905632	0.552474	0.749412	-0.000878094	0.583194	0.741142	Lipid	Plasmalogen
docosadienoate (22:2n6)	-0.00153124	0.321139	0.562247	-0.00339212	0.0145011	0.101094	Lipid	Polyunsaturated Fatty Acid (n3 and n6)
hexadecadienoate (16:2n6)	-0.00202885	0.326062	0.564535	-0.0037549	0.0218186	0.123136	Lipid	Polyunsaturated Fatty Acid (n3 and n6)
docosahexaenoate (DHA; 22:6n3)	-0.001295	0.455248	0.687178	-0.0033179	0.0271714	0.13607	Lipid	Polyunsaturated Fatty Acid (n3 and n6)
linolenate (18:3n3 or 3n6)	-0.00159593	0.410283	0.641108	-0.00290718	0.0621667	0.207233	Lipid	Polyunsaturated Fatty Acid (n3 and n6)
linoleate (18:2n6)	-0.00101091	0.568795	0.759948	-0.00217854	0.116618	0.287696	Lipid	Polyunsaturated Fatty Acid (n3 and n6)
dihomolinoleate (20:2n6)	-0.000802429	0.643956	0.810539	-0.00194167	0.143221	0.325623	Lipid	Polyunsaturated Fatty Acid (n3 and n6)
adrenate (22:4n6)	-0.000405089	0.828953	0.913638	-0.0021038	0.145775	0.329344	Lipid	Polyunsaturated Fatty Acid (n3 and n6)
docosapentaenoate (n6 DPA; 22:5n6)	-0.00166003	0.348509	0.585406	-0.00170269	0.236724	0.454809	Lipid	Polyunsaturated Fatty Acid (n3 and n6)
arachidonate (20:4n6)	-0.000495447	0.777773	0.888624	-0.00100571	0.458004	0.647074	Lipid	Polyunsaturated Fatty Acid (n3 and n6)
dihomolinolenate (20:3n3 or 3n6)	-0.00108048	0.521576	0.729919	-0.000858283	0.521566	0.682513	Lipid	Polyunsaturated Fatty Acid (n3 and n6)
docosatrienoate (22:3n3)	0.00171348	0.360293	0.595916	0.000451662	0.760218	0.85936	Lipid	Polyunsaturated Fatty Acid (n3 and n6)
pregnenediol sulfate (C21H34O5S)*	0.00250762	0.22368	0.4442	0.00398388	0.0271861	0.13607	Lipid	Pregnenolone Steroids
21-hydroxypregnanolone disulfate	-0.000447599	0.57973	0.767038	-0.00234547	0.137903	0.318187	Lipid	Pregnenolone Steroids
21-hydroxypregnenolone disulfate	-0.00131955	0.549063	0.747548	-0.00214263	0.286372	0.511902	Lipid	Pregnenolone Steroids
pregnenolone sulfate	0.00109887	0.621056	0.791907	0.00177588	0.323307	0.53756	Lipid	Pregnenolone Steroids
17alpha-hydroxypregnenolone 3-sulfate	0.00118071	0.492394	0.712535	0.000436071	0.731459	0.8389	Lipid	Pregnenolone Steroids
pregnen-diol disulfate*	-0.00187383	0.343977	0.582023	-0.00055261	0.767587	0.864089	Lipid	Pregnenolone Steroids
taurochenodeoxycholate	-0.00144043	0.585867	0.767038	-0.00679099	0.0310931	0.145189	Lipid	Primary Bile Acid Metabolism
glycochenodeoxycholate	4.17586e-05	0.984729	0.995547	-0.00387204	0.128462	0.305058	Lipid	Primary Bile Acid Metabolism
glyco-alpha-muricholate	-0.00246482	0.282406	0.521451	-0.0027042	0.238163	0.455237	Lipid	Primary Bile Acid Metabolism
tauro-beta-muricholate	-0.00182134	0.47882	0.702383	-0.00242382	0.358086	0.56828	Lipid	Primary Bile Acid Metabolism
chenodeoxycholate	0.00568814	0.0174146	0.121653	0.00171098	0.406483	0.605137	Lipid	Primary Bile Acid Metabolism
glyco-beta-muricholate	-0.00125489	0.637224	0.805519	-0.00193182	0.433447	0.628972	Lipid	Primary Bile Acid Metabolism
cholate	0.000157387	0.959514	0.987795	0.000757339	0.76497	0.863134	Lipid	Primary Bile Acid Metabolism
glycochenodeoxycholate glucuronide (1)	-0.00349603	0.114631	0.31373	-0.0003515	0.879524	0.924787	Lipid	Primary Bile Acid Metabolism
glycocholate glucuronide (1)	-0.00583899	0.0275006	0.146621	-0.000196677	0.925021	0.958408	Lipid	Primary Bile Acid Metabolism
5alpha-pregnan-3beta,20beta-diol monosulfate (1)	0.000725601	0.764805	0.881869	0.00404732	0.024927	0.1308	Lipid	Progestin Steroids
pregnanolone/allopregnanolone sulfate	0.000354184	0.852928	0.924362	0.00262078	0.0256078	0.132684	Lipid	Progestin Steroids
5alpha-pregnan-3beta,20alpha-diol disulfate	-0.00105525	0.651854	0.817325	0.00183356	0.393107	0.595765	Lipid	Progestin Steroids
5alpha-pregnan-diol disulfate	-0.00434158	0.126008	0.331444	-0.00198721	0.458123	0.647074	Lipid	Progestin Steroids
pregnanediol-3-glucuronide	-0.00320436	0.228527	0.448795	0.00107585	0.59948	0.753015	Lipid	Progestin Steroids
taurocholenate sulfate*	-0.00348302	0.0905211	0.275793	-0.00562352	0.0619975	0.207233	Lipid	Secondary Bile Acid Metabolism
glycohyocholate	-0.00467049	0.0858286	0.268857	-0.00479042	0.0999889	0.269524	Lipid	Secondary Bile Acid Metabolism
deoxycholate	0.00519592	0.0385685	0.171878	0.00351797	0.100835	0.27037	Lipid	Secondary Bile Acid Metabolism
glycocholenate sulfate*	-0.00246853	0.166572	0.384854	-0.00372517	0.112408	0.284963	Lipid	Secondary Bile Acid Metabolism
taurolithocholate	0.00276623	0.0198414	0.12683	0.00248922	0.121492	0.294773	Lipid	Secondary Bile Acid Metabolism
taurodeoxycholate	0.00410304	0.0794506	0.263381	0.00347322	0.161231	0.356033	Lipid	Secondary Bile Acid Metabolism
glycodeoxycholate	0.00420148	0.0799173	0.263381	0.00326264	0.179933	0.378639	Lipid	Secondary Bile Acid Metabolism
tauroursodeoxycholate	0.00168749	0.44579	0.681223	-0.00336731	0.216487	0.429454	Lipid	Secondary Bile Acid Metabolism
glycodeoxycholate sulfate	-0.0041322	0.118078	0.318129	-0.00362532	0.247992	0.464195	Lipid	Secondary Bile Acid Metabolism
taurolithocholate 3-sulfate	-0.00046943	0.84277	0.921723	-0.00348203	0.25578	0.4705	Lipid	Secondary Bile Acid Metabolism
glycolithocholate sulfate*	-8.20822e-05	0.971648	0.988836	-0.00301757	0.306122	0.529744	Lipid	Secondary Bile Acid Metabolism
hyocholate	0.00160513	0.59677	0.77406	0.00214764	0.325043	0.539528	Lipid	Secondary Bile Acid Metabolism
glycoursodeoxycholate	0.00366792	0.117125	0.317308	-0.00126586	0.674847	0.803232	Lipid	Secondary Bile Acid Metabolism
sphingadienine	0.0013463	0.53162	0.737385	0.00212621	0.227771	0.441697	Lipid	Sphingolipid Synthesis
sphinganine	0.00104061	0.516931	0.727506	0.00162997	0.258849	0.473989	Lipid	Sphingolipid Synthesis
sphingomyelin (d18:2/23:1)*	0.00293698	0.0748484	0.256848	0.00295656	0.0179971	0.109101	Lipid	Sphingomyelins
behenoyl sphingomyelin (d18:1/22:0)*	0.00278277	0.0239035	0.136711	0.0025996	0.024305	0.130029	Lipid	Sphingomyelins
sphingomyelin (d18:1/14:0, d16:1/16:0)*	0.00321279	0.0214189	0.130835	0.00233769	0.0280262	0.138981	Lipid	Sphingomyelins
sphingomyelin (d18:1/24:1, d18:2/24:0)*	0.00204954	0.0581727	0.217981	0.00202896	0.0448853	0.174589	Lipid	Sphingomyelins
sphingomyelin (d18:2/21:0, d16:2/23:0)*	0.0042703	0.0192326	0.12384	0.00268285	0.0484932	0.181375	Lipid	Sphingomyelins
stearoyl sphingomyelin (d18:1/18:0)	0.00347844	0.0179065	0.123207	0.00235954	0.0585768	0.203456	Lipid	Sphingomyelins
sphingomyelin (d17:1/14:0, d16:1/15:0)*	0.00462216	0.028681	0.15	0.00286421	0.059134	0.204351	Lipid	Sphingomyelins
sphingomyelin (d18:1/25:0, d19:0/24:1, d20:1/23:0, d19:1/24:0)*	0.00381422	0.0320891	0.160118	0.00289659	0.0611662	0.206568	Lipid	Sphingomyelins
sphingomyelin (d18:2/14:0, d18:1/14:1)*	0.00251859	0.202689	0.421317	0.00238243	0.0610663	0.206568	Lipid	Sphingomyelins
sphingomyelin (d17:2/16:0, d18:2/15:0)*	0.00459475	0.027735	0.146621	0.00264202	0.0639711	0.210932	Lipid	Sphingomyelins
sphingomyelin (d18:2/18:1)*	0.0019232	0.216221	0.437979	0.00223334	0.0657458	0.212664	Lipid	Sphingomyelins
sphingomyelin (d18:2/16:0, d18:1/16:1)*	0.00241888	0.0733974	0.253649	0.00153284	0.113014	0.285756	Lipid	Sphingomyelins
sphingomyelin (d18:1/18:1, d18:2/18:0)	0.00281463	0.0758511	0.259379	0.00145942	0.214001	0.425387	Lipid	Sphingomyelins
hexadecasphingosine (d16:1)*	0.00348447	0.0333131	0.162435	0.00337227	0.0207961	0.120816	Lipid	Sphingosines
sphingosine	0.000726774	0.69865	0.847742	0.000924453	0.567104	0.726369	Lipid	Sphingosines
3beta,7alpha-dihydroxy-5-cholestenoate	0.000844316	0.592977	0.771186	0.00362416	0.0290651	0.139741	Lipid	Sterol
beta-sitosterol	-0.00485353	0.0423057	0.180472	-0.0033608	0.101726	0.272012	Lipid	Sterol
campesterol	-0.00138116	0.493662	0.713148	-0.00169074	0.290672	0.51675	Lipid	Sterol
7-HOCA	0.00244306	0.0916791	0.27749	0.0011031	0.476611	0.656975	Lipid	Sterol
3beta-hydroxy-5-cholestenoate	0.00151927	0.315614	0.555163	0.000673599	0.689643	0.816164	Lipid	Sterol
4-cholesten-3-one	-0.000649515	0.623221	0.793633	-0.000262307	0.865148	0.920812	Lipid	Sterol
cholesterol	0.00208822	0.084629	0.267855	0.000187419	0.877962	0.92437	Lipid	Sterol
N1-methylinosine	-0.00429962	0.0459317	0.187955	-0.004525	0.0344731	0.15088	Nucleotide	Purine Metabolism
ADP	0.00233879	0.290704	0.530822	0.00347947	0.043892	0.17414	Nucleotide	Purine Metabolism
N2,N2-dimethylguanosine	-0.00428116	0.0501342	0.19984	-0.00455869	0.0449766	0.174589	Nucleotide	Purine Metabolism
adenine	-0.00396341	0.0506751	0.19984	-0.00304485	0.0755453	0.23116	Nucleotide	Purine Metabolism
AMP	0.00411229	0.0285367	0.15	0.00242433	0.115425	0.287384	Nucleotide	Purine Metabolism
N6-methyladenosine	-0.00196702	0.217198	0.437979	0.00141778	0.241066	0.457744	Nucleotide	Purine Metabolism
guanosine	3.0819e-05	0.985367	0.995547	0.00133866	0.30741	0.529835	Nucleotide	Purine Metabolism
xanthine	0.000330103	0.797503	0.898207	0.00147141	0.363269	0.57118	Nucleotide	Purine Metabolism
inosine	0.00418146	0.216823	0.437979	0.00231997	0.415115	0.608337	Nucleotide	Purine Metabolism
xanthosine	-0.00256614	0.141158	0.348939	-0.00134748	0.515929	0.682285	Nucleotide	Purine Metabolism
allantoin	-0.00081412	0.541251	0.744061	-0.000314682	0.799001	0.884815	Nucleotide	Purine Metabolism
urate	0.00145383	0.361897	0.595994	-7.77284e-05	0.95017	0.970636	Nucleotide	Purine Metabolism
3-ureidopropionate	-0.00148794	0.479114	0.702383	-0.0056631	0.0160769	0.104757	Nucleotide	Pyrimidine Metabolism
beta-alanine	-0.00117835	0.385199	0.617224	-0.0017602	0.22365	0.435693	Nucleotide	Pyrimidine Metabolism
5-methyluridine (ribothymidine)	0.00268451	0.0324547	0.16112	0.00135643	0.255183	0.4705	Nucleotide	Pyrimidine Metabolism
3-aminoisobutyrate	-0.000329884	0.872091	0.929091	-0.00199036	0.333125	0.546436	Nucleotide	Pyrimidine Metabolism
5,6-dihydrouracil	0.000306229	0.849639	0.923275	-0.00112699	0.40731	0.605137	Nucleotide	Pyrimidine Metabolism
2'-O-methylcytidine	0.000165071	0.919856	0.962159	0.000866239	0.498561	0.668401	Nucleotide	Pyrimidine Metabolism
CMP	0.00106558	0.563995	0.757675	0.000874168	0.521156	0.682513	Nucleotide	Pyrimidine Metabolism
2'-deoxyuridine	-0.000579617	0.725156	0.857561	-0.000739173	0.61641	0.763472	Nucleotide	Pyrimidine Metabolism
orotate	-0.000409148	0.826105	0.913638	0.000961804	0.646974	0.781493	Nucleotide	Pyrimidine Metabolism
3-methylcytidine	-0.00178393	0.268371	0.501849	-0.000671886	0.650362	0.784615	Nucleotide	Pyrimidine Metabolism
5,6-dihydrothymine	0.00192293	0.196098	0.415614	-0.00056355	0.695502	0.820811	Nucleotide	Pyrimidine Metabolism
orotidine	-0.00311516	0.300223	0.538748	-0.00137467	0.708155	0.826746	Nucleotide	Pyrimidine Metabolism
dihydroorotate	0.00184102	0.370003	0.605122	-0.000469103	0.80061	0.884933	Nucleotide	Pyrimidine Metabolism
uracil	-4.38448e-05	0.977468	0.992693	-0.00021434	0.869176	0.921081	Nucleotide	Pyrimidine Metabolism
2'-O-methyluridine	-0.000433304	0.79284	0.898207	0.000113647	0.940616	0.967102	Nucleotide	Pyrimidine Metabolism
glucuronide of C14H22O4 (2)*	-0.00393501	0.0775099	0.26082	-0.00469016	0.0169575	0.106143	Partially Characterized Molecules	Partially Characterized Molecules
glucuronide of C10H18O2 (8)*	-0.00386078	0.0620136	0.227151	-0.0036432	0.122685	0.295132	Partially Characterized Molecules	Partially Characterized Molecules
glucuronide of C10H18O2 (7)*	-0.00616104	0.0619444	0.227151	-0.0040191	0.169712	0.365649	Partially Characterized Molecules	Partially Characterized Molecules
glucuronide of C19H28O4 (1)*	-0.000570555	0.838604	0.919456	-0.00093819	0.295482	0.52006	Partially Characterized Molecules	Partially Characterized Molecules
glucuronide of C8H16O2 (1)*	-0.00440485	0.11259	0.311936	-0.00181876	0.620081	0.765106	Partially Characterized Molecules	Partially Characterized Molecules
glycine conjugate of C10H14O2 (1)*	-0.00467137	0.0234747	0.136266	-0.000761571	0.700315	0.821947	Partially Characterized Molecules	Partially Characterized Molecules
glucuronide of C10H18O2 (1)*	-0.00153669	0.313082	0.552698	-0.000612696	0.755904	0.856866	Partially Characterized Molecules	Partially Characterized Molecules
glucuronide of C8H14O2 (3)*	-8.55365e-05	0.969256	0.987832	-0.000634603	0.765882	0.863165	Partially Characterized Molecules	Partially Characterized Molecules
4-hydroxyphenylacetylglutamine	-0.00651364	0.0555098	0.212896	-0.00749873	0.0156372	0.1034	Peptide	Acetylated Peptides
phenylacetylglutamate	-0.00425774	0.128498	0.331585	-0.00514001	0.0845883	0.242818	Peptide	Acetylated Peptides
phenylacetylglutamine	-0.00217448	0.303266	0.54123	-0.00219811	0.319002	0.534139	Peptide	Acetylated Peptides
phenylacetylcarnitine	0.00310476	0.220038	0.440545	0.00182753	0.39125	0.594155	Peptide	Acetylated Peptides
phenylacetylmethionine	-0.00404464	0.141237	0.348939	-0.00237682	0.409146	0.605137	Peptide	Acetylated Peptides
phenylacetylhistidine	-0.0030544	0.122864	0.327413	-0.00153658	0.489811	0.664379	Peptide	Acetylated Peptides
glycylvaline	0.00141935	0.353835	0.589646	-0.00190677	0.0929081	0.255432	Peptide	Dipeptide
prolylglycine	-0.00264284	0.16837	0.384854	-0.00267592	0.1097	0.281017	Peptide	Dipeptide
isoleucylglycine	-0.0020471	0.230029	0.449936	0.00169376	0.246328	0.464124	Peptide	Dipeptide
histidylalanine	-0.00109389	0.438823	0.671626	0.00134946	0.301684	0.523921	Peptide	Dipeptide
valylglycine	-0.000522766	0.790687	0.898207	0.00148216	0.365221	0.572159	Peptide	Dipeptide
ADpSGEGDFXAEGGGVR*	0.00215254	0.115217	0.31373	0.00173789	0.0778416	0.233764	Peptide	Fibrinogen Cleavage Peptide
ADSGEGDFXAEGGGVR*	0.000698532	0.581104	0.767038	0.00119874	0.203805	0.410995	Peptide	Fibrinogen Cleavage Peptide
gamma-glutamylhistidine	-0.00318516	0.156019	0.366795	-0.00267073	0.0408775	0.165886	Peptide	Gamma-glutamyl Amino Acid
gamma-glutamylphenylalanine	-0.00127968	0.362593	0.595994	-0.00239344	0.108547	0.279529	Peptide	Gamma-glutamyl Amino Acid
gamma-glutamyltryptophan	0.000739021	0.587577	0.767224	-0.00221965	0.166908	0.361589	Peptide	Gamma-glutamyl Amino Acid
gamma-glutamylmethionine	0.00293123	0.0367847	0.169884	0.00195708	0.210169	0.418622	Peptide	Gamma-glutamyl Amino Acid
gamma-glutamylglycine	0.000208358	0.898055	0.945423	-0.00158323	0.252557	0.467733	Peptide	Gamma-glutamyl Amino Acid
gamma-glutamyltyrosine	0.000910154	0.566093	0.75841	-0.00167278	0.317948	0.534139	Peptide	Gamma-glutamyl Amino Acid
gamma-glutamylleucine	0.00138439	0.207145	0.426501	0.000968703	0.493343	0.66602	Peptide	Gamma-glutamyl Amino Acid
gamma-glutamyl-alpha-lysine	0.000555321	0.654072	0.818008	-0.000730691	0.614037	0.762469	Peptide	Gamma-glutamyl Amino Acid
gamma-glutamylvaline	-0.000555662	0.657173	0.81979	-0.000521777	0.689893	0.816164	Peptide	Gamma-glutamyl Amino Acid
gamma-glutamylisoleucine*	-0.000309615	0.813167	0.906941	0.000503556	0.705742	0.825261	Peptide	Gamma-glutamyl Amino Acid
gamma-glutamyl-epsilon-lysine	0.0010251	0.45703	0.687178	0.000319448	0.812675	0.889449	Peptide	Gamma-glutamyl Amino Acid
gamma-glutamylglutamate	-0.000395561	0.847858	0.923275	0.000256756	0.868539	0.921081	Peptide	Gamma-glutamyl Amino Acid
gamma-glutamylthreonine	0.00323887	0.020603	0.12816	3.85356e-05	0.977041	0.985294	Peptide	Gamma-glutamyl Amino Acid
HWESASLLR	-0.000923913	0.490062	0.712156	0.00248567	0.0230235	0.126637	Peptide	Polypeptide
HWESASXX*	0.00107208	0.553037	0.749412	0.00236266	0.110431	0.282147	Peptide	Polypeptide
1H-indole-7-acetic acid	0.000265051	0.897819	0.945423	0.00312424	0.0857883	0.244823	Xenobiotics	Bacterial/Fungal
N-methylpipecolate	-0.00298341	0.202294	0.421317	-0.00310949	0.141416	0.323238	Xenobiotics	Bacterial/Fungal
tartronate (hydroxymalonate)	-0.00137159	0.455447	0.687178	-0.00161556	0.249024	0.464195	Xenobiotics	Bacterial/Fungal
benzoate	0.000291875	0.81756	0.91004	-0.00209295	0.0263065	0.134425	Xenobiotics	Benzoate Metabolism
o-cresol sulfate	-0.00161079	0.353068	0.589646	-0.00399018	0.0344736	0.15088	Xenobiotics	Benzoate Metabolism
propyl 4-hydroxybenzoate sulfate	-0.00402328	0.178474	0.400338	-0.0049845	0.0658039	0.212664	Xenobiotics	Benzoate Metabolism
4-hydroxyhippurate	-0.00380032	0.200934	0.4199	-0.00495645	0.0830189	0.24115	Xenobiotics	Benzoate Metabolism
hippurate	-0.00259175	0.375882	0.610653	-0.00354854	0.202842	0.410735	Xenobiotics	Benzoate Metabolism
3-(3-hydroxyphenyl)propionate sulfate	-0.00031492	0.86846	0.928685	-0.00293624	0.202702	0.410735	Xenobiotics	Benzoate Metabolism
4-vinylphenol sulfate	0.00262145	0.24479	0.466676	-0.00313811	0.237922	0.455237	Xenobiotics	Benzoate Metabolism
3-methoxycatechol sulfate (2)	0.00127531	0.517426	0.727506	-0.0016472	0.248609	0.464195	Xenobiotics	Benzoate Metabolism
3-phenylpropionate (hydrocinnamate)	0.00487456	0.037927	0.171291	0.00238218	0.259342	0.474004	Xenobiotics	Benzoate Metabolism
3-methoxycatechol sulfate (1)	0.00262556	0.272078	0.506843	-0.00211061	0.397916	0.599331	Xenobiotics	Benzoate Metabolism
3-hydroxyhippurate	0.00256118	0.33537	0.572412	-0.00235013	0.442233	0.634469	Xenobiotics	Benzoate Metabolism
p-cresol sulfate	-0.000973422	0.718086	0.853858	0.00176024	0.463472	0.651519	Xenobiotics	Benzoate Metabolism
catechol sulfate	0.00261879	0.396254	0.628237	0.00168186	0.493954	0.66602	Xenobiotics	Benzoate Metabolism
4-methylguaiacol sulfate	-0.00531469	0.0765671	0.260601	-0.00108554	0.679899	0.807276	Xenobiotics	Benzoate Metabolism
4-ethylphenyl sulfate	-0.00170129	0.601878	0.777591	0.000695179	0.811349	0.889449	Xenobiotics	Benzoate Metabolism
guaiacol sulfate	-0.000267049	0.935043	0.971945	-0.000677556	0.812898	0.889449	Xenobiotics	Benzoate Metabolism
4-acetylphenyl sulfate	0.00343959	0.0896101	0.274729	-0.000286944	0.874524	0.921745	Xenobiotics	Benzoate Metabolism
4-methylcatechol sulfate	-0.00175291	0.561704	0.755635	-0.000301443	0.910521	0.948419	Xenobiotics	Benzoate Metabolism
3-(3-hydroxyphenyl)propionate	0.00235663	0.167566	0.384854	9.80439e-05	0.957191	0.974159	Xenobiotics	Benzoate Metabolism
EDTA	0.00186852	0.0294881	0.152589	0.00193975	0.0151228	0.102499	Xenobiotics	Chemical
succinimide	-0.00140504	0.390729	0.621899	-0.00425659	0.0168514	0.106143	Xenobiotics	Chemical
thioproline	0.00285483	0.0387031	0.171878	0.00259618	0.0283373	0.138981	Xenobiotics	Chemical
trizma acetate	-0.00878822	0.0180206	0.123207	-0.00617522	0.0829164	0.24115	Xenobiotics	Chemical
sulfate*	-0.00251	0.0843621	0.267855	-0.0020825	0.0871157	0.247165	Xenobiotics	Chemical
O-sulfo-L-tyrosine	-0.00304886	0.115484	0.31373	-0.00249883	0.13119	0.307447	Xenobiotics	Chemical
perfluorooctanesulfonate (PFOS)	0.00382784	0.127766	0.331444	0.00305708	0.161601	0.356033	Xenobiotics	Chemical
diethanolamine	-0.00308869	0.260839	0.492472	0.00265498	0.265772	0.482145	Xenobiotics	Chemical
diglycerol	-0.00410408	0.095768	0.280422	-0.00198126	0.339645	0.55157	Xenobiotics	Chemical
dimethyl sulfone	-0.00233325	0.301545	0.54013	0.00178358	0.344025	0.555808	Xenobiotics	Chemical
ectoine	-0.00120963	0.578687	0.767038	-0.00216841	0.380226	0.58441	Xenobiotics	Chemical
indoleacetylcarnitine*	0.00345417	0.13237	0.338029	0.00162032	0.433751	0.628972	Xenobiotics	Chemical
2-methoxyresorcinol sulfate	0.00177365	0.289855	0.530822	-0.00141155	0.45083	0.64048	Xenobiotics	Chemical
2-aminophenol sulfate	-0.000339233	0.889939	0.943448	-0.00163761	0.509688	0.677733	Xenobiotics	Chemical
iminodiacetate (IDA)	-0.000308037	0.830562	0.913712	-0.000715411	0.585253	0.742451	Xenobiotics	Chemical
ethyl glucuronide	-0.000456856	0.629126	0.797001	0.000674642	0.588118	0.743527	Xenobiotics	Chemical
6-hydroxyindole sulfate	-0.000119719	0.961616	0.987832	-0.00122723	0.621222	0.765547	Xenobiotics	Chemical
3-acetylphenol sulfate	0.00106307	0.516881	0.727506	-0.000713964	0.732429	0.839027	Xenobiotics	Chemical
3-hydroxypyridine sulfate	0.00733214	0.0306175	0.156774	0.00100738	0.749594	0.851693	Xenobiotics	Chemical
desmethylnaproxen sulfate	-0.00306393	0.151785	0.364317	-0.00243227	0.0877255	0.248174	Xenobiotics	Drug - Analgesics, Anesthetics
diclofenac	0.0011822	0.388239	0.620421	0.00271091	0.141008	0.32306	Xenobiotics	Drug - Analgesics, Anesthetics
tramadol	0.00034698	0.852566	0.924362	-0.00163874	0.180009	0.378639	Xenobiotics	Drug - Analgesics, Anesthetics
N-ethylglycinexylidide	-0.00468268	0.100353	0.29037	-0.00296514	0.195995	0.400191	Xenobiotics	Drug - Analgesics, Anesthetics
4-acetamidophenol	0.000542532	0.793269	0.898207	-0.00287027	0.256976	0.471445	Xenobiotics	Drug - Analgesics, Anesthetics
ibuprofen	0.000215683	0.698219	0.847742	0.00067821	0.310088	0.529924	Xenobiotics	Drug - Analgesics, Anesthetics
carboxyibuprofen	-0.00125893	0.546393	0.747374	-0.0013425	0.316132	0.533814	Xenobiotics	Drug - Analgesics, Anesthetics
4-acetamidophenylglucuronide	0.00162399	0.671079	0.826594	0.00360077	0.319598	0.534139	Xenobiotics	Drug - Analgesics, Anesthetics
N-desmethyl tramadol	0.000730759	0.676667	0.831382	-0.00129917	0.351175	0.56096	Xenobiotics	Drug - Analgesics, Anesthetics
O-desmethyltramadol	2.96293e-08	0.999987	0.999987	-0.000774367	0.385078	0.589085	Xenobiotics	Drug - Analgesics, Anesthetics
ibuprofen acyl glucuronide	-0.00024782	0.828622	0.913638	-0.000703473	0.448657	0.639254	Xenobiotics	Drug - Analgesics, Anesthetics
4-acetaminophen sulfate	-0.000147427	0.955167	0.984355	-0.00285279	0.46928	0.651519	Xenobiotics	Drug - Analgesics, Anesthetics
2-hydroxyibuprofen	-0.000557588	0.707838	0.85013	-0.000916331	0.490116	0.664379	Xenobiotics	Drug - Analgesics, Anesthetics
O-desmethyltramadol glucuronide	0.000614531	0.731857	0.860283	-0.00106328	0.51821	0.682285	Xenobiotics	Drug - Analgesics, Anesthetics
2-hydroxyacetaminophen sulfate*	0.00035288	0.868862	0.928685	-0.00172814	0.527009	0.687647	Xenobiotics	Drug - Analgesics, Anesthetics
2-methoxyacetaminophen sulfate*	0.000540498	0.798017	0.898207	0.00104832	0.617707	0.764109	Xenobiotics	Drug - Analgesics, Anesthetics
morphine-6-glucuronide	-0.000828569	0.496584	0.716312	-0.00056095	0.665752	0.795317	Xenobiotics	Drug - Analgesics, Anesthetics
3-(N-acetyl-L-cystein-S-yl) acetaminophen	0.000332777	0.89474	0.944266	0.0009728	0.703035	0.823724	Xenobiotics	Drug - Analgesics, Anesthetics
naproxen	-1.65639e-05	0.994071	0.995922	-0.000290697	0.777189	0.872885	Xenobiotics	Drug - Analgesics, Anesthetics
lidocaine	-0.0031173	0.160714	0.374234	0.000649066	0.794517	0.881192	Xenobiotics	Drug - Analgesics, Anesthetics
2-methoxyacetaminophen glucuronide*	0.00102625	0.58728	0.767224	0.000398864	0.832298	0.898424	Xenobiotics	Drug - Analgesics, Anesthetics
morphine-3-glucuronide	-0.000827864	0.653452	0.818008	0.000210855	0.905152	0.944843	Xenobiotics	Drug - Analgesics, Anesthetics
4-aminophenol sulfate (2)	0.000349832	0.75276	0.875571	-9.54643e-05	0.9249	0.958408	Xenobiotics	Drug - Analgesics, Anesthetics
3-(cystein-S-yl)acetaminophen*	3.52455e-05	0.984665	0.995547	6.67453e-05	0.96697	0.980574	Xenobiotics	Drug - Analgesics, Anesthetics
morphine	-0.00036859	0.777332	0.888624	-2.67878e-05	0.979237	0.985294	Xenobiotics	Drug - Analgesics, Anesthetics
linezolid	-0.000406177	0.711049	0.85013	-0.00431399	0.0622124	0.207233	Xenobiotics	Drug - Antibiotic
amoxicillin	-0.00171877	0.510725	0.726001	0.00317677	0.106295	0.277389	Xenobiotics	Drug - Antibiotic
clindamycin	0.000580354	0.670413	0.826594	-0.00278648	0.166231	0.361589	Xenobiotics	Drug - Antibiotic
meropenem	-0.0012392	0.598057	0.774702	-0.0026888	0.217647	0.429753	Xenobiotics	Drug - Antibiotic
ofloxacin	0.000843417	0.802404	0.900977	-0.00185017	0.263828	0.479508	Xenobiotics	Drug - Antibiotic
metronidazole	-0.00412043	0.594741	0.772453	-0.00156339	0.382346	0.586745	Xenobiotics	Drug - Antibiotic
moxifloxacin	-0.00023207	0.665742	0.825216	-0.00177679	0.402723	0.603775	Xenobiotics	Drug - Antibiotic
ceftazidime	-0.000339812	0.709787	0.85013	-0.000429516	0.467922	0.651519	Xenobiotics	Drug - Antibiotic
doxycycline	0.000285546	0.841604	0.921711	-0.000898185	0.486648	0.664379	Xenobiotics	Drug - Antibiotic
fluconazole	0.00362923	0.118424	0.318183	-0.000669141	0.571844	0.728616	Xenobiotics	Drug - Antibiotic
ciprofloxacin	-0.00265051	0.340061	0.576655	0.000421399	0.675811	0.803401	Xenobiotics	Drug - Antibiotic
cefazolin	0.000647722	0.675483	0.830972	0.000279831	0.759645	0.85936	Xenobiotics	Drug - Antibiotic
azithromycin	-0.000510039	0.507445	0.72421	0.000319082	0.822599	0.893472	Xenobiotics	Drug - Antibiotic
penicillin G	0	0		-0.00180305	0.185279	0.38475	Xenobiotics	Drug - Antibiotic
mycophenolic acid glucuronide	-0.00221963	0.172443	0.390403	-0.0027622	0.0753138	0.23116	Xenobiotics	Drug - Antiinflammatory, Immunosuppressant
mycophenolic acid	-0.00200335	0.2133	0.434599	-0.00266997	0.0750166	0.23116	Xenobiotics	Drug - Antiinflammatory, Immunosuppressant
prednisolone	0.00170965	0.391071	0.621899	8.66161e-05	0.873025	0.921366	Xenobiotics	Drug - Antiinflammatory, Immunosuppressant
lisinopril	0.00281703	0.150703	0.364317	0.00281939	0.182463	0.380522	Xenobiotics	Drug - Cardiovascular
metoprolol acid metabolite*	0.000978089	0.743121	0.869345	-0.00287151	0.294357	0.52006	Xenobiotics	Drug - Cardiovascular
verapamil	-0.000666996	0.614286	0.78945	-0.000725512	0.344532	0.555808	Xenobiotics	Drug - Cardiovascular
milrinone*	-0.000257336	0.397845	0.6296	-0.000120416	0.357825	0.56828	Xenobiotics	Drug - Cardiovascular
metoprolol	0.00212427	0.223917	0.4442	-0.00107293	0.484276	0.662908	Xenobiotics	Drug - Cardiovascular
alpha-hydroxymetoprolol	0.00129827	0.434918	0.66774	-0.000856674	0.557501	0.718216	Xenobiotics	Drug - Cardiovascular
candesartan	0.000184818	0.926334	0.966151	-0.00026431	0.854091	0.914027	Xenobiotics	Drug - Cardiovascular
valsartan	-0.00110736	0.491267	0.712535	-0.000177066	0.873044	0.921366	Xenobiotics	Drug - Cardiovascular
atenolol	-0.000171151	0.813279	0.906941	0	0	0.995022	Xenobiotics	Drug - Cardiovascular
metoclopramide	-0.00371083	0.113955	0.31373	-0.00496956	0.0170285	0.106143	Xenobiotics	Drug - Gastrointestinal
pantoprazole	0.00331221	0.220273	0.440545	-0.00502936	0.0464583	0.178517	Xenobiotics	Drug - Gastrointestinal
ranitidine	-0.00236533	0.194416	0.415102	-0.00141455	0.357785	0.56828	Xenobiotics	Drug - Gastrointestinal
ondansetron	0.000661393	0.704089	0.849621	-0.000476845	0.726354	0.8389	Xenobiotics	Drug - Gastrointestinal
famotidine	0.00240823	0.190117	0.410631	0.000421072	0.748506	0.851693	Xenobiotics	Drug - Gastrointestinal
p-hydroxyatorvastatin lactone	-0.00108064	0.282911	0.521451	-0.00217145	0.0484842	0.181375	Xenobiotics	Drug - Metabolic
o-hydroxyatorvastatin lactone	-0.00112517	0.461165	0.688579	-0.00228874	0.0575476	0.202038	Xenobiotics	Drug - Metabolic
atorvastatin lactone	-0.00125244	0.475764	0.702383	-0.00227397	0.0689973	0.217933	Xenobiotics	Drug - Metabolic
atorvastatin (lipitor)	-0.00124992	0.44887	0.68273	-0.00237342	0.0898744	0.252081	Xenobiotics	Drug - Metabolic
o-hydroxyatorvastatin	-0.00180804	0.304884	0.542138	-0.00249915	0.103656	0.273428	Xenobiotics	Drug - Metabolic
allopurinol riboside	-0.000373918	0.748855	0.874736	0.00203936	0.239077	0.455237	Xenobiotics	Drug - Metabolic
p-hydroxyatorvastatin	-0.00124192	0.189771	0.410631	-0.00132859	0.254825	0.4705	Xenobiotics	Drug - Metabolic
oxypurinol	0.00113904	0.584577	0.767038	0.000939282	0.69855	0.821947	Xenobiotics	Drug - Metabolic
carbamazepine	0.00159676	0.299008	0.537587	0.00410814	0.0565076	0.199103	Xenobiotics	Drug - Neurological
rocuronium	-0.00201019	0.20433	0.421593	-0.00257279	0.162591	0.357408	Xenobiotics	Drug - Neurological
carbamazepine 10,11-epoxide*	0.00103102	0.583965	0.767038	0.00133193	0.383131	0.587026	Xenobiotics	Drug - Neurological
homoveratric acid	-5.24664e-05	0.836212	0.918492	-0.000387295	0.404416	0.605137	Xenobiotics	Drug - Neurological
valproate (2-propylpentanoate)	0.000340708	0.722023	0.855925	0.000893026	0.41155	0.605842	Xenobiotics	Drug - Neurological
2-propyl-4-pentenoate (4-ene-valproate)	0.000103379	0.90175	0.948292	0.000519485	0.618897	0.764612	Xenobiotics	Drug - Neurological
carbamazepine glucuronide*	0.00207953	0.208677	0.42788	0.000567109	0.632061	0.768566	Xenobiotics	Drug - Neurological
3-hydroxyvalproate	-0.000512375	0.627133	0.795507	0.000361121	0.713998	0.830587	Xenobiotics	Drug - Neurological
2-propyl-2-pentenoate (2-ene-valproate)	-0.000420327	0.75869	0.878105	0.000367802	0.722684	0.836807	Xenobiotics	Drug - Neurological
pyridostigmine	0.000642106	0.772875	0.887173	0	0	0.89769	Xenobiotics	Drug - Neurological
gabapentin	1.01681e-05	0.993765	0.995922	0.000322176	0.833067	0.898424	Xenobiotics	Drug - Neurological
lamotrigine	0	0		0.000487089	0.644544	0.780489	Xenobiotics	Drug - Neurological
fosfomycin	-0.00226348	0.172817	0.390403	0.00195472	0.156145	0.347939	Xenobiotics	Drug - Other
S-carboxymethyl-L-cysteine	-0.00546092	0.0245135	0.137456	-0.00131618	0.487494	0.664379	Xenobiotics	Drug - Other
1-hydroxy-2-naphthalenecarboxylate	-0.00154474	0.45506	0.687178	0.000783783	0.668536	0.79737	Xenobiotics	Drug - Other
venlafaxine	-0.000663507	0.468368	0.694037	-0.000502226	0.39458	0.59707	Xenobiotics	Drug - Psychoactive
O-desmethylvenlafaxine	-0.00059344	0.411797	0.642325	-0.000596395	0.452222	0.641524	Xenobiotics	Drug - Psychoactive
escitalopram	0.000514979	0.798157	0.898207	-0.00114879	0.4788	0.657256	Xenobiotics	Drug - Psychoactive
paroxetine	0.00155177	0.147249	0.359125	-6.91189e-05	0.609091	0.760196	Xenobiotics	Drug - Psychoactive
trazadone	0.00404438	0.0884801	0.27471	-0.000412653	0.780814	0.874585	Xenobiotics	Drug - Psychoactive
hydroxybupropion	-0.000129652	0.827039	0.913638	0	0	0.977537	Xenobiotics	Drug - Psychoactive
fluoxetine	0.0034357	0.0371732	0.169885	0	0	.	Xenobiotics	Drug - Psychoactive
cetirizine	0.00209478	0.297928	0.537587	0.00047448	0.0977509	0.265436	Xenobiotics	Drug - Respiratory
pseudoephedrine	-0.000695448	0.253385	0.480252	-0.000540585	0.340372	0.551833	Xenobiotics	Drug - Respiratory
hydroquinone sulfate	0.0013706	0.573379	0.763984	-0.00555024	0.0309642	0.145189	Xenobiotics	Drug - Topical Agents
salicylate	-0.00172406	0.664933	0.825216	-0.00339309	0.234653	0.453507	Xenobiotics	Drug - Topical Agents
erythritol	-0.00416021	0.0365853	0.169884	-0.00372206	0.034875	0.151458	Xenobiotics	Food Component/Plant
N-(2-furoyl)glycine	-0.00184713	0.541689	0.744061	-0.00412234	0.0918918	0.254069	Xenobiotics	Food Component/Plant
2-keto-3-deoxy-gluconate	-0.00312334	0.0580186	0.217981	-0.00284611	0.0958624	0.262078	Xenobiotics	Food Component/Plant
naringenin 7-glucuronide	-0.000151444	0.864171	0.928685	-0.00171394	0.132898	0.309566	Xenobiotics	Food Component/Plant
2,3-dihydroxyisovalerate	-0.00246756	0.307088	0.544372	-0.00353163	0.184584	0.384123	Xenobiotics	Food Component/Plant
glucuronide of piperine metabolite C17H21NO3 (3)*	0.00139744	0.383382	0.616977	0.00198386	0.218987	0.430909	Xenobiotics	Food Component/Plant
acesulfame	-0.00103454	0.705505	0.849621	0.00281381	0.220943	0.432723	Xenobiotics	Food Component/Plant
sulfate of piperine metabolite C18H21NO3 (1)*	0.000486425	0.578546	0.767038	0.00231919	0.250647	0.465508	Xenobiotics	Food Component/Plant
glucuronide of piperine metabolite C17H21NO3 (5)*	0.00103215	0.456365	0.687178	0.00186806	0.26761	0.484578	Xenobiotics	Food Component/Plant
piperine	0.00351428	0.154704	0.365073	0.00265227	0.295616	0.52006	Xenobiotics	Food Component/Plant
equol sulfate	0.000521786	0.683652	0.835765	0.000880125	0.309116	0.529882	Xenobiotics	Food Component/Plant
N-acetylalliin	0.000661956	0.485632	0.709937	-0.0018855	0.318111	0.534139	Xenobiotics	Food Component/Plant
methyl indole-3-acetate	-0.00629109	0.0215382	0.130835	-0.00219583	0.337018	0.550952	Xenobiotics	Food Component/Plant
sulfate of piperine metabolite C16H19NO3 (2)*	0.00197369	0.227044	0.44768	0.00157756	0.343661	0.555808	Xenobiotics	Food Component/Plant
S-allylcysteine	0.00214288	0.0893849	0.274729	-0.00111041	0.350929	0.56096	Xenobiotics	Food Component/Plant
indolin-2-one	-0.00263457	0.193688	0.414501	-0.00189735	0.36339	0.57118	Xenobiotics	Food Component/Plant
quinate	0.000543081	0.871008	0.928949	-0.00261975	0.3703	0.57367	Xenobiotics	Food Component/Plant
ferulic acid 4-sulfate	0.00330831	0.0946129	0.278709	-0.00198159	0.388002	0.591703	Xenobiotics	Food Component/Plant
ergothioneine	0.000652297	0.795893	0.898207	0.00189749	0.397055	0.599331	Xenobiotics	Food Component/Plant
stachydrine	-0.0041904	0.188021	0.410456	-0.0022337	0.442698	0.634469	Xenobiotics	Food Component/Plant
sulfate of piperine metabolite C16H19NO3 (3)*	0.00183201	0.242264	0.463879	0.00119423	0.481288	0.659743	Xenobiotics	Food Component/Plant
homostachydrine*	0.0036802	0.119306	0.319675	-0.00156954	0.521675	0.682513	Xenobiotics	Food Component/Plant
4-allylphenol sulfate	-0.000504497	0.84422	0.921723	-0.00140625	0.547042	0.710936	Xenobiotics	Food Component/Plant
glucuronide of piperine metabolite C17H21NO3 (4)*	0.00158404	0.375068	0.610343	0.000940651	0.590732	0.745866	Xenobiotics	Food Component/Plant
3-hydroxystachydrine*	-0.00572782	0.113811	0.31373	-0.00160139	0.605682	0.75788	Xenobiotics	Food Component/Plant
phytanate	0.00344119	0.082542	0.264676	-0.000944011	0.608711	0.760196	Xenobiotics	Food Component/Plant
1-kestose	-0.00532414	0.085178	0.268273	-0.00101047	0.652523	0.785642	Xenobiotics	Food Component/Plant
thymol sulfate	0.00238963	0.351125	0.588015	-0.00106158	0.661369	0.79202	Xenobiotics	Food Component/Plant
genistein sulfate*	-0.00125992	0.559726	0.755051	0.000750341	0.754138	0.855859	Xenobiotics	Food Component/Plant
beta-guanidinopropanoate	-0.00256852	0.187431	0.410085	-0.000673783	0.786581	0.876374	Xenobiotics	Food Component/Plant
dihydroferulic acid	0.00202825	0.304104	0.541736	-0.000463048	0.789686	0.877979	Xenobiotics	Food Component/Plant
saccharin	-0.00349514	0.213881	0.434877	-0.00059191	0.832388	0.898424	Xenobiotics	Food Component/Plant
4-ethylphenol glucuronide	-0.000883663	0.580196	0.767038	0.000261538	0.859921	0.918253	Xenobiotics	Food Component/Plant
daidzein sulfate (2)	-0.000645957	0.749518	0.874736	-0.000278259	0.90047	0.941971	Xenobiotics	Food Component/Plant
alliin	0.000786655	0.525797	0.733957	0.000168267	0.920171	0.955412	Xenobiotics	Food Component/Plant
tartarate	-0.00504807	0.0799867	0.263381	0.000174526	0.94097	0.967102	Xenobiotics	Food Component/Plant
2,8-quinolinediol sulfate	-0.00238492	0.13605	0.343817	0.000125803	0.94233	0.967102	Xenobiotics	Food Component/Plant
methyl glucopyranoside (alpha + beta)	0.00320659	0.203812	0.421412	-0.000153043	0.948625	0.970501	Xenobiotics	Food Component/Plant
cinnamoylglycine	-0.00210268	0.544569	0.746968	-0.000130974	0.952931	0.971851	Xenobiotics	Food Component/Plant
eugenol sulfate	-0.00144535	0.532369	0.737385	-5.88519e-05	0.978999	0.985294	Xenobiotics	Food Component/Plant
cotinine	-0.00234729	0.46051	0.688579	0.00470268	0.0798368	0.236123	Xenobiotics	Tobacco Metabolite
norcotinine	-0.000202591	0.734289	0.861073	0.00130352	0.198405	0.403423	Xenobiotics	Tobacco Metabolite
cotinine N-oxide	-0.000465216	0.69973	0.847894	0.00104272	0.410492	0.605842	Xenobiotics	Tobacco Metabolite
hydroxycotinine	-0.000997103	0.64613	0.81223	0.00117183	0.494056	0.66602	Xenobiotics	Tobacco Metabolite
3-hydroxycotinine glucuronide	-0.000455919	0.729742	0.85883	0.000596868	0.699355	0.821947	Xenobiotics	Tobacco Metabolite
1-methylurate	-0.00394786	0.110149	0.306912	-0.00531154	0.0401648	0.165886	Xenobiotics	Xanthine Metabolism
1-methylxanthine	0.00281703	0.150703	0.364317	0.00281939	0.182463	0.380522	Xenobiotics	Xanthine Metabolism
7-methylurate	0.0014853	0.492509	0.712535	-0.00286728	0.187513	0.387739	Xenobiotics	Xanthine Metabolism
3-methylxanthine	0.00110744	0.668621	0.826594	-0.00213362	0.31057	0.529924	Xenobiotics	Xanthine Metabolism
5-acetylamino-6-amino-3-methyluracil	0.00271379	0.279604	0.517904	-0.00218685	0.37349	0.576889	Xenobiotics	Xanthine Metabolism
1,7-dimethylurate	0.00272065	0.275101	0.510528	-0.00190298	0.377289	0.58081	Xenobiotics	Xanthine Metabolism
caffeine	0.00632721	0.0134045	0.102599	-0.0013077	0.603124	0.755647	Xenobiotics	Xanthine Metabolism
7-methylxanthine	0.00440189	0.0369992	0.169884	-0.00104762	0.63303	0.768566	Xenobiotics	Xanthine Metabolism
3,7-dimethylurate	0.000126027	0.930492	0.969139	-0.000691801	0.652823	0.785642	Xenobiotics	Xanthine Metabolism
theophylline	-0.00269666	0.488617	0.71197	-0.00117003	0.669105	0.79737	Xenobiotics	Xanthine Metabolism
1,3,7-trimethylurate	0.00357868	0.144525	0.353365	-0.000507904	0.81511	0.889874	Xenobiotics	Xanthine Metabolism
1,3-dimethylurate	-0.00474496	0.184278	0.40867	-0.000144051	0.953999	0.971924	Xenobiotics	Xanthine Metabolism
theobromine	0.00548418	0.0461831	0.188196	8.95393e-05	0.971491	0.983477	Xenobiotics	Xanthine Metabolism
Note: Results presented following mixed effects modeling of each of the 983 individual metabolites. For day 0, 3 and 7 repeated measures data, correlations between individual metabolites and absolute increase in 25(OH)D levels from day 0 to day 3 over time were determined separately in women (N=151) and in men (N=277) utilizing linear mixed effects models correcting for age, baseline 25(OH)D, abs…
