# Supplementary material for: Sex-Specific Catabolic Metabolism Alterations in the Critically Ill following High Dose Vitamin D
Source: Metabolites. 2022 Feb 25;12(3):207. doi: 10.3390/metabo12030207 (PMC8953844; doi:10.3390/metabo12030207)
Supplement: Supplementary file 1 [file metabolites-12-00207-s001.zip › Table S5.xlsx]

## Sheet: Sex-Stratified
Metabolite	women Beta	women P-value	women q-value	Men Beta	Men P-value	Men q-value	Super Pathway	Sub Pathway
asparagine	0.00309576	0.00701165	0.11429	0.000285599	0.774257	0.867594	Amino Acid	Alanine and Aspartate Metabolism
3-methyl-2-oxovalerate	0.00428235	0.00121363	0.0587191	0.00361902	0.00247973	0.0432687	Amino Acid	BCAA Metabolism
4-methyl-2-oxopentanoate	0.00314172	0.0254885	0.213057	0.00357588	0.00386143	0.0531461	Amino Acid	BCAA Metabolism
leucine	0.00246715	0.0197156	0.185403	0.00351935	0.000376938	0.0162447	Amino Acid	BCAA Metabolism
isoleucine	0.00259967	0.014822	0.170365	0.00300796	0.000382815	0.0162447	Amino Acid	BCAA Metabolism
isovalerylglycine	-0.00676449	0.0091542	0.133624	-0.00260679	0.222484	0.428293	Amino Acid	BCAA Metabolism
3-methyl catechol sulfate (1)	0.00716574	0.00524302	0.105817	-0.00138366	0.558082	0.720825	Xenobiotics	Benzoate Metabolism
perfluorooctanoate (PFOA)*	0.00579832	0.00746745	0.119724	0.0028337	0.107826	0.272822	Xenobiotics	Chemical
1,2,3-benzenetriol sulfate (2)	0.00751962	0.00272522	0.0807655	0.00268615	0.179118	0.374346	Xenobiotics	Chemical
4-hydroxychlorothalonil	0.00458623	0.0196815	0.185403	-0.00053911	0.761638	0.859837	Xenobiotics	Chemical
guanidinoacetate	0.00494066	0.00856367	0.130762	0.00223992	0.180482	0.376391	Amino Acid	Creatine Metabolism
behenoyl dihydrosphingomyelin (d18:0/22:0)*	0.00478164	0.00502164	0.105817	0.00343724	0.0366145	0.152067	Lipid	Dihydrosphingomyelins
sphingomyelin (d18:0/20:0, d16:0/22:0)*	0.00403867	0.0222442	0.198381	0.00254072	0.114004	0.27773	Lipid	Dihydrosphingomyelins
hydrochlorothiazide	0.00519982	0.016024	0.171371	0.00120778	0.431921	0.628284	Xenobiotics	Drug - Cardiovascular
metformin	0.014568	0.00126456	0.0587191	0.00313233	0.0607124	0.199149	Xenobiotics	Drug - Metabolic
arachidonoyl ethanolamide	0.00452782	0.00135626	0.0587191	0.000774824	0.503943	0.673764	Lipid	Endocannabinoid
2-aminoheptanoate	0.00622115	0.00121245	0.0587191	0.0045062	0.00508186	0.0570103	Lipid	Fatty Acid, Amino
DSGEGDFXAEGGGVR*	0.00410332	0.0193141	0.185188	0.00227915	0.0561482	0.192074	Peptide	Fibrinogen Cleavage Peptide
umbelliferone sulfate	0.00628241	0.000153857	0.0271793	0.00628241	0.000153857	0.00997062	Xenobiotics	Food Component/Plant
pyrraline	0.00636342	0.00266868	0.0807655	0.000515402	0.758154	0.859837	Xenobiotics	Food Component/Plant
gamma-glutamyl-2-aminobutyrate	0.00483752	0.00595524	0.105817	0.00311324	0.0444674	0.168263	Peptide	Gamma-glutamyl Amino Acid
gamma-glutamylcitrulline*	0.00472213	0.00670499	0.11306	0.00383467	0.0223241	0.117775	Peptide	Gamma-glutamyl Amino Acid
gamma-glutamylglutamine	0.00389834	0.0137489	0.163957	0.00217196	0.137802	0.312053	Peptide	Gamma-glutamyl Amino Acid
2-aminobutyrate	0.0034513	0.0139145	0.163957	0.00199234	0.101423	0.262263	Amino Acid	Glutathione Metabolism
3-phosphoglycerate	0.00470975	0.0161208	0.171371	0.00314711	0.0568265	0.192074	Carbohydrate	Glycolysis, Gluconeogenesis, and Pyruvate Metabolism
lactate	0.00457355	0.000232629	0.0271793	0.000175078	0.867458	0.924278	Carbohydrate	Glycolysis, Gluconeogenesis, and Pyruvate Metabolism
lactosyl-N-behenoyl-sphingosine (d18:1/22:0)*	0.00617154	6.98547e-05	0.0271793	0.0016708	0.253894	0.469319	Lipid	Lactosylceramides
lactosyl-N-nervonoyl-sphingosine (d18:1/24:1)*	0.00519622	0.000284241	0.0277988	0.00206156	0.13262	0.306722	Lipid	Lactosylceramides
lactosyl-N-palmitoyl-sphingosine (d18:1/16:0)	0.00344816	0.0017604	0.0688669	0.00271005	0.0285616	0.131865	Lipid	Lactosylceramides
palmitoylcarnitine (C16)	0.0055874	0.000250117	0.0271793	-0.00162798	0.258522	0.472493	Lipid	Long-chain Acylcarnitine
margaroylcarnitine (C17)*	0.00655563	0.000160418	0.0271793	-0.000704778	0.64588	0.782108	Lipid	Long-chain Acylcarnitine
stearoylcarnitine (C18)	0.00696183	2.7847e-06	0.00272343	2.05737e-05	0.988466	0.990496	Lipid	Long-chain Acylcarnitine
linoleoylcarnitine (C18:2)*	0.00500872	0.00232297	0.0732858	0.00105919	0.43458	0.628284	Lipid	Long-chain Acylcarnitine
dihomo-linolenoylcarnitine (C20:3n3 or 6)*	0.00643926	0.000202699	0.0271793	0.00109367	0.478263	0.658795	Lipid	Long-chain Acylcarnitine
arachidonoylcarnitine (C20:4)	0.00550437	0.00223815	0.0732858	0.00106356	0.499397	0.669522	Lipid	Long-chain Acylcarnitine
arachidoylcarnitine (C20)*	0.00529006	0.00213437	0.0732858	0.000794768	0.581039	0.740097	Lipid	Long-chain Acylcarnitine
adrenoylcarnitine (C22:4)*	0.00608415	0.000776397	0.0474572	0.00116745	0.497886	0.669334	Lipid	Long-chain Acylcarnitine
lignoceroylcarnitine (C24)*	0.00550643	0.000178452	0.0271793	-0.000379168	0.784864	0.870486	Lipid	Long-chain Acylcarnitine
cerotoylcarnitine (C26)*	0.00545919	0.000530181	0.0404881	5.97632e-05	0.968788	0.981438	Lipid	Long-chain Acylcarnitine
1-(1-enyl-stearoyl)-GPE (P-18:0)*	0.00424316	0.0155286	0.171371	0.00526677	0.000179065	0.00997062	Lipid	Lysoplasmalogen
1-(1-enyl-palmitoyl)-GPC (P-16:0)*	0.00479444	0.0090163	0.133605	0.00614922	0.000137651	0.00997062	Lipid	Lysophosphatidylcholine
1-palmitoyl-GPC (16:0)	0.00284822	0.0184142	0.183233	0.00338489	0.00221134	0.042319	Lipid	Lysophosphatidylcholine
taurine	0.00464602	0.00329616	0.0895457	0.00337156	0.0190836	0.109596	Amino Acid	Methionine, Cysteine, SAM and Taurine Metabolism
S-methylcysteine	0.00402649	0.0126564	0.163957	0.00351672	0.010222	0.0791373	Amino Acid	Methionine, Cysteine, SAM and Taurine Metabolism
1-palmitoyl-2-stearoyl-GPC (16:0/18:0)	0.00289173	0.00327119	0.0895457	0.00159454	0.185021	0.384215	Lipid	Phosphatidylcholine
1-palmitoyl-2-oleoyl-GPI (16:0/18:1)*	0.00350395	0.0170638	0.175667	-0.00134075	0.435106	0.628284	Lipid	Phosphatidylinositol
1-stearoyl-2-arachidonoyl-GPI (18:0/20:4)	0.00284992	0.0160997	0.171371	0.000411722	0.744693	0.853411	Lipid	Phosphatidylinositol
phosphoethanolamine (PE)	0.00509667	0.0021354	0.0732858	0.00336842	0.0121305	0.0857922	Lipid	Phospholipid Metabolism
phosphocholine	0.00409794	0.00869075	0.130762	0.00253656	0.0311234	0.138705	Lipid	Phospholipid Metabolism
1-(1-enyl-stearoyl)-2-arachidonoyl-GPE (P-18:0/20:4)*	0.0065072	8.98062e-05	0.0271793	0.00567208	0.000101279	0.00988487	Lipid	Plasmalogen
1-(1-enyl-stearoyl)-2-linoleoyl-GPE (P-18:0/18:2)*	0.0050547	0.00138092	0.0587191	0.00521781	1.17215e-05	0.00381341	Lipid	Plasmalogen
1-(1-enyl-palmitoyl)-2-linoleoyl-GPE (P-16:0/18:2)*	0.00483331	0.00809672	0.127719	0.00716647	1.44555e-06	0.00141085	Lipid	Plasmalogen
1-(1-enyl-palmitoyl)-2-arachidonoyl-GPE (P-16:0/20:4)*	0.00442456	0.00171124	0.0688669	0.00445607	0.000183945	0.00997062	Lipid	Plasmalogen
1-(1-enyl-palmitoyl)-2-arachidonoyl-GPC (P-16:0/20:4)*	0.0039302	0.0111609	0.156463	0.00537837	7.78921e-05	0.00844697	Lipid	Plasmalogen
1-(1-enyl-palmitoyl)-2-linoleoyl-GPC (P-16:0/18:2)*	0.00350153	0.0270632	0.218742	0.00449472	0.00176113	0.0409254	Lipid	Plasmalogen
1-(1-enyl-palmitoyl)-2-palmitoyl-GPC (P-16:0/16:0)*	-0.238672	0.00112918	0.0587191	-0.238672	0.00112918	0.0306134	Lipid	Plasmalogen
hypoxanthine	0.00567686	0.00353443	0.0934235	0.000626785	0.681229	0.808855	Nucleotide	Purine Metabolism
uridine	0.00462835	0.000872657	0.0502034	0.00328453	0.00308708	0.0488171	Nucleotide	Pyrimidine Metabolism
isoursodeoxycholate	0.00828501	0.00372752	0.0946683	0.00915399	3.1197e-05	0.00560139	Lipid	Secondary Bile Acid Metabolism
ursodeoxycholate	0.00755662	0.00652849	0.112015	0.00429506	0.0598164	0.197901	Lipid	Secondary Bile Acid Metabolism
glycolithocholate	0.00580963	0.000579585	0.0404881	0.00431105	0.0180852	0.106333	Lipid	Secondary Bile Acid Metabolism
sphinganine-1-phosphate	0.00522354	0.00057037	0.0404881	0.00166322	0.155347	0.34303	Lipid	Sphingolipid Synthesis
tricosanoyl sphingomyelin (d18:1/23:0)*	0.00420843	0.0112997	0.156463	0.00410391	0.00257129	0.0432687	Lipid	Sphingomyelins
lignoceroyl sphingomyelin (d18:1/24:0)	0.00352515	0.0127726	0.163957	0.00381518	0.00354913	0.0517007	Lipid	Sphingomyelins
sphingomyelin (d18:1/21:0, d17:1/22:0, d16:1/23:0)*	0.00454889	0.0223127	0.198381	0.00430021	0.00501326	0.0568947	Lipid	Sphingomyelins
sphingomyelin (d18:1/20:0, d16:1/22:0)*	0.00271219	0.0445805	0.278363	0.00325771	0.00568188	0.0593912	Lipid	Sphingomyelins
palmitoyl sphingomyelin (d18:1/16:0)	0.00291252	0.0041966	0.0954483	0.0023577	0.00252892	0.0432687	Lipid	Sphingomyelins
sphingomyelin (d18:2/23:0, d18:1/23:1, d17:1/24:1)*	0.00440475	0.0149697	0.170365	0.00362688	0.00917309	0.0739912	Lipid	Sphingomyelins
sphingomyelin (d18:1/19:0, d19:1/18:0)*	0.00445484	0.0113588	0.156463	0.00315091	0.0262729	0.129164	Lipid	Sphingomyelins
sphingomyelin (d17:1/16:0, d18:1/15:0, d16:1/17:0)*	0.00426877	0.00600732	0.105817	0.00239196	0.0437916	0.16761	Lipid	Sphingomyelins
sphingomyelin (d18:1/17:0, d17:1/18:0, d19:1/16:0)	0.00393603	0.0116592	0.158371	0.00182501	0.135342	0.309352	Lipid	Sphingomyelins
sphingosine 1-phosphate	0.00462873	0.000466593	0.0404881	0.0024723	0.0164616	0.102991	Lipid	Sphingosines
alpha-tocopherol	0.0030535	0.00552185	0.105817	0.00191008	0.080891	0.231544	Cofactors and Vitamins	Tocopherol Metabolism
homoarginine	0.00567715	0.00287558	0.0827153	0.00533852	0.0039003	0.0531461	Amino Acid	Urea cycle; Arginine and Proline Metabolism
citrulline	0.00335654	0.0138206	0.163957	0.00276112	0.0149474	0.0959779	Amino Acid	Urea cycle; Arginine and Proline Metabolism
carotene diol (2)	0.00611069	0.00396871	0.0946683	0.00698061	0.000160806	0.00997062	Cofactors and Vitamins	Vitamin A Metabolism
carotene diol (1)	0.00594634	0.00455366	0.101215	0.00683141	0.000184864	0.00997062	Cofactors and Vitamins	Vitamin A Metabolism
caffeic acid sulfate	0.00608167	0.00226041	0.0732858	-0.000857559	0.665305	0.797713	Xenobiotics	Xanthine Metabolism
paraxanthine	0.00478421	0.00995905	0.143235	0.000848581	0.624516	0.768635	Xenobiotics	Xanthine Metabolism
glucuronate	-0.00437773	0.064707	0.328692	-0.00908969	4.28075e-05	0.00560139	Carbohydrate	Aminosugar Metabolism
gulonate*	-0.00542296	0.0228576	0.201394	-0.00589158	0.00456641	0.0531461	Cofactors and Vitamins	Ascorbate and Aldarate Metabolism
methyl-4-hydroxybenzoate sulfate	-0.00580755	0.0579473	0.323843	-0.00607905	0.0196317	0.109596	Xenobiotics	Benzoate Metabolism
cortisol 21-glucuronide	-0.00447761	0.0320923	0.243304	-0.00282908	0.145145	0.324911	Lipid	Corticosteroids
desmethylnaproxen	-0.00479558	0.0182044	0.183233	-0.00137696	0.418945	0.622875	Xenobiotics	Drug - Analgesics, Anesthetics
furosemide	-0.00593064	0.059776	0.3254	-0.00513121	0.0448242	0.168263	Xenobiotics	Drug - Cardiovascular
adipate	-0.00473937	0.0243746	0.20946	-0.00490785	0.00807864	0.0710338	Lipid	Fatty Acid, Dicarboxylate
alpha-ketoglutaramate*	-0.00233369	0.11534	0.410867	-0.00368555	0.0148941	0.0959779	Amino Acid	Glutamate Metabolism
N-acetyl-aspartyl-glutamate (NAAG)	-0.00459242	0.0329409	0.245338	-0.00527618	0.0107841	0.0791373	Amino Acid	Glutamate Metabolism
maltose	-0.00624658	0.00582769	0.105817	-0.00502581	0.00602622	0.05941	Carbohydrate	Glycogen Metabolism
maltotriose	-0.00702138	0.000718531	0.0468482	-0.00323259	0.0379756	0.155732	Carbohydrate	Glycogen Metabolism
N-acetylcarnosine	-0.00399408	0.0329222	0.245338	-0.00363436	0.0644257	0.203052	Amino Acid	Histidine Metabolism
hydantoin-5-propionic acid	-0.0067935	0.0152464	0.171371	-0.00498232	0.0626655	0.201444	Amino Acid	Histidine Metabolism
N6,N6,N6-trimethyllysine	-0.0034821	0.0367214	0.254779	-0.00468826	0.00253032	0.0432687	Amino Acid	Lysine Metabolism
5-(galactosylhydroxy)-L-lysine	-0.00373771	0.0673028	0.334123	-0.00481947	0.00617004	0.0595761	Amino Acid	Lysine Metabolism
pelargonate (9:0)	-0.00388556	0.0189001	0.184242	-0.000835869	0.435505	0.628284	Lipid	Medium Chain Fatty Acid
S-adenosylhomocysteine (SAH)	-0.00311916	0.0948131	0.379752	-0.00329715	0.0622496	0.201177	Amino Acid	Methionine, Cysteine, SAM and Taurine Metabolism
lanthionine	-0.00435639	0.0342848	0.251352	-0.00345847	0.0682124	0.210542	Amino Acid	Methionine, Cysteine, SAM and Taurine Metabolism
5-methylthioribose	-0.00421206	0.0437565	0.277882	-0.00401419	0.0357481	0.150389	Amino Acid	Methionine, Cysteine, SAM and Taurine Metabolism
2-oleoylglycerol (18:1)	-0.00529516	0.0267852	0.218299	-0.00335895	0.0758023	0.224812	Lipid	Monoacylglycerol
ribitol	-0.00285996	0.0996671	0.38076	-0.00432241	0.00196313	0.0417805	Carbohydrate	Pentose Metabolism
gluconate	-0.00643135	0.0492184	0.294442	-0.0103734	0.000353531	0.0162447	Carbohydrate	Pentose Metabolism
arabitol/xylitol	-0.00469552	0.0201876	0.188033	-0.00474093	0.00447569	0.0531461	Carbohydrate	Pentose Metabolism
1-oleoyl-2-linoleoyl-GPE (18:1/18:2)*	-0.00441623	0.0133602	0.163957	-0.00397289	0.0167826	0.103585	Lipid	Phosphatidylethanolamine
1-oleoyl-2-docosahexaenoyl-GPE (18:1/22:6)*	-0.00440267	0.0210288	0.19402	-0.00636711	0.000124318	0.00997062	Lipid	Phosphatidylethanolamine
(N(1) + N(8))-acetylspermidine	-0.00339775	0.053059	0.310729	-0.00418961	0.0190912	0.109596	Amino Acid	Polyamine Metabolism
N1,N12-diacetylspermine	-0.00565799	0.0385606	0.263722	-0.00522863	0.0291802	0.132561	Amino Acid	Polyamine Metabolism
glycochenodeoxycholate sulfate	-0.00465557	0.0493748	0.294442	-0.00812273	0.00770941	0.0690311	Lipid	Primary Bile Acid Metabolism
1-methyladenosine	-0.00211006	0.102667	0.38528	-0.00352996	0.00143265	0.0367966	Nucleotide	Purine Metabolism
N6-carbamoylthreonyladenosine	-0.00372717	0.0589666	0.3254	-0.00408252	0.0251146	0.12635	Nucleotide	Purine Metabolism
N6-succinyladenosine	-0.00501402	0.0139015	0.163957	-0.00528393	0.0078267	0.0694442	Nucleotide	Purine Metabolism
N-acetyl-beta-alanine	-0.00390281	0.0246461	0.20946	-0.00413718	0.0045148	0.0531461	Nucleotide	Pyrimidine Metabolism
cytidine	-0.00386957	0.0478524	0.288887	-0.00295468	0.0909524	0.248149	Nucleotide	Pyrimidine Metabolism
delta-CEHC glucuronide*	-0.00479558	0.0182044	0.183233	-0.00137696	0.418945	0.622875	Cofactors and Vitamins	Tocopherol Metabolism
gamma-CEHC glucuronide*	-0.00551398	0.0413296	0.27013	-0.00124641	0.599318	0.754754	Cofactors and Vitamins	Tocopherol Metabolism
N-acetyltryptophan	-0.0130114	0.0346781	0.251352	-0.0210564	0.000569018	0.0211196	Amino Acid	Tryptophan Metabolism
vanillactate	-0.00425682	0.0602326	0.3254	-0.00412385	0.171851	0.365092	Amino Acid	Tyrosine Metabolism
3-methoxytyramine sulfate	-0.00577765	0.0156652	0.171371	-0.00415989	0.0565243	0.192074	Amino Acid	Tyrosine Metabolism
homovanillate sulfate	-0.00688157	0.0294397	0.228508	-0.00579776	0.0217516	0.116646	Amino Acid	Tyrosine Metabolism
argininate*	-0.00382619	0.0390103	0.264945	-0.00191699	0.270312	0.484081	Amino Acid	Urea cycle; Arginine and Proline Metabolism
pyridoxate	-0.00771808	0.00863061	0.130762	0.000356984	0.887808	0.937771	Cofactors and Vitamins	Vitamin B6 Metabolism
valine	0.00133854	0.223309	0.537921	0.00267291	0.00345148	0.0517007	Amino Acid	BCAA Metabolism
carboxyethyl-GABA	-0.00162559	0.265039	0.572204	-0.00367119	0.011691	0.0845218	Amino Acid	Glutamate Metabolism
cysteinylglycine	-0.00478122	0.0400423	0.270079	-0.00578575	0.00299421	0.0488089	Amino Acid	Glutathione Metabolism
S-methylcysteine sulfoxide	0.00466888	0.0222542	0.198381	0.00446856	0.00901198	0.0739912	Amino Acid	Methionine, Cysteine, SAM and Taurine Metabolism
4-hydroxyphenylacetate	-0.00290447	0.278213	0.582008	-0.0063172	0.00594428	0.05941	Amino Acid	Phenylalanine Metabolism
N-acetylputrescine	-0.000913994	0.613231	0.815633	-0.00431828	0.0063686	0.0603471	Amino Acid	Polyamine Metabolism
5-methylthioadenosine (MTA)	-0.00183396	0.408485	0.685156	-0.0050115	0.00354186	0.0517007	Amino Acid	Polyamine Metabolism
4-acetamidobutanoate	-0.0024281	0.232083	0.548254	-0.00524695	0.0090335	0.0739912	Amino Acid	Polyamine Metabolism
N-acetyl-isoputreanine*	-0.00204066	0.328858	0.6294	-0.00604157	0.0035371	0.0517007	Amino Acid	Polyamine Metabolism
serotonin	0.00193444	0.447058	0.706337	0.00729258	0.000301438	0.0147102	Amino Acid	Tryptophan Metabolism
indolelactate	-0.00103183	0.553526	0.783772	-0.00479887	0.00588294	0.05941	Amino Acid	Tryptophan Metabolism
thyroxine	0.00263241	0.0826828	0.355071	0.00672747	2.3616e-05	0.00560139	Amino Acid	Tyrosine Metabolism
3-(4-hydroxyphenyl)lactate (HPLA)	-0.000995231	0.55393	0.783772	-0.00524802	0.00742282	0.0677072	Amino Acid	Tyrosine Metabolism
homovanillate (HVA)	-0.00351508	0.127366	0.423688	-0.00559916	0.0057745	0.0593912	Amino Acid	Tyrosine Metabolism
phenol glucuronide	0.00094549	0.672929	0.848099	-0.00538566	0.00652115	0.0611985	Amino Acid	Tyrosine Metabolism
vanillylmandelate (VMA)	-0.0042139	0.0782993	0.351269	-0.00665078	0.00574823	0.0593912	Amino Acid	Tyrosine Metabolism
arginine	0.00158266	0.281483	0.582008	0.00278501	0.0159586	0.10114	Amino Acid	Urea cycle; Arginine and Proline Metabolism
N-acetylglucosamine/N-acetylgalactosamine	-0.00159558	0.289186	0.590446	-0.00399663	0.00203317	0.0417805	Carbohydrate	Aminosugar Metabolism
fructose	0.000794735	0.576168	0.792236	0.00262238	0.0144504	0.0949424	Carbohydrate	Fructose, Mannose and Galactose Metabolism
nicotinamide riboside	-0.00227493	0.201879	0.525109	-0.00572725	0.00300055	0.0488089	Cofactors and Vitamins	Nicotinate and Nicotinamide Metabolism
alpha-ketoglutarate	-0.00232166	0.155951	0.470741	-0.00399323	0.0031016	0.0488171	Energy	TCA Cycle
androstenediol (3alpha, 17alpha) monosulfate (2)	0.00260576	0.250284	0.560132	0.0040919	0.00905879	0.0739912	Lipid	Androgenic Steroids
ceramide (d18:1/17:0, d17:1/18:0)*	0.000551373	0.749355	0.893785	-0.00501599	0.00119804	0.0316023	Lipid	Ceramides
N-stearoyl-sphingosine (d18:1/18:0)*	-0.00102127	0.566748	0.786212	-0.00508097	0.00107636	0.030015	Lipid	Ceramides
N-palmitoyl-sphingosine (d18:1/16:0)	-0.00119601	0.450763	0.711042	-0.00511195	0.000676806	0.022778	Lipid	Ceramides
N-stearoyl-sphingadienine (d18:2/18:0)*	-0.00175081	0.348666	0.641468	-0.00534246	0.000523651	0.0206345	Lipid	Ceramides
suberate (C8-DC)	-0.00330542	0.0693737	0.338532	-0.00504111	0.00596885	0.05941	Lipid	Fatty Acid, Dicarboxylate
heptenedioate (C7:1-DC)*	0.000571117	0.808501	0.929158	-0.00508772	0.009996	0.0786782	Lipid	Fatty Acid, Dicarboxylate
3-methyladipate	-0.00287423	0.17947	0.513785	-0.00623903	0.00375348	0.0531461	Lipid	Fatty Acid, Dicarboxylate
2-hydroxyadipate	-0.00257736	0.235637	0.550007	-0.00658526	0.00379387	0.0531461	Lipid	Fatty Acid, Dicarboxylate
3-hydroxyadipate*	-0.000722455	0.773723	0.906228	-0.00816793	0.0001941	0.00997062	Lipid	Fatty Acid, Dicarboxylate
2-hydroxynervonate*	-0.00139942	0.328606	0.6294	-0.00419558	0.00235761	0.0432687	Lipid	Fatty Acid, Monohydroxy
2-hydroxydecanoate	-0.00133723	0.446662	0.706337	-0.00498649	0.00149916	0.0375175	Lipid	Fatty Acid, Monohydroxy
arachidate (20:0)	-0.000485172	0.698049	0.861984	-0.00297294	0.00556744	0.0593912	Lipid	Long Chain Fatty Acid
oleate/vaccenate (18:1)	-6.03664e-05	0.970535	0.985247	-0.00364714	0.00500892	0.0568947	Lipid	Long Chain Fatty Acid
eicosenoate (20:1n9 or 1n11)	-0.000383404	0.824366	0.937567	-0.0038927	0.0057809	0.0593912	Lipid	Long Chain Fatty Acid
erucate (22:1n9)	-0.0015583	0.340495	0.636134	-0.00564105	3.72421e-05	0.00560139	Lipid	Long Chain Fatty Acid
malonylcarnitine (C3-DC)	-0.00214594	0.276082	0.580939	-0.00474679	0.00182366	0.0413929	Lipid	Short-chain Acylcarnitine
3-methyladipoylcarnitine (C7-DC)	-0.00207986	0.364963	0.650043	-0.00507503	0.0107162	0.0791373	Lipid	Short-chain Acylcarnitine
suberoylcarnitine (C8-DC)	-0.0044411	0.0788256	0.351672	-0.00675949	0.00405521	0.0531461	Lipid	Medium-chain Acylcarnitine
octadecanedioylcarnitine (C18-DC)*	-0.000988017	0.586713	0.795846	-0.00634343	0.00622619	0.0595761	Lipid	Long-chain Acylcarnitine
octadecenedioylcarnitine (C18:1-DC)*	-0.00309006	0.168883	0.501641	-0.00907945	0.00203861	0.0417805	Lipid	Long-chain Acylcarnitine
1-lignoceroyl-GPC (24:0)	0.00361334	0.0801327	0.353017	0.00539326	0.00157385	0.0384019	Lipid	Lysophosphatidylcholine
1-cerotoyl-GPC (26:0)*	0.00159262	0.371211	0.655116	0.0049265	0.000718236	0.0229728	Lipid	Lysophosphatidylcholine
2-palmitoyl-GPC* (16:0)*	0.00258603	0.115606	0.410867	0.00386433	0.00457405	0.0531461	Lipid	Lysophosphatidylcholine
1-stearoyl-GPC (18:0)	0.00234733	0.0909167	0.379752	0.00382925	0.00315111	0.0488171	Lipid	Lysophosphatidylcholine
1-(1-enyl-oleoyl)-GPE (P-18:1)*	0.00316113	0.0927948	0.379752	0.00472595	0.00168018	0.0399965	Lipid	Lysoplasmalogen
1-(1-enyl-palmitoyl)-GPE (P-16:0)*	0.00312239	0.0697124	0.338532	0.0044793	0.00106136	0.030015	Lipid	Lysoplasmalogen
3-hydroxy-3-methylglutarate	-0.00203836	0.293902	0.596341	-0.00452662	0.00705258	0.0649369	Lipid	Mevalonate Metabolism
1-oleoylglycerol (18:1)	-0.00230582	0.369721	0.65481	-0.00556676	0.00406289	0.0531461	Lipid	Monoacylglycerol
1-palmitoleoylglycerol (16:1)*	-0.00373938	0.149615	0.464504	-0.00636244	0.0020588	0.0417805	Lipid	Monoacylglycerol
1-palmitoyl-2-oleoyl-GPC (16:0/18:1)	7.19067e-06	0.994292	0.99531	-0.00243949	0.00985832	0.0782253	Lipid	Phosphatidylcholine
1-stearoyl-2-oleoyl-GPC (18:0/18:1)	-0.000932404	0.452619	0.711675	-0.00322018	0.00617416	0.0595761	Lipid	Phosphatidylcholine
1-palmitoyl-2-palmitoleoyl-GPC (16:0/16:1)*	-0.00093015	0.55755	0.78564	-0.00549954	0.000861944	0.0254926	Lipid	Phosphatidylcholine
1-oleoyl-2-arachidonoyl-GPE (18:1/20:4)*	-0.00224268	0.185178	0.520742	-0.0040726	0.00456258	0.0531461	Lipid	Phosphatidylethanolamine
1-palmitoyl-2-docosahexaenoyl-GPE (16:0/22:6)*	-0.00170157	0.330618	0.63096	-0.00435159	0.00243526	0.0432687	Lipid	Phosphatidylethanolamine
1-palmitoyl-2-oleoyl-GPE (16:0/18:1)	-0.00257298	0.167772	0.501641	-0.00486311	0.00417164	0.0531461	Lipid	Phosphatidylethanolamine
1-stearoyl-2-oleoyl-GPE (18:0/18:1)	-0.0024042	0.216137	0.532447	-0.00498868	0.0068145	0.0633424	Lipid	Phosphatidylethanolamine
glycerophosphorylcholine (GPC)	0.000954694	0.531207	0.778268	0.00375333	0.00446793	0.0531461	Lipid	Phospholipid Metabolism
docosapentaenoate (DPA; 22:5n3)	-0.000341956	0.855949	0.952998	-0.0039212	0.00898581	0.0739912	Lipid	Polyunsaturated Fatty Acid (n3 and n6)
eicosapentaenoate (EPA; 20:5n3)	-0.00332446	0.115375	0.410867	-0.00503614	0.0107139	0.0791373	Lipid	Polyunsaturated Fatty Acid (n3 and n6)
stearidonate (18:4n3)	-0.00342723	0.171879	0.505757	-0.00595898	0.00751164	0.0678829	Lipid	Polyunsaturated Fatty Acid (n3 and n6)
docosatrienoate (22:3n6)*	-0.000522921	0.812856	0.931974	-0.00765894	4.59131e-05	0.00560139	Lipid	Polyunsaturated Fatty Acid (n3 and n6)
glycocholate	-0.00323718	0.231494	0.548254	-0.00763023	0.00543306	0.0593912	Lipid	Primary Bile Acid Metabolism
glycocholate sulfate	-0.00613721	0.0416912	0.27013	-0.00930182	0.000528546	0.0206345	Lipid	Primary Bile Acid Metabolism
taurocholate	-0.00317015	0.294845	0.597012	-0.00980178	0.00214811	0.0419311	Lipid	Primary Bile Acid Metabolism
5alpha-pregnan-3beta,20alpha-diol monosulfate (2)	0.00234264	0.320305	0.619558	0.00454718	0.00431322	0.0531461	Lipid	Progestin Steroids
7-ketodeoxycholate	0.00262509	0.357902	0.644781	0.00550077	0.00058425	0.0211196	Lipid	Secondary Bile Acid Metabolism
3b-hydroxy-5-cholenoic acid	0.000850937	0.663484	0.843568	0.00459351	0.000753208	0.0229728	Lipid	Secondary Bile Acid Metabolism
sphingomyelin (d18:2/24:2)*	0.000524334	0.743428	0.88993	0.00589401	3.06007e-06	0.00149332	Lipid	Sphingomyelins
sphingomyelin (d18:1/22:2, d18:2/22:1, d16:1/24:2)*	0.000580499	0.679384	0.85009	0.00438218	0.000134732	0.00997062	Lipid	Sphingomyelins
sphingomyelin (d18:1/20:1, d18:2/20:0)*	0.00254288	0.0962236	0.379752	0.0038416	0.00235496	0.0432687	Lipid	Sphingomyelins
sphingomyelin (d18:1/22:1, d18:2/22:0, d16:1/24:1)*	0.00180981	0.191487	0.524578	0.0036175	0.000732829	0.0229728	Lipid	Sphingomyelins
sphingomyelin (d18:1/20:2, d18:2/20:1, d16:1/22:2)*	-0.00100174	0.517576	0.765793	0.00354574	0.00817182	0.0712116	Lipid	Sphingomyelins
sphingomyelin (d18:2/24:1, d18:1/24:2)*	0.00127717	0.303622	0.603187	0.00303789	0.00209759	0.0417805	Lipid	Sphingomyelins
inosine 5'-monophosphate (IMP)	0.0025617	0.182595	0.519121	0.00407941	0.00910765	0.0739912	Nucleotide	Purine Metabolism
7-methylguanine	0.000144166	0.916643	0.961885	-0.00415583	0.00203024	0.0417805	Nucleotide	Purine Metabolism
adenosine	-0.00226659	0.200282	0.525109	-0.00436943	0.0121139	0.0857922	Nucleotide	Purine Metabolism
pseudouridine	-0.00155268	0.323134	0.622097	-0.00359841	0.00896288	0.0739912	Nucleotide	Pyrimidine Metabolism
5,6-dihydrouridine	-0.00182593	0.285697	0.587	-0.00422537	0.00525731	0.0583084	Nucleotide	Pyrimidine Metabolism
2-hydroxyhippurate (salicylurate)	-0.00506563	0.229939	0.548254	-0.00812766	0.0144943	0.0949424	Xenobiotics	Benzoate Metabolism
salicyluric glucuronide*	-0.00548253	0.114311	0.410867	-0.00683701	0.0103043	0.0791373	Xenobiotics	Drug - Analgesics, Anesthetics
omeprazole	0.00114785	0.681005	0.85009	0.00611099	0.00435441	0.0531461	Xenobiotics	Drug - Gastrointestinal
allopurinol	0.000330857	0.667513	0.845632	0.00237856	0.00863647	0.0739912	Xenobiotics	Drug - Metabolic
hydroxypioglitazone (M-IV)	-0.00120353	0.238319	0.552522	0.000985849	0.00414459	0.0531461	Xenobiotics	Drug - Metabolic
levetiracetam	-0.000927992	0.582435	0.793344	0.00434339	0.00398709	0.0531461	Xenobiotics	Drug - Neurological
pregabalin	-0.000497034	0.475223	0.7324	0.000187777	0.00066885	0.022778	Xenobiotics	Drug - Neurological
quetiapine	4.49045e-05	0.955883	0.979931	0.00384768	0.0055872	0.0593912	Xenobiotics	Drug - Psychoactive
hydroxyasparagine	-0.00176807	0.280191	0.582008	-0.00314698	0.0360893	0.150526	Amino Acid	Alanine and Aspartate Metabolism
N-acetylaspartate (NAA)	-0.00350675	0.02991	0.23033	-0.00173806	0.0995145	0.258314	Amino Acid	Alanine and Aspartate Metabolism
aspartate	0.00147653	0.553759	0.783772	-0.00175013	0.136719	0.311043	Amino Acid	Alanine and Aspartate Metabolism
N-acetylalanine	-0.00104782	0.437045	0.704168	-0.00164848	0.172694	0.365617	Amino Acid	Alanine and Aspartate Metabolism
alanine	0.00288711	0.0361694	0.254681	0.000218821	0.836496	0.899141	Amino Acid	Alanine and Aspartate Metabolism
3-methylglutaconate	-0.00285256	0.207242	0.52645	-0.00442848	0.0267644	0.129164	Amino Acid	BCAA Metabolism
3-methyl-2-oxobutyrate	0.00213385	0.0605549	0.3254	0.00200834	0.0430539	0.167305	Amino Acid	BCAA Metabolism
methylsuccinate	-0.00174544	0.348347	0.641468	-0.00318785	0.054106	0.191331	Amino Acid	BCAA Metabolism
ethylmalonate	0.00131158	0.519309	0.76604	-0.00262659	0.107899	0.272822	Amino Acid	BCAA Metabolism
N-acetylvaline	-0.000205429	0.880952	0.959008	-0.00219842	0.101573	0.262263	Amino Acid	BCAA Metabolism
isobutyrylglycine (C4)	-0.00521697	0.0280031	0.222659	-0.00291589	0.104744	0.269026	Amino Acid	BCAA Metabolism
isovalerate (C5)	-0.0007108	0.724304	0.882153	0.00215886	0.12906	0.302794	Amino Acid	BCAA Metabolism
2,3-dihydroxy-2-methylbutyrate	-0.00209689	0.263725	0.570627	-0.00275966	0.156019	0.343735	Amino Acid	BCAA Metabolism
3-hydroxyisobutyrate	-0.000110864	0.94009	0.973435	-0.00172769	0.242549	0.451771	Amino Acid	BCAA Metabolism
alpha-hydroxyisocaproate	0.00260785	0.0571721	0.321347	0.00135276	0.317221	0.532888	Amino Acid	BCAA Metabolism
beta-hydroxyisovalerate	0.00058138	0.73557	0.887744	-0.00164556	0.29551	0.505995	Amino Acid	BCAA Metabolism
2-hydroxy-3-methylvalerate	-0.000340468	0.828386	0.937567	-0.00155249	0.348823	0.558732	Amino Acid	BCAA Metabolism
N-acetylisoleucine	0.000189482	0.890054	0.959479	-0.00107387	0.430598	0.628284	Amino Acid	BCAA Metabolism
alpha-hydroxyisovalerate	-7.37177e-05	0.968449	0.984556	-0.00058785	0.714056	0.830654	Amino Acid	BCAA Metabolism
3-hydroxy-2-ethylpropionate	0.00243277	0.0838665	0.355071	-0.000376111	0.793845	0.873148	Amino Acid	BCAA Metabolism
N-acetylleucine	-0.000101721	0.948841	0.977423	9.17877e-05	0.948832	0.975827	Amino Acid	BCAA Metabolism
creatinine	-0.00125151	0.376234	0.65837	-0.00209348	0.108983	0.274852	Amino Acid	Creatine Metabolism
creatine	-0.001192	0.433322	0.701638	-0.00242576	0.162194	0.349451	Amino Acid	Creatine Metabolism
beta-citrylglutamate	-0.00182177	0.351584	0.642131	-0.00415588	0.0134904	0.0920741	Amino Acid	Glutamate Metabolism
N-acetylglutamine	-0.0021044	0.296774	0.597012	-0.00360269	0.0490441	0.178909	Amino Acid	Glutamate Metabolism
citramalate	-0.00119664	0.531931	0.778268	-0.00263315	0.0965186	0.256222	Amino Acid	Glutamate Metabolism
N-acetylglutamate	0.000253874	0.892509	0.959479	-0.0026458	0.11137	0.276594	Amino Acid	Glutamate Metabolism
N-methyl-GABA	-0.00412541	0.202851	0.525109	-0.0014526	0.389439	0.593475	Amino Acid	Glutamate Metabolism
S-1-pyrroline-5-carboxylate	-0.000316312	0.829238	0.937567	0.000801258	0.540567	0.70663	Amino Acid	Glutamate Metabolism
pyroglutamine*	-0.00109297	0.582089	0.793344	0.00140368	0.497133	0.669244	Amino Acid	Glutamate Metabolism
glutamate	-0.000155091	0.920556	0.963642	-0.00095841	0.4484	0.634259	Amino Acid	Glutamate Metabolism
glutamine	0.00216702	0.058302	0.323974	0.000367619	0.706888	0.827819	Amino Acid	Glutamate Metabolism
4-hydroxyglutamate	-0.000164024	0.928438	0.964944	-7.30864e-05	0.962715	0.981438	Amino Acid	Glutamate Metabolism
5-oxoproline	0.00198422	0.380132	0.661512	-0.00220647	0.035002	0.14853	Amino Acid	Glutathione Metabolism
cys-gly, oxidized	-0.000186143	0.92372	0.963642	-0.00314813	0.0766474	0.226006	Amino Acid	Glutathione Metabolism
cysteine-glutathione disulfide	0.00435076	0.0504193	0.298849	0.00170973	0.403861	0.609225	Amino Acid	Glutathione Metabolism
2-hydroxybutyrate/2-hydroxyisobutyrate	0.00212934	0.142929	0.452376	5.07857e-05	0.966271	0.981438	Amino Acid	Glutathione Metabolism
cysteinylglycine disulfide*	0.00190494	0.210472	0.5278	-0.00020146	0.862928	0.921463	Amino Acid	Glutathione Metabolism
N-acetylserine	-0.00222553	0.17752	0.512139	-0.00246139	0.0832594	0.234859	Amino Acid	Glycine, Serine and Threonine Metabolism
N-acetylthreonine	-0.00143218	0.363418	0.648581	-0.00233859	0.111658	0.276594	Amino Acid	Glycine, Serine and Threonine Metabolism
glycine	0.000211805	0.887117	0.959479	-0.00159333	0.128902	0.302794	Amino Acid	Glycine, Serine and Threonine Metabolism
2-methylserine	0.00343213	0.0741575	0.346176	0.00151007	0.229037	0.435472	Amino Acid	Glycine, Serine and Threonine Metabolism
serine	0.00132028	0.346302	0.641468	0.000968337	0.331216	0.546058	Amino Acid	Glycine, Serine and Threonine Metabolism
allo-threonine	-0.0038189	0.0659788	0.331687	-0.00174101	0.283929	0.499209	Amino Acid	Glycine, Serine and Threonine Metabolism
N-acetylglycine	0.000816092	0.674851	0.849426	0.00105985	0.42259	0.624921	Amino Acid	Glycine, Serine and Threonine Metabolism
threonine	0.00196517	0.153682	0.465679	0.000661195	0.546736	0.710539	Amino Acid	Glycine, Serine and Threonine Metabolism
betaine	0.00208833	0.101398	0.38503	0.000532401	0.6786	0.807699	Amino Acid	Glycine, Serine and Threonine Metabolism
dimethylglycine	-0.000295093	0.860823	0.955125	0.000467475	0.740669	0.852468	Amino Acid	Glycine, Serine and Threonine Metabolism
sarcosine	-0.000965524	0.469921	0.729496	-0.000194371	0.87724	0.929626	Amino Acid	Glycine, Serine and Threonine Metabolism
1-methylguanidine	-0.00456547	0.0978503	0.379752	-0.00518217	0.0570632	0.192074	Amino Acid	Guanidino and Acetamido Metabolism
4-guanidinobutanoate	-0.00142058	0.413354	0.686659	-0.00218611	0.329261	0.546058	Amino Acid	Guanidino and Acetamido Metabolism
guanidinosuccinate	-0.00312276	0.266701	0.574022	-0.00233765	0.335222	0.548954	Amino Acid	Guanidino and Acetamido Metabolism
1-methyl-4-imidazoleacetate	0.000258956	0.897889	0.959897	-0.004501	0.0140016	0.0942453	Amino Acid	Histidine Metabolism
1-methylhistidine	-0.000426626	0.836902	0.944048	-0.00372927	0.0347235	0.148184	Amino Acid	Histidine Metabolism
imidazole lactate	-0.00311355	0.198687	0.525109	-0.00300376	0.0446664	0.168263	Amino Acid	Histidine Metabolism
imidazole propionate	-0.00218399	0.444517	0.706337	-0.00553592	0.0646147	0.203052	Amino Acid	Histidine Metabolism
N-acetylhistidine	-0.00358534	0.0945929	0.379752	-0.00262947	0.0980509	0.256562	Amino Acid	Histidine Metabolism
formiminoglutamate	-0.00284423	0.189022	0.520742	-0.00373377	0.0896771	0.245856	Amino Acid	Histidine Metabolism
N-acetyl-1-methylhistidine*	-0.00217064	0.420217	0.68949	-0.00400021	0.114095	0.27773	Amino Acid	Histidine Metabolism
1-ribosyl-imidazoleacetate*	-0.00206761	0.362905	0.648581	-0.00205615	0.229758	0.435472	Amino Acid	Histidine Metabolism
trans-urocanate	0.00137617	0.628105	0.828648	-0.00234379	0.350639	0.558732	Amino Acid	Histidine Metabolism
3-methylhistidine	0.00278605	0.252869	0.560784	-0.00199997	0.405246	0.61037	Amino Acid	Histidine Metabolism
cis-urocanate	0.00227981	0.420885	0.68949	-0.000847303	0.684792	0.811113	Amino Acid	Histidine Metabolism
histidine	-0.000276916	0.883433	0.959479	-0.000533105	0.545038	0.709276	Amino Acid	Histidine Metabolism
N-acetyl-3-methylhistidine*	-5.39519e-05	0.973578	0.98659	-6.86343e-05	0.973988	0.983364	Amino Acid	Histidine Metabolism
N-acetyl-cadaverine	0.00229055	0.388109	0.669437	-0.00462067	0.0405803	0.163663	Amino Acid	Lysine Metabolism
5-hydroxylysine	0.000160619	0.922549	0.963642	-0.00297904	0.0234676	0.120549	Amino Acid	Lysine Metabolism
5-aminovalerate	0.0023939	0.24967	0.560132	-0.00282698	0.13333	0.306853	Amino Acid	Lysine Metabolism
N6-acetyllysine	0.000186104	0.914576	0.961885	-0.00207567	0.132074	0.306722	Amino Acid	Lysine Metabolism
N2-acetyllysine	0.00121008	0.510544	0.759987	-0.00182007	0.275266	0.490255	Amino Acid	Lysine Metabolism
6-oxopiperidine-2-carboxylate	-0.00194911	0.398735	0.675681	-0.00185172	0.260899	0.473304	Amino Acid	Lysine Metabolism
N,N,N-trimethyl-5-aminovalerate	0.00244452	0.227193	0.545934	-0.00091676	0.568153	0.729504	Amino Acid	Lysine Metabolism
lysine	0.00174442	0.121532	0.414141	0.000267887	0.78131	0.870421	Amino Acid	Lysine Metabolism
pipecolate	-0.000701873	0.707015	0.870857	2.85244e-05	0.987907	0.990496	Amino Acid	Lysine Metabolism
cysteine	-0.00278287	0.0516739	0.30444	-0.0038266	0.0106864	0.0791373	Amino Acid	Methionine, Cysteine, SAM and Taurine Metabolism
cystathionine	-0.00387311	0.0711234	0.340974	-0.00455916	0.028664	0.131865	Amino Acid	Methionine, Cysteine, SAM and Taurine Metabolism
cystine	0.00369468	0.0458942	0.282293	0.0028568	0.0431195	0.167305	Amino Acid	Methionine, Cysteine, SAM and Taurine Metabolism
N-acetyltaurine	-0.00178593	0.404124	0.680263	-0.00298414	0.0432941	0.167305	Amino Acid	Methionine, Cysteine, SAM and Taurine Metabolism
N-methyltaurine	-0.00142171	0.30406	0.603187	0.00192348	0.114108	0.27773	Amino Acid	Methionine, Cysteine, SAM and Taurine Metabolism
methionine sulfoxide	-0.00215065	0.148794	0.464342	-0.00206916	0.260217	0.473068	Amino Acid	Methionine, Cysteine, SAM and Taurine Metabolism
S-methylmethionine	0.00355444	0.0350987	0.252401	0.00150958	0.282996	0.498586	Amino Acid	Methionine, Cysteine, SAM and Taurine Metabolism
N-formylmethionine	-0.000187563	0.901989	0.959897	-0.00122728	0.359413	0.568537	Amino Acid	Methionine, Cysteine, SAM and Taurine Metabolism
methionine sulfone	0.00338328	0.107841	0.396258	-0.00166909	0.367749	0.574277	Amino Acid	Methionine, Cysteine, SAM and Taurine Metabolism
N-acetylmethionine	0.00153418	0.475536	0.7324	0.0016248	0.361991	0.571688	Amino Acid	Methionine, Cysteine, SAM and Taurine Metabolism
cysteine s-sulfate	-0.00160567	0.419625	0.68949	-0.00126961	0.523582	0.691496	Amino Acid	Methionine, Cysteine, SAM and Taurine Metabolism
hypotaurine	0.00257702	0.198221	0.525109	-0.00111559	0.494755	0.667884	Amino Acid	Methionine, Cysteine, SAM and Taurine Metabolism
3-sulfo-L-alanine	0.000170915	0.916465	0.961885	0.000358495	0.804732	0.877563	Amino Acid	Methionine, Cysteine, SAM and Taurine Metabolism
cysteine sulfinic acid	0.000273554	0.850888	0.951556	-0.000365	0.762048	0.859837	Amino Acid	Methionine, Cysteine, SAM and Taurine Metabolism
alpha-ketobutyrate	0.000102165	0.950395	0.977423	0.000118789	0.930214	0.967898	Amino Acid	Methionine, Cysteine, SAM and Taurine Metabolism
methionine	-6.35008e-05	0.9644	0.984534	-0.000433061	0.759275	0.859837	Amino Acid	Methionine, Cysteine, SAM and Taurine Metabolism
phenyllactate (PLA)	-0.00015094	0.93134	0.966933	-0.00436695	0.0190513	0.109596	Amino Acid	Phenylalanine Metabolism
N-acetylphenylalanine	-0.00167489	0.385267	0.667795	-0.00313166	0.159488	0.347069	Amino Acid	Phenylalanine Metabolism
phenylacetate	0.0028043	0.209937	0.5278	0.0021862	0.258889	0.472493	Amino Acid	Phenylalanine Metabolism
phenylalanine	0.00118136	0.280573	0.582008	0.000875839	0.368682	0.574813	Amino Acid	Phenylalanine Metabolism
phenylpyruvate	0.00116722	0.474778	0.7324	-4.65235e-05	0.974296	0.983364	Amino Acid	Phenylalanine Metabolism
acisoga	-0.00129044	0.508278	0.759047	-0.0026634	0.133801	0.306853	Amino Acid	Polyamine Metabolism
spermidine	0.00349862	0.054889	0.315366	0.00144106	0.345518	0.556478	Amino Acid	Polyamine Metabolism
kynurenine	-0.000668111	0.662451	0.843568	-0.00366385	0.015711	0.100222	Amino Acid	Tryptophan Metabolism
picolinate	-0.00266311	0.231586	0.548254	-0.00507116	0.0346695	0.148184	Amino Acid	Tryptophan Metabolism
kynurenate	-0.00499606	0.0628656	0.327883	-0.00601077	0.0430168	0.167305	Amino Acid	Tryptophan Metabolism
tryptophan	0.00202735	0.0993603	0.38076	0.00157761	0.132976	0.30682	Amino Acid	Tryptophan Metabolism
N-acetylkynurenine (2)	-0.00461977	0.0623104	0.327883	-0.00495387	0.0975713	0.256222	Amino Acid	Tryptophan Metabolism
C-glycosyltryptophan	-0.00117214	0.522267	0.769243	-0.00219193	0.161623	0.348992	Amino Acid	Tryptophan Metabolism
indole-3-carboxylate	-5.07203e-05	0.975373	0.98659	0.00173026	0.241359	0.451771	Amino Acid	Tryptophan Metabolism
indoleacetylglutamine	-0.00286802	0.353903	0.644538	-0.00209982	0.369787	0.575617	Amino Acid	Tryptophan Metabolism
N-formylanthranilic acid	-0.00196056	0.252517	0.560784	-0.00156933	0.38596	0.58951	Amino Acid	Tryptophan Metabolism
3-indoxyl sulfate	0.000889441	0.72389	0.882153	-0.00125016	0.603356	0.757884	Amino Acid	Tryptophan Metabolism
indoleacetate	0.000135704	0.947935	0.977423	-0.00115785	0.510534	0.680209	Amino Acid	Tryptophan Metabolism
xanthurenate	-0.000782072	0.740169	0.889055	-0.00105233	0.639184	0.77786	Amino Acid	Tryptophan Metabolism
indolepropionate	0.00163118	0.445951	0.706337	0.00110222	0.691847	0.816497	Amino Acid	Tryptophan Metabolism
tryptophan betaine	-0.000263306	0.923567	0.963642	-0.000625716	0.852008	0.911798	Amino Acid	Tryptophan Metabolism
4-hydroxyphenylacetatoylcarnitine	0.00205717	0.545769	0.783772	-0.00608912	0.0086938	0.0739912	Amino Acid	Tyrosine Metabolism
tyramine O-sulfate	-0.00411827	0.232047	0.548254	-0.00621245	0.0169811	0.103585	Amino Acid	Tyrosine Metabolism
5-hydroxymethyl-2-furoic acid	0.00241715	0.238787	0.552522	-0.00358976	0.0266822	0.129164	Amino Acid	Tyrosine Metabolism
N-acetyltyrosine	-0.00342193	0.0729339	0.346176	-0.00527365	0.0339091	0.14709	Amino Acid	Tyrosine Metabolism
2-hydroxyphenylacetate	-0.00319008	0.118416	0.410867	-0.00375049	0.0549134	0.192074	Amino Acid	Tyrosine Metabolism
gentisate	0.00306854	0.190671	0.523811	-0.00303934	0.0923675	0.249725	Amino Acid	Tyrosine Metabolism
phenol sulfate	0.00396002	0.125748	0.419733	-0.00403796	0.0746837	0.222909	Amino Acid	Tyrosine Metabolism
indoxyl glucuronide	-0.00140043	0.558584	0.78564	-0.00419612	0.0964584	0.256222	Amino Acid	Tyrosine Metabolism
4-methoxyphenol sulfate	0.00305896	0.259897	0.568522	-0.00244733	0.166079	0.356248	Amino Acid	Tyrosine Metabolism
N-formylphenylalanine	-0.00515888	0.0410221	0.27013	-0.00274812	0.19589	0.397797	Amino Acid	Tyrosine Metabolism
3-hydroxyphenylacetate sulfate	-0.00209303	0.258207	0.566202	-0.00131264	0.384295	0.587886	Amino Acid	Tyrosine Metabolism
3-methoxytyrosine	0.00114183	0.551966	0.783772	0.00225801	0.305327	0.520068	Amino Acid	Tyrosine Metabolism
3,4-dihydroxyphenylacetate sulfate	-0.00242873	0.318202	0.618776	-0.000701647	0.645729	0.782108	Amino Acid	Tyrosine Metabolism
4-hydroxyphenylpyruvate	0.00267339	0.13265	0.431611	0.000819143	0.616306	0.765063	Amino Acid	Tyrosine Metabolism
vanillic alcohol sulfate	-0.0016862	0.631863	0.829479	0.00155951	0.567297	0.729489	Amino Acid	Tyrosine Metabolism
dopamine 3-O-sulfate	-0.00234747	0.321116	0.619558	-0.000799923	0.664253	0.79743	Amino Acid	Tyrosine Metabolism
dopamine 4-sulfate	-0.00288587	0.193006	0.524889	-0.000543472	0.784645	0.870486	Amino Acid	Tyrosine Metabolism
p-cresol glucuronide*	-0.00280269	0.347871	0.641468	0.000772413	0.772783	0.866938	Amino Acid	Tyrosine Metabolism
tyrosine	0.00252703	0.0273659	0.219376	-0.000293376	0.796421	0.873148	Amino Acid	Tyrosine Metabolism
prolylhydroxyproline	-0.0027526	0.0812196	0.354611	-0.00348098	0.0193451	0.109596	Amino Acid	Urea cycle; Arginine and Proline Metabolism
urea	-0.0028816	0.101572	0.38503	-0.00342296	0.0268651	0.129164	Amino Acid	Urea cycle; Arginine and Proline Metabolism
3-hydroxyproline	-0.00152089	0.244349	0.552709	-0.0021284	0.0414013	0.166287	Amino Acid	Urea cycle; Arginine and Proline Metabolism
N-methylhydroxyproline	-0.005385	0.340077	0.636134	-0.00778904	0.0795068	0.229582	Amino Acid	Urea cycle; Arginine and Proline Metabolism
ornithine	0.00115886	0.37792	0.658833	0.00147239	0.148892	0.331777	Amino Acid	Urea cycle; Arginine and Proline Metabolism
hydroxyproline	0.000827181	0.57046	0.786897	-0.00221222	0.0840712	0.235786	Amino Acid	Urea cycle; Arginine and Proline Metabolism
N-delta-acetylornithine	-0.000501826	0.815082	0.932781	0.0028482	0.0929942	0.250034	Amino Acid	Urea cycle; Arginine and Proline Metabolism
N-acetylarginine	0.00170134	0.387679	0.669437	0.00218226	0.132371	0.306722	Amino Acid	Urea cycle; Arginine and Proline Metabolism
N-methylproline	-0.000693739	0.78751	0.917368	-0.00326106	0.149754	0.332182	Amino Acid	Urea cycle; Arginine and Proline Metabolism
homocitrulline	0.000370696	0.870457	0.955125	-0.00200898	0.286659	0.500717	Amino Acid	Urea cycle; Arginine and Proline Metabolism
dimethylarginine (ADMA + SDMA)	-0.000102522	0.940589	0.973435	-0.000968149	0.396588	0.60104	Amino Acid	Urea cycle; Arginine and Proline Metabolism
proline	0.00201673	0.152741	0.465679	0.000911008	0.438871	0.629909	Amino Acid	Urea cycle; Arginine and Proline Metabolism
N-acetylproline	0.000815782	0.686275	0.855002	-0.00111145	0.498993	0.669522	Amino Acid	Urea cycle; Arginine and Proline Metabolism
N-acetylcitrulline	-0.00405431	0.083038	0.355071	-0.00109484	0.635812	0.775641	Amino Acid	Urea cycle; Arginine and Proline Metabolism
N2,N5-diacetylornithine	-0.000729907	0.761099	0.900066	0.000925402	0.672829	0.804598	Amino Acid	Urea cycle; Arginine and Proline Metabolism
2-oxoarginine*	-0.00121109	0.494576	0.747596	-0.000259034	0.87181	0.926892	Amino Acid	Urea cycle; Arginine and Proline Metabolism
N6-carboxymethyllysine	-0.0010845	0.589769	0.797779	-0.00240751	0.159666	0.347069	Carbohydrate	Advanced Glycation End-product
N-acetylneuraminate	-0.00256159	0.147187	0.461374	-0.00402747	0.0167605	0.103585	Carbohydrate	Aminosugar Metabolism
erythronate*	-0.00159895	0.346284	0.641468	-0.00348861	0.0241014	0.123157	Carbohydrate	Aminosugar Metabolism
N-acetylglucosaminylasparagine	-0.0030903	0.118485	0.410867	-0.00171303	0.308761	0.525001	Carbohydrate	Aminosugar Metabolism
sucrose	-0.00155524	0.554231	0.783772	-0.00242899	0.342822	0.553965	Carbohydrate	Disaccharides and Oligosaccharides
mannitol/sorbitol	-0.00194551	0.510091	0.759987	-0.00541854	0.0260006	0.128815	Carbohydrate	Fructose, Mannose and Galactose Metabolism
mannose	-0.00230105	0.0988888	0.38076	0.00116625	0.238925	0.449307	Carbohydrate	Fructose, Mannose and Galactose Metabolism
galactonate	0.000137104	0.950524	0.977423	0.000938734	0.636566	0.775641	Carbohydrate	Fructose, Mannose and Galactose Metabolism
maltotetraose	-0.00255819	0.202035	0.525109	-0.00268713	0.117483	0.284523	Carbohydrate	Glycogen Metabolism
1,5-anhydroglucitol (1,5-AG)	0.00358114	0.0699217	0.338532	0.00372296	0.0717283	0.217413	Carbohydrate	Glycolysis, Gluconeogenesis, and Pyruvate Metabolism
2,3-diphosphoglycerate	-9.06045e-05	0.892341	0.959479	-0.000499003	0.218814	0.424578	Carbohydrate	Glycolysis, Gluconeogenesis, and Pyruvate Metabolism
glucose	-0.000118753	0.907951	0.961013	0.000398431	0.615652	0.765063	Carbohydrate	Glycolysis, Gluconeogenesis, and Pyruvate Metabolism
pyruvate	0.0032822	0.00692351	0.11429	-0.000339639	0.760728	0.859837	Carbohydrate	Glycolysis, Gluconeogenesis, and Pyruvate Metabolism
glycerate	-0.000457077	0.729482	0.884057	-0.000190362	0.855375	0.914398	Carbohydrate	Glycolysis, Gluconeogenesis, and Pyruvate Metabolism
ribonate (ribonolactone)	-0.00228462	0.141526	0.450854	-0.00372767	0.0107165	0.0791373	Carbohydrate	Pentose Metabolism
arabonate/xylonate	-0.00222593	0.246943	0.556476	-0.00367111	0.0275321	0.130443	Carbohydrate	Pentose Metabolism
sedoheptulose	0.000258941	0.892295	0.959479	-0.00279015	0.106744	0.271308	Carbohydrate	Pentose Metabolism
ribulonate/xylulonate*	-0.00322686	0.108586	0.396258	-0.00192531	0.208864	0.412654	Carbohydrate	Pentose Metabolism
arabinose	0.00177084	0.28327	0.583281	-0.00132417	0.31952	0.535827	Carbohydrate	Pentose Metabolism
xylose	0.00183102	0.214277	0.532447	-0.000585398	0.674346	0.804598	Carbohydrate	Pentose Metabolism
threonate	-0.00253733	0.131279	0.429401	-0.00247324	0.0800875	0.230576	Cofactors and Vitamins	Ascorbate and Aldarate Metabolism
oxalate (ethanedioate)	-0.00214807	0.187688	0.520742	-0.00217976	0.082961	0.234695	Cofactors and Vitamins	Ascorbate and Aldarate Metabolism
biliverdin	-0.00100173	0.560777	0.78564	-0.00369553	0.0530316	0.188214	Cofactors and Vitamins	Hemoglobin and Porphyrin Metabolism
bilirubin	0.00076162	0.64829	0.836099	-0.00320682	0.0652676	0.203052	Cofactors and Vitamins	Hemoglobin and Porphyrin Metabolism
bilirubin (E,Z or Z,E)*	0.000618862	0.694859	0.85913	-0.00322017	0.0964619	0.256222	Cofactors and Vitamins	Hemoglobin and Porphyrin Metabolism
bilirubin (E,E)*	0.00110036	0.530772	0.778268	-0.00172879	0.281619	0.497935	Cofactors and Vitamins	Hemoglobin and Porphyrin Metabolism
heme	0.00115708	0.670018	0.846611	0.00165936	0.43151	0.628284	Cofactors and Vitamins	Hemoglobin and Porphyrin Metabolism
D-urobilin	0.0014467	0.555372	0.783772	-0.00165278	0.485698	0.662995	Cofactors and Vitamins	Hemoglobin and Porphyrin Metabolism
L-urobilin	-0.00346113	0.267642	0.574022	0.00127119	0.674274	0.804598	Cofactors and Vitamins	Hemoglobin and Porphyrin Metabolism
I-urobilinogen	0.0032732	0.217403	0.532853	-8.41679e-05	0.970377	0.981438	Cofactors and Vitamins	Hemoglobin and Porphyrin Metabolism
quinolinate	-0.00253117	0.347007	0.641468	-0.00584188	0.0305313	0.13732	Cofactors and Vitamins	Nicotinate and Nicotinamide Metabolism
1-methylnicotinamide	-0.00112601	0.584401	0.793812	-0.0037678	0.0416724	0.166324	Cofactors and Vitamins	Nicotinate and Nicotinamide Metabolism
N1-Methyl-2-pyridone-5-carboxamide	-0.0023197	0.252772	0.560784	-0.00194032	0.242182	0.451771	Cofactors and Vitamins	Nicotinate and Nicotinamide Metabolism
nicotinamide	-0.000233943	0.905301	0.961013	0.00135808	0.380418	0.58504	Cofactors and Vitamins	Nicotinate and Nicotinamide Metabolism
trigonelline (N'-methylnicotinate)	0.00357578	0.291346	0.593618	-0.000892448	0.756748	0.859837	Cofactors and Vitamins	Nicotinate and Nicotinamide Metabolism
pantothenate (Vitamin B5)	-0.000644664	0.71608	0.879393	-0.00177591	0.209829	0.413724	Cofactors and Vitamins	Pantothenate and CoA Metabolism
riboflavin (Vitamin B2)	0.00142692	0.423965	0.693374	0.000978702	0.554894	0.719225	Cofactors and Vitamins	Riboflavin Metabolism
thiamin (Vitamin B1)	-0.00337376	0.253796	0.561568	0.00231163	0.219386	0.424842	Cofactors and Vitamins	Thiamine Metabolism
gamma-CEHC	-0.000846916	0.701002	0.864539	0.00358618	0.0341125	0.147318	Cofactors and Vitamins	Tocopherol Metabolism
alpha-CEHC sulfate	-0.0049342	0.10774	0.396258	-0.00529996	0.0692756	0.211291	Cofactors and Vitamins	Tocopherol Metabolism
alpha-CEHC glucuronide*	-0.00406824	0.129859	0.429061	-0.00228303	0.322893	0.53963	Cofactors and Vitamins	Tocopherol Metabolism
gamma-CEHC sulfate*	-0.00139557	0.409132	0.685156	-0.00109043	0.590193	0.746151	Cofactors and Vitamins	Tocopherol Metabolism
gamma-tocopherol/beta-tocopherol	-0.000412537	0.822507	0.937567	0.000406955	0.752425	0.859837	Cofactors and Vitamins	Tocopherol Metabolism
carotene diol (3)	0.00449966	0.0478149	0.288887	0.00422429	0.0244106	0.123444	Cofactors and Vitamins	Vitamin A Metabolism
beta-cryptoxanthin	0.00208155	0.416281	0.686659	0.00242127	0.263614	0.475577	Cofactors and Vitamins	Vitamin A Metabolism
retinol (Vitamin A)	0.000570275	0.739997	0.889055	0.00153	0.32665	0.544044	Cofactors and Vitamins	Vitamin A Metabolism
pyridoxal	-0.000822135	0.640379	0.836099	0.00202679	0.115359	0.280074	Cofactors and Vitamins	Vitamin B6 Metabolism
pyridoxine (Vitamin B6)	-0.000559691	0.188577	0.520742	0.000381944	0.201769	0.402713	Cofactors and Vitamins	Vitamin B6 Metabolism
phosphate	-0.000100546	0.909519	0.961632	-0.00165585	0.0475909	0.17551	Energy	Oxidative Phosphorylation
succinate	-0.00118528	0.507001	0.759047	-0.00271212	0.0508465	0.182449	Energy	TCA Cycle
aconitate [cis or trans]	6.51767e-07	0.999667	0.999667	-0.00260996	0.0745344	0.222909	Energy	TCA Cycle
2-methylcitrate/homocitrate	-0.00395404	0.102711	0.38528	-0.00277275	0.175559	0.370077	Energy	TCA Cycle
citrate	0.000559815	0.720421	0.880714	-0.00144343	0.290675	0.501943	Energy	TCA Cycle
fumarate	0.000258562	0.901963	0.959897	-0.000507806	0.788121	0.872659	Energy	TCA Cycle
malate	-0.00047221	0.826268	0.937567	-6.94434e-05	0.969055	0.981438	Energy	TCA Cycle
5alpha-androstan-3beta,17alpha-diol disulfate	-0.00285764	0.196665	0.525109	0.00579756	0.0223237	0.117775	Lipid	Androgenic Steroids
androstenediol (3alpha, 17alpha) monosulfate (3)	0.0026907	0.269799	0.576121	0.00524881	0.0196023	0.109596	Lipid	Androgenic Steroids
epiandrosterone sulfate	0.00375909	0.199237	0.525109	0.00524378	0.0421471	0.166867	Lipid	Androgenic Steroids
dehydroisoandrosterone sulfate (DHEA-S)	0.00497467	0.0346959	0.251352	0.00365992	0.0722797	0.218406	Lipid	Androgenic Steroids
androstenediol (3beta,17beta) monosulfate (1)	0.00383672	0.121233	0.414141	0.00397552	0.0849035	0.237361	Lipid	Androgenic Steroids
5alpha-androstan-3beta,17beta-diol monosulfate (2)	0.00104641	0.60674	0.811753	0.0032039	0.104541	0.269026	Lipid	Androgenic Steroids
5alpha-androstan-3alpha,17beta-diol disulfate	-0.00390723	0.119283	0.410867	-0.00400133	0.133934	0.306853	Lipid	Androgenic Steroids
5alpha-androstan-3alpha,17beta-diol monosulfate (1)	0.000408028	0.87874	0.959008	0.00328785	0.166737	0.356407	Lipid	Androgenic Steroids
andro steroid monosulfate C19H28O6S (1)*	-0.000727731	0.766175	0.903884	-0.00294903	0.171111	0.364638	Lipid	Androgenic Steroids
androsterone sulfate	0.00484234	0.125499	0.419733	0.00310462	0.192223	0.394526	Lipid	Androgenic Steroids
androstenediol (3beta,17beta) disulfate (1)	0.00177224	0.445614	0.706337	-0.00242322	0.197688	0.398644	Lipid	Androgenic Steroids
androstenediol (3beta,17beta) disulfate (2)	0.00142062	0.487483	0.743773	-0.0015462	0.364378	0.571756	Lipid	Androgenic Steroids
5alpha-androstan-3alpha,17beta-diol monosulfate (2)	0.000602944	0.0806661	0.353773	0.00183179	0.283009	0.498586	Lipid	Androgenic Steroids
16a-hydroxy DHEA 3-sulfate	0.000418461	0.86285	0.955125	-0.00164717	0.395196	0.599863	Lipid	Androgenic Steroids
androstenediol (3beta,17beta) monosulfate (2)	0.00509882	0.0413228	0.27013	0.00114594	0.534325	0.701885	Lipid	Androgenic Steroids
etiocholanolone glucuronide	-0.00180261	0.548635	0.783772	-0.000509122	0.817745	0.884832	Lipid	Androgenic Steroids
5alpha-androstan-3beta,17beta-diol disulfate	0.00107849	0.640853	0.836099	-0.000396893	0.847273	0.909344	Lipid	Androgenic Steroids
11-ketoetiocholanolone glucuronide	-0.00314741	0.222584	0.5375	0.000651912	0.721918	0.836808	Lipid	Androgenic Steroids
androsterone glucuronide	-0.0038989	0.17054	0.503893	0.000147358	0.952182	0.977432	Lipid	Androgenic Steroids
methylmalonate (MMA)	-0.00133715	0.494503	0.747596	-0.00428769	0.0169653	0.103585	Lipid	BCAA Metabolism
propionylglycine (C3)	-0.0023385	0.235242	0.550007	-0.000184975	0.902316	0.945175	Lipid	BCAA Metabolism
carnitine	-0.000897637	0.582013	0.793344	-0.00306262	0.0142759	0.0949424	Lipid	Carnitine Metabolism
deoxycarnitine	-0.00152759	0.331609	0.63096	-0.00339069	0.017447	0.104954	Lipid	Carnitine Metabolism
N-palmitoyl-sphingadienine (d18:2/16:0)*	-0.000430988	0.751314	0.893899	-0.00307566	0.0195689	0.109596	Lipid	Ceramides
ceramide (d16:1/24:1, d18:1/22:1)*	-0.000487696	0.75911	0.89989	-0.00304396	0.0287779	0.131865	Lipid	Ceramides
N-palmitoyl-heptadecasphingosine (d17:1/16:0)*	0.00093651	0.554488	0.783772	-0.00325354	0.0299096	0.135147	Lipid	Ceramides
ceramide (d18:1/20:0, d16:1/22:0, d20:1/18:0)*	-0.000267079	0.86166	0.955125	-0.00283923	0.0437081	0.16761	Lipid	Ceramides
ceramide (d18:2/24:1, d18:1/24:2)*	-0.000865818	0.569419	0.78657	-0.00222272	0.0993043	0.258314	Lipid	Ceramides
ceramide (d18:1/14:0, d16:1/16:0)*	-0.000359512	0.822779	0.937567	-0.00221358	0.113762	0.27773	Lipid	Ceramides
N-behenoyl-sphingadienine (d18:2/22:0)*	-0.000237928	0.881542	0.959008	-0.00112816	0.424102	0.625262	Lipid	Ceramides
cortisone	0.00384436	0.0361813	0.254681	0.00193683	0.181509	0.377724	Lipid	Corticosteroids
cortisol	-0.000250777	0.885209	0.959479	0.000193457	0.883761	0.935522	Lipid	Corticosteroids
stearoyl-arachidonoyl-glycerol (18:0/20:4) [1]*	0.0020183	0.239002	0.552522	-0.0030067	0.0470043	0.174434	Lipid	Diacylglycerol
palmitoyl-linoleoyl-glycerol (16:0/18:2) [1]*	0.00225327	0.235572	0.550007	0.00239468	0.126954	0.301477	Lipid	Diacylglycerol
oleoyl-oleoyl-glycerol (18:1/18:1) [2]*	0.00201322	0.242929	0.552522	-0.00217735	0.140607	0.316934	Lipid	Diacylglycerol
diacylglycerol (14:0/18:1, 16:0/16:1) [2]*	0.00211187	0.298907	0.597012	-0.00215039	0.21317	0.416498	Lipid	Diacylglycerol
oleoyl-oleoyl-glycerol (18:1/18:1) [1]*	0.0018497	0.260758	0.568522	-0.00177067	0.213317	0.416498	Lipid	Diacylglycerol
linoleoyl-arachidonoyl-glycerol (18:2/20:4) [1]*	0.00232545	0.228193	0.546992	0.00189911	0.240499	0.451398	Lipid	Diacylglycerol
palmitoyl-linoleoyl-glycerol (16:0/18:2) [2]*	0.00166329	0.337158	0.635194	0.00155177	0.284385	0.499209	Lipid	Diacylglycerol
palmitoyl-arachidonoyl-glycerol (16:0/20:4) [2]*	0.00353082	0.0715781	0.34148	0.00179608	0.286784	0.500717	Lipid	Diacylglycerol
diacylglycerol (14:0/18:1, 16:0/16:1) [1]*	0.00265591	0.188509	0.520742	-0.0015704	0.365011	0.571831	Lipid	Diacylglycerol
linoleoyl-linoleoyl-glycerol (18:2/18:2) [1]*	-0.000438682	0.815468	0.932781	0.0014009	0.384247	0.587886	Lipid	Diacylglycerol
oleoyl-linoleoyl-glycerol (18:1/18:2) [1]	0.00142831	0.373636	0.656043	0.00109928	0.431231	0.628284	Lipid	Diacylglycerol
palmitoleoyl-arachidonoyl-glycerol (16:1/20:4) [2]*	0.00253059	0.229999	0.548254	0.00126242	0.469382	0.653519	Lipid	Diacylglycerol
palmitoyl-oleoyl-glycerol (16:0/18:1) [2]*	0.00291473	0.0958546	0.379752	-0.00111262	0.462416	0.648781	Lipid	Diacylglycerol
oleoyl-linoleoyl-glycerol (18:1/18:2) [2]	0.00135607	0.412399	0.686659	0.000998093	0.481134	0.66046	Lipid	Diacylglycerol
palmitoyl-oleoyl-glycerol (16:0/18:1) [1]*	0.00277601	0.11532	0.410867	-0.00106724	0.473396	0.655367	Lipid	Diacylglycerol
linoleoyl-linolenoyl-glycerol (18:2/18:3) [2]*	-0.000443723	0.819563	0.93637	0.00104671	0.515757	0.685404	Lipid	Diacylglycerol
oleoyl-linolenoyl-glycerol (18:1/18:3) [2]*	-0.00202861	0.272709	0.577294	0.000945952	0.549661	0.71339	Lipid	Diacylglycerol
linoleoyl-arachidonoyl-glycerol (18:2/20:4) [2]*	0.00235089	0.207215	0.52645	0.000798497	0.622343	0.767529	Lipid	Diacylglycerol
palmitoleoyl-linoleoyl-glycerol (16:1/18:2) [1]*	0.00133328	0.456802	0.717099	0.000811643	0.58358	0.740669	Lipid	Diacylglycerol
diacylglycerol (16:1/18:2 [2], 16:0/18:3 [1])*	-0.000170586	0.925215	0.963642	-0.000586376	0.703525	0.827075	Lipid	Diacylglycerol
oleoyl-arachidonoyl-glycerol (18:1/20:4) [1]*	0.00311404	0.0835879	0.355071	-0.000571915	0.71296	0.830369	Lipid	Diacylglycerol
palmitoyl-palmitoyl-glycerol (16:0/16:0) [2]*	0.00343497	0.104773	0.388135	-0.000466357	0.795067	0.873148	Lipid	Diacylglycerol
oleoyl-arachidonoyl-glycerol (18:1/20:4) [2]*	0.00335989	0.0689501	0.338532	-0.000144281	0.927892	0.967546	Lipid	Diacylglycerol
palmitoyl-arachidonoyl-glycerol (16:0/20:4) [1]*	0.00472119	0.0246283	0.20946	-6.25158e-05	0.970189	0.981438	Lipid	Diacylglycerol
stearoyl-arachidonoyl-glycerol (18:0/20:4) [2]*	0.00395356	0.0163287	0.171715	0.000103641	0.944677	0.974774	Lipid	Diacylglycerol
N-palmitoyl-sphinganine (d18:0/16:0)	0.000489802	0.772415	0.905798	-0.00347452	0.0359689	0.150526	Lipid	Dihydroceramides
N-stearoyl-sphinganine (d18:0/18:0)*	0.0016778	0.399094	0.675681	-0.0033103	0.0636103	0.203052	Lipid	Dihydroceramides
palmitoyl dihydrosphingomyelin (d18:0/16:0)*	0.00292799	0.0248439	0.20946	0.00244557	0.0272148	0.129569	Lipid	Dihydrosphingomyelins
myristoyl dihydrosphingomyelin (d18:0/14:0)*	0.00178739	0.262714	0.5697	0.00238864	0.0565045	0.192074	Lipid	Dihydrosphingomyelins
sphingomyelin (d18:0/18:0, d19:0/17:0)*	0.00359112	0.0597597	0.3254	0.000762744	0.629771	0.771212	Lipid	Dihydrosphingomyelins
leukotriene B4	-0.00165488	0.391446	0.674003	0.000405294	0.795469	0.873148	Lipid	Eicosanoid
N-oleoylserine	0.00227241	0.13647	0.441693	-0.00186286	0.109925	0.275792	Lipid	Endocannabinoid
N-oleoyltaurine	0.00162241	0.392745	0.675051	-0.00167942	0.29097	0.501943	Lipid	Endocannabinoid
N-stearoyltaurine	0.00127263	0.394727	0.675681	0.00106115	0.47162	0.653837	Lipid	Endocannabinoid
linoleoyl ethanolamide	0.000293568	0.866596	0.955125	0.000183605	0.900971	0.945175	Lipid	Endocannabinoid
N-palmitoylserine	0.00050376	0.758052	0.899727	3.20993e-05	0.982345	0.988706	Lipid	Endocannabinoid
estrone 3-sulfate	-0.00189769	0.241118	0.552522	-0.00369848	0.0505325	0.181992	Lipid	Estrogenic Steroids
arachidonoylcholine	0.000640134	0.74939	0.893785	0.00375988	0.0399417	0.162429	Lipid	Fatty Acid Metabolism (Acyl Choline)
dihomo-linolenoyl-choline	-0.000567367	0.784015	0.914996	0.00346664	0.0576177	0.192693	Lipid	Fatty Acid Metabolism (Acyl Choline)
docosahexaenoylcholine	0.000554925	0.777821	0.909939	0.00310984	0.085919	0.23823	Lipid	Fatty Acid Metabolism (Acyl Choline)
stearoylcholine*	-0.00135954	0.519121	0.76604	0.00275459	0.156997	0.34511	Lipid	Fatty Acid Metabolism (Acyl Choline)
linoleoylcholine*	-0.000988318	0.639638	0.836099	0.00213874	0.233878	0.442374	Lipid	Fatty Acid Metabolism (Acyl Choline)
palmitoylcholine	-0.000589666	0.772429	0.905798	0.00186556	0.2913	0.501943	Lipid	Fatty Acid Metabolism (Acyl Choline)
oleoylcholine	-0.00148528	0.478018	0.733912	0.000444091	0.806776	0.87783	Lipid	Fatty Acid Metabolism (Acyl Choline)
hexanoylglutamine	-0.00383148	0.0923254	0.379752	-0.00386463	0.0559622	0.192074	Lipid	Fatty Acid Metabolism (Acyl Glutamine)
N-palmitoylglycine	0.000819714	0.567898	0.78657	-0.00271554	0.0203415	0.112803	Lipid	Fatty Acid Metabolism(Acyl Glycine)
hexanoylglycine (C6)	-0.00275701	0.217936	0.532853	0.00121812	0.467667	0.652062	Lipid	Fatty Acid Metabolism(Acyl Glycine)
trans-2-hexenoylglycine	-0.00143358	0.562511	0.785908	-0.00117972	0.516862	0.685404	Lipid	Fatty Acid Metabolism(Acyl Glycine)
stearamide (18:0)	-0.000357646	0.856529	0.952998	0.00126015	0.475301	0.657073	Lipid	Fatty Acid, Amide
2-aminooctanoate	0.00464655	0.019027	0.184242	0.00160274	0.364003	0.571756	Lipid	Fatty Acid, Amino
N-acetyl-2-aminooctanoate*	0.00195424	0.358091	0.644781	-0.000191771	0.921509	0.961917	Lipid	Fatty Acid, Amino
15-methylpalmitate (i17:0)	0.00332028	0.0623208	0.327883	-0.00261644	0.0581334	0.193646	Lipid	Fatty Acid, Branched
17-methylstearate (i19:0)	0.00189877	0.214735	0.532447	-0.00235594	0.062184	0.201177	Lipid	Fatty Acid, Branched
2-hydroxyphytanate*	0.00375656	0.0967863	0.379752	-0.0026084	0.177591	0.372751	Lipid	Fatty Acid, Branched
pristanate	0.000957721	0.629036	0.828648	-0.00138608	0.408999	0.613184	Lipid	Fatty Acid, Branched
glutarate (C5-DC)	-0.000464983	0.853389	0.95167	-0.00366794	0.0440229	0.167837	Lipid	Fatty Acid, Dicarboxylate
eicosanodioate (C20-DC)	-0.00169297	0.267353	0.574022	-0.00288535	0.0570712	0.192074	Lipid	Fatty Acid, Dicarboxylate
hexadecenedioate (C16:1-DC)*	-0.00165233	0.398461	0.675681	-0.00367734	0.0793569	0.229582	Lipid	Fatty Acid, Dicarboxylate
tetradecanedioate (C14)	0.00118364	0.532374	0.778268	-0.00334606	0.0927916	0.250034	Lipid	Fatty Acid, Dicarboxylate
2-hydroxyglutarate	-0.000751967	0.629161	0.828648	-0.00206354	0.105831	0.271106	Lipid	Fatty Acid, Dicarboxylate
hexadecanedioate (C16)	0.0011849	0.541409	0.783772	-0.002857	0.149375	0.332096	Lipid	Fatty Acid, Dicarboxylate
maleate	-0.00503589	0.119731	0.410867	0.00315046	0.21337	0.416498	Lipid	Fatty Acid, Dicarboxylate
octadecenedioate (C18:1-DC)*	-0.000197709	0.916409	0.961885	-0.00240435	0.213102	0.416498	Lipid	Fatty Acid, Dicarboxylate
octadecanedioate (C18)	0.00122255	0.496533	0.748242	-0.00178308	0.330647	0.546058	Lipid	Fatty Acid, Dicarboxylate
hydroxy-CMPF*	0.00155469	0.47264	0.7324	0.00192028	0.41609	0.621905	Lipid	Fatty Acid, Dicarboxylate
3-carboxy-4-methyl-5-pentyl-2-furanpropionate (3-CMPFP)	-0.000867698	0.645461	0.836099	-0.00124664	0.462723	0.648781	Lipid	Fatty Acid, Dicarboxylate
4-hydroxy-2-oxoglutaric acid	0.00116893	0.554215	0.783772	-0.00131461	0.444638	0.634193	Lipid	Fatty Acid, Dicarboxylate
docosadioate (C22-DC)	-0.00136854	0.309131	0.609536	-0.000926913	0.510854	0.680209	Lipid	Fatty Acid, Dicarboxylate
azelate (nonanedioate; C9)	-0.0001018	0.947958	0.977423	0.000527679	0.699947	0.824063	Lipid	Fatty Acid, Dicarboxylate
sebacate (C10-DC)	-0.000277933	0.870128	0.955125	-0.000571038	0.755927	0.859837	Lipid	Fatty Acid, Dicarboxylate
dodecanedioate (C12)	0.00361599	0.0645135	0.328692	-0.00045302	0.806556	0.87783	Lipid	Fatty Acid, Dicarboxylate
dodecenedioate (C12:1-DC)*	0.0015859	0.411916	0.686659	-0.000411855	0.816025	0.884818	Lipid	Fatty Acid, Dicarboxylate
dodecadienoate (12:2)*	0.00404967	0.0132399	0.163957	-0.000345735	0.792188	0.872659	Lipid	Fatty Acid, Dicarboxylate
3-carboxy-4-methyl-5-propyl-2-furanpropanoate (CMPF)	0.00178761	0.431425	0.700886	-0.000105697	0.964605	0.981438	Lipid	Fatty Acid, Dicarboxylate
octadecadienedioate (C18:2-DC)*	-0.00201052	0.251197	0.560784	-9.58717e-05	0.959266	0.98036	Lipid	Fatty Acid, Dicarboxylate
9,10-DiHOME	-0.00239146	0.209279	0.5278	-0.00200993	0.266196	0.479349	Lipid	Fatty Acid, Dihydroxy
12,13-DiHOME	0.00244013	0.201867	0.525109	0.000466656	0.790509	0.872659	Lipid	Fatty Acid, Dihydroxy
5-hydroxyhexanoate	-0.00286396	0.0791082	0.351672	-0.00295417	0.0447216	0.168263	Lipid	Fatty Acid, Monohydroxy
2-hydroxybehenate	-0.00195518	0.118434	0.410867	-0.00246204	0.0483161	0.17728	Lipid	Fatty Acid, Monohydroxy
3-hydroxylaurate	0.00506955	0.00605908	0.105817	-0.00277584	0.0653262	0.203052	Lipid	Fatty Acid, Monohydroxy
3-hydroxyoleate*	0.00567081	0.00553252	0.105817	-0.00247118	0.114044	0.27773	Lipid	Fatty Acid, Monohydroxy
2-hydroxyoctanoate	0.00027143	0.880129	0.959008	-0.00224013	0.132518	0.306722	Lipid	Fatty Acid, Monohydroxy
3-hydroxydecanoate	0.00525595	0.00604129	0.105817	-0.0021051	0.172072	0.365092	Lipid	Fatty Acid, Monohydroxy
16-hydroxypalmitate	0.00234819	0.108432	0.396258	-0.00153497	0.202516	0.403215	Lipid	Fatty Acid, Monohydroxy
2-hydroxyarachidate*	0.00285161	0.0266779	0.218299	-0.00143045	0.224553	0.429733	Lipid	Fatty Acid, Monohydroxy
3-hydroxymyristate	0.0039782	0.00566419	0.105817	-0.00108958	0.33623	0.549683	Lipid	Fatty Acid, Monohydroxy
2-hydroxypalmitate	0.00201781	0.118697	0.410867	-0.00123081	0.315474	0.532888	Lipid	Fatty Acid, Monohydroxy
2-hydroxylaurate	0.00261678	0.0974866	0.379752	0.00107441	0.435807	0.628284	Lipid	Fatty Acid, Monohydroxy
3-hydroxyhexanoate	0.00264053	0.104421	0.388135	-0.00125148	0.443369	0.63357	Lipid	Fatty Acid, Monohydroxy
2-hydroxystearate	0.00216756	0.0777745	0.350523	0.000570795	0.620387	0.766452	Lipid	Fatty Acid, Monohydroxy
5-hydroxyvalproate	-0.000545411	0.652681	0.836595	0.000353083	0.715127	0.83091	Lipid	Fatty Acid, Monohydroxy
3-hydroxystearate	0.00263523	0.0755315	0.346806	-0.000464972	0.704285	0.827075	Lipid	Fatty Acid, Monohydroxy
3-hydroxyoctanoate	0.00540802	0.00407969	0.0949984	-0.000281807	0.869101	0.925019	Lipid	Fatty Acid, Monohydroxy
13-HODE + 9-HODE	7.59998e-05	0.965996	0.984556	0.000151779	0.908398	0.950264	Lipid	Fatty Acid, Monohydroxy
glycerol	-0.00125251	0.506158	0.759047	-0.00309618	0.025484	0.127551	Lipid	Glycerolipid Metabolism
glycerol 3-phosphate	-0.000911793	0.750463	0.893899	-0.00195171	0.273978	0.488853	Lipid	Glycerolipid Metabolism
glycerophosphoglycerol	-0.00250832	0.211106	0.528034	-0.00111439	0.448339	0.634259	Lipid	Glycerolipid Metabolism
glycosyl ceramide (d18:1/20:0, d16:1/22:0)*	0.00350759	0.0361969	0.254681	0.00302799	0.0316982	0.139988	Lipid	Hexosylceramides
glycosyl ceramide (d18:2/24:1, d18:1/24:2)*	0.00160817	0.334795	0.634554	0.0028573	0.0502107	0.181503	Lipid	Hexosylceramides
glycosyl-N-behenoyl-sphingadienine (d18:2/22:0)*	0.00186043	0.307813	0.609211	0.00260711	0.0788979	0.229582	Lipid	Hexosylceramides
glycosyl ceramide (d18:1/23:1, d17:1/24:1)*	0.00282175	0.153798	0.465679	0.0028588	0.0941297	0.252392	Lipid	Hexosylceramides
glycosyl-N-palmitoyl-sphingosine (d18:1/16:0)	0.00236171	0.0628181	0.327883	0.00188403	0.119986	0.28844	Lipid	Hexosylceramides
glycosyl-N-(2-hydroxynervonoyl)-sphingosine (d18:1/24:1(2OH))*	0.00159133	0.385223	0.667795	0.00138412	0.363967	0.571756	Lipid	Hexosylceramides
glycosyl-N-stearoyl-sphingosine (d18:1/18:0)	0.00307895	0.0622422	0.327883	0.000275774	0.830203	0.894346	Lipid	Hexosylceramides
myo-inositol	-9.47139e-05	0.957933	0.980107	-0.0029721	0.109708	0.275792	Lipid	Inositol Metabolism
acetoacetate	-0.0012868	0.644918	0.836099	-0.000713542	0.743151	0.853411	Lipid	Ketone Bodies
3-hydroxybutyrate (BHBA)	0.000823806	0.769095	0.905343	-0.000829667	0.728361	0.841279	Lipid	Ketone Bodies
palmitoleate (16:1n7)	0.000116153	0.958059	0.980107	-0.00410305	0.0143846	0.0949424	Lipid	Long Chain Fatty Acid
stearate (18:0)	0.000259219	0.847206	0.951283	-0.00251906	0.014815	0.0959779	Lipid	Long Chain Fatty Acid
nonadecanoate (19:0)	0.0012072	0.316867	0.618776	-0.00250461	0.0209574	0.114973	Lipid	Long Chain Fatty Acid
10-heptadecenoate (17:1n7)	0.000648142	0.739143	0.889055	-0.00341965	0.021204	0.114973	Lipid	Long Chain Fatty Acid
10-nonadecenoate (19:1n9)	0.000877291	0.630772	0.82916	-0.00303992	0.0328769	0.143249	Lipid	Long Chain Fatty Acid
palmitate (16:0)	0.00085312	0.599139	0.806187	-0.00250768	0.043369	0.167305	Lipid	Long Chain Fatty Acid
margarate (17:0)	0.000812977	0.622461	0.824294	-0.00255336	0.045661	0.170748	Lipid	Long Chain Fatty Acid
myristate (14:0)	0.00208922	0.269572	0.576121	-0.00255407	0.0651703	0.203052	Lipid	Long Chain Fatty Acid
myristoleate (14:1n5)	0.00275185	0.193747	0.524889	-0.00279529	0.0780204	0.228354	Lipid	Long Chain Fatty Acid
pentadecanoate (15:0)	0.00194297	0.187544	0.520742	-0.00180052	0.111565	0.276594	Lipid	Long Chain Fatty Acid
acetylcarnitine (C2)	0.00111211	0.533209	0.778326	-0.0023715	0.120437	0.288812	Lipid	Short-chain Acylcarnitine
3-hydroxybutyrylcarnitine (C3-DC)	0.0028083	0.208668	0.5278	-0.00404097	0.0285483	0.131865	Lipid	Short-chain Acylcarnitine
propionylcarnitine (C3)	-1.9384e-05	0.992663	0.994697	-0.00139398	0.415295	0.621669	Lipid	Short-chain Acylcarnitine
succinylcarnitine (C4-DC)	-0.00276368	0.11943	0.410867	-0.00385424	0.0256937	0.127944	Energy	Short-chain Acylcarnitine
isobutyrylcarnitine (C4)	-0.00321768	0.172952	0.505757	-0.00233646	0.288472	0.501869	Amino Acid	Short-chain Acylcarnitine
2-methylmalonylcarnitine (C4-DC)	-0.0035891	0.125538	0.419733	-0.00521145	0.0131306	0.0915392	Lipid	Short-chain Acylcarnitine
butyrylcarnitine (C4)	0.00255454	0.29811	0.597012	-0.00158104	0.383049	0.587824	Lipid	Short-chain Acylcarnitine
3-hydroxybutyrylcarnitine (C4-OH)	0.00354503	0.168246	0.501641	-0.00161768	0.471187	0.653837	Lipid	Short-chain Acylcarnitine
glutaroylcarnitine (C5)	-0.002131	0.279394	0.582008	-0.00381544	0.037678	0.155163	Amino Acid	Short-chain Acylcarnitine
2-methylbutyroylcarnitine (C5)	-0.00260425	0.197534	0.525109	-0.00397921	0.0553722	0.192074	Amino Acid	Short-chain Acylcarnitine
tiglyl carnitine (C5)	-0.00299971	0.131214	0.429401	-0.00268929	0.164848	0.354386	Amino Acid	Short-chain Acylcarnitine
isovalerylcarnitine (C5)	-0.000395603	0.84243	0.947979	-0.00169371	0.367383	0.574277	Amino Acid	Short-chain Acylcarnitine
3-methylglutarylcarnitine (C6-DC)	-0.0013961	0.604344	0.810766	-0.00537815	0.0102265	0.0791373	Amino Acid	Short-chain Acylcarnitine
adipoylcarnitine (C6-DC)	-0.0018356	0.442462	0.706337	-0.00488316	0.0219005	0.116803	Lipid	Short-chain Acylcarnitine
hexanoylcarnitine (C6)	-0.00115123	0.576963	0.792236	-0.00325407	0.0760122	0.224812	Lipid	Short-chain Acylcarnitine
octanoylcarnitine (C8)	-0.00188728	0.318246	0.618776	-0.00370319	0.064275	0.203052	Lipid	Medium-chain Acylcarnitine
decanoylcarnitine (C10)	-0.00107573	0.547817	0.783772	-0.0040115	0.0405567	0.163663	Lipid	Medium-chain Acylcarnitine
cis-4-decenoylcarnitine (C10:1)	-0.00242267	0.169265	0.501641	-0.00251278	0.166883	0.356407	Lipid	Medium-chain Acylcarnitine
laurylcarnitine (C12)	0.00208082	0.215793	0.532447	-0.00287245	0.0913538	0.24836	Lipid	Medium-chain Acylcarnitine
5-dodecenoylcarnitine (C12:1)	-0.000773516	0.693199	0.859029	-0.00298749	0.106581	0.271308	Lipid	Medium-chain Acylcarnitine
myristoylcarnitine (C14)	0.00410898	0.0137602	0.163957	-0.00288938	0.058578	0.194463	Lipid	Medium-chain Acylcarnitine
myristoleoylcarnitine (C14:1)*	0.00154191	0.403901	0.680263	-0.00160143	0.337963	0.549754	Lipid	Medium-chain Acylcarnitine
palmitoleoylcarnitine (C16:1)*	0.00349087	0.0446861	0.278363	-0.0030847	0.0417515	0.166324	Lipid	Long-chain Acylcarnitine
oleoylcarnitine (C18)	0.00493224	0.00220358	0.0732858	-0.00200071	0.158476	0.347069	Lipid	Long-chain Acylcarnitine
linolenoylcarnitine (C18:3)*	0.00328337	0.0666848	0.332744	0.000296693	0.847852	0.909344	Lipid	Long-chain Acylcarnitine
3-hydroxyoleoylcarnitine (C18:1-OH)	0.00341473	0.0739671	0.346176	-0.00299146	0.0660293	0.204586	Lipid	Long-chain Acylcarnitine
dihomo-linoleoylcarnitine (C20:2)*	0.00511111	0.00380687	0.0946683	0.000787197	0.583262	0.740669	Lipid	Long-chain Acylcarnitine
eicosenoylcarnitine (C20:1)*	0.00510368	0.00394994	0.0946683	-0.000823267	0.559637	0.72154	Lipid	Long-chain Acylcarnitine
docosahexaenoylcarnitine (C22:6)*	0.00103126	0.61381	0.815633	-0.00126823	0.484651	0.662492	Lipid	Long-chain Acylcarnitine
docosapentaenoylcarnitine (C22:5n3)*	0.0045918	0.0132086	0.163957	-0.000805392	0.636517	0.775641	Lipid	Long-chain Acylcarnitine
behenoylcarnitine (C22)*	0.00363699	0.0302118	0.230837	-0.000777034	0.605865	0.760057	Lipid	Long-chain Acylcarnitine
nervonoylcarnitine (C24:1)*	0.00266455	0.142599	0.452376	-0.00247878	0.113754	0.27773	Lipid	Long-chain Acylcarnitine
ximenoylcarnitine (C26:1)*	0.00485225	0.00557432	0.105817	-0.000371836	0.808983	0.879251	Lipid	Long-chain Acylcarnitine
1-arachidonoyl-GPC* (20:4)*	0.00259229	0.0962092	0.379752	0.00381244	0.010437	0.0791373	Lipid	Lysophosphatidylcholine
1-linoleoyl-GPC (18:2)	0.0010157	0.428519	0.699438	0.00248331	0.0212831	0.114973	Lipid	Lysophosphatidylcholine
1-palmitoleoyl-GPC* (16:1)*	0.00121814	0.468288	0.729276	0.00144977	0.2916	0.501943	Lipid	Lysophosphatidylcholine
1-oleoyl-GPC (18:1)	0.00068361	0.56125	0.78564	0.00069511	0.490703	0.664253	Lipid	Lysophosphatidylcholine
1-linolenoyl-GPC (18:3)*	-0.000169984	0.923286	0.963642	0.000317713	0.820128	0.885448	Lipid	Lysophosphatidylcholine
1-oleoyl-GPI (18:1)*	-0.00111145	0.492562	0.747436	-0.00181113	0.196045	0.397797	Lipid	Lysophospholipid
1-palmitoyl-GPG (16:0)*	-0.00116938	0.477945	0.733912	0.00151815	0.279166	0.495392	Lipid	Lysophospholipid
1-palmitoyl-GPA (16:0)	-0.000240904	0.891986	0.959479	0.00164302	0.27901	0.495392	Lipid	Lysophospholipid
1-linoleoyl-GPA (18:2)*	-0.000258283	0.893204	0.959479	0.00164078	0.286054	0.500717	Lipid	Lysophospholipid
1-linoleoyl-GPE (18:2)*	0.00067915	0.688235	0.856353	0.00122649	0.316785	0.532888	Lipid	Lysophospholipid
1-linoleoyl-GPG (18:2)*	-0.00151825	0.350499	0.642131	0.00124259	0.33423	0.54825	Lipid	Lysophospholipid
1-linoleoyl-GPI* (18:2)*	-0.00111441	0.484546	0.741384	0.0010597	0.420122	0.62316	Lipid	Lysophospholipid
1-oleoyl-GPG (18:1)*	-0.000948846	0.612264	0.815633	0.00118835	0.467528	0.652062	Lipid	Lysophospholipid
1-palmitoyl-GPE (16:0)	0.00153627	0.311667	0.611796	0.000658613	0.539435	0.70663	Lipid	Lysophospholipid
1-stearoyl-GPE (18:0)	0.0013638	0.371768	0.655116	0.000597894	0.606977	0.760474	Lipid	Lysophospholipid
1-palmitoyl-GPI* (16:0)	-0.00123914	0.460824	0.722253	0.000679517	0.64095	0.779038	Lipid	Lysophospholipid
1-arachidonoyl-GPI* (20:4)*	-0.00121384	0.416348	0.686659	-0.000584356	0.61541	0.765063	Lipid	Lysophospholipid
1-stearoyl-GPI (18:0)	-0.000745108	0.594395	0.802926	-0.000511636	0.690369	0.816244	Lipid	Lysophospholipid
1-arachidonoyl-GPE (20:4n6)*	0.00141871	0.385791	0.667795	0.000564761	0.65936	0.792531	Lipid	Lysophospholipid
2-stearoyl-GPE (18:0)*	0.000821096	0.612476	0.815633	0.000372457	0.75641	0.859837	Lipid	Lysophospholipid
1-oleoyl-GPE (18:1)	-0.00119711	0.462132	0.723144	6.19392e-05	0.958273	0.98036	Lipid	Lysophospholipid
caprate (10:0)	-0.00287701	0.330982	0.63096	-0.00466624	0.0754705	0.224571	Lipid	Medium Chain Fatty Acid
laurate (12:0)	0.00374379	0.0661339	0.331687	-0.0023451	0.118138	0.285403	Lipid	Medium Chain Fatty Acid
5-dodecenoate (12:1n7)	0.00208642	0.338211	0.635194	-0.00283483	0.110204	0.275792	Lipid	Medium Chain Fatty Acid
caprylate (8:0)	-0.00352869	0.355415	0.644781	-0.00406676	0.196888	0.398644	Lipid	Medium Chain Fatty Acid
caproate (6:0)	0.000889609	0.446064	0.706337	-0.000999429	0.43708	0.629189	Lipid	Medium Chain Fatty Acid
10-undecenoate (11:1n1)	0.00473346	0.0149809	0.170365	0.000330408	0.834157	0.897615	Lipid	Medium Chain Fatty Acid
heptanoate (7:0)	-0.00200866	0.233779	0.550007	-3.97256e-05	0.976987	0.985061	Lipid	Medium Chain Fatty Acid
1-docosahexaenoylglycerol (22:6)	-0.000780529	0.731451	0.884252	-0.00474898	0.0178236	0.105566	Lipid	Monoacylglycerol
1-linolenoylglycerol (18:3)	-0.00238133	0.281014	0.582008	-0.00426104	0.020985	0.114973	Lipid	Monoacylglycerol
1-linoleoylglycerol (18:2)	-0.00256621	0.270473	0.576301	-0.00403456	0.0282429	0.131865	Lipid	Monoacylglycerol
2-linoleoylglycerol (18:2)	-0.00239632	0.283291	0.583281	-0.00338586	0.0651911	0.203052	Lipid	Monoacylglycerol
1-myristoylglycerol (14:0)	-0.00111142	0.653946	0.836763	-0.0033092	0.0651493	0.203052	Lipid	Monoacylglycerol
1-dihomo-linoleoylglycerol (20:2)	-0.00301872	0.144414	0.455601	-0.00167358	0.295244	0.505995	Lipid	Monoacylglycerol
1-dihomo-linolenylglycerol (20:3)	-0.00264157	0.219537	0.53543	-0.00165833	0.350425	0.558732	Lipid	Monoacylglycerol
1-palmitoylglycerol (16:0)	-0.00320402	0.192566	0.524889	-0.000977902	0.589884	0.746151	Lipid	Monoacylglycerol
1,2-dilinoleoyl-GPC (18:2/18:2)	6.3215e-05	0.967591	0.984556	0.00208857	0.0794437	0.229582	Lipid	Phosphatidylcholine
1-myristoyl-2-palmitoyl-GPC (14:0/16:0)	0.000495978	0.731357	0.884252	-0.00280108	0.0770559	0.226526	Lipid	Phosphatidylcholine
1-palmitoyl-2-docosahexaenoyl-GPC (16:0/22:6)	0.00237336	0.0559335	0.316202	0.0015575	0.140206	0.316762	Lipid	Phosphatidylcholine
1-palmitoyl-2-arachidonoyl-GPC (16:0/20:4n6)	0.00197706	0.0942507	0.379752	0.00120167	0.222417	0.428293	Lipid	Phosphatidylcholine
1-stearoyl-2-arachidonoyl-GPC (18:0/20:4)	0.00188226	0.0776864	0.350523	0.001098	0.281078	0.49788	Lipid	Phosphatidylcholine
1-linoleoyl-2-linolenoyl-GPC (18:2/18:3)*	-0.00276385	0.204025	0.525109	0.00153721	0.340913	0.551793	Lipid	Phosphatidylcholine
1-palmitoleoyl-2-linolenoyl-GPC (16:1/18:3)*	-0.00169523	0.398053	0.675681	-0.00143896	0.389772	0.593475	Lipid	Phosphatidylcholine
1-stearoyl-2-linoleoyl-GPC (18:0/18:2)*	-2.1889e-05	0.981759	0.987819	0.000560159	0.484356	0.662492	Lipid	Phosphatidylcholine
1-stearoyl-2-docosahexaenoyl-GPC (18:0/22:6)	0.00111113	0.429818	0.699438	0.000917046	0.478275	0.658795	Lipid	Phosphatidylcholine
1-myristoyl-2-arachidonoyl-GPC (14:0/20:4)*	0.00244477	0.187033	0.520742	0.000998074	0.521156	0.689225	Lipid	Phosphatidylcholine
1,2-dipalmitoyl-GPC (16:0/16:0)	0.00178801	0.0444847	0.278363	0.000537141	0.629737	0.771212	Lipid	Phosphatidylcholine
1-palmitoyl-2-linoleoyl-GPC (16:0/18:2)	0.000348346	0.725724	0.882784	-0.000447069	0.59709	0.753894	Lipid	Phosphatidylcholine
1-oleoyl-2-docosahexaenoyl-GPC (18:1/22:6)*	8.11562e-05	0.948567	0.977423	0.000260602	0.804353	0.877563	Lipid	Phosphatidylcholine
1-palmitoyl-2-arachidonoyl-GPE (16:0/20:4)*	-0.000982132	0.555047	0.783772	-0.0036806	0.0131175	0.0915392	Lipid	Phosphatidylethanolamine
1-palmitoyl-2-linoleoyl-GPE (16:0/18:2)	-0.00292506	0.104171	0.388135	-0.00435111	0.012019	0.0857922	Lipid	Phosphatidylethanolamine
1-stearoyl-2-linoleoyl-GPE (18:0/18:2)*	-0.00214273	0.20403	0.525109	-0.00413212	0.0114573	0.0834499	Lipid	Phosphatidylethanolamine
1-stearoyl-2-arachidonoyl-GPE (18:0/20:4)	-0.000406881	0.804161	0.925939	-0.00322524	0.0226785	0.119001	Lipid	Phosphatidylethanolamine
1-stearoyl-2-docosahexaenoyl-GPE (18:0/22:6)*	-0.00162257	0.338381	0.635194	-0.00277905	0.0324081	0.14184	Lipid	Phosphatidylethanolamine
1-palmitoyl-2-stearoyl-GPE (16:0/18:0)*	0.00112881	0.564659	0.786212	-0.00195366	0.206333	0.409311	Lipid	Phosphatidylethanolamine
1,2-dilinoleoyl-GPE (18:2/18:2)*	-0.00325279	0.116479	0.410867	-0.00111176	0.48865	0.664237	Lipid	Phosphatidylethanolamine
1,2-dipalmitoyl-GPE (16:0/16:0)*	0.000925947	0.601059	0.807467	0.000187949	0.902565	0.945175	Lipid	Phosphatidylethanolamine
1-palmitoyl-2-arachidonoyl-GPI (16:0/20:4)*	0.00125547	0.367346	0.652022	0.00153201	0.291488	0.501943	Lipid	Phosphatidylinositol
1-stearoyl-2-linoleoyl-GPI (18:0/18:2)	0.00234233	0.0829745	0.355071	0.00119089	0.403454	0.609225	Lipid	Phosphatidylinositol
1-palmitoyl-2-linoleoyl-GPI (16:0/18:2)	0.00160568	0.312153	0.611796	0.00119001	0.460529	0.647661	Lipid	Phosphatidylinositol
1-stearoyl-2-oleoyl-GPI (18:0/18:1)*	0.0038227	0.0261435	0.216681	-0.00113056	0.536144	0.703328	Lipid	Phosphatidylinositol
1-stearoyl-2-oleoyl-GPS (18:0/18:1)	0.0032428	0.094654	0.379752	0.00250598	0.129896	0.304025	Lipid	Phosphatidylserine
glycerophosphoethanolamine	0.00137895	0.355667	0.644781	0.00189839	0.091022	0.248149	Lipid	Phospholipid Metabolism
trimethylamine N-oxide	0.0021486	0.351906	0.642131	-0.00172429	0.417408	0.622875	Lipid	Phospholipid Metabolism
choline	0.00157936	0.138897	0.445382	0.00072111	0.510282	0.680209	Lipid	Phospholipid Metabolism
1-(1-enyl-stearoyl)-2-oleoyl-GPE (P-18:0/18:1)	0.00230842	0.0956103	0.379752	0.00249753	0.0353187	0.149226	Lipid	Plasmalogen
1-(1-enyl-palmitoyl)-2-oleoyl-GPC (P-16:0/18:1)*	0.00214116	0.151035	0.464504	0.00243496	0.0615999	0.200405	Lipid	Plasmalogen
1-(1-enyl-palmitoyl)-2-oleoyl-GPE (P-16:0/18:1)*	0.00056621	0.692772	0.859029	0.00152826	0.238147	0.448709	Lipid	Plasmalogen
1-(1-enyl-palmitoyl)-2-palmitoleoyl-GPC (P-16:0/16:1)*	0.00112046	0.474331	0.7324	-0.000887823	0.578615	0.740097	Lipid	Plasmalogen
docosadienoate (22:2n6)	-0.000567077	0.716642	0.879393	-0.00343123	0.0133421	0.0917037	Lipid	Polyunsaturated Fatty Acid (n3 and n6)
hexadecadienoate (16:2n6)	-0.00105646	0.611963	0.815633	-0.0037561	0.0213218	0.114973	Lipid	Polyunsaturated Fatty Acid (n3 and n6)
docosahexaenoate (DHA; 22:6n3)	-0.000537727	0.760069	0.899937	-0.00328162	0.0292013	0.132561	Lipid	Polyunsaturated Fatty Acid (n3 and n6)
linolenate (18:3n3 or 3n6)	-0.000895557	0.646012	0.836099	-0.00294947	0.0576501	0.192693	Lipid	Polyunsaturated Fatty Acid (n3 and n6)
linoleate (18:2n6)	-0.00044673	0.804753	0.925939	-0.00220045	0.112817	0.27773	Lipid	Polyunsaturated Fatty Acid (n3 and n6)
dihomolinoleate (20:2n6)	-0.000282872	0.874196	0.957406	-0.0019318	0.143953	0.322985	Lipid	Polyunsaturated Fatty Acid (n3 and n6)
adrenate (22:4n6)	2.36249e-05	0.990246	0.994697	-0.00220264	0.125878	0.299651	Lipid	Polyunsaturated Fatty Acid (n3 and n6)
docosapentaenoate (n6 DPA; 22:5n6)	-0.00141634	0.435411	0.702693	-0.0017541	0.222992	0.428426	Lipid	Polyunsaturated Fatty Acid (n3 and n6)
arachidonate (20:4n6)	-0.000460906	0.798875	0.925323	-0.000969653	0.471543	0.653837	Lipid	Polyunsaturated Fatty Acid (n3 and n6)
dihomolinolenate (20:3n3 or 3n6)	-0.00101416	0.559176	0.78564	-0.000852382	0.516291	0.685404	Lipid	Polyunsaturated Fatty Acid (n3 and n6)
docosatrienoate (22:3n3)	0.00191846	0.321182	0.619558	0.000340027	0.816825	0.884818	Lipid	Polyunsaturated Fatty Acid (n3 and n6)
pregnenediol sulfate (C21H34O5S)*	0.00236678	0.261308	0.568522	0.00417921	0.0178468	0.105566	Lipid	Pregnenolone Steroids
21-hydroxypregnanolone disulfate	-0.000410379	0.622856	0.824294	-0.00239798	0.132425	0.306722	Lipid	Pregnenolone Steroids
21-hydroxypregnenolone disulfate	-2.04419e-05	0.992636	0.994697	-0.00213129	0.293873	0.504966	Lipid	Pregnenolone Steroids
pregnenolone sulfate	0.00151033	0.505877	0.759047	0.00191069	0.288139	0.501869	Lipid	Pregnenolone Steroids
17alpha-hydroxypregnenolone 3-sulfate	0.00169844	0.336854	0.635194	0.000381898	0.765228	0.862428	Lipid	Pregnenolone Steroids
pregnen-diol disulfate*	-0.000823045	0.681463	0.85009	-0.000520626	0.782689	0.870421	Lipid	Pregnenolone Steroids
taurochenodeoxycholate	-0.000153969	0.954335	0.97937	-0.00733377	0.0183625	0.107316	Lipid	Primary Bile Acid Metabolism
glycochenodeoxycholate	0.00127148	0.564775	0.786212	-0.0043065	0.0888732	0.244339	Lipid	Primary Bile Acid Metabolism
glyco-alpha-muricholate	-0.00180957	0.442394	0.706337	-0.00299878	0.191299	0.394412	Lipid	Primary Bile Acid Metabolism
tauro-beta-muricholate	-0.00157099	0.553899	0.783772	-0.00288236	0.266708	0.479387	Lipid	Primary Bile Acid Metabolism
chenodeoxycholate	0.00619897	0.0118991	0.159416	0.00157864	0.445625	0.634193	Lipid	Primary Bile Acid Metabolism
glyco-beta-muricholate	-0.00108095	0.693899	0.859029	-0.00231714	0.340465	0.551793	Lipid	Primary Bile Acid Metabolism
cholate	0.00144547	0.64756	0.836099	0.000744217	0.768588	0.864219	Lipid	Primary Bile Acid Metabolism
glycochenodeoxycholate glucuronide (1)	-0.00267179	0.238418	0.552522	-0.000614944	0.790534	0.872659	Lipid	Primary Bile Acid Metabolism
glycocholate glucuronide (1)	-0.00492571	0.0695477	0.338532	-0.000502321	0.810601	0.880029	Lipid	Primary Bile Acid Metabolism
5alpha-pregnan-3beta,20beta-diol monosulfate (1)	0.000901387	0.717995	0.879949	0.0041195	0.0230908	0.119876	Lipid	Progestin Steroids
pregnanolone/allopregnanolone sulfate	0.000733439	0.708982	0.872181	0.0026189	0.0271339	0.129569	Lipid	Progestin Steroids
5alpha-pregnan-3beta,20alpha-diol disulfate	-0.000413828	0.863031	0.955125	0.00181573	0.401929	0.60819	Lipid	Progestin Steroids
5alpha-pregnan-diol disulfate	-0.00311596	0.281194	0.582008	-0.00206364	0.443149	0.63357	Lipid	Progestin Steroids
pregnanediol-3-glucuronide	-0.00200551	0.446652	0.706337	0.00107076	0.601035	0.75594	Lipid	Progestin Steroids
taurocholenate sulfate*	-0.00244113	0.24243	0.552522	-0.00591799	0.0491267	0.178909	Lipid	Secondary Bile Acid Metabolism
glycohyocholate	-0.00384483	0.168216	0.501641	-0.00509422	0.0816229	0.232936	Lipid	Secondary Bile Acid Metabolism
deoxycholate	0.00406319	0.111453	0.405207	0.00346739	0.106435	0.271308	Lipid	Secondary Bile Acid Metabolism
glycocholenate sulfate*	-0.00116577	0.512131	0.761192	-0.00389771	0.0973239	0.256222	Lipid	Secondary Bile Acid Metabolism
taurolithocholate	0.00255716	0.0367319	0.254779	0.00246821	0.127908	0.302794	Lipid	Secondary Bile Acid Metabolism
taurodeoxycholate	0.00380398	0.115586	0.410867	0.00323507	0.192844	0.394582	Lipid	Secondary Bile Acid Metabolism
glycodeoxycholate	0.00367661	0.137295	0.441693	0.0031322	0.200133	0.401088	Lipid	Secondary Bile Acid Metabolism
tauroursodeoxycholate	0.00267224	0.235248	0.550007	-0.00357061	0.191549	0.394412	Lipid	Secondary Bile Acid Metabolism
glycodeoxycholate sulfate	-0.0033277	0.220639	0.535446	-0.00379815	0.228476	0.435472	Lipid	Secondary Bile Acid Metabolism
taurolithocholate 3-sulfate	-5.89855e-05	0.980688	0.987758	-0.0037916	0.215811	0.420422	Lipid	Secondary Bile Acid Metabolism
glycolithocholate sulfate*	0.000445954	0.851292	0.951556	-0.00325504	0.272294	0.486738	Lipid	Secondary Bile Acid Metabolism
hyocholate	0.00193786	0.535522	0.780538	0.00201921	0.358707	0.568341	Lipid	Secondary Bile Acid Metabolism
glycoursodeoxycholate	0.00444397	0.063529	0.327883	-0.00145364	0.632582	0.773685	Lipid	Secondary Bile Acid Metabolism
sphingadienine	0.00129076	0.561515	0.78564	0.00198239	0.260285	0.473068	Lipid	Sphingolipid Synthesis
sphinganine	0.00121074	0.464685	0.72482	0.00148588	0.304813	0.520068	Lipid	Sphingolipid Synthesis
sphingomyelin (d18:2/23:1)*	0.00240799	0.153375	0.465679	0.00291816	0.019651	0.109596	Lipid	Sphingomyelins
behenoyl sphingomyelin (d18:1/22:0)*	0.00211548	0.0856176	0.360923	0.00252328	0.024336	0.123444	Lipid	Sphingomyelins
sphingomyelin (d18:1/14:0, d16:1/16:0)*	0.00313745	0.028561	0.225263	0.00230391	0.0308369	0.138059	Lipid	Sphingomyelins
sphingomyelin (d18:1/24:1, d18:2/24:0)*	0.00160928	0.14119	0.450854	0.00195443	0.0524822	0.187295	Lipid	Sphingomyelins
sphingomyelin (d18:2/21:0, d16:2/23:0)*	0.00358503	0.0538561	0.31352	0.00262212	0.0543327	0.191439	Lipid	Sphingomyelins
stearoyl sphingomyelin (d18:1/18:0)	0.00261958	0.0764681	0.349151	0.00237414	0.0552037	0.192074	Lipid	Sphingomyelins
sphingomyelin (d17:1/14:0, d16:1/15:0)*	0.00402556	0.0631989	0.327883	0.00286	0.0607791	0.199149	Lipid	Sphingomyelins
sphingomyelin (d18:1/25:0, d19:0/24:1, d20:1/23:0, d19:1/24:0)*	0.00317591	0.0795058	0.35184	0.00293565	0.0525809	0.187295	Lipid	Sphingomyelins
sphingomyelin (d18:2/14:0, d18:1/14:1)*	0.00199557	0.325202	0.624848	0.00238684	0.0610655	0.199331	Lipid	Sphingomyelins
sphingomyelin (d17:2/16:0, d18:2/15:0)*	0.00458448	0.0331131	0.245338	0.0025873	0.0710839	0.216131	Lipid	Sphingomyelins
sphingomyelin (d18:2/18:1)*	0.00133894	0.398842	0.675681	0.00227019	0.0608056	0.199149	Lipid	Sphingomyelins
sphingomyelin (d18:2/16:0, d18:1/16:1)*	0.00225544	0.10282	0.38528	0.00149623	0.122365	0.292717	Lipid	Sphingomyelins
sphingomyelin (d18:1/18:1, d18:2/18:0)	0.00202694	0.206175	0.52645	0.00150214	0.197504	0.398644	Lipid	Sphingomyelins
hexadecasphingosine (d16:1)*	0.00308013	0.0636992	0.327883	0.00333632	0.0230686	0.119876	Lipid	Sphingosines
sphingosine	0.00117357	0.54319	0.783772	0.000784356	0.629348	0.771212	Lipid	Sphingosines
3beta,7alpha-dihydroxy-5-cholestenoate	0.000702239	0.666118	0.844959	0.00356551	0.0323555	0.14184	Lipid	Sterol
beta-sitosterol	-0.00437126	0.0754513	0.346806	-0.00355047	0.0851192	0.237361	Lipid	Sterol
campesterol	-0.000907709	0.661207	0.843104	-0.00182054	0.259	0.472493	Lipid	Sterol
7-HOCA	0.00299927	0.0428001	0.273585	0.00096955	0.529954	0.698023	Lipid	Sterol
3beta-hydroxy-5-cholestenoate	0.00181234	0.243658	0.552709	0.00054537	0.744986	0.853411	Lipid	Sterol
4-cholesten-3-one	0.000145695	0.912988	0.961885	-0.000412003	0.791035	0.872659	Lipid	Sterol
cholesterol	0.00218773	0.0743323	0.346176	9.28308e-05	0.939286	0.973188	Lipid	Sterol
N1-methylinosine	-0.00230825	0.256729	0.564227	-0.00454873	0.0267851	0.129164	Nucleotide	Purine Metabolism
ADP	0.00208325	0.362781	0.648581	0.00351246	0.0429116	0.167305	Nucleotide	Purine Metabolism
N2,N2-dimethylguanosine	-0.00273948	0.199246	0.525109	-0.00454376	0.0376709	0.155163	Nucleotide	Purine Metabolism
adenine	-0.00268968	0.185107	0.520742	-0.00315048	0.0627449	0.201444	Nucleotide	Purine Metabolism
AMP	0.00436365	0.0247447	0.20946	0.00241484	0.119207	0.287273	Nucleotide	Purine Metabolism
N6-methyladenosine	-0.00205476	0.210364	0.5278	0.00151089	0.202847	0.403215	Nucleotide	Purine Metabolism
guanosine	0.000216913	0.900975	0.959897	0.00128927	0.330439	0.546058	Nucleotide	Purine Metabolism
xanthine	0.000462786	0.727133	0.883399	0.00126563	0.429892	0.628284	Nucleotide	Purine Metabolism
inosine	0.00537744	0.124699	0.419733	0.00211269	0.45813	0.645217	Nucleotide	Purine Metabolism
xanthosine	-0.00116716	0.492091	0.747436	-0.00156594	0.441842	0.633242	Nucleotide	Purine Metabolism
allantoin	0.000352425	0.787923	0.917368	-0.000151888	0.900191	0.945175	Nucleotide	Purine Metabolism
urate	0.00294554	0.0554631	0.315366	0.000103131	0.933747	0.969507	Nucleotide	Purine Metabolism
3-ureidopropionate	-0.000560517	0.793565	0.921742	-0.00578014	0.0137104	0.0929264	Nucleotide	Pyrimidine Metabolism
beta-alanine	-0.000569639	0.680768	0.85009	-0.00187093	0.196021	0.397797	Nucleotide	Pyrimidine Metabolism
5-methyluridine (ribothymidine)	0.00209576	0.0975659	0.379752	0.00129895	0.269688	0.483851	Nucleotide	Pyrimidine Metabolism
3-aminoisobutyrate	0.000608905	0.769263	0.905343	-0.00201923	0.317017	0.532888	Nucleotide	Pyrimidine Metabolism
5,6-dihydrouracil	0.000931341	0.573948	0.790593	-0.0012139	0.372373	0.576896	Nucleotide	Pyrimidine Metabolism
2'-O-methylcytidine	0.000279772	0.868273	0.955125	0.000797843	0.532811	0.70084	Nucleotide	Pyrimidine Metabolism
CMP	0.00130403	0.495802	0.748242	0.000805321	0.558344	0.720825	Nucleotide	Pyrimidine Metabolism
2'-deoxyuridine	-0.000323325	0.848781	0.951556	-0.000798884	0.587462	0.744627	Nucleotide	Pyrimidine Metabolism
orotate	0.000893848	0.629535	0.828648	0.000831989	0.690797	0.816244	Nucleotide	Pyrimidine Metabolism
3-methylcytidine	-0.00148127	0.370256	0.65481	-0.000925683	0.518272	0.686341	Nucleotide	Pyrimidine Metabolism
5,6-dihydrothymine	0.00285721	0.0551004	0.315366	-0.000602193	0.673612	0.804598	Nucleotide	Pyrimidine Metabolism
orotidine	-0.000494268	0.866223	0.955125	-0.00132739	0.711541	0.829706	Nucleotide	Pyrimidine Metabolism
dihydroorotate	0.00318821	0.124017	0.419682	-0.000425447	0.819647	0.885448	Nucleotide	Pyrimidine Metabolism
uracil	0.000837095	0.595803	0.803717	-0.000181325	0.889241	0.93827	Nucleotide	Pyrimidine Metabolism
2'-O-methyluridine	0.00021637	0.897867	0.959897	-8.44902e-05	0.95583	0.979927	Nucleotide	Pyrimidine Metabolism
glucuronide of C14H22O4 (2)*	-0.00297614	0.176779	0.512139	-0.00471171	0.0132377	0.091631	Partially Characterized Molecules	Partially Characterized Molecules
glucuronide of C10H18O2 (8)*	-0.00263902	0.205246	0.52645	-0.00342608	0.142881	0.321317	Partially Characterized Molecules	Partially Characterized Molecules
glucuronide of C10H18O2 (7)*	-0.00405187	0.220604	0.535446	-0.00331506	0.216389	0.420709	Partially Characterized Molecules	Partially Characterized Molecules
glucuronide of C19H28O4 (1)*	-0.000271235	0.9252	0.963642	-0.00082046	0.337713	0.549754	Partially Characterized Molecules	Partially Characterized Molecules
glucuronide of C8H16O2 (1)*	-0.00412105	0.149083	0.464342	-0.00189068	0.60788	0.760629	Partially Characterized Molecules	Partially Characterized Molecules
glycine conjugate of C10H14O2 (1)*	-0.00363745	0.0767561	0.349151	-0.000793763	0.679619	0.807927	Partially Characterized Molecules	Partially Characterized Molecules
glucuronide of C10H18O2 (1)*	-0.000974129	0.531733	0.778268	-0.000157262	0.932367	0.969105	Partially Characterized Molecules	Partially Characterized Molecules
glucuronide of C8H14O2 (3)*	-0.000347073	0.879309	0.959008	-0.000660008	0.759407	0.859837	Partially Characterized Molecules	Partially Characterized Molecules
4-hydroxyphenylacetylglutamine	-0.00422669	0.203724	0.525109	-0.00726188	0.00938522	0.0750818	Peptide	Acetylated Peptides
phenylacetylglutamate	-0.00291769	0.299251	0.597012	-0.0046765	0.0728061	0.219317	Peptide	Acetylated Peptides
phenylacetylglutamine	-0.00116404	0.580191	0.793344	-0.00183989	0.333142	0.54825	Peptide	Acetylated Peptides
phenylacetylcarnitine	0.00331862	0.200133	0.525109	0.00163685	0.438651	0.629909	Peptide	Acetylated Peptides
phenylacetylmethionine	-0.00249821	0.357614	0.644781	-0.00211507	0.431438	0.628284	Peptide	Acetylated Peptides
phenylacetylhistidine	-0.00235861	0.242076	0.552522	-0.00110527	0.564452	0.726788	Peptide	Acetylated Peptides
glycylvaline	0.00206079	0.186764	0.520742	-0.00195451	0.0870789	0.240082	Peptide	Dipeptide
prolylglycine	-0.00164028	0.394938	0.675681	-0.00271224	0.0976584	0.256222	Peptide	Dipeptide
isoleucylglycine	-0.00236143	0.179667	0.513785	0.00165329	0.262397	0.474259	Peptide	Dipeptide
histidylalanine	-0.000865557	0.553319	0.783772	0.00122783	0.350922	0.558732	Peptide	Dipeptide
valylglycine	-0.000836122	0.676504	0.85009	0.00153695	0.350925	0.558732	Peptide	Dipeptide
ADpSGEGDFXAEGGGVR*	0.00205674	0.146971	0.461374	0.00174042	0.0808982	0.231544	Peptide	Fibrinogen Cleavage Peptide
ADSGEGDFXAEGGGVR*	0.000554076	0.672678	0.848099	0.00118615	0.213158	0.416498	Peptide	Fibrinogen Cleavage Peptide
gamma-glutamylhistidine	-0.00260726	0.256327	0.564227	-0.00258284	0.0476539	0.17551	Peptide	Gamma-glutamyl Amino Acid
gamma-glutamylphenylalanine	-0.000481461	0.729108	0.884057	-0.00249269	0.0920057	0.249438	Peptide	Gamma-glutamyl Amino Acid
gamma-glutamyltryptophan	0.00112752	0.415867	0.686659	-0.00242164	0.128333	0.302794	Peptide	Gamma-glutamyl Amino Acid
gamma-glutamylmethionine	0.0023828	0.0977415	0.379752	0.00183173	0.242478	0.451771	Peptide	Gamma-glutamyl Amino Acid
gamma-glutamylglycine	0.000271913	0.871137	0.955125	-0.00167526	0.226996	0.433557	Peptide	Gamma-glutamyl Amino Acid
gamma-glutamyltyrosine	0.00123212	0.451675	0.711333	-0.00192498	0.245048	0.45469	Peptide	Gamma-glutamyl Amino Acid
gamma-glutamylleucine	0.00153857	0.17324	0.505757	0.000781365	0.579711	0.740097	Peptide	Gamma-glutamyl Amino Acid
gamma-glutamyl-alpha-lysine	0.000727841	0.56862	0.78657	-0.000856657	0.556216	0.719983	Peptide	Gamma-glutamyl Amino Acid
gamma-glutamylvaline	-0.000151739	0.905805	0.961013	-0.0007285	0.574824	0.736257	Peptide	Gamma-glutamyl Amino Acid
gamma-glutamylisoleucine*	0.000369955	0.781671	0.91335	0.000382233	0.770457	0.865323	Peptide	Gamma-glutamyl Amino Acid
gamma-glutamyl-epsilon-lysine	0.000638104	0.652228	0.836595	0.000473254	0.725869	0.839394	Peptide	Gamma-glutamyl Amino Acid
gamma-glutamylglutamate	-0.000445232	0.833992	0.941852	0.000113434	0.941285	0.973385	Peptide	Gamma-glutamyl Amino Acid
gamma-glutamylthreonine	0.00342402	0.016609	0.172804	-0.000222139	0.866588	0.924278	Peptide	Gamma-glutamyl Amino Acid
HWESASLLR	-0.0010109	0.464174	0.72482	0.00236803	0.0312898	0.138813	Peptide	Polypeptide
HWESASXX*	0.000342022	0.852467	0.95167	0.00226076	0.128602	0.302794	Peptide	Polypeptide
1H-indole-7-acetic acid	0.000129714	0.951438	0.977423	0.00308341	0.0838056	0.235718	Xenobiotics	Bacterial/Fungal
N-methylpipecolate	-0.00155844	0.50836	0.759047	-0.00300589	0.147437	0.329287	Xenobiotics	Bacterial/Fungal
tartronate (hydroxymalonate)	-0.00196312	0.295906	0.597012	-0.00178497	0.200982	0.401963	Xenobiotics	Bacterial/Fungal
benzoate	0.000457099	0.719866	0.880714	-0.00200036	0.0347685	0.148184	Xenobiotics	Benzoate Metabolism
o-cresol sulfate	-0.00106624	0.538675	0.7828	-0.00358622	0.0393858	0.160839	Xenobiotics	Benzoate Metabolism
propyl 4-hydroxybenzoate sulfate	-0.00233064	0.438968	0.706103	-0.00531328	0.0500235	0.181498	Xenobiotics	Benzoate Metabolism
4-hydroxyhippurate	-0.00213625	0.469698	0.729496	-0.00448984	0.0739487	0.222074	Xenobiotics	Benzoate Metabolism
hippurate	-0.001282	0.656488	0.838179	-0.00315024	0.229783	0.435472	Xenobiotics	Benzoate Metabolism
3-(3-hydroxyphenyl)propionate sulfate	1.90264e-05	0.992254	0.994697	-0.00175851	0.192412	0.394526	Xenobiotics	Benzoate Metabolism
4-vinylphenol sulfate	0.00295166	0.203023	0.525109	-0.00317863	0.22347	0.4285	Xenobiotics	Benzoate Metabolism
3-methoxycatechol sulfate (2)	0.00240233	0.216899	0.532853	-0.00128404	0.32216	0.539329	Xenobiotics	Benzoate Metabolism
3-phenylpropionate (hydrocinnamate)	0.00364693	0.123551	0.419558	0.00220274	0.298285	0.509854	Xenobiotics	Benzoate Metabolism
3-methoxycatechol sulfate (1)	0.00362329	0.136937	0.441693	-0.00143342	0.496578	0.669244	Xenobiotics	Benzoate Metabolism
3-hydroxyhippurate	0.00350863	0.195062	0.525109	-0.00109104	0.655732	0.791093	Xenobiotics	Benzoate Metabolism
p-cresol sulfate	-7.22988e-05	0.979015	0.987758	0.00191116	0.419292	0.622875	Xenobiotics	Benzoate Metabolism
catechol sulfate	0.00346945	0.274317	0.579442	0.00221768	0.347549	0.558732	Xenobiotics	Benzoate Metabolism
4-methylguaiacol sulfate	-0.00427829	0.150596	0.464504	-0.000684732	0.783022	0.870421	Xenobiotics	Benzoate Metabolism
4-ethylphenyl sulfate	-0.00146369	0.664159	0.843568	0.000449744	0.87714	0.929626	Xenobiotics	Benzoate Metabolism
guaiacol sulfate	0.0016292	0.620355	0.823212	4.87672e-05	0.984042	0.988706	Xenobiotics	Benzoate Metabolism
4-acetylphenyl sulfate	0.00467949	0.0220195	0.198381	-0.000255821	0.885334	0.936171	Xenobiotics	Benzoate Metabolism
4-methylcatechol sulfate	-0.000887062	0.771384	0.905798	-0.000126978	0.961902	0.981438	Xenobiotics	Benzoate Metabolism
3-(3-hydroxyphenyl)propionate	0.00253507	0.150753	0.464504	0.000384416	0.829858	0.894346	Xenobiotics	Benzoate Metabolism
EDTA	0.00157231	0.0704851	0.339579	0.00190397	0.0175281	0.104954	Xenobiotics	Chemical
succinimide	-0.00112742	0.5018	0.755016	-0.00425176	0.0173841	0.104954	Xenobiotics	Chemical
thioproline	0.00216324	0.118556	0.410867	0.00260576	0.0284407	0.131865	Xenobiotics	Chemical
trizma acetate	-0.00809779	0.029307	0.228508	-0.00590094	0.0966477	0.256222	Xenobiotics	Chemical
sulfate*	-0.00172898	0.241422	0.552522	-0.00206735	0.0827255	0.234695	Xenobiotics	Chemical
O-sulfo-L-tyrosine	-0.00101932	0.579436	0.793344	-0.00235631	0.124068	0.296064	Xenobiotics	Chemical
perfluorooctanesulfonate (PFOS)	0.00311636	0.221576	0.536391	0.00302414	0.161318	0.348992	Xenobiotics	Chemical
diethanolamine	-0.00360748	0.201364	0.525109	0.00276257	0.250071	0.46313	Xenobiotics	Chemical
diglycerol	-0.00353342	0.159675	0.480499	-0.0020719	0.315157	0.532888	Xenobiotics	Chemical
dimethyl sulfone	-0.00183561	0.429523	0.699438	0.00169	0.373458	0.577646	Xenobiotics	Chemical
ectoine	-0.00112552	0.589698	0.797779	-0.00189575	0.43339	0.628284	Xenobiotics	Chemical
indoleacetylcarnitine*	0.00358474	0.128595	0.426324	0.00124716	0.543293	0.707949	Xenobiotics	Chemical
2-methoxyresorcinol sulfate	0.00287613	0.0820155	0.355071	-0.00102999	0.542535	0.707906	Xenobiotics	Chemical
2-aminophenol sulfate	0.00113621	0.645979	0.836099	-0.00113106	0.618478	0.765063	Xenobiotics	Chemical
iminodiacetate (IDA)	-0.000673436	0.644551	0.836099	-0.000971695	0.447708	0.634259	Xenobiotics	Chemical
ethyl glucuronide	-0.000664805	0.492941	0.747436	0.000692175	0.581613	0.740097	Xenobiotics	Chemical
6-hydroxyindole sulfate	0.00066214	0.793377	0.921742	-0.000817523	0.72352	0.83767	Xenobiotics	Chemical
3-acetylphenol sulfate	0.00172931	0.298271	0.597012	-0.000103495	0.952395	0.977432	Xenobiotics	Chemical
3-hydroxypyridine sulfate	0.00821991	0.0185481	0.183233	0.00151871	0.622831	0.767529	Xenobiotics	Chemical
desmethylnaproxen sulfate	-0.00183337	0.365566	0.650043	-0.00243884	0.0854462	0.237594	Xenobiotics	Drug - Analgesics, Anesthetics
diclofenac	0.00140802	0.317895	0.618776	0.00276299	0.137275	0.311581	Xenobiotics	Drug - Analgesics, Anesthetics
tramadol	-0.000255638	0.893748	0.959479	-0.00167535	0.174697	0.369058	Xenobiotics	Drug - Analgesics, Anesthetics
N-ethylglycinexylidide	-0.00314997	0.276213	0.580939	-0.00280873	0.220684	0.42651	Xenobiotics	Drug - Analgesics, Anesthetics
4-acetamidophenol	0.000401297	0.851341	0.951556	-0.0029772	0.244182	0.453946	Xenobiotics	Drug - Analgesics, Anesthetics
ibuprofen	0.000125168	0.827519	0.937567	0.000677709	0.316104	0.532888	Xenobiotics	Drug - Analgesics, Anesthetics
carboxyibuprofen	-0.00120046	0.577571	0.792236	-0.00132082	0.327908	0.545211	Xenobiotics	Drug - Analgesics, Anesthetics
4-acetamidophenylglucuronide	0.00318959	0.415473	0.686659	0.00306688	0.392901	0.597307	Xenobiotics	Drug - Analgesics, Anesthetics
N-desmethyl tramadol	0.000578369	0.748996	0.893785	-0.00134137	0.339805	0.551793	Xenobiotics	Drug - Analgesics, Anesthetics
O-desmethyltramadol	-6.81325e-05	0.971143	0.985247	-0.000802884	0.372382	0.576896	Xenobiotics	Drug - Analgesics, Anesthetics
ibuprofen acyl glucuronide	-0.000295936	0.802133	0.925939	-0.000730503	0.435701	0.628284	Xenobiotics	Drug - Analgesics, Anesthetics
4-acetaminophen sulfate	6.83412e-05	0.979901	0.987758	-0.00302725	0.446341	0.634193	Xenobiotics	Drug - Analgesics, Anesthetics
2-hydroxyibuprofen	-0.000695641	0.651055	0.836595	-0.000918113	0.493541	0.66717	Xenobiotics	Drug - Analgesics, Anesthetics
O-desmethyltramadol glucuronide	0.000439965	0.810799	0.930706	-0.00111489	0.501938	0.672004	Xenobiotics	Drug - Analgesics, Anesthetics
2-hydroxyacetaminophen sulfate*	0.000730575	0.740879	0.889055	-0.00194892	0.478571	0.658795	Xenobiotics	Drug - Analgesics, Anesthetics
2-methoxyacetaminophen sulfate*	0.00140932	0.515976	0.764583	0.000877736	0.677918	0.807699	Xenobiotics	Drug - Analgesics, Anesthetics
morphine-6-glucuronide	-0.00120538	0.337224	0.635194	-0.000373783	0.767495	0.863986	Xenobiotics	Drug - Analgesics, Anesthetics
3-(N-acetyl-L-cystein-S-yl) acetaminophen	0.00152108	0.554505	0.783772	0.000656001	0.797792	0.873148	Xenobiotics	Drug - Analgesics, Anesthetics
naproxen	0.00038031	0.868655	0.955125	-0.000292615	0.778093	0.867907	Xenobiotics	Drug - Analgesics, Anesthetics
lidocaine	-0.00237823	0.29685	0.597012	0.000717932	0.775264	0.867726	Xenobiotics	Drug - Analgesics, Anesthetics
2-methoxyacetaminophen glucuronide*	0.00178232	0.358651	0.644781	0.000165831	0.929876	0.967898	Xenobiotics	Drug - Analgesics, Anesthetics
morphine-3-glucuronide	-0.00132173	0.485159	0.741384	0.000517936	0.759462	0.859837	Xenobiotics	Drug - Analgesics, Anesthetics
4-aminophenol sulfate (2)	0.000459012	0.690051	0.857522	-0.000130565	0.898373	0.944841	Xenobiotics	Drug - Analgesics, Anesthetics
3-(cystein-S-yl)acetaminophen*	0.000374477	0.843294	0.947979	-8.59568e-05	0.957729	0.98036	Xenobiotics	Drug - Analgesics, Anesthetics
morphine	-0.000624233	0.643542	0.836099	-2.07901e-05	0.984059	0.988706	Xenobiotics	Drug - Analgesics, Anesthetics
linezolid	-0.000519915	0.64591	0.836099	-0.00432381	0.0641526	0.203052	Xenobiotics	Drug - Antibiotic
amoxicillin	-0.00139069	0.606231	0.811753	0.00316522	0.11116	0.276594	Xenobiotics	Drug - Antibiotic
clindamycin	0.000739562	0.599283	0.806187	-0.00284306	0.161336	0.348992	Xenobiotics	Drug - Antibiotic
meropenem	-0.00058672	0.804134	0.925939	-0.0026853	0.194029	0.396175	Xenobiotics	Drug - Antibiotic
ofloxacin	0.000261688	0.939977	0.973435	-0.00189741	0.255871	0.472079	Xenobiotics	Drug - Antibiotic
metronidazole	-0.00796829	0.310177	0.610369	-0.00158524	0.380636	0.58504	Xenobiotics	Drug - Antibiotic
moxifloxacin	-0.000425809	0.441047	0.706337	-0.00177886	0.407245	0.611658	Xenobiotics	Drug - Antibiotic
ceftazidime	-0.000186251	0.843271	0.947979	-0.000435148	0.434848	0.628284	Xenobiotics	Drug - Antibiotic
doxycycline	0.000609031	0.679709	0.85009	-0.000900472	0.490554	0.664253	Xenobiotics	Drug - Antibiotic
fluconazole	0.00326269	0.173059	0.505757	-0.000721372	0.540832	0.70663	Xenobiotics	Drug - Antibiotic
ciprofloxacin	-0.00232095	0.417546	0.687475	0.000402203	0.692735	0.816557	Xenobiotics	Drug - Antibiotic
cefazolin	0.000731834	0.647733	0.836099	0.000300075	0.744649	0.853411	Xenobiotics	Drug - Antibiotic
azithromycin	-0.000355025	0.654523	0.836763	8.56774e-05	0.946809	0.974774	Xenobiotics	Drug - Antibiotic
penicillin G	0	0		-0.00184589	0.178678	0.374226	Xenobiotics	Drug - Antibiotic
mycophenolic acid glucuronide	-0.00127951	0.433038	0.701638	-0.00282254	0.0690551	0.211278	Xenobiotics	Drug - Antiinflammatory, Immunosuppressant
mycophenolic acid	-0.00134484	0.411064	0.686659	-0.00272909	0.0685642	0.210542	Xenobiotics	Drug - Antiinflammatory, Immunosuppressant
prednisolone	0.00237787	0.244707	0.552709	3.63155e-05	0.945872	0.974774	Xenobiotics	Drug - Antiinflammatory, Immunosuppressant
lisinopril	0.0033395	0.0977223	0.379752	0.00299959	0.159586	0.347069	Xenobiotics	Drug - Cardiovascular
metoprolol acid metabolite*	0.00247866	0.413898	0.686659	-0.00250843	0.34837	0.558732	Xenobiotics	Drug - Cardiovascular
verapamil	-0.000176715	0.896355	0.959897	-0.000743502	0.337457	0.549754	Xenobiotics	Drug - Cardiovascular
milrinone*	-0.000288753	0.360589	0.647075	-0.000118077	0.372299	0.576896	Xenobiotics	Drug - Cardiovascular
metoprolol	0.00299825	0.0917845	0.379752	-0.000950117	0.529378	0.698023	Xenobiotics	Drug - Cardiovascular
alpha-hydroxymetoprolol	0.00159473	0.351924	0.642131	-0.000621071	0.653997	0.789976	Xenobiotics	Drug - Cardiovascular
candesartan	5.77541e-05	0.977664	0.987758	-0.000272808	0.851113	0.911798	Xenobiotics	Drug - Cardiovascular
valsartan	-0.00041272	0.8012	0.925939	-0.000416761	0.645286	0.782108	Xenobiotics	Drug - Cardiovascular
atenolol	-0.000107087	0.886516	0.959479	0	0		Xenobiotics	Drug - Cardiovascular
metoclopramide	-0.00255801	0.28008	0.582008	-0.00502977	0.0160742	0.101216	Xenobiotics	Drug - Gastrointestinal
pantoprazole	0.00459753	0.0947839	0.379752	-0.00509644	0.0422297	0.166867	Xenobiotics	Drug - Gastrointestinal
ranitidine	-0.00243553	0.178251	0.512734	-0.00143453	0.35609	0.565816	Xenobiotics	Drug - Gastrointestinal
ondansetron	0.00030651	0.864579	0.955125	-0.000362361	0.791669	0.872659	Xenobiotics	Drug - Gastrointestinal
famotidine	0.00166905	0.373501	0.656043	0.000422071	0.750471	0.858687	Xenobiotics	Drug - Gastrointestinal
p-hydroxyatorvastatin lactone	-0.00130709	0.205771	0.52645	-0.00221306	0.0465303	0.173334	Xenobiotics	Drug - Metabolic
o-hydroxyatorvastatin lactone	-0.00138492	0.377492	0.658833	-0.00232577	0.0562731	0.192074	Xenobiotics	Drug - Metabolic
atorvastatin lactone	-0.00190579	0.287902	0.59029	-0.00230212	0.0685987	0.210542	Xenobiotics	Drug - Metabolic
atorvastatin (lipitor)	-0.00168605	0.319133	0.61927	-0.00242102	0.0869289	0.240082	Xenobiotics	Drug - Metabolic
o-hydroxyatorvastatin	-0.00190647	0.293223	0.596199	-0.00256802	0.0976517	0.256222	Xenobiotics	Drug - Metabolic
allopurinol riboside	-0.000189359	0.87523	0.957466	0.00196063	0.256953	0.472493	Xenobiotics	Drug - Metabolic
p-hydroxyatorvastatin	-0.00121214	0.215581	0.532447	-0.00138633	0.236234	0.445965	Xenobiotics	Drug - Metabolic
oxypurinol	0.00230925	0.272474	0.577294	0.000906099	0.705048	0.827075	Xenobiotics	Drug - Metabolic
carbamazepine	0.0016821	0.289055	0.590446	0.00415612	0.056329	0.192074	Xenobiotics	Drug - Neurological
rocuronium	-0.00136027	0.398539	0.675681	-0.00246719	0.177178	0.372685	Xenobiotics	Drug - Neurological
carbamazepine 10,11-epoxide*	0.000636358	0.742261	0.889622	0.00136244	0.377067	0.582305	Xenobiotics	Drug - Neurological
homoveratric acid	1.33187e-05	0.959409	0.980462	-0.000371249	0.421994	0.624921	Xenobiotics	Drug - Neurological
valproate (2-propylpentanoate)	0.000163214	0.868685	0.955125	0.000909497	0.407354	0.611658	Xenobiotics	Drug - Neurological
2-propyl-4-pentenoate (4-ene-valproate)	-0.000100402	0.907555	0.961013	0.000526822	0.617687	0.765063	Xenobiotics	Drug - Neurological
carbamazepine glucuronide*	0.00228698	0.180383	0.514328	0.0005834	0.626014	0.769509	Xenobiotics	Drug - Neurological
3-hydroxyvalproate	-0.00093811	0.348938	0.641468	0.000372049	0.708226	0.827819	Xenobiotics	Drug - Neurological
2-propyl-2-pentenoate (2-ene-valproate)	-0.000637137	0.65181	0.836595	0.000380482	0.716132	0.831087	Xenobiotics	Drug - Neurological
pyridostigmine	0.000498379	0.828009	0.937567	0	0		Xenobiotics	Drug - Neurological
gabapentin	0.00016611	0.901522	0.959897	0.000241469	0.873733	0.927925	Xenobiotics	Drug - Neurological
lamotrigine	0	0		0.000484381	0.65008	0.786218	Xenobiotics	Drug - Neurological
fosfomycin	-0.0029407	0.0832992	0.355071	0.00198645	0.153848	0.34049	Xenobiotics	Drug - Other
S-carboxymethyl-L-cysteine	-0.00490812	0.0456806	0.282293	-0.0013158	0.49011	0.664253	Xenobiotics	Drug - Other
1-hydroxy-2-naphthalenecarboxylate	-0.000631304	0.763937	0.902332	0.000683002	0.707807	0.827819	Xenobiotics	Drug - Other
venlafaxine	-0.000836199	0.376307	0.65837	-0.00051064	0.356534	0.565816	Xenobiotics	Drug - Psychoactive
O-desmethylvenlafaxine	-0.000722964	0.332654	0.63172	-0.000600933	0.453907	0.640193	Xenobiotics	Drug - Psychoactive
escitalopram	0.000221453	0.913839	0.961885	-0.00119161	0.466332	0.652062	Xenobiotics	Drug - Psychoactive
paroxetine	0.00214982	0.0474307	0.288887	-6.87761e-05	0.615115	0.765063	Xenobiotics	Drug - Psychoactive
trazadone	0.00436027	0.0750052	0.346806	-0.000462744	0.75621	0.859837	Xenobiotics	Drug - Psychoactive
hydroxybupropion	-0.000155816	0.799487	0.925323	0	0		Xenobiotics	Drug - Psychoactive
fluoxetine	0.00319273	0.0600535	0.3254	0	0		Xenobiotics	Drug - Psychoactive
cetirizine	0.00197841	0.340833	0.636134	0.00047838	0.0986494	0.257438	Xenobiotics	Drug - Respiratory
pseudoephedrine	-0.000521942	0.405768	0.681857	-0.000553107	0.333876	0.54825	Xenobiotics	Drug - Respiratory
hydroquinone sulfate	0.00357061	0.13043	0.429401	-0.00472531	0.0232998	0.120321	Xenobiotics	Drug - Topical Agents
salicylate	-0.00234487	0.565581	0.786212	-0.00298158	0.290553	0.501943	Xenobiotics	Drug - Topical Agents
erythritol	-0.00194559	0.299727	0.597012	-0.00364152	0.0264571	0.129164	Xenobiotics	Food Component/Plant
N-(2-furoyl)glycine	0.00032263	0.914207	0.961885	-0.00395885	0.0828212	0.234695	Xenobiotics	Food Component/Plant
2-keto-3-deoxy-gluconate	-0.00177972	0.271876	0.577294	-0.00282938	0.0781457	0.228354	Xenobiotics	Food Component/Plant
naringenin 7-glucuronide	-0.000200851	0.826941	0.937567	-0.00171391	0.135763	0.30959	Xenobiotics	Food Component/Plant
2,3-dihydroxyisovalerate	-0.00021305	0.927878	0.964944	-0.00303554	0.189765	0.392717	Xenobiotics	Food Component/Plant
glucuronide of piperine metabolite C17H21NO3 (3)*	0.00193039	0.240364	0.552522	0.00208254	0.198381	0.399216	Xenobiotics	Food Component/Plant
acesulfame	-0.00120943	0.669576	0.846611	0.00302536	0.189921	0.392717	Xenobiotics	Food Component/Plant
sulfate of piperine metabolite C18H21NO3 (1)*	0.000688656	0.445099	0.706337	0.00228397	0.262286	0.474259	Xenobiotics	Food Component/Plant
glucuronide of piperine metabolite C17H21NO3 (5)*	0.00159028	0.26159	0.568522	0.00191828	0.258714	0.472493	Xenobiotics	Food Component/Plant
piperine	0.00418228	0.0992136	0.38076	0.00287404	0.257349	0.472493	Xenobiotics	Food Component/Plant
equol sulfate	0.000337403	0.799256	0.925323	0.000844382	0.330691	0.546058	Xenobiotics	Food Component/Plant
N-acetylalliin	0.000678139	0.488767	0.744571	-0.00118332	0.429158	0.628284	Xenobiotics	Food Component/Plant
methyl indole-3-acetate	-0.00477307	0.0740115	0.346176	-0.0021624	0.311131	0.52811	Xenobiotics	Food Component/Plant
sulfate of piperine metabolite C16H19NO3 (2)*	0.00218905	0.19368	0.524889	0.00164868	0.325666	0.543333	Xenobiotics	Food Component/Plant
S-allylcysteine	0.00203967	0.117509	0.410867	-0.00105214	0.380399	0.58504	Xenobiotics	Food Component/Plant
indolin-2-one	-0.00171186	0.402312	0.679553	-0.00147933	0.423278	0.624991	Xenobiotics	Food Component/Plant
quinate	0.00204492	0.548974	0.783772	-0.00206354	0.45352	0.640193	Xenobiotics	Food Component/Plant
ferulic acid 4-sulfate	0.00410875	0.0419834	0.27013	-0.00147526	0.486904	0.663713	Xenobiotics	Food Component/Plant
ergothioneine	0.000324903	0.899749	0.959897	0.0016974	0.446404	0.634193	Xenobiotics	Food Component/Plant
stachydrine	-0.00207318	0.515385	0.764583	-0.00199488	0.487972	0.664237	Xenobiotics	Food Component/Plant
sulfate of piperine metabolite C16H19NO3 (3)*	0.00217336	0.177349	0.512139	0.00125333	0.46332	0.648781	Xenobiotics	Food Component/Plant
homostachydrine*	0.00490954	0.0406543	0.27013	-0.00123887	0.611181	0.763232	Xenobiotics	Food Component/Plant
4-allylphenol sulfate	0.000875149	0.736156	0.887744	-0.0012656	0.58052	0.740097	Xenobiotics	Food Component/Plant
glucuronide of piperine metabolite C17H21NO3 (4)*	0.00226305	0.21539	0.532447	0.000999017	0.568803	0.729504	Xenobiotics	Food Component/Plant
3-hydroxystachydrine*	-0.00367451	0.308343	0.609211	-0.00132602	0.658555	0.792531	Xenobiotics	Food Component/Plant
phytanate	0.00419067	0.0380834	0.262293	-0.000924307	0.618204	0.765063	Xenobiotics	Food Component/Plant
1-kestose	-0.00453651	0.153657	0.465679	-0.00089109	0.684338	0.811113	Xenobiotics	Food Component/Plant
thymol sulfate	0.00353369	0.176091	0.512139	-0.00123607	0.611524	0.763232	Xenobiotics	Food Component/Plant
genistein sulfate*	-0.000679876	0.757988	0.899727	0.000315793	0.894642	0.942949	Xenobiotics	Food Component/Plant
beta-guanidinopropanoate	-0.00228814	0.240217	0.552522	-0.000707279	0.777393	0.867907	Xenobiotics	Food Component/Plant
dihydroferulic acid	0.00234276	0.250223	0.560132	-0.00021731	0.898071	0.944841	Xenobiotics	Food Component/Plant
saccharin	-0.00170028	0.545628	0.783772	-4.87291e-05	0.984654	0.988706	Xenobiotics	Food Component/Plant
4-ethylphenol glucuronide	-0.00101994	0.536682	0.781063	0.000374707	0.798	0.873148	Xenobiotics	Food Component/Plant
daidzein sulfate (2)	-8.29616e-05	0.968003	0.984556	-0.000626753	0.776826	0.867907	Xenobiotics	Food Component/Plant
alliin	0.000734264	0.566345	0.786212	0.00042013	0.8018	0.876324	Xenobiotics	Food Component/Plant
tartarate	-0.00424293	0.132837	0.431611	8.49702e-05	0.970196	0.981438	Xenobiotics	Food Component/Plant
2,8-quinolinediol sulfate	-0.00154049	0.342482	0.637995	0.000126016	0.941471	0.973385	Xenobiotics	Food Component/Plant
methyl glucopyranoside (alpha + beta)	0.00344915	0.183954	0.520742	0.00016001	0.946157	0.974774	Xenobiotics	Food Component/Plant
cinnamoylglycine	-0.00195479	0.583492	0.793679	-0.000168096	0.938881	0.973188	Xenobiotics	Food Component/Plant
eugenol sulfate	-0.000273128	0.907243	0.961013	-1.30901e-05	0.995327	0.996348	Xenobiotics	Food Component/Plant
cotinine	-0.00300453	0.357082	0.644781	0.00510398	0.0548612	0.192074	Xenobiotics	Tobacco Metabolite
norcotinine	-0.000369042	0.548911	0.783772	0.00131383	0.19986	0.401088	Xenobiotics	Tobacco Metabolite
cotinine N-oxide	-0.000512193	0.678855	0.85009	0.00119127	0.343466	0.554086	Xenobiotics	Tobacco Metabolite
hydroxycotinine	-0.00101006	0.648874	0.836099	0.00135566	0.428108	0.628284	Xenobiotics	Tobacco Metabolite
3-hydroxycotinine glucuronide	-0.000479132	0.722868	0.882153	0.000790753	0.598733	0.754754	Xenobiotics	Tobacco Metabolite
1-methylurate	-0.00203791	0.399329	0.675681	-0.00457322	0.0285091	0.131865	Xenobiotics	Xanthine Metabolism
1-methylxanthine	0.0033395	0.0977223	0.379752	0.00299959	0.159586	0.347069	Xenobiotics	Xanthine Metabolism
7-methylurate	0.00250391	0.255293	0.563604	-0.00234794	0.208805	0.412654	Xenobiotics	Xanthine Metabolism
3-methylxanthine	0.00207157	0.434716	0.702693	-0.00186291	0.363774	0.571756	Xenobiotics	Xanthine Metabolism
5-acetylamino-6-amino-3-methyluracil	0.00329813	0.19945	0.525109	-0.00156887	0.479875	0.659659	Xenobiotics	Xanthine Metabolism
1,7-dimethylurate	0.00338625	0.185991	0.520742	-0.00144265	0.482485	0.661383	Xenobiotics	Xanthine Metabolism
caffeine	0.00720932	0.00591999	0.105817	-0.00112069	0.657797	0.792531	Xenobiotics	Xanthine Metabolism
7-methylxanthine	0.00443111	0.0418366	0.27013	-0.000741512	0.730406	0.842643	Xenobiotics	Xanthine Metabolism
3,7-dimethylurate	4.54866e-05	0.975493	0.98659	-0.000518211	0.732156	0.843665	Xenobiotics	Xanthine Metabolism
theophylline	-0.000575252	0.884063	0.959479	-0.00102508	0.710507	0.829491	Xenobiotics	Xanthine Metabolism
1,3,7-trimethylurate	0.00465894	0.0554561	0.315366	-8.80636e-06	0.996458	0.996458	Xenobiotics	Xanthine Metabolism
1,3-dimethylurate	-0.00251762	0.482496	0.739626	9.82487e-05	0.968317	0.981438	Xenobiotics	Xanthine Metabolism
theobromine	0.0052242	0.0648646	0.328692	0.000284647	0.910301	0.951235	Xenobiotics	Xanthine Metabolism
Note: Results presented following mixed effects modeling of each of the 983 individual metabolites. For day 0, 3 and 7 repeated measures data, correlations between individual metabolites and absolute increase in 25(OH)D levels from day 0 to day 3 over time were determined separately in women (N=151) and in men (N=277) utilizing linear mixed effects models correcting for age, baseline 25(OH)D, abs…
