# Supplementary material for: Sex-Specific Catabolic Metabolism Alterations in the Critically Ill following High Dose Vitamin D
Source: Metabolites. 2022 Feb 25;12(3):207. doi: 10.3390/metabo12030207 (PMC8953844; doi:10.3390/metabo12030207)
Supplement: Supplementary file 1 [file metabolites-12-00207-s001.zip › Table S6.xlsx]

## Sheet: Significant at FCR 0.10
Metabolite	Beta Coefficient	p-value	q-value	Super Pathway	Sub Pathway
N-acetylleucine	-0.142179	0.0128471	0.0977567	Amino Acid	BCAA Metabolism
3-hydroxy-2-ethylpropionate	-0.16527	0.00288784	0.0424384	Amino Acid	BCAA Metabolism
3-hydroxyisobutyrate	-0.167694	0.00129859	0.0243986	Amino Acid	BCAA Metabolism
2-hydroxy-3-methylvalerate	-0.184203	0.0014425	0.025624	Amino Acid	BCAA Metabolism
isovalerate (C5)	-0.193943	0.00308125	0.0441285	Amino Acid	BCAA Metabolism
beta-hydroxyisovalerate	-0.206641	0.000308072	0.00940581	Amino Acid	BCAA Metabolism
2,3-dihydroxy-2-methylbutyrate	-0.231973	0.00484542	0.0570358	Amino Acid	BCAA Metabolism
malonylcarnitine (C3-DC)	-0.164294	0.0087978	0.0760659	Lipid	Short-chain Acylcarnitine
propionylcarnitine (C3)	-0.2051	0.00367162	0.049533	Lipid	Short-chain Acylcarnitine
2-methylmalonylcarnitine (C4-DC)	-0.279054	0.000293929	0.00926352	Lipid	Short-chain Acylcarnitine
succinylcarnitine (C4-DC)	-0.257327	8.00979e-05	0.00429708	Energy	Short-chain Acylcarnitine
isovalerylcarnitine (C5)	-0.229387	0.00144055	0.025624	Amino Acid	Short-chain Acylcarnitine
glutaroylcarnitine (C5)	-0.280074	6.34414e-05	0.00367369	Amino Acid	Short-chain Acylcarnitine
tiglyl carnitine (C5)	-0.353071	1.32872e-06	0.000259632	Amino Acid	Short-chain Acylcarnitine
2-methylbutyroylcarnitine (C5)	-0.308718	2.23165e-05	0.00167717	Amino Acid	Short-chain Acylcarnitine
3-methyladipoylcarnitine (C7-DC)	-0.212409	0.00686847	0.0671049	Lipid	Short-chain Acylcarnitine
sphingomyelin (d17:1/14:0, d16:1/15:0)*	0.284567	3.63278e-05	0.00253516	Lipid	Sphingomyelins
sphingomyelin (d17:2/16:0, d18:2/15:0)*	0.279915	1.41809e-05	0.00125952	Lipid	Sphingomyelins
sphingomyelin (d18:2/14:0, d18:1/14:1)*	0.244636	8.35665e-05	0.00429708	Lipid	Sphingomyelins
sphingomyelin (d18:1/19:0, d19:1/18:0)*	0.202312	0.000632435	0.0154472	Lipid	Sphingomyelins
sphingomyelin (d18:2/21:0, d16:2/23:0)*	0.195992	0.000997815	0.021272	Lipid	Sphingomyelins
sphingomyelin (d18:1/21:0, d17:1/22:0, d16:1/23:0)*	0.191834	0.00370103	0.049533	Lipid	Sphingomyelins
sphingomyelin (d17:1/16:0, d18:1/15:0, d16:1/17:0)*	0.181268	0.00023669	0.00819431	Lipid	Sphingomyelins
sphingomyelin (d18:2/18:1)*	0.172967	0.00103992	0.021272	Lipid	Sphingomyelins
sphingomyelin (d18:1/17:0, d17:1/18:0, d19:1/16:0)	0.171641	0.000553014	0.0150082	Lipid	Sphingomyelins
sphingomyelin (d18:2/23:0, d18:1/23:1, d17:1/24:1)*	0.171284	0.0041796	0.0529746	Lipid	Sphingomyelins
sphingomyelin (d18:2/23:1)*	0.146414	0.00524119	0.0584332	Lipid	Sphingomyelins
sphingomyelin (d18:1/18:1, d18:2/18:0)	0.144498	0.0053828	0.0584332	Lipid	Sphingomyelins
sphingomyelin (d18:1/14:0, d16:1/16:0)*	0.118489	0.0128838	0.0977567	Lipid	Sphingomyelins
glycine	0.125844	0.00198164	0.0328146	Amino Acid	Glycine, Serine and Threonine Metabolism
N-palmitoyl-heptadecasphingosine (d17:1/16:0)*	0.170683	0.000239868	0.00819431	Lipid	Ceramide
ceramide (d18:1/17:0, d17:1/18:0)*	0.132846	0.0113215	0.0929501	Lipid	Ceramide
ceramide (d18:1/14:0, d16:1/16:0)*	0.124902	0.0102964	0.0859789	Lipid	Ceramide
N-palmitoyl-sphingadienine (d18:2/16:0)*	0.10764	0.00870976	0.0760659	Lipid	Ceramide
glycerol	0.174727	0.00230798	0.0357502	Lipid	Glycerolipid Metabolism
pentadecanoate (15:0)	0.138872	0.00777753	0.0730639	Lipid	Long Chain Fatty Acid
1-linolenoyl-GPC (18:3)*	0.192365	0.000788622	0.0187923	Lipid	Lysophosphatidylcholine
1-palmitoleoyl-GPC* (16:1)*	0.138064	0.013036	0.0979706	Lipid	Lysophosphatidylcholine
1-palmitoyl-GPC (16:0)	0.112984	0.00820506	0.0749191	Lipid	Lysophosphatidylcholine
1-oleoyl-GPC (18:1)	0.0990456	0.00963337	0.0818963	Lipid	Lysophosphatidylcholine
1-linoleoyl-GPA (18:2)*	0.180613	0.0096398	0.0818963	Lipid	Lysophospholipid
1-stearoyl-GPE (18:0)	0.15978	0.00127482	0.0243986	Lipid	Lysophospholipid
1-linoleoyl-GPE (18:2)*	0.159051	0.00311655	0.0441285	Lipid	Lysophospholipid
1-arachidonoyl-GPE (20:4n6)*	0.157753	0.00359732	0.0495011	Lipid	Lysophospholipid
1-palmitoyl-GPE (16:0)	0.134009	0.0055566	0.0596571	Lipid	Lysophospholipid
1-myristoyl-2-arachidonoyl-GPC (14:0/20:4)*	0.205164	0.00433773	0.0529746	Lipid	Phosphatidylcholine
1-palmitoleoyl-2-linolenoyl-GPC (16:1/18:3)*	0.192714	0.00531033	0.0584332	Lipid	Phosphatidylcholine
1-(1-enyl-stearoyl)-2-linoleoyl-GPE (P-18:0/18:2)*	0.149647	0.00806985	0.0743797	Lipid	Plasmalogen
linolenate (18:3n3 or 3n6)	0.160014	0.0128496	0.0977567	Lipid	Polyunsaturated Fatty Acid (n3 and n6)
hexadecasphingosine (d16:1)*	0.169729	0.00496447	0.0576922	Lipid	Sphingosines
gamma-glutamylglycine	0.147888	0.0104647	0.0866442	Peptide	Gamma-glutamyl Amino Acid
prednisolone	0.156979	0.0129075	0.0977567	Xenobiotics	Drug - Antiinflammatory, Immunosuppressant
N-acetylalanine	-0.12882	0.00684136	0.0671049	Amino Acid	Alanine and Aspartate Metabolism
creatinine	-0.271327	1.30955e-08	4.26478e-06	Amino Acid	Creatine Metabolism
alpha-ketoglutaramate*	-0.183079	0.00103457	0.021272	Amino Acid	Glutamate Metabolism
N-acetyl-aspartyl-glutamate (NAAG)	-0.273811	0.000211115	0.00793306	Amino Acid	Glutamate Metabolism
pyroglutamine*	-0.501408	1.4209e-09	6.94109e-07	Amino Acid	Glutamate Metabolism
N-acetylserine	-0.158368	0.0047484	0.056974	Amino Acid	Glycine, Serine and Threonine Metabolism
N-acetylthreonine	-0.167163	0.00213798	0.0345299	Amino Acid	Glycine, Serine and Threonine Metabolism
guanidinosuccinate	-0.264923	0.00429868	0.0529746	Amino Acid	Guanidino and Acetamido Metabolism
4-guanidinobutanoate	-0.29742	6.3923e-05	0.00367369	Amino Acid	Guanidino and Acetamido Metabolism
1-methylguanidine	-0.310794	0.00104509	0.021272	Amino Acid	Guanidino and Acetamido Metabolism
1-ribosyl-imidazoleacetate*	-0.182166	0.00409615	0.0526571	Amino Acid	Histidine Metabolism
hydantoin-5-propionic acid	-0.206983	0.0127194	0.0977567	Amino Acid	Histidine Metabolism
imidazole lactate	-0.228991	8.81691e-05	0.00430706	Amino Acid	Histidine Metabolism
formiminoglutamate	-0.261795	0.0012435	0.024298	Amino Acid	Histidine Metabolism
N-acetyl-1-methylhistidine*	-0.268524	0.00870627	0.0760659	Amino Acid	Histidine Metabolism
N-acetylcarnosine	-0.415674	1.37123e-09	6.94109e-07	Amino Acid	Histidine Metabolism
N6,N6,N6-trimethyllysine	-0.262808	5.50017e-06	0.000544328	Amino Acid	Lysine Metabolism
cysteine	-0.127158	0.0114793	0.0934604	Amino Acid	Methionine, Cysteine, SAM and Taurine Metabolism
S-adenosylhomocysteine (SAH)	-0.209678	0.000988579	0.021272	Amino Acid	Methionine, Cysteine, SAM and Taurine Metabolism
lanthionine	-0.242219	0.000595318	0.0153059	Amino Acid	Methionine, Cysteine, SAM and Taurine Metabolism
5-methylthioribose	-0.255319	0.000549205	0.0150082	Amino Acid	Methionine, Cysteine, SAM and Taurine Metabolism
N-acetylphenylalanine	-0.218357	0.00537631	0.0584332	Amino Acid	Phenylalanine Metabolism
5-methylthioadenosine (MTA)	-0.147346	0.00851889	0.0760659	Amino Acid	Polyamine Metabolism
acisoga	-0.175778	0.0123798	0.0977567	Amino Acid	Polyamine Metabolism
(N(1) + N(8))-acetylspermidine	-0.21818	0.000457069	0.013532	Amino Acid	Polyamine Metabolism
octanoylcarnitine (C8)	-0.187537	0.00681872	0.0671049	Lipid	Medium-chain Acylcarnitine
decanoylcarnitine (C10)	-0.185862	0.0043321	0.0529746	Lipid	Medium-chain Acylcarnitine
cis-4-decenoylcarnitine (C10:1)	-0.199637	0.00291031	0.0424384	Lipid	Medium-chain Acylcarnitine
indolelactate	-0.18192	0.00156244	0.0267807	Amino Acid	Tryptophan Metabolism
indoleacetate	-0.192265	0.00592887	0.0625265	Amino Acid	Tryptophan Metabolism
N-formylanthranilic acid	-0.213501	0.00188572	0.0317647	Amino Acid	Tryptophan Metabolism
kynurenate	-0.250467	0.00838013	0.0758091	Amino Acid	Tryptophan Metabolism
picolinate	-0.269129	0.00155336	0.0267807	Amino Acid	Tryptophan Metabolism
N-acetylkynurenine (2)	-0.291125	0.00236633	0.0357502	Amino Acid	Tryptophan Metabolism
3-(4-hydroxyphenyl)lactate (HPLA)	-0.178313	0.00393276	0.0512307	Amino Acid	Tyrosine Metabolism
2-hydroxyphenylacetate	-0.185433	0.00744248	0.0705952	Amino Acid	Tyrosine Metabolism
homovanillate sulfate	-0.240667	0.00875038	0.0760659	Amino Acid	Tyrosine Metabolism
N-acetyltyrosine	-0.251103	0.000530061	0.0150082	Amino Acid	Tyrosine Metabolism
3-hydroxyproline	-0.101028	0.0121893	0.0976144	Amino Acid	Urea cycle; Arginine and Proline Metabolism
2-oxoarginine*	-0.194139	0.00215591	0.0345299	Amino Acid	Urea cycle; Arginine and Proline Metabolism
urea	-0.194151	0.00136812	0.02522	Amino Acid	Urea cycle; Arginine and Proline Metabolism
N-acetylcitrulline	-0.250417	0.00657246	0.0671049	Amino Acid	Urea cycle; Arginine and Proline Metabolism
argininate*	-0.284203	6.36185e-05	0.00367369	Amino Acid	Urea cycle; Arginine and Proline Metabolism
N-acetylneuraminate	-0.146027	0.00976282	0.0822265	Carbohydrate	Aminosugar Metabolism
N-acetylglucosaminylasparagine	-0.179484	0.00740788	0.0705952	Carbohydrate	Aminosugar Metabolism
sedoheptulose	-0.176522	0.0121417	0.0976144	Carbohydrate	Pentose Metabolism
pyridoxate	-0.310897	0.00681096	0.0671049	Cofactors and Vitamins	Vitamin B6 Metabolism
2-methylcitrate/homocitrate	-0.281608	0.000621077	0.0154472	Energy	TCA Cycle
5alpha-androstan-3alpha,17beta-diol monosulfate (2)	-0.138748	0.00377989	0.0499048	Lipid	Androgenic Steroids
5alpha-androstan-3beta,17beta-diol disulfate	-0.388933	3.50465e-06	0.000489148	Lipid	Androgenic Steroids
5alpha-androstan-3beta,17alpha-diol disulfate	-0.435919	2.0248e-05	0.00164852	Lipid	Androgenic Steroids
5alpha-androstan-3alpha,17beta-diol disulfate	-0.473093	9.35771e-08	2.28562e-05	Lipid	Androgenic Steroids
deoxycarnitine	-0.203984	0.000183326	0.0074629	Lipid	Carnitine Metabolism
3-carboxy-4-methyl-5-propyl-2-furanpropanoate (CMPF)	-0.269548	0.00595186	0.0625265	Lipid	Fatty Acid, Dicarboxylate
1-(1-enyl-palmitoyl)-2-palmitoyl-GPC (P-16:0/16:0)*	-0.00414329	0.000243229	0.00819431	Lipid	Plasmalogen
pregnen-diol disulfate*	-0.26057	0.000590622	0.0153059	Lipid	Pregnenolone Steroids
glycochenodeoxycholate sulfate	-0.349163	0.00013307	0.00619092	Lipid	Primary Bile Acid Metabolism
glycochenodeoxycholate glucuronide (1)	-0.39213	5.57142e-06	0.000544328	Lipid	Primary Bile Acid Metabolism
glycolithocholate sulfate*	-0.284569	0.00508138	0.0577269	Lipid	Secondary Bile Acid Metabolism
glycodeoxycholate sulfate	-0.302985	0.00237847	0.0357502	Lipid	Secondary Bile Acid Metabolism
glycocholenate sulfate*	-0.316299	1.88027e-06	0.000306171	Lipid	Secondary Bile Acid Metabolism
taurocholenate sulfate*	-0.333131	0.000196901	0.0076949	Lipid	Secondary Bile Acid Metabolism
3beta-hydroxy-5-cholestenoate	-0.166543	0.00631309	0.0656158	Lipid	Sterol
allantoin	-0.142418	0.00223913	0.0352844	Nucleotide	Purine Metabolism
adenosine	-0.1841	0.00733504	0.0705952	Nucleotide	Purine Metabolism
N2,N2-dimethylguanosine	-0.191605	0.0068111	0.0671049	Nucleotide	Purine Metabolism
N6-carbamoylthreonyladenosine	-0.209047	0.000990821	0.021272	Nucleotide	Purine Metabolism
N1-methylinosine	-0.221145	0.00116088	0.0231466	Nucleotide	Purine Metabolism
xanthosine	-0.227366	0.000997418	0.021272	Nucleotide	Purine Metabolism
2'-O-methylcytidine	-0.142006	0.00325344	0.0454087	Nucleotide	Pyrimidine Metabolism
3-methylcytidine	-0.176578	0.00478185	0.056974	Nucleotide	Pyrimidine Metabolism
orotidine	-0.407635	0.00501928	0.0576922	Nucleotide	Pyrimidine Metabolism
gamma-glutamylisoleucine*	-0.134842	0.0126445	0.0977567	Peptide	Gamma-glutamyl Amino Acid
ectoine	-0.362825	0.000159846	0.00679	Xenobiotics	Chemical
umbelliferone sulfate	-0.00628241	0.000153857	0.00679	Xenobiotics	Food Component/Plant
2-keto-3-deoxy-gluconate	-0.144714	0.00800956	0.0743797	Xenobiotics	Food Component/Plant
methyl indole-3-acetate	-0.312238	0.000259244	0.0084427	Xenobiotics	Food Component/Plant
beta-guanidinopropanoate	-0.413606	4.90995e-06	0.000544328	Xenobiotics	Food Component/Plant
Note: Significant subanalysis results presented following mixed effects modeling of each of the 983 individual metabolites in a responder cohort of patients who received high dose vitamin D3 intervention and had an increase in 25(OH)D ≥ 7.5 ng/ml from day 0 to day 3. In day 0, 3 and 7 repeated measures data we determined correlations between individual metabolites over time relative to sex (as th…

## Sheet: All Data
Metabolite	Beta Coefficient	p-value	q-value	Super Pathway	Sub Pathway
N-acetylleucine	-0.142179	0.0128471	0.0977567	Amino Acid	BCAA Metabolism
3-hydroxy-2-ethylpropionate	-0.16527	0.00288784	0.0424384	Amino Acid	BCAA Metabolism
3-hydroxyisobutyrate	-0.167694	0.00129859	0.0243986	Amino Acid	BCAA Metabolism
2-hydroxy-3-methylvalerate	-0.184203	0.0014425	0.025624	Amino Acid	BCAA Metabolism
isovalerate (C5)	-0.193943	0.00308125	0.0441285	Amino Acid	BCAA Metabolism
beta-hydroxyisovalerate	-0.206641	0.000308072	0.00940581	Amino Acid	BCAA Metabolism
2,3-dihydroxy-2-methylbutyrate	-0.231973	0.00484542	0.0570358	Amino Acid	BCAA Metabolism
malonylcarnitine (C3-DC)	-0.164294	0.0087978	0.0760659	Lipid	Short-chain Acylcarnitine
propionylcarnitine (C3)	-0.2051	0.00367162	0.049533	Lipid	Short-chain Acylcarnitine
2-methylmalonylcarnitine (C4-DC)	-0.279054	0.000293929	0.00926352	Lipid	Short-chain Acylcarnitine
succinylcarnitine (C4-DC)	-0.257327	8.00979e-05	0.00429708	Energy	Short-chain Acylcarnitine
isovalerylcarnitine (C5)	-0.229387	0.00144055	0.025624	Amino Acid	Short-chain Acylcarnitine
glutaroylcarnitine (C5)	-0.280074	6.34414e-05	0.00367369	Amino Acid	Short-chain Acylcarnitine
tiglyl carnitine (C5)	-0.353071	1.32872e-06	0.000259632	Amino Acid	Short-chain Acylcarnitine
2-methylbutyroylcarnitine (C5)	-0.308718	2.23165e-05	0.00167717	Amino Acid	Short-chain Acylcarnitine
3-methyladipoylcarnitine (C7-DC)	-0.212409	0.00686847	0.0671049	Lipid	Short-chain Acylcarnitine
sphingomyelin (d17:1/14:0, d16:1/15:0)*	0.284567	3.63278e-05	0.00253516	Lipid	Sphingomyelins
sphingomyelin (d17:2/16:0, d18:2/15:0)*	0.279915	1.41809e-05	0.00125952	Lipid	Sphingomyelins
sphingomyelin (d18:2/14:0, d18:1/14:1)*	0.244636	8.35665e-05	0.00429708	Lipid	Sphingomyelins
sphingomyelin (d18:1/19:0, d19:1/18:0)*	0.202312	0.000632435	0.0154472	Lipid	Sphingomyelins
sphingomyelin (d18:2/21:0, d16:2/23:0)*	0.195992	0.000997815	0.021272	Lipid	Sphingomyelins
sphingomyelin (d18:1/21:0, d17:1/22:0, d16:1/23:0)*	0.191834	0.00370103	0.049533	Lipid	Sphingomyelins
sphingomyelin (d17:1/16:0, d18:1/15:0, d16:1/17:0)*	0.181268	0.00023669	0.00819431	Lipid	Sphingomyelins
sphingomyelin (d18:2/18:1)*	0.172967	0.00103992	0.021272	Lipid	Sphingomyelins
sphingomyelin (d18:1/17:0, d17:1/18:0, d19:1/16:0)	0.171641	0.000553014	0.0150082	Lipid	Sphingomyelins
sphingomyelin (d18:2/23:0, d18:1/23:1, d17:1/24:1)*	0.171284	0.0041796	0.0529746	Lipid	Sphingomyelins
sphingomyelin (d18:2/23:1)*	0.146414	0.00524119	0.0584332	Lipid	Sphingomyelins
sphingomyelin (d18:1/18:1, d18:2/18:0)	0.144498	0.0053828	0.0584332	Lipid	Sphingomyelins
sphingomyelin (d18:1/14:0, d16:1/16:0)*	0.118489	0.0128838	0.0977567	Lipid	Sphingomyelins
glycine	0.125844	0.00198164	0.0328146	Amino Acid	Glycine, Serine and Threonine Metabolism
N-palmitoyl-heptadecasphingosine (d17:1/16:0)*	0.170683	0.000239868	0.00819431	Lipid	Ceramide
ceramide (d18:1/17:0, d17:1/18:0)*	0.132846	0.0113215	0.0929501	Lipid	Ceramide
ceramide (d18:1/14:0, d16:1/16:0)*	0.124902	0.0102964	0.0859789	Lipid	Ceramide
N-palmitoyl-sphingadienine (d18:2/16:0)*	0.10764	0.00870976	0.0760659	Lipid	Ceramide
glycerol	0.174727	0.00230798	0.0357502	Lipid	Glycerolipid Metabolism
pentadecanoate (15:0)	0.138872	0.00777753	0.0730639	Lipid	Long Chain Fatty Acid
1-linolenoyl-GPC (18:3)*	0.192365	0.000788622	0.0187923	Lipid	Lysophosphatidylcholine
1-palmitoleoyl-GPC* (16:1)*	0.138064	0.013036	0.0979706	Lipid	Lysophosphatidylcholine
1-palmitoyl-GPC (16:0)	0.112984	0.00820506	0.0749191	Lipid	Lysophosphatidylcholine
1-oleoyl-GPC (18:1)	0.0990456	0.00963337	0.0818963	Lipid	Lysophosphatidylcholine
1-linoleoyl-GPA (18:2)*	0.180613	0.0096398	0.0818963	Lipid	Lysophospholipid
1-stearoyl-GPE (18:0)	0.15978	0.00127482	0.0243986	Lipid	Lysophospholipid
1-linoleoyl-GPE (18:2)*	0.159051	0.00311655	0.0441285	Lipid	Lysophospholipid
1-arachidonoyl-GPE (20:4n6)*	0.157753	0.00359732	0.0495011	Lipid	Lysophospholipid
1-palmitoyl-GPE (16:0)	0.134009	0.0055566	0.0596571	Lipid	Lysophospholipid
1-myristoyl-2-arachidonoyl-GPC (14:0/20:4)*	0.205164	0.00433773	0.0529746	Lipid	Phosphatidylcholine
1-palmitoleoyl-2-linolenoyl-GPC (16:1/18:3)*	0.192714	0.00531033	0.0584332	Lipid	Phosphatidylcholine
1-(1-enyl-stearoyl)-2-linoleoyl-GPE (P-18:0/18:2)*	0.149647	0.00806985	0.0743797	Lipid	Plasmalogen
linolenate (18:3n3 or 3n6)	0.160014	0.0128496	0.0977567	Lipid	Polyunsaturated Fatty Acid (n3 and n6)
hexadecasphingosine (d16:1)*	0.169729	0.00496447	0.0576922	Lipid	Sphingosines
gamma-glutamylglycine	0.147888	0.0104647	0.0866442	Peptide	Gamma-glutamyl Amino Acid
prednisolone	0.156979	0.0129075	0.0977567	Xenobiotics	Drug - Antiinflammatory, Immunosuppressant
N-acetylalanine	-0.12882	0.00684136	0.0671049	Amino Acid	Alanine and Aspartate Metabolism
creatinine	-0.271327	1.30955e-08	4.26478e-06	Amino Acid	Creatine Metabolism
alpha-ketoglutaramate*	-0.183079	0.00103457	0.021272	Amino Acid	Glutamate Metabolism
N-acetyl-aspartyl-glutamate (NAAG)	-0.273811	0.000211115	0.00793306	Amino Acid	Glutamate Metabolism
pyroglutamine*	-0.501408	1.4209e-09	6.94109e-07	Amino Acid	Glutamate Metabolism
N-acetylserine	-0.158368	0.0047484	0.056974	Amino Acid	Glycine, Serine and Threonine Metabolism
N-acetylthreonine	-0.167163	0.00213798	0.0345299	Amino Acid	Glycine, Serine and Threonine Metabolism
guanidinosuccinate	-0.264923	0.00429868	0.0529746	Amino Acid	Guanidino and Acetamido Metabolism
4-guanidinobutanoate	-0.29742	6.3923e-05	0.00367369	Amino Acid	Guanidino and Acetamido Metabolism
1-methylguanidine	-0.310794	0.00104509	0.021272	Amino Acid	Guanidino and Acetamido Metabolism
1-ribosyl-imidazoleacetate*	-0.182166	0.00409615	0.0526571	Amino Acid	Histidine Metabolism
hydantoin-5-propionic acid	-0.206983	0.0127194	0.0977567	Amino Acid	Histidine Metabolism
imidazole lactate	-0.228991	8.81691e-05	0.00430706	Amino Acid	Histidine Metabolism
formiminoglutamate	-0.261795	0.0012435	0.024298	Amino Acid	Histidine Metabolism
N-acetyl-1-methylhistidine*	-0.268524	0.00870627	0.0760659	Amino Acid	Histidine Metabolism
N-acetylcarnosine	-0.415674	1.37123e-09	6.94109e-07	Amino Acid	Histidine Metabolism
N6,N6,N6-trimethyllysine	-0.262808	5.50017e-06	0.000544328	Amino Acid	Lysine Metabolism
cysteine	-0.127158	0.0114793	0.0934604	Amino Acid	Methionine, Cysteine, SAM and Taurine Metabolism
S-adenosylhomocysteine (SAH)	-0.209678	0.000988579	0.021272	Amino Acid	Methionine, Cysteine, SAM and Taurine Metabolism
lanthionine	-0.242219	0.000595318	0.0153059	Amino Acid	Methionine, Cysteine, SAM and Taurine Metabolism
5-methylthioribose	-0.255319	0.000549205	0.0150082	Amino Acid	Methionine, Cysteine, SAM and Taurine Metabolism
N-acetylphenylalanine	-0.218357	0.00537631	0.0584332	Amino Acid	Phenylalanine Metabolism
5-methylthioadenosine (MTA)	-0.147346	0.00851889	0.0760659	Amino Acid	Polyamine Metabolism
acisoga	-0.175778	0.0123798	0.0977567	Amino Acid	Polyamine Metabolism
(N(1) + N(8))-acetylspermidine	-0.21818	0.000457069	0.013532	Amino Acid	Polyamine Metabolism
octanoylcarnitine (C8)	-0.187537	0.00681872	0.0671049	Lipid	Medium-chain Acylcarnitine
decanoylcarnitine (C10)	-0.185862	0.0043321	0.0529746	Lipid	Medium-chain Acylcarnitine
cis-4-decenoylcarnitine (C10:1)	-0.199637	0.00291031	0.0424384	Lipid	Medium-chain Acylcarnitine
indolelactate	-0.18192	0.00156244	0.0267807	Amino Acid	Tryptophan Metabolism
indoleacetate	-0.192265	0.00592887	0.0625265	Amino Acid	Tryptophan Metabolism
N-formylanthranilic acid	-0.213501	0.00188572	0.0317647	Amino Acid	Tryptophan Metabolism
kynurenate	-0.250467	0.00838013	0.0758091	Amino Acid	Tryptophan Metabolism
picolinate	-0.269129	0.00155336	0.0267807	Amino Acid	Tryptophan Metabolism
N-acetylkynurenine (2)	-0.291125	0.00236633	0.0357502	Amino Acid	Tryptophan Metabolism
3-(4-hydroxyphenyl)lactate (HPLA)	-0.178313	0.00393276	0.0512307	Amino Acid	Tyrosine Metabolism
2-hydroxyphenylacetate	-0.185433	0.00744248	0.0705952	Amino Acid	Tyrosine Metabolism
homovanillate sulfate	-0.240667	0.00875038	0.0760659	Amino Acid	Tyrosine Metabolism
N-acetyltyrosine	-0.251103	0.000530061	0.0150082	Amino Acid	Tyrosine Metabolism
3-hydroxyproline	-0.101028	0.0121893	0.0976144	Amino Acid	Urea cycle; Arginine and Proline Metabolism
2-oxoarginine*	-0.194139	0.00215591	0.0345299	Amino Acid	Urea cycle; Arginine and Proline Metabolism
urea	-0.194151	0.00136812	0.02522	Amino Acid	Urea cycle; Arginine and Proline Metabolism
N-acetylcitrulline	-0.250417	0.00657246	0.0671049	Amino Acid	Urea cycle; Arginine and Proline Metabolism
argininate*	-0.284203	6.36185e-05	0.00367369	Amino Acid	Urea cycle; Arginine and Proline Metabolism
N-acetylneuraminate	-0.146027	0.00976282	0.0822265	Carbohydrate	Aminosugar Metabolism
N-acetylglucosaminylasparagine	-0.179484	0.00740788	0.0705952	Carbohydrate	Aminosugar Metabolism
sedoheptulose	-0.176522	0.0121417	0.0976144	Carbohydrate	Pentose Metabolism
pyridoxate	-0.310897	0.00681096	0.0671049	Cofactors and Vitamins	Vitamin B6 Metabolism
2-methylcitrate/homocitrate	-0.281608	0.000621077	0.0154472	Energy	TCA Cycle
5alpha-androstan-3alpha,17beta-diol monosulfate (2)	-0.138748	0.00377989	0.0499048	Lipid	Androgenic Steroids
5alpha-androstan-3beta,17beta-diol disulfate	-0.388933	3.50465e-06	0.000489148	Lipid	Androgenic Steroids
5alpha-androstan-3beta,17alpha-diol disulfate	-0.435919	2.0248e-05	0.00164852	Lipid	Androgenic Steroids
5alpha-androstan-3alpha,17beta-diol disulfate	-0.473093	9.35771e-08	2.28562e-05	Lipid	Androgenic Steroids
deoxycarnitine	-0.203984	0.000183326	0.0074629	Lipid	Carnitine Metabolism
3-carboxy-4-methyl-5-propyl-2-furanpropanoate (CMPF)	-0.269548	0.00595186	0.0625265	Lipid	Fatty Acid, Dicarboxylate
1-(1-enyl-palmitoyl)-2-palmitoyl-GPC (P-16:0/16:0)*	-0.00414329	0.000243229	0.00819431	Lipid	Plasmalogen
pregnen-diol disulfate*	-0.26057	0.000590622	0.0153059	Lipid	Pregnenolone Steroids
glycochenodeoxycholate sulfate	-0.349163	0.00013307	0.00619092	Lipid	Primary Bile Acid Metabolism
glycochenodeoxycholate glucuronide (1)	-0.39213	5.57142e-06	0.000544328	Lipid	Primary Bile Acid Metabolism
glycolithocholate sulfate*	-0.284569	0.00508138	0.0577269	Lipid	Secondary Bile Acid Metabolism
glycodeoxycholate sulfate	-0.302985	0.00237847	0.0357502	Lipid	Secondary Bile Acid Metabolism
glycocholenate sulfate*	-0.316299	1.88027e-06	0.000306171	Lipid	Secondary Bile Acid Metabolism
taurocholenate sulfate*	-0.333131	0.000196901	0.0076949	Lipid	Secondary Bile Acid Metabolism
3beta-hydroxy-5-cholestenoate	-0.166543	0.00631309	0.0656158	Lipid	Sterol
allantoin	-0.142418	0.00223913	0.0352844	Nucleotide	Purine Metabolism
adenosine	-0.1841	0.00733504	0.0705952	Nucleotide	Purine Metabolism
N2,N2-dimethylguanosine	-0.191605	0.0068111	0.0671049	Nucleotide	Purine Metabolism
N6-carbamoylthreonyladenosine	-0.209047	0.000990821	0.021272	Nucleotide	Purine Metabolism
N1-methylinosine	-0.221145	0.00116088	0.0231466	Nucleotide	Purine Metabolism
xanthosine	-0.227366	0.000997418	0.021272	Nucleotide	Purine Metabolism
2'-O-methylcytidine	-0.142006	0.00325344	0.0454087	Nucleotide	Pyrimidine Metabolism
3-methylcytidine	-0.176578	0.00478185	0.056974	Nucleotide	Pyrimidine Metabolism
orotidine	-0.407635	0.00501928	0.0576922	Nucleotide	Pyrimidine Metabolism
gamma-glutamylisoleucine*	-0.134842	0.0126445	0.0977567	Peptide	Gamma-glutamyl Amino Acid
ectoine	-0.362825	0.000159846	0.00679	Xenobiotics	Chemical
umbelliferone sulfate	-0.00628241	0.000153857	0.00679	Xenobiotics	Food Component/Plant
2-keto-3-deoxy-gluconate	-0.144714	0.00800956	0.0743797	Xenobiotics	Food Component/Plant
methyl indole-3-acetate	-0.312238	0.000259244	0.0084427	Xenobiotics	Food Component/Plant
beta-guanidinopropanoate	-0.413606	4.90995e-06	0.000544328	Xenobiotics	Food Component/Plant
aspartate	0.0973757	0.128037	0.346517	Amino Acid	Alanine and Aspartate Metabolism
N-acetylaspartate (NAA)	0.0339142	0.504884	0.718008	Amino Acid	Alanine and Aspartate Metabolism
alanine	0.0291747	0.51826	0.72806	Amino Acid	Alanine and Aspartate Metabolism
ethylmalonate	0.037146	0.549545	0.749785	Amino Acid	BCAA Metabolism
creatine	0.101616	0.0943641	0.300305	Amino Acid	Creatine Metabolism
glutamine	0.0677471	0.0997584	0.307896	Amino Acid	Glutamate Metabolism
glutamate	0.00778442	0.879409	0.931915	Amino Acid	Glutamate Metabolism
cysteine-glutathione disulfide	0.104384	0.222709	0.477873	Amino Acid	Glutathione Metabolism
2-aminobutyrate	0.0219789	0.632726	0.794821	Amino Acid	Glutathione Metabolism
5-oxoproline	0.0138286	0.724781	0.851095	Amino Acid	Glutathione Metabolism
2-methylserine	0.13643	0.0283966	0.155862	Amino Acid	Glycine, Serine and Threonine Metabolism
N-acetylglycine	0.12706	0.0595777	0.232837	Amino Acid	Glycine, Serine and Threonine Metabolism
serine	0.0521774	0.236753	0.493446	Amino Acid	Glycine, Serine and Threonine Metabolism
threonine	0.0358455	0.421178	0.662626	Amino Acid	Glycine, Serine and Threonine Metabolism
cis-urocanate	0.136052	0.115599	0.331172	Amino Acid	Histidine Metabolism
trans-urocanate	0.0986453	0.163085	0.39537	Amino Acid	Histidine Metabolism
histidine	0.0095525	0.760683	0.866185	Amino Acid	Histidine Metabolism
N,N,N-trimethyl-5-aminovalerate	0.0590355	0.393008	0.640665	Amino Acid	Lysine Metabolism
N-acetyl-cadaverine	0.0472627	0.603056	0.786741	Amino Acid	Lysine Metabolism
5-hydroxylysine	0.0167857	0.746092	0.859862	Amino Acid	Lysine Metabolism
lysine	0.0131704	0.714374	0.843034	Amino Acid	Lysine Metabolism
methionine sulfone	0.163965	0.0179144	0.12413	Amino Acid	Methionine, Cysteine, SAM and Taurine Metabolism
S-methylcysteine	0.127467	0.0335365	0.171966	Amino Acid	Methionine, Cysteine, SAM and Taurine Metabolism
S-methylcysteine sulfoxide	0.119909	0.117737	0.332454	Amino Acid	Methionine, Cysteine, SAM and Taurine Metabolism
taurine	0.117229	0.0372141	0.179139	Amino Acid	Methionine, Cysteine, SAM and Taurine Metabolism
S-methylmethionine	0.056657	0.365915	0.614416	Amino Acid	Methionine, Cysteine, SAM and Taurine Metabolism
hypotaurine	0.0447908	0.51775	0.72806	Amino Acid	Methionine, Cysteine, SAM and Taurine Metabolism
3-sulfo-L-alanine	0.00794311	0.898311	0.93766	Amino Acid	Methionine, Cysteine, SAM and Taurine Metabolism
phenol sulfate	0.0897888	0.343285	0.595849	Amino Acid	Tyrosine Metabolism
gentisate	0.0801823	0.302758	0.574598	Amino Acid	Tyrosine Metabolism
phenol glucuronide	0.0778204	0.266313	0.534267	Amino Acid	Tyrosine Metabolism
thyroxine	0.0681659	0.238641	0.495016	Amino Acid	Tyrosine Metabolism
5-hydroxymethyl-2-furoic acid	0.0402256	0.557	0.752825	Amino Acid	Tyrosine Metabolism
4-hydroxyphenylacetatoylcarnitine	0.0262847	0.806396	0.891232	Amino Acid	Tyrosine Metabolism
tyramine O-sulfate	0.0161526	0.87206	0.927097	Amino Acid	Tyrosine Metabolism
citrulline	0.0471632	0.321465	0.587807	Amino Acid	Urea cycle; Arginine and Proline Metabolism
proline	0.0319086	0.502931	0.717319	Amino Acid	Urea cycle; Arginine and Proline Metabolism
hydroxyproline	0.0267547	0.553988	0.750725	Amino Acid	Urea cycle; Arginine and Proline Metabolism
ornithine	0.0215657	0.613542	0.787463	Amino Acid	Urea cycle; Arginine and Proline Metabolism
arginine	0.0201815	0.677564	0.816996	Amino Acid	Urea cycle; Arginine and Proline Metabolism
prolylhydroxyproline	-4.77569e-05	0.99937	0.99937	Amino Acid	Urea cycle; Arginine and Proline Metabolism
fructose	0.0270422	0.583262	0.772151	Carbohydrate	Fructose, Mannose and Galactose Metabolism
maltotriose	0.0226538	0.73328	0.853041	Carbohydrate	Glycogen Metabolism
maltose	0.0142391	0.845692	0.911213	Carbohydrate	Glycogen Metabolism
lactate	0.0414492	0.32705	0.589708	Carbohydrate	Glycolysis, Gluconeogenesis, and Pyruvate Metabolism
pyruvate	0.0391401	0.378612	0.622734	Carbohydrate	Glycolysis, Gluconeogenesis, and Pyruvate Metabolism
glucose	0.0304548	0.37089	0.616258	Carbohydrate	Glycolysis, Gluconeogenesis, and Pyruvate Metabolism
2,3-diphosphoglycerate	0.026052	0.104688	0.317639	Carbohydrate	Glycolysis, Gluconeogenesis, and Pyruvate Metabolism
3-phosphoglycerate	0.0161869	0.803222	0.890746	Carbohydrate	Glycolysis, Gluconeogenesis, and Pyruvate Metabolism
glycerate	0.000129892	0.997533	0.998751	Carbohydrate	Glycolysis, Gluconeogenesis, and Pyruvate Metabolism
oxalate (ethanedioate)	0.0541185	0.306787	0.578353	Cofactors and Vitamins	Ascorbate and Aldarate Metabolism
threonate	0.00884008	0.876833	0.931158	Cofactors and Vitamins	Ascorbate and Aldarate Metabolism
bilirubin (E,E)*	0.0836169	0.173051	0.412368	Cofactors and Vitamins	Hemoglobin and Porphyrin Metabolism
gamma-tocopherol/beta-tocopherol	0.0696514	0.224427	0.479792	Cofactors and Vitamins	Tocopherol Metabolism
alpha-tocopherol	0.0511878	0.237254	0.493446	Cofactors and Vitamins	Tocopherol Metabolism
beta-cryptoxanthin	0.110497	0.175241	0.415229	Cofactors and Vitamins	Vitamin A Metabolism
carotene diol (3)	0.0829211	0.331124	0.591423	Cofactors and Vitamins	Vitamin A Metabolism
carotene diol (2)	0.0643729	0.406422	0.649015	Cofactors and Vitamins	Vitamin A Metabolism
carotene diol (1)	0.0421477	0.604519	0.786741	Cofactors and Vitamins	Vitamin A Metabolism
citrate	0.035699	0.444393	0.680499	Energy	TCA Cycle
alpha-ketoglutarate	0.0339215	0.516582	0.72806	Energy	TCA Cycle
androstenediol (3beta,17beta) monosulfate (2)	0.194948	0.0244772	0.144935	Lipid	Androgenic Steroids
androstenediol (3alpha, 17alpha) monosulfate (2)	0.091402	0.237379	0.493446	Lipid	Androgenic Steroids
16a-hydroxy DHEA 3-sulfate	0.0608286	0.478308	0.703775	Lipid	Androgenic Steroids
androsterone sulfate	0.0443514	0.679018	0.816996	Lipid	Androgenic Steroids
andro steroid monosulfate C19H28O6S (1)*	0.0196341	0.819116	0.899735	Lipid	Androgenic Steroids
dehydroisoandrosterone sulfate (DHEA-S)	0.0100203	0.91239	0.94629	Lipid	Androgenic Steroids
propionylglycine (C3)	0.0964666	0.12761	0.34632	Lipid	BCAA Metabolism
N-stearoyl-sphingadienine (d18:2/18:0)*	0.104307	0.0702411	0.257969	Lipid	Ceramide
N-behenoyl-sphingadienine (d18:2/22:0)*	0.103056	0.0554667	0.223008	Lipid	Ceramide
ceramide (d18:1/20:0, d16:1/22:0, d20:1/18:0)*	0.063719	0.188495	0.431288	Lipid	Ceramide
N-stearoyl-sphingosine (d18:1/18:0)*	0.041196	0.426904	0.670173	Lipid	Ceramide
N-palmitoyl-sphingosine (d18:1/16:0)	0.0405201	0.366309	0.614416	Lipid	Ceramide
ceramide (d18:2/24:1, d18:1/24:2)*	0.0309197	0.496268	0.71302	Lipid	Ceramide
ceramide (d16:1/24:1, d18:1/22:1)*	0.0222075	0.643869	0.7983	Lipid	Ceramide
cortisone	0.0658764	0.294737	0.566847	Lipid	Corticosteroids
palmitoleoyl-arachidonoyl-glycerol (16:1/20:4) [2]*	0.167518	0.0224481	0.139015	Lipid	Diacylglycerol
linoleoyl-arachidonoyl-glycerol (18:2/20:4) [2]*	0.138499	0.0303367	0.161962	Lipid	Diacylglycerol
oleoyl-arachidonoyl-glycerol (18:1/20:4) [2]*	0.128974	0.0437306	0.19872	Lipid	Diacylglycerol
stearoyl-arachidonoyl-glycerol (18:0/20:4) [1]*	0.116504	0.0434417	0.19833	Lipid	Diacylglycerol
oleoyl-arachidonoyl-glycerol (18:1/20:4) [1]*	0.115109	0.0688949	0.255788	Lipid	Diacylglycerol
linoleoyl-arachidonoyl-glycerol (18:2/20:4) [1]*	0.0929702	0.157179	0.384757	Lipid	Diacylglycerol
stearoyl-arachidonoyl-glycerol (18:0/20:4) [2]*	0.0862498	0.130303	0.348783	Lipid	Diacylglycerol
palmitoyl-arachidonoyl-glycerol (16:0/20:4) [2]*	0.0776224	0.246626	0.505926	Lipid	Diacylglycerol
linoleoyl-linolenoyl-glycerol (18:2/18:3) [2]*	0.055278	0.377381	0.621755	Lipid	Diacylglycerol
diacylglycerol (16:1/18:2 [2], 16:0/18:3 [1])*	0.0545453	0.372958	0.618641	Lipid	Diacylglycerol
oleoyl-linolenoyl-glycerol (18:1/18:3) [2]*	0.0499823	0.43193	0.670173	Lipid	Diacylglycerol
oleoyl-oleoyl-glycerol (18:1/18:1) [2]*	0.0464411	0.43382	0.670173	Lipid	Diacylglycerol
diacylglycerol (14:0/18:1, 16:0/16:1) [2]*	0.0464309	0.520149	0.72806	Lipid	Diacylglycerol
diacylglycerol (14:0/18:1, 16:0/16:1) [1]*	0.0454086	0.531835	0.739122	Lipid	Diacylglycerol
oleoyl-linoleoyl-glycerol (18:1/18:2) [2]	0.0446255	0.429443	0.670173	Lipid	Diacylglycerol
palmitoyl-oleoyl-glycerol (16:0/18:1) [2]*	0.0413488	0.499501	0.714513	Lipid	Diacylglycerol
oleoyl-oleoyl-glycerol (18:1/18:1) [1]*	0.0382881	0.509463	0.722417	Lipid	Diacylglycerol
palmitoleoyl-linoleoyl-glycerol (16:1/18:2) [1]*	0.029615	0.633781	0.794821	Lipid	Diacylglycerol
palmitoyl-linoleoyl-glycerol (16:0/18:2) [2]*	0.0286792	0.614978	0.787463	Lipid	Diacylglycerol
palmitoyl-arachidonoyl-glycerol (16:0/20:4) [1]*	0.0248617	0.729928	0.853041	Lipid	Diacylglycerol
oleoyl-linoleoyl-glycerol (18:1/18:2) [1]	0.0242579	0.667124	0.809665	Lipid	Diacylglycerol
palmitoyl-oleoyl-glycerol (16:0/18:1) [1]*	0.0242168	0.694782	0.83228	Lipid	Diacylglycerol
linoleoyl-linoleoyl-glycerol (18:2/18:2) [1]*	0.015172	0.813363	0.896903	Lipid	Diacylglycerol
palmitoyl-palmitoyl-glycerol (16:0/16:0) [2]*	0.0124747	0.86734	0.924921	Lipid	Diacylglycerol
N-stearoyl-sphinganine (d18:0/18:0)*	0.106877	0.0707633	0.257969	Lipid	Dihydroceramide
N-palmitoyl-sphinganine (d18:0/16:0)	0.0709412	0.137209	0.357908	Lipid	Dihydroceramide
sphingomyelin (d18:0/20:0, d16:0/22:0)*	0.130826	0.0405095	0.188698	Lipid	Dihydrosphingomyelins
sphingomyelin (d18:0/18:0, d19:0/17:0)*	0.124972	0.0482153	0.205705	Lipid	Dihydrosphingomyelins
behenoyl dihydrosphingomyelin (d18:0/22:0)*	0.11647	0.0776601	0.271949	Lipid	Dihydrosphingomyelins
myristoyl dihydrosphingomyelin (d18:0/14:0)*	0.0935596	0.088105	0.29294	Lipid	Dihydrosphingomyelins
palmitoyl dihydrosphingomyelin (d18:0/16:0)*	0.0757164	0.106938	0.318851	Lipid	Dihydrosphingomyelins
linoleoyl ethanolamide	0.0882425	0.15251	0.378398	Lipid	Endocannabinoid
arachidonoyl ethanolamide	0.0741789	0.150234	0.378297	Lipid	Endocannabinoid
N-oleoyltaurine	0.0389853	0.539843	0.743903	Lipid	Endocannabinoid
hexanoylglycine (C6)	0.0935295	0.235358	0.493444	Lipid	Fatty Acid Metabolism(Acyl Glycine)
N-palmitoylglycine	0.0779481	0.0958223	0.300668	Lipid	Fatty Acid Metabolism(Acyl Glycine)
trans-2-hexenoylglycine	0.0672174	0.400934	0.64604	Lipid	Fatty Acid Metabolism(Acyl Glycine)
stearamide (18:0)	0.00931916	0.898006	0.93766	Lipid	Fatty Acid, Amide
2-aminooctanoate	0.0710601	0.309978	0.578353	Lipid	Fatty Acid, Amino
2-aminoheptanoate	0.0322787	0.63101	0.794821	Lipid	Fatty Acid, Amino
15-methylpalmitate (i17:0)	0.133402	0.0255936	0.147088	Lipid	Fatty Acid, Branched
17-methylstearate (i19:0)	0.0738535	0.172439	0.412368	Lipid	Fatty Acid, Branched
2-hydroxyphytanate*	-0.000426387	0.995998	0.998751	Lipid	Fatty Acid, Branched
dodecanedioate (C12)	0.0464783	0.511074	0.722603	Lipid	Fatty Acid, Dicarboxylate
4-hydroxy-2-oxoglutaric acid	0.0368432	0.609386	0.786741	Lipid	Fatty Acid, Dicarboxylate
eicosanodioate (C20-DC)	0.0345322	0.543652	0.745347	Lipid	Fatty Acid, Dicarboxylate
adipate	0.032559	0.632828	0.794821	Lipid	Fatty Acid, Dicarboxylate
dodecadienoate (12:2)*	0.0178946	0.75367	0.864244	Lipid	Fatty Acid, Dicarboxylate
docosadioate (C22-DC)	0.0127511	0.828091	0.904244	Lipid	Fatty Acid, Dicarboxylate
12,13-DiHOME	0.0133422	0.862238	0.92459	Lipid	Fatty Acid, Dihydroxy
13-HODE + 9-HODE	0.0688246	0.256006	0.519996	Lipid	Fatty Acid, Monohydroxy
3-hydroxylaurate	0.0646879	0.314601	0.579935	Lipid	Fatty Acid, Monohydroxy
16-hydroxypalmitate	0.0465845	0.384309	0.631041	Lipid	Fatty Acid, Monohydroxy
3-hydroxydecanoate	0.0411463	0.54081	0.744186	Lipid	Fatty Acid, Monohydroxy
3-hydroxyoleate*	0.0342281	0.621442	0.793659	Lipid	Fatty Acid, Monohydroxy
2-hydroxyarachidate*	0.0220176	0.696243	0.83228	Lipid	Fatty Acid, Monohydroxy
3-hydroxymyristate	0.0183869	0.73697	0.855131	Lipid	Fatty Acid, Monohydroxy
3-hydroxystearate	0.0114424	0.833903	0.904244	Lipid	Fatty Acid, Monohydroxy
3-hydroxyoctanoate	0.000826004	0.990556	0.996677	Lipid	Fatty Acid, Monohydroxy
glycerol 3-phosphate	0.123057	0.149607	0.378297	Lipid	Glycerolipid Metabolism
glycosyl-N-stearoyl-sphingosine (d18:1/18:0)	0.118782	0.0193119	0.128005	Lipid	Hexosylceramide
glycosyl ceramide (d18:1/20:0, d16:1/22:0)*	0.0529282	0.366637	0.614416	Lipid	Hexosylceramide
glycosyl-N-behenoyl-sphingadienine (d18:2/22:0)*	0.0499225	0.4079	0.650111	Lipid	Hexosylceramide
glycosyl ceramide (d18:1/23:1, d17:1/24:1)*	0.0359847	0.584387	0.772593	Lipid	Hexosylceramide
glycosyl-N-(2-hydroxynervonoyl)-sphingosine (d18:1/24:1(2OH))*	0.025091	0.678499	0.816996	Lipid	Hexosylceramide
glycosyl-N-palmitoyl-sphingosine (d18:1/16:0)	0.0151898	0.743514	0.858841	Lipid	Hexosylceramide
glycosyl ceramide (d18:2/24:1, d18:1/24:2)*	0.000156486	0.997729	0.998751	Lipid	Hexosylceramide
3-hydroxybutyrate (BHBA)	0.0235091	0.826231	0.90395	Lipid	Ketone Bodies
lactosyl-N-behenoyl-sphingosine (d18:1/22:0)*	0.107787	0.0782209	0.271964	Lipid	Lactosylceramide
lactosyl-N-nervonoyl-sphingosine (d18:1/24:1)*	0.0146792	0.778565	0.878358	Lipid	Lactosylceramide
myristoleate (14:1n5)	0.151382	0.0226716	0.139015	Lipid	Long Chain Fatty Acid
myristate (14:0)	0.140067	0.025016	0.145829	Lipid	Long Chain Fatty Acid
10-heptadecenoate (17:1n7)	0.137919	0.0334982	0.171966	Lipid	Long Chain Fatty Acid
margarate (17:0)	0.118814	0.0319091	0.166712	Lipid	Long Chain Fatty Acid
10-nonadecenoate (19:1n9)	0.117289	0.0611479	0.233365	Lipid	Long Chain Fatty Acid
palmitoleate (16:1n7)	0.111996	0.0947167	0.300449	Lipid	Long Chain Fatty Acid
oleate/vaccenate (18:1)	0.102614	0.0706147	0.257969	Lipid	Long Chain Fatty Acid
palmitate (16:0)	0.0878206	0.107539	0.318851	Lipid	Long Chain Fatty Acid
nonadecanoate (19:0)	0.0715767	0.122119	0.336733	Lipid	Long Chain Fatty Acid
arachidate (20:0)	0.0465546	0.323914	0.588484	Lipid	Long Chain Fatty Acid
stearate (18:0)	0.0450968	0.325837	0.589523	Lipid	Long Chain Fatty Acid
eicosenoate (20:1n9 or 1n11)	0.0408387	0.506718	0.719569	Lipid	Long Chain Fatty Acid
erucate (22:1n9)	0.0151642	0.78993	0.884034	Lipid	Long Chain Fatty Acid
margaroylcarnitine (C17)*	0.139377	0.0297305	0.161254	Lipid	Long-chain Acylcarnitine
stearoylcarnitine (C18)	0.0798863	0.161913	0.393506	Lipid	Long-chain Acylcarnitine
linoleoylcarnitine (C18:2)*	0.031343	0.561603	0.754727	Lipid	Long-chain Acylcarnitine
3-hydroxyoleoylcarnitine (C18:1-OH)	0.00599834	0.928102	0.95953	Lipid	Long-chain Acylcarnitine
linolenoylcarnitine (C18:3)*	0.0563511	0.348015	0.599697	Lipid	Long-chain Acylcarnitine
oleoylcarnitine (C18)	0.0354781	0.527254	0.736948	Lipid	Long-chain Acylcarnitine
eicosenoylcarnitine (C20:1)*	0.081364	0.191394	0.435879	Lipid	Long-chain Acylcarnitine
arachidoylcarnitine (C20)*	0.0183176	0.765678	0.868836	Lipid	Long-chain Acylcarnitine
dihomo-linolenoylcarnitine (C20:3n3 or 6)*	0.0603957	0.336174	0.591951	Lipid	Long-chain Acylcarnitine
dihomo-linoleoylcarnitine (C20:2)*	0.0512773	0.392484	0.640665	Lipid	Long-chain Acylcarnitine
behenoylcarnitine (C22)*	0.0419635	0.485903	0.70775	Lipid	Long-chain Acylcarnitine
lignoceroylcarnitine (C24)*	0.0623297	0.22304	0.477873	Lipid	Long-chain Acylcarnitine
1-lignoceroyl-GPC (24:0)	0.140538	0.0668758	0.251191	Lipid	Lysophosphatidylcholine
1-arachidonoyl-GPC* (20:4)*	0.129597	0.0301399	0.161795	Lipid	Lysophosphatidylcholine
2-palmitoyl-GPC* (16:0)*	0.120845	0.0281058	0.155807	Lipid	Lysophosphatidylcholine
1-stearoyl-GPC (18:0)	0.105319	0.0317251	0.166642	Lipid	Lysophosphatidylcholine
1-linoleoyl-GPC (18:2)	0.0990462	0.0218016	0.137421	Lipid	Lysophosphatidylcholine
1-palmitoyl-GPA (16:0)	0.16015	0.0151456	0.111258	Lipid	Lysophospholipid
2-stearoyl-GPE (18:0)*	0.115415	0.0371399	0.179139	Lipid	Lysophospholipid
1-oleoyl-GPE (18:1)	0.106134	0.0433825	0.19833	Lipid	Lysophospholipid
1-linoleoyl-GPI* (18:2)*	0.037242	0.482655	0.706978	Lipid	Lysophospholipid
1-arachidonoyl-GPI* (20:4)*	0.0202011	0.658515	0.80522	Lipid	Lysophospholipid
1-palmitoyl-GPI* (16:0)	0.00811322	0.884138	0.932904	Lipid	Lysophospholipid
1-oleoyl-GPI (18:1)*	0.00743031	0.888188	0.934744	Lipid	Lysophospholipid
1-stearoyl-GPI (18:0)	0.00285483	0.956564	0.97249	Lipid	Lysophospholipid
1-(1-enyl-palmitoyl)-GPC (P-16:0)*	0.135215	0.0455837	0.201517	Lipid	Lysoplasmalogen
1-(1-enyl-stearoyl)-GPE (P-18:0)*	0.13099	0.0372212	0.179139	Lipid	Lysoplasmalogen
1-(1-enyl-oleoyl)-GPE (P-18:1)*	0.12205	0.0611158	0.233365	Lipid	Lysoplasmalogen
1-(1-enyl-palmitoyl)-GPE (P-16:0)*	0.116506	0.0543535	0.219436	Lipid	Lysoplasmalogen
laurate (12:0)	0.156506	0.01695	0.120001	Lipid	Medium Chain Fatty Acid
5-dodecenoate (12:1n7)	0.0542815	0.43236	0.670173	Lipid	Medium Chain Fatty Acid
caprate (10:0)	0.0500727	0.639436	0.794821	Lipid	Medium Chain Fatty Acid
caprylate (8:0)	0.0280254	0.831374	0.904244	Lipid	Medium Chain Fatty Acid
caproate (6:0)	0.00466895	0.932144	0.960696	Lipid	Medium Chain Fatty Acid
palmitoylcarnitine (C16)	0.0571308	0.309185	0.578353	Lipid	Medium-chain Acylcarnitine
palmitoleoylcarnitine (C16:1)*	0.0346513	0.547047	0.74836	Lipid	Medium-chain Acylcarnitine
myristoylcarnitine (C14)	0.0181227	0.759868	0.866185	Lipid	Medium-chain Acylcarnitine
1-linolenoylglycerol (18:3)	0.0932584	0.198792	0.448545	Lipid	Monoacylglycerol
1-linoleoylglycerol (18:2)	0.0814081	0.270668	0.540593	Lipid	Monoacylglycerol
2-linoleoylglycerol (18:2)	0.0764054	0.297379	0.567599	Lipid	Monoacylglycerol
1-oleoylglycerol (18:1)	0.0699322	0.367929	0.615254	Lipid	Monoacylglycerol
1-dihomo-linolenylglycerol (20:3)	0.0677822	0.338423	0.593608	Lipid	Monoacylglycerol
1-docosahexaenoylglycerol (22:6)	0.0359102	0.628906	0.794821	Lipid	Monoacylglycerol
1-dihomo-linoleoylglycerol (20:2)	0.0358625	0.566054	0.758621	Lipid	Monoacylglycerol
1-palmitoleoylglycerol (16:1)*	0.0241592	0.74867	0.861241	Lipid	Monoacylglycerol
1-palmitoylglycerol (16:0)	0.0138382	0.851714	0.916437	Lipid	Monoacylglycerol
1-linoleoyl-2-linolenoyl-GPC (18:2/18:3)*	0.0847705	0.271126	0.540593	Lipid	Phosphatidylcholine
1,2-dilinoleoyl-GPC (18:2/18:2)	0.0818176	0.135559	0.357908	Lipid	Phosphatidylcholine
1-palmitoyl-2-arachidonoyl-GPC (16:0/20:4n6)	0.0730705	0.0810378	0.275867	Lipid	Phosphatidylcholine
1-stearoyl-2-arachidonoyl-GPC (18:0/20:4)	0.0654548	0.119152	0.334515	Lipid	Phosphatidylcholine
1-myristoyl-2-palmitoyl-GPC (14:0/16:0)	0.0581337	0.32907	0.58991	Lipid	Phosphatidylcholine
1-palmitoyl-2-oleoyl-GPC (16:0/18:1)	0.0392571	0.247287	0.505926	Lipid	Phosphatidylcholine
1-palmitoyl-2-linoleoyl-GPC (16:0/18:2)	0.0324747	0.306571	0.578353	Lipid	Phosphatidylcholine
1-palmitoyl-2-palmitoleoyl-GPC (16:0/16:1)*	0.0311052	0.550252	0.749785	Lipid	Phosphatidylcholine
1-palmitoyl-2-docosahexaenoyl-GPC (16:0/22:6)	0.0263667	0.572707	0.765437	Lipid	Phosphatidylcholine
1-stearoyl-2-oleoyl-GPC (18:0/18:1)	0.0238533	0.60406	0.786741	Lipid	Phosphatidylcholine
1-stearoyl-2-linoleoyl-GPC (18:0/18:2)*	0.0107441	0.738446	0.855826	Lipid	Phosphatidylcholine
1-palmitoyl-2-stearoyl-GPC (16:0/18:0)	0.00756866	0.844469	0.911213	Lipid	Phosphatidylcholine
1-stearoyl-2-docosahexaenoyl-GPC (18:0/22:6)	0.00220779	0.966099	0.97945	Lipid	Phosphatidylcholine
1-stearoyl-2-arachidonoyl-GPE (18:0/20:4)	0.0598846	0.288844	0.558814	Lipid	Phosphatidylethanolamine
1-oleoyl-2-arachidonoyl-GPE (18:1/20:4)*	0.0464039	0.434963	0.670173	Lipid	Phosphatidylethanolamine
1-stearoyl-2-docosahexaenoyl-GPE (18:0/22:6)*	0.0427412	0.455415	0.683473	Lipid	Phosphatidylethanolamine
1-palmitoyl-2-docosahexaenoyl-GPE (16:0/22:6)*	0.0314479	0.611094	0.786741	Lipid	Phosphatidylethanolamine
1-oleoyl-2-docosahexaenoyl-GPE (18:1/22:6)*	0.0267876	0.718094	0.844423	Lipid	Phosphatidylethanolamine
1-stearoyl-2-linoleoyl-GPE (18:0/18:2)*	0.0256949	0.666523	0.809665	Lipid	Phosphatidylethanolamine
1-palmitoyl-2-arachidonoyl-GPE (16:0/20:4)*	0.0147843	0.796959	0.887832	Lipid	Phosphatidylethanolamine
1-stearoyl-2-oleoyl-GPE (18:0/18:1)	0.00688131	0.921063	0.953261	Lipid	Phosphatidylethanolamine
1-stearoyl-2-oleoyl-GPI (18:0/18:1)*	0.0707565	0.268212	0.536973	Lipid	Phosphatidylinositol (PI)
1-palmitoyl-2-linoleoyl-GPI (16:0/18:2)	0.0658827	0.266117	0.534267	Lipid	Phosphatidylinositol (PI)
1-palmitoyl-2-oleoyl-GPI (16:0/18:1)*	0.0640503	0.285776	0.555075	Lipid	Phosphatidylinositol (PI)
1-stearoyl-2-arachidonoyl-GPI (18:0/20:4)	0.0638479	0.159233	0.387957	Lipid	Phosphatidylinositol (PI)
1-palmitoyl-2-arachidonoyl-GPI (16:0/20:4)*	0.0630808	0.208974	0.461917	Lipid	Phosphatidylinositol (PI)
1-stearoyl-2-linoleoyl-GPI (18:0/18:2)	0.0627578	0.231048	0.488602	Lipid	Phosphatidylinositol (PI)
1-stearoyl-2-oleoyl-GPS (18:0/18:1)	0.0295591	0.68961	0.827701	Lipid	Phosphatidylserine
glycerophosphoethanolamine	0.0810477	0.0862948	0.290724	Lipid	Phospholipid Metabolism
phosphoethanolamine (PE)	0.0547784	0.340086	0.595455	Lipid	Phospholipid Metabolism
glycerophosphorylcholine (GPC)	0.0421211	0.434466	0.670173	Lipid	Phospholipid Metabolism
1-(1-enyl-palmitoyl)-2-oleoyl-GPE (P-16:0/18:1)*	0.124672	0.0357004	0.179139	Lipid	Plasmalogen
1-(1-enyl-stearoyl)-2-oleoyl-GPE (P-18:0/18:1)	0.121785	0.0194255	0.128005	Lipid	Plasmalogen
1-(1-enyl-palmitoyl)-2-linoleoyl-GPE (P-16:0/18:2)*	0.114079	0.098805	0.307428	Lipid	Plasmalogen
1-(1-enyl-stearoyl)-2-arachidonoyl-GPE (P-18:0/20:4)*	0.110253	0.0960169	0.300668	Lipid	Plasmalogen
1-(1-enyl-palmitoyl)-2-linoleoyl-GPC (P-16:0/18:2)*	0.0495234	0.431441	0.670173	Lipid	Plasmalogen
1-(1-enyl-palmitoyl)-2-arachidonoyl-GPE (P-16:0/20:4)*	0.0445738	0.445076	0.680499	Lipid	Plasmalogen
1-(1-enyl-palmitoyl)-2-oleoyl-GPC (P-16:0/18:1)*	0.0411877	0.429693	0.670173	Lipid	Plasmalogen
linoleate (18:2n6)	0.126347	0.0345944	0.175296	Lipid	Polyunsaturated Fatty Acid (n3 and n6)
hexadecadienoate (16:2n6)	0.100011	0.136066	0.357908	Lipid	Polyunsaturated Fatty Acid (n3 and n6)
dihomolinolenate (20:3n3 or 3n6)	0.0757201	0.175527	0.415229	Lipid	Polyunsaturated Fatty Acid (n3 and n6)
arachidonate (20:4n6)	0.0667157	0.263149	0.530096	Lipid	Polyunsaturated Fatty Acid (n3 and n6)
docosapentaenoate (DPA; 22:5n3)	0.0591508	0.354516	0.606589	Lipid	Polyunsaturated Fatty Acid (n3 and n6)
dihomolinoleate (20:2n6)	0.0549671	0.343948	0.595849	Lipid	Polyunsaturated Fatty Acid (n3 and n6)
adrenate (22:4n6)	0.0387787	0.536681	0.741697	Lipid	Polyunsaturated Fatty Acid (n3 and n6)
stearidonate (18:4n3)	0.0345496	0.698387	0.83228	Lipid	Polyunsaturated Fatty Acid (n3 and n6)
docosatrienoate (22:3n3)	0.0246931	0.700023	0.83228	Lipid	Polyunsaturated Fatty Acid (n3 and n6)
docosapentaenoate (n6 DPA; 22:5n6)	0.0196638	0.73052	0.853041	Lipid	Polyunsaturated Fatty Acid (n3 and n6)
docosatrienoate (22:3n6)*	0.002126	0.976345	0.986441	Lipid	Polyunsaturated Fatty Acid (n3 and n6)
docosahexaenoate (DHA; 22:6n3)	0.00212529	0.97334	0.984424	Lipid	Polyunsaturated Fatty Acid (n3 and n6)
17alpha-hydroxypregnenolone 3-sulfate	0.0722146	0.17731	0.418434	Lipid	Pregnenolone Steroids
chenodeoxycholate	0.128543	0.157526	0.384757	Lipid	Primary Bile Acid Metabolism
cholate	0.100911	0.336254	0.591951	Lipid	Primary Bile Acid Metabolism
5alpha-pregnan-3beta,20alpha-diol monosulfate (2)	0.162404	0.0604209	0.233306	Lipid	Progestin Steroids
pregnanolone/allopregnanolone sulfate	0.133291	0.0444333	0.199907	Lipid	Progestin Steroids
5alpha-pregnan-3beta,20beta-diol monosulfate (1)	0.109888	0.211883	0.464325	Lipid	Progestin Steroids
pregnanediol-3-glucuronide	0.0151994	0.864032	0.92459	Lipid	Progestin Steroids
ursodeoxycholate	0.13822	0.164926	0.397253	Lipid	Secondary Bile Acid Metabolism
hyocholate	0.134922	0.151918	0.378398	Lipid	Secondary Bile Acid Metabolism
7-ketodeoxycholate	0.084386	0.391821	0.640665	Lipid	Secondary Bile Acid Metabolism
isoursodeoxycholate	0.0789542	0.460113	0.688408	Lipid	Secondary Bile Acid Metabolism
3b-hydroxy-5-cholenoic acid	0.0189794	0.793976	0.887546	Lipid	Secondary Bile Acid Metabolism
sphingadienine	0.113841	0.121168	0.336525	Lipid	Sphingolipid Synthesis
sphinganine-1-phosphate	0.0692697	0.215813	0.469597	Lipid	Sphingolipid Synthesis
sphinganine	0.052335	0.396927	0.643114	Lipid	Sphingolipid Synthesis
tricosanoyl sphingomyelin (d18:1/23:0)*	0.130606	0.0250759	0.145829	Lipid	Sphingomyelins
sphingomyelin (d18:1/20:1, d18:2/20:0)*	0.115957	0.0376243	0.180191	Lipid	Sphingomyelins
sphingomyelin (d18:1/25:0, d19:0/24:1, d20:1/23:0, d19:1/24:0)*	0.106452	0.0789337	0.273469	Lipid	Sphingomyelins
sphingomyelin (d18:2/16:0, d18:1/16:1)*	0.101149	0.0268474	0.151618	Lipid	Sphingomyelins
sphingomyelin (d18:1/20:0, d16:1/22:0)*	0.0981598	0.0590236	0.232837	Lipid	Sphingomyelins
stearoyl sphingomyelin (d18:1/18:0)	0.0929884	0.0747089	0.263792	Lipid	Sphingomyelins
behenoyl sphingomyelin (d18:1/22:0)*	0.091104	0.053996	0.218897	Lipid	Sphingomyelins
sphingomyelin (d18:1/22:1, d18:2/22:0, d16:1/24:1)*	0.0867583	0.0738892	0.263792	Lipid	Sphingomyelins
sphingomyelin (d18:1/20:2, d18:2/20:1, d16:1/22:2)*	0.0716827	0.208106	0.461042	Lipid	Sphingomyelins
palmitoyl sphingomyelin (d18:1/16:0)	0.0700952	0.0487991	0.206505	Lipid	Sphingomyelins
lignoceroyl sphingomyelin (d18:1/24:0)	0.0677755	0.227704	0.483623	Lipid	Sphingomyelins
sphingomyelin (d18:1/22:2, d18:2/22:1, d16:1/24:2)*	0.056867	0.247526	0.505926	Lipid	Sphingomyelins
sphingomyelin (d18:2/24:2)*	0.0420388	0.454062	0.683063	Lipid	Sphingomyelins
sphingomyelin (d18:2/24:1, d18:1/24:2)*	0.0366093	0.401378	0.64604	Lipid	Sphingomyelins
sphingomyelin (d18:1/24:1, d18:2/24:0)*	0.0289468	0.469944	0.696716	Lipid	Sphingomyelins
sphingosine 1-phosphate	0.0705671	0.141753	0.365417	Lipid	Sphingosines
sphingosine	0.0368981	0.603163	0.786741	Lipid	Sphingosines
cholesterol	0.0713182	0.0997501	0.307896	Lipid	Sterol
campesterol	0.0475885	0.498074	0.713517	Lipid	Sterol
beta-sitosterol	0.0219155	0.795089	0.887774	Lipid	Sterol
AMP	0.0357965	0.557877	0.752825	Nucleotide	Purine Metabolism
ADP	0.0284382	0.71585	0.84365	Nucleotide	Purine Metabolism
uridine	0.0667045	0.152599	0.378398	Nucleotide	Pyrimidine Metabolism
beta-alanine	0.0211649	0.66611	0.809665	Nucleotide	Pyrimidine Metabolism
5-methyluridine (ribothymidine)	0.0194177	0.676556	0.816996	Nucleotide	Pyrimidine Metabolism
CMP	0.0161379	0.820536	0.899735	Nucleotide	Pyrimidine Metabolism
3-aminoisobutyrate	0.0121297	0.858994	0.922238	Nucleotide	Pyrimidine Metabolism
glucuronide of C19H28O4 (1)*	0.0173483	0.560976	0.754727	Partially Characterized Molecules	Partially Characterized Molecules
glycylvaline	0.0745543	0.13472	0.356699	Peptide	Dipeptide
DSGEGDFXAEGGGVR*	0.0462731	0.504079	0.717909	Peptide	Fibrinogen Cleavage Peptide
ADpSGEGDFXAEGGGVR*	0.0143982	0.802705	0.890746	Peptide	Fibrinogen Cleavage Peptide
gamma-glutamylcitrulline*	0.122653	0.0682662	0.254565	Peptide	Gamma-glutamyl Amino Acid
gamma-glutamylglutamine	0.11568	0.0656432	0.248579	Peptide	Gamma-glutamyl Amino Acid
gamma-glutamyl-epsilon-lysine	0.0739981	0.152556	0.378398	Peptide	Gamma-glutamyl Amino Acid
gamma-glutamylglutamate	0.0588476	0.419262	0.661743	Peptide	Gamma-glutamyl Amino Acid
gamma-glutamylthreonine	0.0460067	0.3574	0.60939	Peptide	Gamma-glutamyl Amino Acid
gamma-glutamyl-2-aminobutyrate	0.0448314	0.492162	0.710899	Peptide	Gamma-glutamyl Amino Acid
gamma-glutamylmethionine	0.0204699	0.735363	0.85428	Peptide	Gamma-glutamyl Amino Acid
gamma-glutamyl-alpha-lysine	0.0128265	0.796831	0.887832	Peptide	Gamma-glutamyl Amino Acid
gamma-glutamyltryptophan	0.009621	0.856303	0.920361	Peptide	Gamma-glutamyl Amino Acid
HWESASXX*	0.104927	0.131293	0.349494	Peptide	Polypeptide
tartronate (hydroxymalonate)	0.108367	0.0519707	0.214242	Xenobiotics	Bacterial/Fungal
2-hydroxyhippurate (salicylurate)	0.175549	0.217254	0.471683	Xenobiotics	Benzoate Metabolism
3-phenylpropionate (hydrocinnamate)	0.0696431	0.449035	0.683063	Xenobiotics	Benzoate Metabolism
3-hydroxyhippurate	0.0442311	0.628351	0.794821	Xenobiotics	Benzoate Metabolism
benzoate	0.0250096	0.519582	0.72806	Xenobiotics	Benzoate Metabolism
3-(3-hydroxyphenyl)propionate	0.0214927	0.760417	0.866185	Xenobiotics	Benzoate Metabolism
4-hydroxychlorothalonil	0.128839	0.100767	0.30959	Xenobiotics	Chemical
perfluorooctanoate (PFOA)*	0.0770335	0.369656	0.615254	Xenobiotics	Chemical
diethanolamine	0.0249423	0.830007	0.904244	Xenobiotics	Chemical
iminodiacetate (IDA)	0.0247228	0.650666	0.802653	Xenobiotics	Chemical
diglycerol	0.0221109	0.78929	0.884034	Xenobiotics	Chemical
EDTA	0.0191533	0.537484	0.741697	Xenobiotics	Chemical
1,2,3-benzenetriol sulfate (2)	0.00533527	0.954472	0.97249	Xenobiotics	Chemical
4-acetamidophenol	0.0801919	0.277548	0.547039	Xenobiotics	Drug - Analgesics, Anesthetics
naproxen	0.0605333	0.471471	0.696865	Xenobiotics	Drug - Analgesics, Anesthetics
N-desmethyl tramadol	0.0563805	0.200077	0.450403	Xenobiotics	Drug - Analgesics, Anesthetics
desmethylnaproxen sulfate	0.0559224	0.373941	0.61871	Xenobiotics	Drug - Analgesics, Anesthetics
O-desmethyltramadol	0.0551795	0.200689	0.450744	Xenobiotics	Drug - Analgesics, Anesthetics
salicyluric glucuronide*	0.048552	0.630241	0.794821	Xenobiotics	Drug - Analgesics, Anesthetics
tramadol	0.0450864	0.335089	0.591951	Xenobiotics	Drug - Analgesics, Anesthetics
O-desmethyltramadol glucuronide	0.044561	0.454443	0.683063	Xenobiotics	Drug - Analgesics, Anesthetics
N-ethylglycinexylidide	0.0179305	0.865591	0.92459	Xenobiotics	Drug - Analgesics, Anesthetics
morphine	0.0142336	0.697521	0.83228	Xenobiotics	Drug - Analgesics, Anesthetics
fluconazole	0.118912	0.0235337	0.141058	Xenobiotics	Drug - Antibiotic
ofloxacin	0.109533	0.351099	0.602854	Xenobiotics	Drug - Antibiotic
clindamycin	0.0748675	0.0720409	0.260681	Xenobiotics	Drug - Antibiotic
cefazolin	0.068931	0.222339	0.477873	Xenobiotics	Drug - Antibiotic
doxycycline	0.0571059	0.277719	0.547039	Xenobiotics	Drug - Antibiotic
meropenem	0.025118	0.782007	0.879195	Xenobiotics	Drug - Antibiotic
ceftazidime	0.0111192	0.577884	0.767109	Xenobiotics	Drug - Antibiotic
mycophenolic acid glucuronide	0.0234645	0.185534	0.42651	Xenobiotics	Drug - Antiinflammatory, Immunosuppressant
mycophenolic acid	0.0175335	0.206905	0.459423	Xenobiotics	Drug - Antiinflammatory, Immunosuppressant
metoprolol	0.0829609	0.230139	0.487735	Xenobiotics	Drug - Cardiovascular
hydrochlorothiazide	0.0642643	0.432454	0.670173	Xenobiotics	Drug - Cardiovascular
metoprolol acid metabolite*	0.0561412	0.639022	0.794821	Xenobiotics	Drug - Cardiovascular
alpha-hydroxymetoprolol	0.0388513	0.534213	0.740321	Xenobiotics	Drug - Cardiovascular
verapamil	0.0201271	0.492178	0.710899	Xenobiotics	Drug - Cardiovascular
atenolol	0.0195432	0.148603	0.377104	Xenobiotics	Drug - Cardiovascular
pantoprazole	0.0459951	0.660628	0.805784	Xenobiotics	Drug - Gastrointestinal
ondansetron	0.0104706	0.885918	0.933703	Xenobiotics	Drug - Gastrointestinal
ranitidine	0.00761865	0.80507	0.890774	Xenobiotics	Drug - Gastrointestinal
metformin	0.285204	0.0606547	0.233306	Xenobiotics	Drug - Metabolic
atorvastatin lactone	0.0568843	0.333895	0.591951	Xenobiotics	Drug - Metabolic
o-hydroxyatorvastatin lactone	0.0546005	0.327146	0.589708	Xenobiotics	Drug - Metabolic
atorvastatin (lipitor)	0.0526802	0.348376	0.599697	Xenobiotics	Drug - Metabolic
p-hydroxyatorvastatin lactone	0.0357649	0.254384	0.517777	Xenobiotics	Drug - Metabolic
o-hydroxyatorvastatin	0.0286351	0.652766	0.802811	Xenobiotics	Drug - Metabolic
p-hydroxyatorvastatin	0.00150343	0.941354	0.964049	Xenobiotics	Drug - Metabolic
pyridostigmine	0.112388	0.0411731	0.189897	Xenobiotics	Drug - Neurological
carbamazepine glucuronide*	0.0589403	0.418564	0.661711	Xenobiotics	Drug - Neurological
carbamazepine 10,11-epoxide*	0.0338885	0.636749	0.794821	Xenobiotics	Drug - Neurological
escitalopram	0.129757	0.115249	0.331171	Xenobiotics	Drug - Psychoactive
fluoxetine	0.107439	0.0795515	0.274172	Xenobiotics	Drug - Psychoactive
trazadone	0.0737666	0.343414	0.595849	Xenobiotics	Drug - Psychoactive
paroxetine	0.0615009	0.0511658	0.213628	Xenobiotics	Drug - Psychoactive
cetirizine	0.0694282	0.329759	0.590064	Xenobiotics	Drug - Respiratory
salicylate	0.133312	0.275059	0.546205	Xenobiotics	Drug - Topical Agents
hydroquinone sulfate	0.0162594	0.843703	0.911213	Xenobiotics	Drug - Topical Agents
pyrraline	0.0686295	0.364842	0.614416	Xenobiotics	Food Component/Plant
equol sulfate	0.0295948	0.510491	0.722603	Xenobiotics	Food Component/Plant
dihydroferulic acid	0.0271876	0.699308	0.83228	Xenobiotics	Food Component/Plant
S-allylcysteine	0.0163281	0.743684	0.858841	Xenobiotics	Food Component/Plant
acesulfame	0.0150964	0.879453	0.931915	Xenobiotics	Food Component/Plant
cinnamoylglycine	0.0141445	0.894274	0.937188	Xenobiotics	Food Component/Plant
naringenin 7-glucuronide	0.00263275	0.93164	0.960696	Xenobiotics	Food Component/Plant
4-ethylphenol glucuronide	0.000272046	0.995958	0.998751	Xenobiotics	Food Component/Plant
phytanate	-0.000429527	0.995637	0.998751	Xenobiotics	Food Component/Plant
7-methylurate	0.118022	0.0907029	0.294732	Xenobiotics	Xanthine Metabolism
caffeine	0.0115869	0.908849	0.944363	Xenobiotics	Xanthine Metabolism
asparagine	-0.0225737	0.579164	0.767765	Amino Acid	Alanine and Aspartate Metabolism
hydroxyasparagine	-0.115568	0.0466938	0.201858	Amino Acid	Alanine and Aspartate Metabolism
methylsuccinate	-0.0171279	0.763661	0.867555	Amino Acid	BCAA Metabolism
3-methyl-2-oxobutyrate	-0.0240311	0.571418	0.764761	Amino Acid	BCAA Metabolism
isobutyrylglycine (C4)	-0.0503984	0.472271	0.696992	Amino Acid	BCAA Metabolism
valine	-0.0518905	0.136627	0.357908	Amino Acid	BCAA Metabolism
3-methylglutaconate	-0.0533674	0.454384	0.683063	Amino Acid	BCAA Metabolism
leucine	-0.0595589	0.117385	0.33242	Amino Acid	BCAA Metabolism
3-methyl-2-oxovalerate	-0.0655625	0.221352	0.477873	Amino Acid	BCAA Metabolism
isoleucine	-0.0728142	0.0451723	0.200606	Amino Acid	BCAA Metabolism
4-methyl-2-oxopentanoate	-0.0805247	0.131588	0.349494	Amino Acid	BCAA Metabolism
isovalerylglycine	-0.0810876	0.327813	0.589822	Amino Acid	BCAA Metabolism
N-acetylvaline	-0.102682	0.0311236	0.164366	Amino Acid	BCAA Metabolism
N-acetylisoleucine	-0.120204	0.0185779	0.126046	Amino Acid	BCAA Metabolism
alpha-hydroxyisocaproate	-0.124047	0.0212115	0.134569	Amino Acid	BCAA Metabolism
alpha-hydroxyisovalerate	-0.130324	0.029874	0.161254	Amino Acid	BCAA Metabolism
guanidinoacetate	-0.0584129	0.369289	0.615254	Amino Acid	Creatine Metabolism
N-acetylglutamate	-0.00539686	0.938554	0.962617	Amino Acid	Glutamate Metabolism
N-methyl-GABA	-0.0338814	0.622287	0.7937	Amino Acid	Glutamate Metabolism
citramalate	-0.0658038	0.287301	0.556931	Amino Acid	Glutamate Metabolism
4-hydroxyglutamate	-0.0687391	0.323054	0.588484	Amino Acid	Glutamate Metabolism
N-acetylglutamine	-0.0746422	0.226147	0.482027	Amino Acid	Glutamate Metabolism
carboxyethyl-GABA	-0.0855819	0.0881518	0.29294	Amino Acid	Glutamate Metabolism
S-1-pyrroline-5-carboxylate	-0.105407	0.0598449	0.232837	Amino Acid	Glutamate Metabolism
beta-citrylglutamate	-0.130493	0.0399895	0.187836	Amino Acid	Glutamate Metabolism
cys-gly, oxidized	-0.0149563	0.833844	0.904244	Amino Acid	Glutathione Metabolism
cysteinylglycine disulfide*	-0.0457429	0.336873	0.591951	Amino Acid	Glutathione Metabolism
2-hydroxybutyrate/2-hydroxyisobutyrate	-0.0866044	0.0817849	0.277444	Amino Acid	Glutathione Metabolism
cysteinylglycine	-0.144831	0.0562196	0.225109	Amino Acid	Glutathione Metabolism
sarcosine	-0.0431198	0.393448	0.640665	Amino Acid	Glycine, Serine and Threonine Metabolism
betaine	-0.0727436	0.105822	0.318851	Amino Acid	Glycine, Serine and Threonine Metabolism
allo-threonine	-0.0984897	0.156438	0.384757	Amino Acid	Glycine, Serine and Threonine Metabolism
dimethylglycine	-0.11113	0.0396482	0.187132	Amino Acid	Glycine, Serine and Threonine Metabolism
N-acetylhistidine	-0.0227365	0.697619	0.83228	Amino Acid	Histidine Metabolism
1-methyl-4-imidazoleacetate	-0.0903155	0.183231	0.423206	Amino Acid	Histidine Metabolism
imidazole propionate	-0.120855	0.276618	0.547039	Amino Acid	Histidine Metabolism
N-acetyl-3-methylhistidine*	-0.133698	0.137375	0.357908	Amino Acid	Histidine Metabolism
1-methylhistidine	-0.175823	0.0195217	0.128005	Amino Acid	Histidine Metabolism
3-methylhistidine	-0.180286	0.0446056	0.199907	Amino Acid	Histidine Metabolism
N2-acetyllysine	-0.0316125	0.659341	0.80522	Amino Acid	Lysine Metabolism
5-aminovalerate	-0.0344708	0.609552	0.786741	Amino Acid	Lysine Metabolism
N6-acetyllysine	-0.0564832	0.321646	0.587807	Amino Acid	Lysine Metabolism
pipecolate	-0.0568376	0.458725	0.687384	Amino Acid	Lysine Metabolism
5-(galactosylhydroxy)-L-lysine	-0.127945	0.0702762	0.257969	Amino Acid	Lysine Metabolism
6-oxopiperidine-2-carboxylate	-0.131759	0.0272003	0.152728	Amino Acid	Lysine Metabolism
cystine	-0.0442573	0.488542	0.709172	Amino Acid	Methionine, Cysteine, SAM and Taurine Metabolism
N-acetylmethionine	-0.0477802	0.468248	0.695255	Amino Acid	Methionine, Cysteine, SAM and Taurine Metabolism
methionine	-0.0492285	0.374899	0.61871	Amino Acid	Methionine, Cysteine, SAM and Taurine Metabolism
N-formylmethionine	-0.0761645	0.125	0.341132	Amino Acid	Methionine, Cysteine, SAM and Taurine Metabolism
N-methyltaurine	-0.0773106	0.11399	0.329491	Amino Acid	Methionine, Cysteine, SAM and Taurine Metabolism
alpha-ketobutyrate	-0.0785645	0.150002	0.378297	Amino Acid	Methionine, Cysteine, SAM and Taurine Metabolism
cysteine s-sulfate	-0.0825065	0.222027	0.477873	Amino Acid	Methionine, Cysteine, SAM and Taurine Metabolism
methionine sulfoxide	-0.0846492	0.203062	0.453986	Amino Acid	Methionine, Cysteine, SAM and Taurine Metabolism
cysteine sulfinic acid	-0.0893999	0.036106	0.179139	Amino Acid	Methionine, Cysteine, SAM and Taurine Metabolism
N-acetyltaurine	-0.113832	0.0799786	0.274172	Amino Acid	Methionine, Cysteine, SAM and Taurine Metabolism
cystathionine	-0.158353	0.0466	0.201858	Amino Acid	Methionine, Cysteine, SAM and Taurine Metabolism
phenylpyruvate	-0.0376358	0.480553	0.706016	Amino Acid	Phenylalanine Metabolism
phenylalanine	-0.0595041	0.128787	0.347583	Amino Acid	Phenylalanine Metabolism
phenylacetate	-0.0598035	0.495639	0.71302	Amino Acid	Phenylalanine Metabolism
4-hydroxyphenylacetate	-0.0752342	0.399689	0.645448	Amino Acid	Phenylalanine Metabolism
phenyllactate (PLA)	-0.124931	0.0464243	0.201858	Amino Acid	Phenylalanine Metabolism
N-acetylputrescine	-0.00466067	0.933116	0.960696	Amino Acid	Polyamine Metabolism
spermidine	-0.0216989	0.731785	0.853041	Amino Acid	Polyamine Metabolism
4-acetamidobutanoate	-0.0578007	0.394182	0.640791	Amino Acid	Polyamine Metabolism
N-acetyl-isoputreanine*	-0.164624	0.0273592	0.152743	Amino Acid	Polyamine Metabolism
N1,N12-diacetylspermine	-0.179833	0.0369928	0.179139	Amino Acid	Polyamine Metabolism
3-methylglutarylcarnitine (C6-DC)	-0.042628	0.605481	0.786741	Amino Acid	Short-chain Acylcarnitine
isobutyrylcarnitine (C4)	-0.149857	0.0745837	0.263792	Amino Acid	Short-chain Acylcarnitine
tryptophan	-0.0212099	0.633433	0.794821	Amino Acid	Tryptophan Metabolism
indolepropionate	-0.0370063	0.659056	0.80522	Amino Acid	Tryptophan Metabolism
serotonin	-0.0687216	0.429793	0.670173	Amino Acid	Tryptophan Metabolism
tryptophan betaine	-0.0744089	0.554015	0.750725	Amino Acid	Tryptophan Metabolism
N-acetyltryptophan	-0.0952629	0.632421	0.794821	Amino Acid	Tryptophan Metabolism
C-glycosyltryptophan	-0.125616	0.025951	0.148151	Amino Acid	Tryptophan Metabolism
xanthurenate	-0.127279	0.181689	0.422564	Amino Acid	Tryptophan Metabolism
3-indoxyl sulfate	-0.144268	0.139251	0.361831	Amino Acid	Tryptophan Metabolism
indole-3-carboxylate	-0.145433	0.0260818	0.148151	Amino Acid	Tryptophan Metabolism
kynurenine	-0.149352	0.0140055	0.104453	Amino Acid	Tryptophan Metabolism
indoleacetylglutamine	-0.202428	0.0359563	0.179139	Amino Acid	Tryptophan Metabolism
4-hydroxyphenylpyruvate	-0.0236117	0.707569	0.837933	Amino Acid	Tyrosine Metabolism
tyrosine	-0.0417697	0.345309	0.59711	Amino Acid	Tyrosine Metabolism
3-methoxytyrosine	-0.0487939	0.672814	0.813725	Amino Acid	Tyrosine Metabolism
dopamine 3-O-sulfate	-0.0509032	0.565043	0.758307	Amino Acid	Tyrosine Metabolism
4-methoxyphenol sulfate	-0.0571528	0.52939	0.738878	Amino Acid	Tyrosine Metabolism
N-formylphenylalanine	-0.083523	0.314393	0.579935	Amino Acid	Tyrosine Metabolism
vanillylmandelate (VMA)	-0.0896925	0.195529	0.442204	Amino Acid	Tyrosine Metabolism
dopamine 4-sulfate	-0.0953942	0.32188	0.587807	Amino Acid	Tyrosine Metabolism
3-hydroxyphenylacetate sulfate	-0.106039	0.0327513	0.170202	Amino Acid	Tyrosine Metabolism
3,4-dihydroxyphenylacetate sulfate	-0.107132	0.051497	0.214096	Amino Acid	Tyrosine Metabolism
homovanillate (HVA)	-0.120042	0.0768897	0.27022	Amino Acid	Tyrosine Metabolism
vanillic alcohol sulfate	-0.126877	0.165016	0.397253	Amino Acid	Tyrosine Metabolism
p-cresol glucuronide*	-0.139247	0.180584	0.422564	Amino Acid	Tyrosine Metabolism
indoxyl glucuronide	-0.146032	0.119628	0.33489	Amino Acid	Tyrosine Metabolism
3-methoxytyramine sulfate	-0.179364	0.0651491	0.247668	Amino Acid	Tyrosine Metabolism
vanillactate	-0.22694	0.0899853	0.294552	Amino Acid	Tyrosine Metabolism
N-methylhydroxyproline	-0.0255167	0.718235	0.844423	Amino Acid	Urea cycle; Arginine and Proline Metabolism
N-delta-acetylornithine	-0.0362321	0.607484	0.786741	Amino Acid	Urea cycle; Arginine and Proline Metabolism
N-acetylproline	-0.0505612	0.450825	0.683063	Amino Acid	Urea cycle; Arginine and Proline Metabolism
N-methylproline	-0.0616187	0.502106	0.71719	Amino Acid	Urea cycle; Arginine and Proline Metabolism
homoarginine	-0.0646387	0.362571	0.614416	Amino Acid	Urea cycle; Arginine and Proline Metabolism
N-acetylarginine	-0.0659604	0.304329	0.57622	Amino Acid	Urea cycle; Arginine and Proline Metabolism
dimethylarginine (ADMA + SDMA)	-0.0866247	0.0599869	0.232837	Amino Acid	Urea cycle; Arginine and Proline Metabolism
homocitrulline	-0.140317	0.0958919	0.300668	Amino Acid	Urea cycle; Arginine and Proline Metabolism
N2,N5-diacetylornithine	-0.15892	0.0873093	0.292127	Amino Acid	Urea cycle; Arginine and Proline Metabolism
N6-carboxymethyllysine	-0.112832	0.106716	0.318851	Carbohydrate	Advanced Glycation End-product
N-acetylglucosamine/N-acetylgalactosamine	-0.0757764	0.0910147	0.294732	Carbohydrate	Aminosugar Metabolism
erythronate*	-0.1342	0.022766	0.139015	Carbohydrate	Aminosugar Metabolism
glucuronate	-0.164905	0.0564518	0.225116	Carbohydrate	Aminosugar Metabolism
sucrose	-0.0817948	0.360778	0.613478	Carbohydrate	Disaccharides and Oligosaccharides
galactonate	-0.0377096	0.610579	0.786741	Carbohydrate	Fructose, Mannose and Galactose Metabolism
mannitol/sorbitol	-0.0651766	0.536749	0.741697	Carbohydrate	Fructose, Mannose and Galactose Metabolism
mannose	-0.100369	0.0286014	0.156109	Carbohydrate	Fructose, Mannose and Galactose Metabolism
maltotetraose	-0.00936796	0.889986	0.934964	Carbohydrate	Glycogen Metabolism
1,5-anhydroglucitol (1,5-AG)	-0.0518351	0.516524	0.72806	Carbohydrate	Glycolysis, Gluconeogenesis, and Pyruvate Metabolism
ribonate (ribonolactone)	-0.0589794	0.260908	0.527758	Carbohydrate	Pentose Metabolism
ribitol	-0.067203	0.148329	0.377104	Carbohydrate	Pentose Metabolism
arabinose	-0.071764	0.211624	0.464325	Carbohydrate	Pentose Metabolism
arabonate/xylonate	-0.0949074	0.131642	0.349494	Carbohydrate	Pentose Metabolism
xylose	-0.0972829	0.103725	0.316985	Carbohydrate	Pentose Metabolism
ribulonate/xylulonate*	-0.111207	0.0728104	0.261528	Carbohydrate	Pentose Metabolism
arabitol/xylitol	-0.123257	0.0528473	0.216033	Carbohydrate	Pentose Metabolism
gulonate*	-0.155566	0.051727	0.214141	Cofactors and Vitamins	Ascorbate and Aldarate Metabolism
heme	-0.0284654	0.732907	0.853041	Cofactors and Vitamins	Hemoglobin and Porphyrin Metabolism
biliverdin	-0.0366825	0.574546	0.765801	Cofactors and Vitamins	Hemoglobin and Porphyrin Metabolism
bilirubin (E,Z or Z,E)*	-0.0512959	0.368709	0.615254	Cofactors and Vitamins	Hemoglobin and Porphyrin Metabolism
bilirubin	-0.059315	0.348647	0.599697	Cofactors and Vitamins	Hemoglobin and Porphyrin Metabolism
I-urobilinogen	-0.113551	0.211964	0.464325	Cofactors and Vitamins	Hemoglobin and Porphyrin Metabolism
D-urobilin	-0.146962	0.0896828	0.294552	Cofactors and Vitamins	Hemoglobin and Porphyrin Metabolism
L-urobilin	-0.216226	0.0511535	0.213628	Cofactors and Vitamins	Hemoglobin and Porphyrin Metabolism
nicotinamide	-0.0313688	0.601673	0.786741	Cofactors and Vitamins	Nicotinate and Nicotinamide Metabolism
1-methylnicotinamide	-0.0718886	0.309077	0.578353	Cofactors and Vitamins	Nicotinate and Nicotinamide Metabolism
trigonelline (N'-methylnicotinate)	-0.0864406	0.4532	0.683063	Cofactors and Vitamins	Nicotinate and Nicotinamide Metabolism
nicotinamide riboside	-0.116701	0.080368	0.274544	Cofactors and Vitamins	Nicotinate and Nicotinamide Metabolism
N1-Methyl-2-pyridone-5-carboxamide	-0.159032	0.0282271	0.155807	Cofactors and Vitamins	Nicotinate and Nicotinamide Metabolism
quinolinate	-0.206477	0.0390397	0.185154	Cofactors and Vitamins	Nicotinate and Nicotinamide Metabolism
pantothenate (Vitamin B5)	-0.0278899	0.637157	0.794821	Cofactors and Vitamins	Pantothenate and CoA Metabolism
riboflavin (Vitamin B2)	-0.0496843	0.444653	0.680499	Cofactors and Vitamins	Riboflavin Metabolism
thiamin (Vitamin B1)	-0.0415961	0.647063	0.79922	Cofactors and Vitamins	Thiamine Metabolism
gamma-CEHC	-0.0221329	0.776554	0.878117	Cofactors and Vitamins	Tocopherol Metabolism
delta-CEHC glucuronide*	-0.0942801	0.148513	0.377104	Cofactors and Vitamins	Tocopherol Metabolism
alpha-CEHC glucuronide*	-0.120247	0.23413	0.491925	Cofactors and Vitamins	Tocopherol Metabolism
gamma-CEHC sulfate*	-0.126581	0.0747906	0.263792	Cofactors and Vitamins	Tocopherol Metabolism
alpha-CEHC sulfate	-0.127331	0.245799	0.50557	Cofactors and Vitamins	Tocopherol Metabolism
gamma-CEHC glucuronide*	-0.198977	0.041206	0.189897	Cofactors and Vitamins	Tocopherol Metabolism
retinol (Vitamin A)	-0.0297376	0.638031	0.794821	Cofactors and Vitamins	Vitamin A Metabolism
pyridoxine (Vitamin B6)	-0.0180142	0.27897	0.548398	Cofactors and Vitamins	Vitamin B6 Metabolism
pyridoxal	-0.112126	0.0897212	0.294552	Cofactors and Vitamins	Vitamin B6 Metabolism
phosphate	-0.033146	0.335583	0.591951	Energy	Oxidative Phosphorylation
succinate	-0.00335678	0.956187	0.97249	Energy	TCA Cycle
aconitate [cis or trans]	-0.00700329	0.894981	0.937188	Energy	TCA Cycle
fumarate	-0.0683041	0.355508	0.607222	Energy	TCA Cycle
malate	-0.0763072	0.283647	0.553141	Energy	TCA Cycle
epiandrosterone sulfate	-0.0544868	0.628787	0.794821	Lipid	Androgenic Steroids
etiocholanolone glucuronide	-0.0837485	0.302657	0.574598	Lipid	Androgenic Steroids
androstenediol (3beta,17beta) monosulfate (1)	-0.0981515	0.310191	0.578353	Lipid	Androgenic Steroids
5alpha-androstan-3beta,17beta-diol monosulfate (2)	-0.106594	0.180836	0.422564	Lipid	Androgenic Steroids
11-ketoetiocholanolone glucuronide	-0.113215	0.12474	0.341132	Lipid	Androgenic Steroids
5alpha-androstan-3alpha,17beta-diol monosulfate (1)	-0.122217	0.165081	0.397253	Lipid	Androgenic Steroids
androstenediol (3beta,17beta) disulfate (2)	-0.127675	0.0660469	0.249142	Lipid	Androgenic Steroids
androstenediol (3alpha, 17alpha) monosulfate (3)	-0.193458	0.0488257	0.206505	Lipid	Androgenic Steroids
androstenediol (3beta,17beta) disulfate (1)	-0.205633	0.0141734	0.104905	Lipid	Androgenic Steroids
androsterone glucuronide	-0.234773	0.0173729	0.122111	Lipid	Androgenic Steroids
carnitine	-0.0840615	0.108677	0.318851	Lipid	Carnitine Metabolism
cortisol	-0.0320362	0.577193	0.767109	Lipid	Corticosteroids
cortisol 21-glucuronide	-0.148751	0.0522081	0.214316	Lipid	Corticosteroids
palmitoyl-linoleoyl-glycerol (16:0/18:2) [1]*	-0.000812703	0.989641	0.996677	Lipid	Diacylglycerol
leukotriene B4	-0.021015	0.755278	0.865073	Lipid	Eicosanoid
N-oleoylserine	-0.00702334	0.882339	0.932904	Lipid	Endocannabinoid
N-stearoyltaurine	-0.0473638	0.398627	0.644798	Lipid	Endocannabinoid
N-palmitoylserine	-0.120967	0.0371395	0.179139	Lipid	Endocannabinoid
estrone 3-sulfate	-0.067383	0.214675	0.468163	Lipid	Estrogenic Steroids
arachidonoylcholine	-0.0388208	0.576073	0.766789	Lipid	Fatty Acid Metabolism (Acyl Choline)
palmitoylcholine	-0.0539769	0.41606	0.658818	Lipid	Fatty Acid Metabolism (Acyl Choline)
dihomo-linolenoyl-choline	-0.0627358	0.361054	0.613478	Lipid	Fatty Acid Metabolism (Acyl Choline)
oleoylcholine	-0.0646713	0.324953	0.589015	Lipid	Fatty Acid Metabolism (Acyl Choline)
linoleoylcholine*	-0.0651657	0.336652	0.591951	Lipid	Fatty Acid Metabolism (Acyl Choline)
docosahexaenoylcholine	-0.0677385	0.294576	0.566847	Lipid	Fatty Acid Metabolism (Acyl Choline)
stearoylcholine*	-0.0764622	0.275736	0.546438	Lipid	Fatty Acid Metabolism (Acyl Choline)
hexanoylglutamine	-0.0539407	0.486805	0.70775	Lipid	Fatty Acid Metabolism (Acyl Glutamine)
methylmalonate (MMA)	-0.0780208	0.283342	0.553141	Lipid	Fatty Acid Metabolism (also BCAA Metabolism)
N-acetyl-2-aminooctanoate*	-0.10403	0.18289	0.423206	Lipid	Fatty Acid, Amino
pristanate	-0.06611	0.366124	0.614416	Lipid	Fatty Acid, Branched
octadecanedioate (C18)	-0.0100878	0.88882	0.934744	Lipid	Fatty Acid, Dicarboxylate
azelate (nonanedioate; C9)	-0.0125145	0.832965	0.904244	Lipid	Fatty Acid, Dicarboxylate
2-hydroxyglutarate	-0.0140884	0.774632	0.876959	Lipid	Fatty Acid, Dicarboxylate
hexadecanedioate (C16)	-0.0172243	0.80433	0.890774	Lipid	Fatty Acid, Dicarboxylate
glutarate (C5-DC)	-0.0195145	0.787889	0.884034	Lipid	Fatty Acid, Dicarboxylate
octadecenedioate (C18:1-DC)*	-0.0261081	0.704865	0.835745	Lipid	Fatty Acid, Dicarboxylate
3-hydroxyadipate*	-0.0354595	0.614402	0.787463	Lipid	Fatty Acid, Dicarboxylate
tetradecanedioate (C14)	-0.0469274	0.453343	0.683063	Lipid	Fatty Acid, Dicarboxylate
dodecenedioate (C12:1-DC)*	-0.0482087	0.492609	0.710899	Lipid	Fatty Acid, Dicarboxylate
sebacate (C10-DC)	-0.0777144	0.231664	0.488845	Lipid	Fatty Acid, Dicarboxylate
suberate (C8-DC)	-0.0779398	0.235869	0.493446	Lipid	Fatty Acid, Dicarboxylate
octadecadienedioate (C18:2-DC)*	-0.0884125	0.157184	0.384757	Lipid	Fatty Acid, Dicarboxylate
3-carboxy-4-methyl-5-pentyl-2-furanpropionate (3-CMPFP)	-0.105138	0.143067	0.367834	Lipid	Fatty Acid, Dicarboxylate
hexadecenedioate (C16:1-DC)*	-0.111813	0.0913024	0.294732	Lipid	Fatty Acid, Dicarboxylate
heptenedioate (C7:1-DC)*	-0.12323	0.0901444	0.294552	Lipid	Fatty Acid, Dicarboxylate
2-hydroxyadipate	-0.125703	0.0797098	0.274172	Lipid	Fatty Acid, Dicarboxylate
hydroxy-CMPF*	-0.141006	0.130154	0.348783	Lipid	Fatty Acid, Dicarboxylate
3-methyladipate	-0.182144	0.0182519	0.1247	Lipid	Fatty Acid, Dicarboxylate
maleate	-0.235431	0.091406	0.294732	Lipid	Fatty Acid, Dicarboxylate
9,10-DiHOME	-0.108013	0.123255	0.338257	Lipid	Fatty Acid, Dihydroxy
2-hydroxylaurate	-0.0139456	0.810619	0.894887	Lipid	Fatty Acid, Monohydroxy
2-hydroxydecanoate	-0.0208265	0.712888	0.843034	Lipid	Fatty Acid, Monohydroxy
5-hydroxyvalproate	-0.0235016	0.611194	0.786741	Lipid	Fatty Acid, Monohydroxy
2-hydroxybehenate	-0.0253581	0.596645	0.784553	Lipid	Fatty Acid, Monohydroxy
3-hydroxyhexanoate	-0.0311314	0.624196	0.79451	Lipid	Fatty Acid, Monohydroxy
2-hydroxypalmitate	-0.061442	0.201307	0.451094	Lipid	Fatty Acid, Monohydroxy
2-hydroxynervonate*	-0.0622598	0.182087	0.422564	Lipid	Fatty Acid, Monohydroxy
2-hydroxystearate	-0.0773335	0.110288	0.322609	Lipid	Fatty Acid, Monohydroxy
5-hydroxyhexanoate	-0.0966789	0.112194	0.32623	Lipid	Fatty Acid, Monohydroxy
2-hydroxyoctanoate	-0.113212	0.0579981	0.230342	Lipid	Fatty Acid, Monohydroxy
glycerophosphoglycerol	-0.011919	0.864305	0.92459	Lipid	Glycerolipid Metabolism
myo-inositol	-0.160083	0.0176001	0.122823	Lipid	Inositol Metabolism
acetoacetate	-0.0765347	0.466253	0.694208	Lipid	Ketone Bodies
lactosyl-N-palmitoyl-sphingosine (d18:1/16:0)	-0.0279077	0.559	0.753301	Lipid	Lactosylceramide
acetylcarnitine (C2)	-0.128652	0.0473009	0.202688	Lipid	Short-chain Acylcarnitine
3-hydroxybutyrylcarnitine (C3-DC)	-0.0975575	0.188174	0.431288	Lipid	Short-chain Acylcarnitine
butyrylcarnitine (C4)	-0.020283	0.777533	0.878208	Lipid	Short-chain Acylcarnitine
3-hydroxybutyrylcarnitine (C4-OH)	-0.020951	0.839685	0.908496	Lipid	Short-chain Acylcarnitine
hexanoylcarnitine (C6)	-0.113823	0.116266	0.331172	Lipid	Short-chain Acylcarnitine
adipoylcarnitine (C6-DC)	-0.15392	0.0716443	0.26021	Lipid	Short-chain Acylcarnitine
suberoylcarnitine (C8-DC)	-0.182611	0.0346285	0.175296	Lipid	Medium-chain Acylcarnitine
laurylcarnitine (C12)	-0.112026	0.0727874	0.261528	Lipid	Medium-chain Acylcarnitine
5-dodecenoylcarnitine (C12:1)	-0.155338	0.0208524	0.133156	Lipid	Medium-chain Acylcarnitine
myristoleoylcarnitine (C14:1)*	-0.066153	0.315943	0.581312	Lipid	Medium-chain Acylcarnitine
octadecanedioylcarnitine (C18-DC)*	-0.124992	0.0671043	0.251191	Lipid	Long-chain Acylcarnitine
octadecenedioylcarnitine (C18:1-DC)*	-0.134793	0.0978893	0.305552	Lipid	Long-chain Acylcarnitine
arachidonoylcarnitine (C20:4)	-0.00868019	0.893228	0.937188	Lipid	Long-chain Acylcarnitine
docosapentaenoylcarnitine (C22:5n3)*	-0.00744149	0.909565	0.944363	Lipid	Long-chain Acylcarnitine
adrenoylcarnitine (C22:4)*	-0.00886019	0.896059	0.937312	Lipid	Long-chain Acylcarnitine
docosahexaenoylcarnitine (C22:6)*	-0.0918136	0.178905	0.42118	Lipid	Long-chain Acylcarnitine
nervonoylcarnitine (C24:1)*	-0.0153248	0.802161	0.890746	Lipid	Long-chain Acylcarnitine
cerotoylcarnitine (C26)*	-0.000812548	0.988878	0.996677	Lipid	Long-chain Acylcarnitine
ximenoylcarnitine (C26:1)*	-0.00884339	0.884206	0.932904	Lipid	Long-chain Acylcarnitine
1-cerotoyl-GPC (26:0)*	-0.0474559	0.489234	0.709172	Lipid	Lysophospholipid
1-palmitoyl-GPG (16:0)*	-0.0825076	0.155308	0.383171	Lipid	Lysophospholipid
1-linoleoyl-GPG (18:2)*	-0.0842727	0.0745139	0.263792	Lipid	Lysophospholipid
1-oleoyl-GPG (18:1)*	-0.147544	0.0192982	0.128005	Lipid	Lysophospholipid
10-undecenoate (11:1n1)	-0.00383879	0.956133	0.97249	Lipid	Medium Chain Fatty Acid
pelargonate (9:0)	-0.116077	0.0466783	0.201858	Lipid	Medium Chain Fatty Acid
heptanoate (7:0)	-0.123802	0.0370045	0.179139	Lipid	Medium Chain Fatty Acid
3-hydroxy-3-methylglutarate	-0.10273	0.116855	0.331883	Lipid	Mevalonate Metabolism
2-oleoylglycerol (18:1)	-0.0147146	0.845926	0.911213	Lipid	Monoacylglycerol
1-myristoylglycerol (14:0)	-0.0234454	0.729389	0.853041	Lipid	Monoacylglycerol
1-oleoyl-2-docosahexaenoyl-GPC (18:1/22:6)*	-0.0129549	0.772488	0.875546	Lipid	Phosphatidylcholine
1,2-dipalmitoyl-GPC (16:0/16:0)	-0.0383917	0.28029	0.548998	Lipid	Phosphatidylcholine
1-palmitoyl-2-stearoyl-GPE (16:0/18:0)*	-0.0035239	0.956029	0.97249	Lipid	Phosphatidylethanolamine
1-palmitoyl-2-linoleoyl-GPE (16:0/18:2)	-0.00476984	0.938971	0.962617	Lipid	Phosphatidylethanolamine
1,2-dipalmitoyl-GPE (16:0/16:0)*	-0.0131123	0.817625	0.899572	Lipid	Phosphatidylethanolamine
1,2-dilinoleoyl-GPE (18:2/18:2)*	-0.0223324	0.746328	0.859862	Lipid	Phosphatidylethanolamine
1-palmitoyl-2-oleoyl-GPE (16:0/18:1)	-0.0249326	0.701091	0.83228	Lipid	Phosphatidylethanolamine
1-oleoyl-2-linoleoyl-GPE (18:1/18:2)*	-0.0291557	0.629338	0.794821	Lipid	Phosphatidylethanolamine
phosphocholine	-0.00904034	0.871698	0.927097	Lipid	Phospholipid Metabolism
choline	-0.0998478	0.0226712	0.139015	Lipid	Phospholipid Metabolism
trimethylamine N-oxide	-0.134788	0.122355	0.336733	Lipid	Phospholipid Metabolism
1-(1-enyl-palmitoyl)-2-arachidonoyl-GPC (P-16:0/20:4)*	-0.00502569	0.933952	0.960696	Lipid	Plasmalogen
1-(1-enyl-palmitoyl)-2-palmitoleoyl-GPC (P-16:0/16:1)*	-0.0122961	0.816139	0.898949	Lipid	Plasmalogen
docosadienoate (22:2n6)	-0.00234438	0.966417	0.97945	Lipid	Polyunsaturated Fatty Acid (n3 and n6)
eicosapentaenoate (EPA; 20:5n3)	-0.0304537	0.688999	0.827701	Lipid	Polyunsaturated Fatty Acid (n3 and n6)
21-hydroxypregnanolone disulfate	-0.0393381	0.462278	0.690589	Lipid	Pregnenolone Steroids
pregnenolone sulfate	-0.0398914	0.596641	0.784553	Lipid	Pregnenolone Steroids
21-hydroxypregnenolone disulfate	-0.0607572	0.411774	0.654151	Lipid	Pregnenolone Steroids
pregnenediol sulfate (C21H34O5S)*	-0.08644	0.254041	0.517777	Lipid	Pregnenolone Steroids
glyco-beta-muricholate	-0.00272065	0.978639	0.987738	Lipid	Primary Bile Acid Metabolism
glyco-alpha-muricholate	-0.0364001	0.652581	0.802811	Lipid	Primary Bile Acid Metabolism
tauro-beta-muricholate	-0.053576	0.63846	0.794821	Lipid	Primary Bile Acid Metabolism
glycocholate sulfate	-0.131685	0.121245	0.336525	Lipid	Primary Bile Acid Metabolism
glycocholate	-0.156231	0.0923748	0.295902	Lipid	Primary Bile Acid Metabolism
glycocholate glucuronide (1)	-0.161926	0.0361228	0.179139	Lipid	Primary Bile Acid Metabolism
taurocholate	-0.162629	0.153211	0.378954	Lipid	Primary Bile Acid Metabolism
glycochenodeoxycholate	-0.200029	0.0388207	0.185014	Lipid	Primary Bile Acid Metabolism
taurochenodeoxycholate	-0.23867	0.0472966	0.202688	Lipid	Primary Bile Acid Metabolism
5alpha-pregnan-3beta,20alpha-diol disulfate	-0.109936	0.245556	0.50557	Lipid	Progestin Steroids
5alpha-pregnan-diol disulfate	-0.113492	0.280399	0.548998	Lipid	Progestin Steroids
glycoursodeoxycholate	-0.0211165	0.822598	0.900985	Lipid	Secondary Bile Acid Metabolism
taurolithocholate	-0.0251438	0.753246	0.864244	Lipid	Secondary Bile Acid Metabolism
deoxycholate	-0.029623	0.740782	0.857516	Lipid	Secondary Bile Acid Metabolism
glycolithocholate	-0.0311338	0.733423	0.853041	Lipid	Secondary Bile Acid Metabolism
tauroursodeoxycholate	-0.0315734	0.760422	0.866185	Lipid	Secondary Bile Acid Metabolism
glycodeoxycholate	-0.0591922	0.547674	0.74836	Lipid	Secondary Bile Acid Metabolism
glycohyocholate	-0.142463	0.113549	0.32919	Lipid	Secondary Bile Acid Metabolism
taurodeoxycholate	-0.152765	0.139659	0.361929	Lipid	Secondary Bile Acid Metabolism
taurolithocholate 3-sulfate	-0.274304	0.0229614	0.139337	Lipid	Secondary Bile Acid Metabolism
4-cholesten-3-one	-0.0544189	0.308669	0.578353	Lipid	Sterol
7-HOCA	-0.101676	0.082968	0.280483	Lipid	Sterol
3beta,7alpha-dihydroxy-5-cholestenoate	-0.145083	0.0336186	0.171966	Lipid	Sterol
hypoxanthine	-0.00416522	0.95142	0.97232	Nucleotide	Purine Metabolism
inosine 5'-monophosphate (IMP)	-0.00492789	0.946945	0.96876	Nucleotide	Purine Metabolism
N6-methyladenosine	-0.019709	0.714465	0.843034	Nucleotide	Purine Metabolism
guanosine	-0.0606048	0.340992	0.595849	Nucleotide	Purine Metabolism
1-methyladenosine	-0.06414	0.129445	0.348397	Nucleotide	Purine Metabolism
xanthine	-0.0969031	0.107615	0.318851	Nucleotide	Purine Metabolism
7-methylguanine	-0.0986072	0.0460525	0.201858	Nucleotide	Purine Metabolism
N6-succinyladenosine	-0.115787	0.137207	0.357908	Nucleotide	Purine Metabolism
inosine	-0.120011	0.363862	0.614416	Nucleotide	Purine Metabolism
urate	-0.130688	0.0163846	0.117704	Nucleotide	Purine Metabolism
adenine	-0.154528	0.0182502	0.1247	Nucleotide	Purine Metabolism
uracil	-0.0290885	0.586775	0.774486	Nucleotide	Pyrimidine Metabolism
2'-deoxyuridine	-0.0400107	0.49734	0.713511	Nucleotide	Pyrimidine Metabolism
5,6-dihydrothymine	-0.0525344	0.328553	0.58991	Nucleotide	Pyrimidine Metabolism
5,6-dihydrouracil	-0.0533481	0.363571	0.614416	Nucleotide	Pyrimidine Metabolism
5,6-dihydrouridine	-0.0941171	0.107788	0.318851	Nucleotide	Pyrimidine Metabolism
cytidine	-0.11172	0.0934824	0.298472	Nucleotide	Pyrimidine Metabolism
pseudouridine	-0.119328	0.0241354	0.143782	Nucleotide	Pyrimidine Metabolism
N-acetyl-beta-alanine	-0.1258	0.0191503	0.128005	Nucleotide	Pyrimidine Metabolism
2'-O-methyluridine	-0.127234	0.0308713	0.16392	Nucleotide	Pyrimidine Metabolism
dihydroorotate	-0.130259	0.0596684	0.232837	Nucleotide	Pyrimidine Metabolism
3-ureidopropionate	-0.139722	0.0779725	0.271964	Nucleotide	Pyrimidine Metabolism
orotate	-0.172249	0.0439444	0.198767	Nucleotide	Pyrimidine Metabolism
glucuronide of C10H18O2 (1)*	-0.0565198	0.259816	0.52664	Partially Characterized Molecules	Partially Characterized Molecules
glucuronide of C10H18O2 (8)*	-0.0672045	0.24393	0.504915	Partially Characterized Molecules	Partially Characterized Molecules
glucuronide of C10H18O2 (7)*	-0.085345	0.313364	0.579935	Partially Characterized Molecules	Partially Characterized Molecules
glucuronide of C8H14O2 (3)*	-0.0865982	0.466832	0.694208	Partially Characterized Molecules	Partially Characterized Molecules
glucuronide of C14H22O4 (2)*	-0.144965	0.0405594	0.188698	Partially Characterized Molecules	Partially Characterized Molecules
glycine conjugate of C10H14O2 (1)*	-0.176548	0.0205297	0.131957	Partially Characterized Molecules	Partially Characterized Molecules
glucuronide of C8H16O2 (1)*	-0.257627	0.148267	0.377104	Partially Characterized Molecules	Partially Characterized Molecules
phenylacetylcarnitine	-0.0544904	0.542627	0.745347	Peptide	Acetylated Peptides
4-hydroxyphenylacetylglutamine	-0.0744995	0.483996	0.70775	Peptide	Acetylated Peptides
phenylacetylglutamine	-0.128311	0.0920506	0.295834	Peptide	Acetylated Peptides
phenylacetylhistidine	-0.129119	0.0872678	0.292127	Peptide	Acetylated Peptides
phenylacetylglutamate	-0.1794	0.0600562	0.232837	Peptide	Acetylated Peptides
phenylacetylmethionine	-0.254213	0.0197406	0.128577	Peptide	Acetylated Peptides
valylglycine	-0.0329398	0.66624	0.809665	Peptide	Dipeptide
isoleucylglycine	-0.0433372	0.476988	0.702892	Peptide	Dipeptide
histidylalanine	-0.0759822	0.141392	0.365417	Peptide	Dipeptide
prolylglycine	-0.10592	0.106371	0.318851	Peptide	Dipeptide
ADSGEGDFXAEGGGVR*	-0.0142023	0.779981	0.878935	Peptide	Fibrinogen Cleavage Peptide
gamma-glutamylvaline	-0.0241319	0.638642	0.794821	Peptide	Gamma-glutamyl Amino Acid
gamma-glutamylhistidine	-0.0515166	0.308181	0.578353	Peptide	Gamma-glutamyl Amino Acid
gamma-glutamyltyrosine	-0.0594798	0.293673	0.566847	Peptide	Gamma-glutamyl Amino Acid
gamma-glutamylleucine	-0.0649524	0.15158	0.378398	Peptide	Gamma-glutamyl Amino Acid
gamma-glutamylphenylalanine	-0.0664189	0.205569	0.45854	Peptide	Gamma-glutamyl Amino Acid
HWESASLLR	-0.0198464	0.700488	0.83228	Peptide	Polypeptide
1H-indole-7-acetic acid	-0.100549	0.210956	0.464325	Xenobiotics	Bacterial/Fungal
N-methylpipecolate	-0.164203	0.049479	0.208366	Xenobiotics	Bacterial/Fungal
3-methyl catechol sulfate (1)	-0.01675	0.865916	0.92459	Xenobiotics	Benzoate Metabolism
3-methoxycatechol sulfate (2)	-0.0228313	0.672968	0.813725	Xenobiotics	Benzoate Metabolism
catechol sulfate	-0.0245105	0.820515	0.899735	Xenobiotics	Benzoate Metabolism
3-(3-hydroxyphenyl)propionate sulfate	-0.0352842	0.415163	0.658465	Xenobiotics	Benzoate Metabolism
4-acetylphenyl sulfate	-0.045523	0.553489	0.750725	Xenobiotics	Benzoate Metabolism
4-ethylphenyl sulfate	-0.0740558	0.531474	0.739122	Xenobiotics	Benzoate Metabolism
4-hydroxyhippurate	-0.0764135	0.374703	0.61871	Xenobiotics	Benzoate Metabolism
propyl 4-hydroxybenzoate sulfate	-0.0847571	0.411619	0.654151	Xenobiotics	Benzoate Metabolism
3-methoxycatechol sulfate (1)	-0.0886747	0.297452	0.567599	Xenobiotics	Benzoate Metabolism
o-cresol sulfate	-0.0962114	0.104148	0.316985	Xenobiotics	Benzoate Metabolism
hippurate	-0.0990108	0.335991	0.591951	Xenobiotics	Benzoate Metabolism
4-methylcatechol sulfate	-0.105319	0.333918	0.591951	Xenobiotics	Benzoate Metabolism
methyl-4-hydroxybenzoate sulfate	-0.105533	0.302884	0.574598	Xenobiotics	Benzoate Metabolism
4-vinylphenol sulfate	-0.124928	0.172989	0.412368	Xenobiotics	Benzoate Metabolism
p-cresol sulfate	-0.149381	0.127306	0.34632	Xenobiotics	Benzoate Metabolism
guaiacol sulfate	-0.169714	0.105594	0.318851	Xenobiotics	Benzoate Metabolism
4-methylguaiacol sulfate	-0.210445	0.0247796	0.145829	Xenobiotics	Benzoate Metabolism
2-methoxyresorcinol sulfate	-0.00552701	0.920543	0.953261	Xenobiotics	Chemical
thioproline	-0.0106387	0.837473	0.907108	Xenobiotics	Chemical
trizma acetate	-0.0142357	0.906647	0.944343	Xenobiotics	Chemical
ethyl glucuronide	-0.0616136	0.295706	0.567506	Xenobiotics	Chemical
perfluorooctanesulfonate (PFOS)	-0.0686686	0.420067	0.661945	Xenobiotics	Chemical
3-acetylphenol sulfate	-0.0936196	0.122002	0.336733	Xenobiotics	Chemical
3-hydroxypyridine sulfate	-0.0981765	0.481467	0.706296	Xenobiotics	Chemical
sulfate*	-0.0983174	0.0221507	0.138726	Xenobiotics	Chemical
dimethyl sulfone	-0.114233	0.181889	0.422564	Xenobiotics	Chemical
succinimide	-0.116295	0.0691177	0.255788	Xenobiotics	Chemical
2-aminophenol sulfate	-0.120168	0.170564	0.409437	Xenobiotics	Chemical
indoleacetylcarnitine*	-0.128624	0.152086	0.378398	Xenobiotics	Chemical
O-sulfo-L-tyrosine	-0.141013	0.015637	0.113165	Xenobiotics	Chemical
6-hydroxyindole sulfate	-0.154022	0.104116	0.316985	Xenobiotics	Chemical
2-methoxyacetaminophen glucuronide*	-0.00269443	0.970798	0.98287	Xenobiotics	Drug - Analgesics, Anesthetics
morphine-3-glucuronide	-0.0203179	0.760163	0.866185	Xenobiotics	Drug - Analgesics, Anesthetics
ibuprofen	-0.0256174	0.471395	0.696865	Xenobiotics	Drug - Analgesics, Anesthetics
3-(cystein-S-yl)acetaminophen*	-0.0266052	0.657411	0.80522	Xenobiotics	Drug - Analgesics, Anesthetics
2-hydroxyacetaminophen sulfate*	-0.0266384	0.799925	0.890121	Xenobiotics	Drug - Analgesics, Anesthetics
carboxyibuprofen	-0.026957	0.519853	0.72806	Xenobiotics	Drug - Analgesics, Anesthetics
2-hydroxyibuprofen	-0.0276812	0.262222	0.52932	Xenobiotics	Drug - Analgesics, Anesthetics
ibuprofen acyl glucuronide	-0.0279313	0.312158	0.579935	Xenobiotics	Drug - Analgesics, Anesthetics
4-aminophenol sulfate (2)	-0.0303201	0.406548	0.649015	Xenobiotics	Drug - Analgesics, Anesthetics
morphine-6-glucuronide	-0.0307996	0.486485	0.70775	Xenobiotics	Drug - Analgesics, Anesthetics
diclofenac	-0.0462849	0.606812	0.786741	Xenobiotics	Drug - Analgesics, Anesthetics
4-acetaminophen sulfate	-0.0567647	0.731377	0.853041	Xenobiotics	Drug - Analgesics, Anesthetics
2-methoxyacetaminophen sulfate*	-0.063845	0.451226	0.683063	Xenobiotics	Drug - Analgesics, Anesthetics
4-acetamidophenylglucuronide	-0.0920393	0.574467	0.765801	Xenobiotics	Drug - Analgesics, Anesthetics
desmethylnaproxen	-0.0942801	0.148513	0.377104	Xenobiotics	Drug - Analgesics, Anesthetics
3-(N-acetyl-L-cystein-S-yl) acetaminophen	-0.123206	0.233269	0.491171	Xenobiotics	Drug - Analgesics, Anesthetics
lidocaine	-0.150967	0.0950991	0.300668	Xenobiotics	Drug - Analgesics, Anesthetics
ciprofloxacin	-0.0155552	0.749289	0.861241	Xenobiotics	Drug - Antibiotic
amoxicillin	-0.0396204	0.65326	0.802811	Xenobiotics	Drug - Antibiotic
metronidazole	-0.0539624	0.320878	0.587807	Xenobiotics	Drug - Antibiotic
moxifloxacin	-0.0582885	0.24526	0.50557	Xenobiotics	Drug - Antibiotic
azithromycin	-0.0852839	0.174602	0.415052	Xenobiotics	Drug - Antibiotic
linezolid	-0.0948288	0.120069	0.335163	Xenobiotics	Drug - Antibiotic
candesartan	-0.0193697	0.780876	0.878935	Xenobiotics	Drug - Cardiovascular
valsartan	-0.0244719	0.668324	0.810114	Xenobiotics	Drug - Cardiovascular
furosemide	-0.0813105	0.454177	0.683063	Xenobiotics	Drug - Cardiovascular
lisinopril	-0.152064	0.108595	0.318851	Xenobiotics	Drug - Cardiovascular
famotidine	-0.0138051	0.831725	0.904244	Xenobiotics	Drug - Gastrointestinal
metoclopramide	-0.0405605	0.646284	0.79922	Xenobiotics	Drug - Gastrointestinal
omeprazole	-0.103672	0.31268	0.579935	Xenobiotics	Drug - Gastrointestinal
hydroxypioglitazone (M-IV)	-0.0162018	0.404867	0.649015	Xenobiotics	Drug - Metabolic
allopurinol	-0.056678	0.214651	0.468163	Xenobiotics	Drug - Metabolic
allopurinol riboside	-0.115427	0.19304	0.438604	Xenobiotics	Drug - Metabolic
oxypurinol	-0.23069	0.019989	0.129333	Xenobiotics	Drug - Metabolic
homoveratric acid	-0.00132705	0.900511	0.938953	Xenobiotics	Drug - Neurological
pregabalin	-0.00226653	0.463322	0.691093	Xenobiotics	Drug - Neurological
carbamazepine	-0.010238	0.934147	0.960696	Xenobiotics	Drug - Neurological
2-propyl-2-pentenoate (2-ene-valproate)	-0.0228252	0.643552	0.7983	Xenobiotics	Drug - Neurological
3-hydroxyvalproate	-0.0249919	0.543943	0.745347	Xenobiotics	Drug - Neurological
2-propyl-4-pentenoate (4-ene-valproate)	-0.0324629	0.494414	0.712452	Xenobiotics	Drug - Neurological
valproate (2-propylpentanoate)	-0.0332313	0.55372	0.750725	Xenobiotics	Drug - Neurological
levetiracetam	-0.0419271	0.557463	0.752825	Xenobiotics	Drug - Neurological
rocuronium	-0.049716	0.406294	0.649015	Xenobiotics	Drug - Neurological
lamotrigine	-0.0527513	0.353151	0.605313	Xenobiotics	Drug - Neurological
gabapentin	-0.0627404	0.435578	0.670173	Xenobiotics	Drug - Neurological
1-hydroxy-2-naphthalenecarboxylate	-0.0235816	0.788941	0.884034	Xenobiotics	Drug - Other
fosfomycin	-0.0994324	0.118467	0.333552	Xenobiotics	Drug - Other
S-carboxymethyl-L-cysteine	-0.197801	0.0155905	0.113165	Xenobiotics	Drug - Other
venlafaxine	-0.0188982	0.181553	0.422564	Xenobiotics	Drug - Psychoactive
O-desmethylvenlafaxine	-0.0311216	0.184731	0.425666	Xenobiotics	Drug - Psychoactive
quetiapine	-0.114824	0.11456	0.330163	Xenobiotics	Drug - Psychoactive
pseudoephedrine	-0.0169734	0.443337	0.680499	Xenobiotics	Drug - Respiratory
gluconate	-0.0132329	0.908409	0.944363	Xenobiotics	Food Component/Plant
piperine	-0.0173211	0.868119	0.924921	Xenobiotics	Food Component/Plant
sulfate of piperine metabolite C16H19NO3 (2)*	-0.0223225	0.762668	0.867435	Xenobiotics	Food Component/Plant
sulfate of piperine metabolite C16H19NO3 (3)*	-0.0329639	0.647065	0.79922	Xenobiotics	Food Component/Plant
glucuronide of piperine metabolite C17H21NO3 (4)*	-0.0365978	0.614315	0.787463	Xenobiotics	Food Component/Plant
ferulic acid 4-sulfate	-0.0458876	0.601144	0.786741	Xenobiotics	Food Component/Plant
glucuronide of piperine metabolite C17H21NO3 (3)*	-0.0537197	0.44929	0.683063	Xenobiotics	Food Component/Plant
alliin	-0.0550564	0.34397	0.595849	Xenobiotics	Food Component/Plant
methyl glucopyranoside (alpha + beta)	-0.0581648	0.597575	0.784719	Xenobiotics	Food Component/Plant
eugenol sulfate	-0.0605174	0.448654	0.683063	Xenobiotics	Food Component/Plant
glucuronide of piperine metabolite C17H21NO3 (5)*	-0.0673712	0.324058	0.588484	Xenobiotics	Food Component/Plant
homostachydrine*	-0.0739545	0.430183	0.670173	Xenobiotics	Food Component/Plant
2,8-quinolinediol sulfate	-0.0766362	0.22267	0.477873	Xenobiotics	Food Component/Plant
ergothioneine	-0.0785417	0.406012	0.649015	Xenobiotics	Food Component/Plant
N-acetylalliin	-0.08007	0.0999007	0.307896	Xenobiotics	Food Component/Plant
saccharin	-0.0814141	0.389065	0.637779	Xenobiotics	Food Component/Plant
1-kestose	-0.0831025	0.272723	0.542668	Xenobiotics	Food Component/Plant
thymol sulfate	-0.0881308	0.343516	0.595849	Xenobiotics	Food Component/Plant
quinate	-0.0894135	0.434479	0.670173	Xenobiotics	Food Component/Plant
N-(2-furoyl)glycine	-0.0920656	0.296242	0.567506	Xenobiotics	Food Component/Plant
daidzein sulfate (2)	-0.0940136	0.226459	0.482027	Xenobiotics	Food Component/Plant
4-allylphenol sulfate	-0.0960311	0.313896	0.579935	Xenobiotics	Food Component/Plant
tartarate	-0.117093	0.206625	0.459423	Xenobiotics	Food Component/Plant
genistein sulfate*	-0.118041	0.194106	0.440004	Xenobiotics	Food Component/Plant
indolin-2-one	-0.13864	0.0534899	0.217749	Xenobiotics	Food Component/Plant
sulfate of piperine metabolite C18H21NO3 (1)*	-0.141501	0.0901052	0.294552	Xenobiotics	Food Component/Plant
erythritol	-0.144072	0.0254811	0.147088	Xenobiotics	Food Component/Plant
2,3-dihydroxyisovalerate	-0.191733	0.0168554	0.120001	Xenobiotics	Food Component/Plant
stachydrine	-0.195952	0.111947	0.32623	Xenobiotics	Food Component/Plant
3-hydroxystachydrine*	-0.207083	0.116091	0.331172	Xenobiotics	Food Component/Plant
hydroxycotinine	-0.00605868	0.93665	0.962257	Xenobiotics	Tobacco Metabolite
3-hydroxycotinine glucuronide	-0.0289641	0.608253	0.786741	Xenobiotics	Tobacco Metabolite
cotinine N-oxide	-0.0324731	0.48577	0.70775	Xenobiotics	Tobacco Metabolite
norcotinine	-0.0428374	0.190179	0.434123	Xenobiotics	Tobacco Metabolite
cotinine	-0.0977372	0.396733	0.643114	Xenobiotics	Tobacco Metabolite
theobromine	-0.00524068	0.963298	0.978318	Xenobiotics	Xanthine Metabolism
5-acetylamino-6-amino-3-methyluracil	-0.0136353	0.880848	0.932382	Xenobiotics	Xanthine Metabolism
3-methylxanthine	-0.01937	0.830349	0.904244	Xenobiotics	Xanthine Metabolism
3,7-dimethylurate	-0.0371333	0.532997	0.739685	Xenobiotics	Xanthine Metabolism
paraxanthine	-0.0383254	0.620316	0.793257	Xenobiotics	Xanthine Metabolism
7-methylxanthine	-0.0404908	0.656122	0.80522	Xenobiotics	Xanthine Metabolism
caffeic acid sulfate	-0.0406021	0.624548	0.79451	Xenobiotics	Xanthine Metabolism
1,7-dimethylurate	-0.046781	0.587405	0.774486	Xenobiotics	Xanthine Metabolism
1,3,7-trimethylurate	-0.0535207	0.530529	0.739122	Xenobiotics	Xanthine Metabolism
theophylline	-0.135016	0.284795	0.554272	Xenobiotics	Xanthine Metabolism
1-methylxanthine	-0.152064	0.108595	0.318851	Xenobiotics	Xanthine Metabolism
1-methylurate	-0.160919	0.0232952	0.14049	Xenobiotics	Xanthine Metabolism
1,3-dimethylurate	-0.192662	0.0450193	0.200606	Xenobiotics	Xanthine Metabolism
hydroxybupropion	0	0		Xenobiotics	Drug - Psychoactive
milrinone*	0	0		Xenobiotics	Drug - Cardiovascular
penicillin G	0	0		Xenobiotics	Drug - Antibiotic
Note: Subanalysis results presented following mixed effects modeling of each of the 983 individual metabolites in a responder cohort of patients who received high dose vitamin D3 intervention and had an increase in 25(OH)D ≥ 7.5 ng/ml from day 0 to day 3. In day 0, 3 and 7 repeated measures data we determined correlations between individual metabolites over time relative to sex (as the exposure) …
