# Supplementary material for: Sex-Specific Catabolic Metabolism Alterations in the Critically Ill following High Dose Vitamin D
Source: Metabolites. 2022 Feb 25;12(3):207. doi: 10.3390/metabo12030207 (PMC8953844; doi:10.3390/metabo12030207)
Supplement: Supplementary file 1 [file metabolites-12-00207-s001.zip › Table S7.xlsx]

## Sheet: Significant at FCR 0.10
Metabolite	Beta Coefficient	p-value	q-value	Super Pathway	Sub Pathway
2,3-dihydroxy-2-methylbutyrate	-0.221444	0.00617835	0.0591705	Amino Acid	BCAA Metabolism
2-hydroxy-3-methylvalerate	-0.165505	0.00471767	0.0485672	Amino Acid	BCAA Metabolism
3-hydroxy-2-ethylpropionate	-0.154365	0.0048468	0.0493768	Amino Acid	BCAA Metabolism
3-hydroxyisobutyrate	-0.153204	0.00307971	0.0449546	Amino Acid	BCAA Metabolism
beta-hydroxyisovalerate	-0.202631	0.000340664	0.0104115	Amino Acid	BCAA Metabolism
isovalerate (C5)	-0.18462	0.00409547	0.0465741	Amino Acid	BCAA Metabolism
N-acetylleucine	-0.141507	0.0115057	0.0922339	Amino Acid	BCAA Metabolism
2-methylbutyroylcarnitine (C5)	-0.320564	1.90679e-05	0.00155404	Amino Acid	Short-chain Acylcarnitine
2-methylmalonylcarnitine (C4-DC)	-0.283854	0.000198362	0.00692848	Lipid	Short-chain Acylcarnitine
3-methyladipoylcarnitine (C7-DC)	-0.221182	0.0042405	0.0471274	Lipid	Short-chain Acylcarnitine
glutaroylcarnitine (C5)	-0.271419	7.7255e-05	0.00400705	Amino Acid	Short-chain Acylcarnitine
isovalerylcarnitine (C5)	-0.226283	0.00154987	0.0280698	Amino Acid	Short-chain Acylcarnitine
malonylcarnitine (C3-DC)	-0.160201	0.00973353	0.0845883	Lipid	Short-chain Acylcarnitine
propionylcarnitine (C3)	-0.201816	0.00399189	0.046477	Lipid	Short-chain Acylcarnitine
succinylcarnitine (C4-DC)	-0.257288	5.63983e-05	0.00338189	Energy	Short-chain Acylcarnitine
tiglyl carnitine (C5)	-0.354022	8.60398e-07	0.000168294	Amino Acid	Short-chain Acylcarnitine
sphingomyelin (d17:1/14:0, d16:1/15:0)*	0.277286	4.12823e-05	0.0026916	Lipid	Sphingomyelins
sphingomyelin (d17:1/16:0, d18:1/15:0, d16:1/17:0)*	0.180865	0.00018507	0.00670365	Lipid	Sphingomyelins
sphingomyelin (d17:2/16:0, d18:2/15:0)*	0.27201	1.71289e-05	0.00152292	Lipid	Sphingomyelins
sphingomyelin (d18:1/14:0, d16:1/16:0)*	0.119737	0.0103116	0.0852979	Lipid	Sphingomyelins
sphingomyelin (d18:1/17:0, d17:1/18:0, d19:1/16:0)	0.175435	0.000330726	0.0104115	Lipid	Sphingomyelins
sphingomyelin (d18:1/18:1, d18:2/18:0)	0.148262	0.00367799	0.046167	Lipid	Sphingomyelins
sphingomyelin (d18:1/19:0, d19:1/18:0)*	0.204956	0.000428141	0.0123153	Lipid	Sphingomyelins
sphingomyelin (d18:1/21:0, d17:1/22:0, d16:1/23:0)*	0.193523	0.00286456	0.0424475	Lipid	Sphingomyelins
sphingomyelin (d18:2/14:0, d18:1/14:1)*	0.240849	7.78465e-05	0.00400705	Lipid	Sphingomyelins
sphingomyelin (d18:2/18:1)*	0.180333	0.000560506	0.0141985	Lipid	Sphingomyelins
sphingomyelin (d18:2/21:0, d16:2/23:0)*	0.201676	0.000566198	0.0141985	Lipid	Sphingomyelins
sphingomyelin (d18:2/23:0, d18:1/23:1, d17:1/24:1)*	0.169141	0.00391806	0.046167	Lipid	Sphingomyelins
sphingomyelin (d18:2/23:1)*	0.151039	0.00334882	0.0456848	Lipid	Sphingomyelins
hexadecasphingosine (d16:1)*	0.183513	0.00216741	0.0349429	Lipid	Sphingosines
N-acetylalanine	-0.126103	0.00713213	0.065189	Amino Acid	Alanine and Aspartate Metabolism
N-acetylglucosaminylasparagine	-0.187457	0.00623165	0.0591705	Carbohydrate	Aminosugar Metabolism
N-acetylneuraminate	-0.141038	0.0112439	0.0908808	Carbohydrate	Aminosugar Metabolism
5alpha-androstan-3alpha,17beta-diol disulfate	-0.470772	5.87223e-08	1.43576e-05	Lipid	Androgenic Steroids
5alpha-androstan-3beta,17beta-diol disulfate	-0.376071	5.0747e-06	0.000551451	Lipid	Androgenic Steroids
5alpha-androstan-3beta,17alpha-diol disulfate	-0.417587	3.75304e-05	0.00262176	Lipid	Androgenic Steroids
5alpha-androstan-3alpha,17beta-diol monosulfate (2)	-0.135904	0.00384629	0.046167	Lipid	Androgenic Steroids
deoxycarnitine	-0.209466	0.000113135	0.00481071	Lipid	Carnitine Metabolism
N-palmitoyl-heptadecasphingosine (d17:1/16:0)*	0.157932	0.000669171	0.0152198	Lipid	Ceramides
ceramide (d18:1/14:0, d16:1/16:0)*	0.122151	0.0108289	0.0882552	Lipid	Ceramides
ectoine	-0.359309	0.000140602	0.00550037	Xenobiotics	Chemical
creatinine	-0.270366	7.28162e-09	2.4055e-06	Amino Acid	Creatine Metabolism
3-carboxy-4-methyl-5-propyl-2-furanpropanoate (CMPF)	-0.290563	0.00266986	0.0421149	Lipid	Fatty Acid, Dicarboxylate
3-methyladipate	-0.198222	0.0099702	0.0852979	Lipid	Fatty Acid, Dicarboxylate
beta-guanidinopropanoate	-0.417786	5.77289e-06	0.000564588	Xenobiotics	Food Component/Plant
methyl indole-3-acetate	-0.331487	9.16316e-05	0.00438766	Xenobiotics	Food Component/Plant
2-keto-3-deoxy-gluconate	-0.152521	0.0045399	0.0482611	Xenobiotics	Food Component/Plant
pyroglutamine*	-0.47717	7.37882e-09	2.4055e-06	Amino Acid	Glutamate Metabolism
N-acetyl-aspartyl-glutamate (NAAG)	-0.282282	0.000125609	0.00511855	Amino Acid	Glutamate Metabolism
alpha-ketoglutaramate*	-0.189136	0.000543623	0.0141985	Amino Acid	Glutamate Metabolism
glycerol	0.16292	0.00390429	0.046167	Lipid	Glycerolipid Metabolism
N-acetylthreonine	-0.164549	0.00209073	0.0346565	Amino Acid	Glycine, Serine and Threonine Metabolism
glycine	0.116922	0.0037063	0.046167	Amino Acid	Glycine, Serine and Threonine Metabolism
N-acetylserine	-0.154416	0.00502642	0.0502574	Amino Acid	Glycine, Serine and Threonine Metabolism
4-guanidinobutanoate	-0.318001	2.25615e-05	0.00169732	Amino Acid	Guanidino and Acetamido Metabolism
1-methylguanidine	-0.330169	0.000473942	0.0132433	Amino Acid	Guanidino and Acetamido Metabolism
guanidinosuccinate	-0.269267	0.0031429	0.0450996	Amino Acid	Guanidino and Acetamido Metabolism
N-acetylcarnosine	-0.41172	1.17718e-09	1.15128e-06	Amino Acid	Histidine Metabolism
imidazole lactate	-0.220384	0.000157601	0.00592823	Amino Acid	Histidine Metabolism
formiminoglutamate	-0.280696	0.000823307	0.0171318	Amino Acid	Histidine Metabolism
1-ribosyl-imidazoleacetate*	-0.181045	0.00373822	0.046167	Amino Acid	Histidine Metabolism
N-acetyl-1-methylhistidine*	-0.276221	0.00597943	0.0584788	Amino Acid	Histidine Metabolism
hydantoin-5-propionic acid	-0.232674	0.00751543	0.0680564	Amino Acid	Histidine Metabolism
N6,N6,N6-trimethyllysine	-0.266622	2.97225e-06	0.000363358	Amino Acid	Lysine Metabolism
1-stearoyl-GPE (18:0)	0.161721	0.000875777	0.017844	Lipid	Lysophospholipid
1-arachidonoyl-GPE (20:4n6)*	0.159647	0.00282749	0.0424475	Lipid	Lysophospholipid
1-linoleoyl-GPE (18:2)*	0.15574	0.00338923	0.0456848	Lipid	Lysophospholipid
1-palmitoyl-GPE (16:0)	0.138434	0.0034951	0.046167	Lipid	Lysophospholipid
1-oleoyl-GPG (18:1)*	-0.159821	0.0103748	0.0852979	Lipid	Lysophospholipid
1-linolenoyl-GPC (18:3)*	0.195704	0.00054789	0.0141985	Lipid	Lysophospholipid - Lysophosphatidylcholine
1-palmitoyl-GPC (16:0)	0.114588	0.00630826	0.0593219	Lipid	Lysophospholipid - Lysophosphatidylcholine
1-oleoyl-GPC (18:1)	0.101581	0.00671019	0.0619666	Lipid	Lysophospholipid - Lysophosphatidylcholine
1-palmitoleoyl-GPC* (16:1)*	0.139992	0.0103788	0.0852979	Lipid	Lysophospholipid - Lysophosphatidylcholine
cis-4-decenoylcarnitine (C10:1)	-0.209441	0.0018145	0.0313445	Lipid	Medium-chain Acylcarnitine
decanoylcarnitine (C10)	-0.204455	0.00217946	0.0349429	Lipid	Medium-chain Acylcarnitine
octanoylcarnitine (C8)	-0.203658	0.00371547	0.046167	Lipid	Medium-chain Acylcarnitine
lanthionine	-0.249986	0.000398754	0.0118176	Amino Acid	Methionine, Cysteine, SAM and Taurine Metabolism
5-methylthioribose	-0.246713	0.000662288	0.0152198	Amino Acid	Methionine, Cysteine, SAM and Taurine Metabolism
S-adenosylhomocysteine (SAH)	-0.210556	0.000788726	0.0171151	Amino Acid	Methionine, Cysteine, SAM and Taurine Metabolism
cysteine	-0.133779	0.0097735	0.0845883	Amino Acid	Methionine, Cysteine, SAM and Taurine Metabolism
sedoheptulose	-0.178642	0.0103374	0.0852979	Carbohydrate	Pentose Metabolism
N-acetylphenylalanine	-0.228219	0.00332409	0.0456848	Amino Acid	Phenylalanine Metabolism
1-myristoyl-2-arachidonoyl-GPC (14:0/20:4)*	0.19902	0.00503602	0.0502574	Lipid	Phosphatidylcholine
1-palmitoleoyl-2-linolenoyl-GPC (16:1/18:3)*	0.19686	0.00381243	0.046167	Lipid	Phosphatidylcholine (PC)
1-(1-enyl-palmitoyl)-2-palmitoyl-GPC (P-16:0/16:0)*	0.0020863	0.00414329	0.0465763	Lipid	Plasmalogen
1-(1-enyl-stearoyl)-2-linoleoyl-GPE (P-18:0/18:2)*	0.1439	0.0100782	0.0852979	Lipid	Plasmalogen
(N(1) + N(8))-acetylspermidine	-0.220579	0.000327058	0.0104115	Amino Acid	Polyamine Metabolism
5-methylthioadenosine (MTA)	-0.144052	0.00893436	0.0794346	Amino Acid	Polyamine Metabolism
acisoga	-0.18058	0.00955096	0.0841517	Amino Acid	Polyamine Metabolism
pregnen-diol disulfate*	-0.255163	0.000610347	0.014923	Lipid	Pregnenolone Steroids
glycochenodeoxycholate glucuronide (1)	-0.424374	1.87488e-06	0.000261948	Lipid	Primary Bile Acid Metabolism
glycochenodeoxycholate sulfate	-0.391238	9.50773e-05	0.00438766	Lipid	Primary Bile Acid Metabolism
N6-carbamoylthreonyladenosine	-0.214576	0.0006287	0.0149968	Nucleotide	Purine Metabolism
N1-methylinosine	-0.229573	0.000708883	0.0157565	Nucleotide	Purine Metabolism
xanthosine	-0.222158	0.00102626	0.0200737	Nucleotide	Purine Metabolism
allantoin	-0.146408	0.001337	0.0248586	Nucleotide	Purine Metabolism
N2,N2-dimethylguanosine	-0.202032	0.00448485	0.0482611	Nucleotide	Purine Metabolism
adenosine	-0.182315	0.00804963	0.0722251	Nucleotide	Purine Metabolism
2'-O-methylcytidine	-0.146827	0.00198531	0.0334764	Nucleotide	Pyrimidine Metabolism
3-methylcytidine	-0.181146	0.00341001	0.0456848	Nucleotide	Pyrimidine Metabolism
orotidine	-0.406148	0.00433628	0.0476503	Nucleotide	Pyrimidine Metabolism
glycocholenate sulfate*	-0.339471	1.57409e-06	0.000256577	Lipid	Secondary Bile Acid Metabolism
taurocholenate sulfate*	-0.35586	9.86999e-05	0.00438766	Lipid	Secondary Bile Acid Metabolism
glycodeoxycholate sulfate	-0.294841	0.00271695	0.0421774	Lipid	Secondary Bile Acid Metabolism
glycolithocholate sulfate*	-0.290712	0.00359349	0.046167	Lipid	Secondary Bile Acid Metabolism
3beta-hydroxy-5-cholestenoate	-0.174257	0.00405402	0.0465741	Lipid	Sterol
2-methylcitrate/homocitrate	-0.271572	0.000805003	0.0171151	Energy	TCA Cycle
picolinate	-0.277815	0.00109927	0.0210802	Amino Acid	Tryptophan Metabolism
indolelactate	-0.186054	0.00134714	0.0248586	Amino Acid	Tryptophan Metabolism
N-acetylkynurenine (2)	-0.299446	0.00164716	0.0292896	Amino Acid	Tryptophan Metabolism
N-formylanthranilic acid	-0.199456	0.00318188	0.0450996	Amino Acid	Tryptophan Metabolism
indoleacetate	-0.19473	0.00452653	0.0482611	Amino Acid	Tryptophan Metabolism
kynurenate	-0.262352	0.00539609	0.0533068	Amino Acid	Tryptophan Metabolism
N-acetyltyrosine	-0.266577	0.000262938	0.00886736	Amino Acid	Tyrosine Metabolism
3-(4-hydroxyphenyl)lactate (HPLA)	-0.182966	0.00277506	0.0424064	Amino Acid	Tyrosine Metabolism
2-hydroxyphenylacetate	-0.18678	0.00612116	0.0591705	Amino Acid	Tyrosine Metabolism
homovanillate sulfate	-0.244353	0.00671621	0.0619666	Amino Acid	Tyrosine Metabolism
argininate*	-0.281869	5.87854e-05	0.00338189	Amino Acid	Urea cycle; Arginine and Proline Metabolism
urea	-0.197451	0.000925804	0.0184783	Amino Acid	Urea cycle; Arginine and Proline Metabolism
2-oxoarginine*	-0.194124	0.00182683	0.0313445	Amino Acid	Urea cycle; Arginine and Proline Metabolism
N-acetylcitrulline	-0.255585	0.00469812	0.0485672	Amino Acid	Urea cycle; Arginine and Proline Metabolism
pyridoxate	-0.319054	0.00459227	0.0482929	Cofactors and Vitamins	Vitamin B6 Metabolism
Note: Signficant subanalysis results presented following mixed effects modeling of each of the 983 individual metabolites in a responder cohort of patients who received high dose vitamin D3 intervention and had an increase in 25(OH)D ≥ 7.5 ng/ml from day 0 to day 3. In day 0, 3 and 7 repeated measures data we determined correlations between individual metabolites over time relative to sex (as the…

## Sheet: All Data
Metabolite	Beta Coefficient	p-value	q-value	Super Pathway	Sub Pathway
2,3-dihydroxy-2-methylbutyrate	-0.221444	0.00617835	0.0591705	Amino Acid	BCAA Metabolism
2-hydroxy-3-methylvalerate	-0.165505	0.00471767	0.0485672	Amino Acid	BCAA Metabolism
3-hydroxy-2-ethylpropionate	-0.154365	0.0048468	0.0493768	Amino Acid	BCAA Metabolism
3-hydroxyisobutyrate	-0.153204	0.00307971	0.0449546	Amino Acid	BCAA Metabolism
beta-hydroxyisovalerate	-0.202631	0.000340664	0.0104115	Amino Acid	BCAA Metabolism
isovalerate (C5)	-0.18462	0.00409547	0.0465741	Amino Acid	BCAA Metabolism
N-acetylleucine	-0.141507	0.0115057	0.0922339	Amino Acid	BCAA Metabolism
2-methylbutyroylcarnitine (C5)	-0.320564	1.90679e-05	0.00155404	Amino Acid	Short-chain Acylcarnitine
2-methylmalonylcarnitine (C4-DC)	-0.283854	0.000198362	0.00692848	Lipid	Short-chain Acylcarnitine
3-methyladipoylcarnitine (C7-DC)	-0.221182	0.0042405	0.0471274	Lipid	Short-chain Acylcarnitine
glutaroylcarnitine (C5)	-0.271419	7.7255e-05	0.00400705	Amino Acid	Short-chain Acylcarnitine
isovalerylcarnitine (C5)	-0.226283	0.00154987	0.0280698	Amino Acid	Short-chain Acylcarnitine
malonylcarnitine (C3-DC)	-0.160201	0.00973353	0.0845883	Lipid	Short-chain Acylcarnitine
propionylcarnitine (C3)	-0.201816	0.00399189	0.046477	Lipid	Short-chain Acylcarnitine
succinylcarnitine (C4-DC)	-0.257288	5.63983e-05	0.00338189	Energy	Short-chain Acylcarnitine
tiglyl carnitine (C5)	-0.354022	8.60398e-07	0.000168294	Amino Acid	Short-chain Acylcarnitine
sphingomyelin (d17:1/14:0, d16:1/15:0)*	0.277286	4.12823e-05	0.0026916	Lipid	Sphingomyelins
sphingomyelin (d17:1/16:0, d18:1/15:0, d16:1/17:0)*	0.180865	0.00018507	0.00670365	Lipid	Sphingomyelins
sphingomyelin (d17:2/16:0, d18:2/15:0)*	0.27201	1.71289e-05	0.00152292	Lipid	Sphingomyelins
sphingomyelin (d18:1/14:0, d16:1/16:0)*	0.119737	0.0103116	0.0852979	Lipid	Sphingomyelins
sphingomyelin (d18:1/17:0, d17:1/18:0, d19:1/16:0)	0.175435	0.000330726	0.0104115	Lipid	Sphingomyelins
sphingomyelin (d18:1/18:1, d18:2/18:0)	0.148262	0.00367799	0.046167	Lipid	Sphingomyelins
sphingomyelin (d18:1/19:0, d19:1/18:0)*	0.204956	0.000428141	0.0123153	Lipid	Sphingomyelins
sphingomyelin (d18:1/21:0, d17:1/22:0, d16:1/23:0)*	0.193523	0.00286456	0.0424475	Lipid	Sphingomyelins
sphingomyelin (d18:2/14:0, d18:1/14:1)*	0.240849	7.78465e-05	0.00400705	Lipid	Sphingomyelins
sphingomyelin (d18:2/18:1)*	0.180333	0.000560506	0.0141985	Lipid	Sphingomyelins
sphingomyelin (d18:2/21:0, d16:2/23:0)*	0.201676	0.000566198	0.0141985	Lipid	Sphingomyelins
sphingomyelin (d18:2/23:0, d18:1/23:1, d17:1/24:1)*	0.169141	0.00391806	0.046167	Lipid	Sphingomyelins
sphingomyelin (d18:2/23:1)*	0.151039	0.00334882	0.0456848	Lipid	Sphingomyelins
N-acetylalanine	-0.126103	0.00713213	0.065189	Amino Acid	Alanine and Aspartate Metabolism								0
N-acetylglucosaminylasparagine	-0.187457	0.00623165	0.0591705	Carbohydrate	Aminosugar Metabolism								0
N-acetylneuraminate	-0.141038	0.0112439	0.0908808	Carbohydrate	Aminosugar Metabolism								0
5alpha-androstan-3alpha,17beta-diol disulfate	-0.470772	5.87223e-08	1.43576e-05	Lipid	Androgenic Steroids								0
5alpha-androstan-3beta,17beta-diol disulfate	-0.376071	5.0747e-06	0.000551451	Lipid	Androgenic Steroids								0
5alpha-androstan-3beta,17alpha-diol disulfate	-0.417587	3.75304e-05	0.00262176	Lipid	Androgenic Steroids								0
5alpha-androstan-3alpha,17beta-diol monosulfate (2)	-0.135904	0.00384629	0.046167	Lipid	Androgenic Steroids								0
deoxycarnitine	-0.209466	0.000113135	0.00481071	Lipid	Carnitine Metabolism								0
N-palmitoyl-heptadecasphingosine (d17:1/16:0)*	0.157932	0.000669171	0.0152198	Lipid	Ceramides								0
ceramide (d18:1/14:0, d16:1/16:0)*	0.122151	0.0108289	0.0882552	Lipid	Ceramides								0
ectoine	-0.359309	0.000140602	0.00550037	Xenobiotics	Chemical								0
creatinine	-0.270366	7.28162e-09	2.4055e-06	Amino Acid	Creatine Metabolism								0
3-carboxy-4-methyl-5-propyl-2-furanpropanoate (CMPF)	-0.290563	0.00266986	0.0421149	Lipid	Fatty Acid, Dicarboxylate								0
3-methyladipate	-0.198222	0.0099702	0.0852979	Lipid	Fatty Acid, Dicarboxylate								0
beta-guanidinopropanoate	-0.417786	5.77289e-06	0.000564588	Xenobiotics	Food Component/Plant								0
methyl indole-3-acetate	-0.331487	9.16316e-05	0.00438766	Xenobiotics	Food Component/Plant								0
2-keto-3-deoxy-gluconate	-0.152521	0.0045399	0.0482611	Xenobiotics	Food Component/Plant								0
pyroglutamine*	-0.47717	7.37882e-09	2.4055e-06	Amino Acid	Glutamate Metabolism								0
N-acetyl-aspartyl-glutamate (NAAG)	-0.282282	0.000125609	0.00511855	Amino Acid	Glutamate Metabolism								0
alpha-ketoglutaramate*	-0.189136	0.000543623	0.0141985	Amino Acid	Glutamate Metabolism								0
glycerol	0.16292	0.00390429	0.046167	Lipid	Glycerolipid Metabolism								0
N-acetylthreonine	-0.164549	0.00209073	0.0346565	Amino Acid	Glycine, Serine and Threonine Metabolism								0
glycine	0.116922	0.0037063	0.046167	Amino Acid	Glycine, Serine and Threonine Metabolism								0
N-acetylserine	-0.154416	0.00502642	0.0502574	Amino Acid	Glycine, Serine and Threonine Metabolism								0
4-guanidinobutanoate	-0.318001	2.25615e-05	0.00169732	Amino Acid	Guanidino and Acetamido Metabolism								0
1-methylguanidine	-0.330169	0.000473942	0.0132433	Amino Acid	Guanidino and Acetamido Metabolism								0
guanidinosuccinate	-0.269267	0.0031429	0.0450996	Amino Acid	Guanidino and Acetamido Metabolism								0
N-acetylcarnosine	-0.41172	1.17718e-09	1.15128e-06	Amino Acid	Histidine Metabolism								0
imidazole lactate	-0.220384	0.000157601	0.00592823	Amino Acid	Histidine Metabolism								0
formiminoglutamate	-0.280696	0.000823307	0.0171318	Amino Acid	Histidine Metabolism								0
1-ribosyl-imidazoleacetate*	-0.181045	0.00373822	0.046167	Amino Acid	Histidine Metabolism								0
N-acetyl-1-methylhistidine*	-0.276221	0.00597943	0.0584788	Amino Acid	Histidine Metabolism								0
hydantoin-5-propionic acid	-0.232674	0.00751543	0.0680564	Amino Acid	Histidine Metabolism								0
N6,N6,N6-trimethyllysine	-0.266622	2.97225e-06	0.000363358	Amino Acid	Lysine Metabolism								0
1-stearoyl-GPE (18:0)	0.161721	0.000875777	0.017844	Lipid	Lysophospholipid								0
1-arachidonoyl-GPE (20:4n6)*	0.159647	0.00282749	0.0424475	Lipid	Lysophospholipid								0
1-linoleoyl-GPE (18:2)*	0.15574	0.00338923	0.0456848	Lipid	Lysophospholipid								0
1-palmitoyl-GPE (16:0)	0.138434	0.0034951	0.046167	Lipid	Lysophospholipid								0
1-oleoyl-GPG (18:1)*	-0.159821	0.0103748	0.0852979	Lipid	Lysophospholipid								0
1-linolenoyl-GPC (18:3)*	0.195704	0.00054789	0.0141985	Lipid	Lysophospholipid - Lysophosphatidylcholine								0
1-palmitoyl-GPC (16:0)	0.114588	0.00630826	0.0593219	Lipid	Lysophospholipid - Lysophosphatidylcholine								0
1-oleoyl-GPC (18:1)	0.101581	0.00671019	0.0619666	Lipid	Lysophospholipid - Lysophosphatidylcholine								0
1-palmitoleoyl-GPC* (16:1)*	0.139992	0.0103788	0.0852979	Lipid	Lysophospholipid - Lysophosphatidylcholine								0
cis-4-decenoylcarnitine (C10:1)	-0.209441	0.0018145	0.0313445	Lipid	Medium-chain Acylcarnitine								0
decanoylcarnitine (C10)	-0.204455	0.00217946	0.0349429	Lipid	Medium-chain Acylcarnitine								0
octanoylcarnitine (C8)	-0.203658	0.00371547	0.046167	Lipid	Medium-chain Acylcarnitine								0
lanthionine	-0.249986	0.000398754	0.0118176	Amino Acid	Methionine, Cysteine, SAM and Taurine Metabolism								0
5-methylthioribose	-0.246713	0.000662288	0.0152198	Amino Acid	Methionine, Cysteine, SAM and Taurine Metabolism								0
S-adenosylhomocysteine (SAH)	-0.210556	0.000788726	0.0171151	Amino Acid	Methionine, Cysteine, SAM and Taurine Metabolism								0
cysteine	-0.133779	0.0097735	0.0845883	Amino Acid	Methionine, Cysteine, SAM and Taurine Metabolism								0
sedoheptulose	-0.178642	0.0103374	0.0852979	Carbohydrate	Pentose Metabolism								0
N-acetylphenylalanine	-0.228219	0.00332409	0.0456848	Amino Acid	Phenylalanine Metabolism								0
1-myristoyl-2-arachidonoyl-GPC (14:0/20:4)*	0.19902	0.00503602	0.0502574	Lipid	Phosphatidylcholine								0
1-palmitoleoyl-2-linolenoyl-GPC (16:1/18:3)*	0.19686	0.00381243	0.046167	Lipid	Phosphatidylcholine (PC)								0
1-(1-enyl-palmitoyl)-2-palmitoyl-GPC (P-16:0/16:0)*	0.0020863	0.00414329	0.0465763	Lipid	Plasmalogen								0
1-(1-enyl-stearoyl)-2-linoleoyl-GPE (P-18:0/18:2)*	0.1439	0.0100782	0.0852979	Lipid	Plasmalogen								0
(N(1) + N(8))-acetylspermidine	-0.220579	0.000327058	0.0104115	Amino Acid	Polyamine Metabolism								0
5-methylthioadenosine (MTA)	-0.144052	0.00893436	0.0794346	Amino Acid	Polyamine Metabolism								0
acisoga	-0.18058	0.00955096	0.0841517	Amino Acid	Polyamine Metabolism								0
pregnen-diol disulfate*	-0.255163	0.000610347	0.014923	Lipid	Pregnenolone Steroids								0
glycochenodeoxycholate glucuronide (1)	-0.424374	1.87488e-06	0.000261948	Lipid	Primary Bile Acid Metabolism								0
glycochenodeoxycholate sulfate	-0.391238	9.50773e-05	0.00438766	Lipid	Primary Bile Acid Metabolism								0
N6-carbamoylthreonyladenosine	-0.214576	0.0006287	0.0149968	Nucleotide	Purine Metabolism								0
N1-methylinosine	-0.229573	0.000708883	0.0157565	Nucleotide	Purine Metabolism								0
xanthosine	-0.222158	0.00102626	0.0200737	Nucleotide	Purine Metabolism								0
allantoin	-0.146408	0.001337	0.0248586	Nucleotide	Purine Metabolism								0
N2,N2-dimethylguanosine	-0.202032	0.00448485	0.0482611	Nucleotide	Purine Metabolism								0
adenosine	-0.182315	0.00804963	0.0722251	Nucleotide	Purine Metabolism								0
2'-O-methylcytidine	-0.146827	0.00198531	0.0334764	Nucleotide	Pyrimidine Metabolism								0
3-methylcytidine	-0.181146	0.00341001	0.0456848	Nucleotide	Pyrimidine Metabolism								0
orotidine	-0.406148	0.00433628	0.0476503	Nucleotide	Pyrimidine Metabolism								0
glycocholenate sulfate*	-0.339471	1.57409e-06	0.000256577	Lipid	Secondary Bile Acid Metabolism								0
taurocholenate sulfate*	-0.35586	9.86999e-05	0.00438766	Lipid	Secondary Bile Acid Metabolism								0
glycodeoxycholate sulfate	-0.294841	0.00271695	0.0421774	Lipid	Secondary Bile Acid Metabolism								0
glycolithocholate sulfate*	-0.290712	0.00359349	0.046167	Lipid	Secondary Bile Acid Metabolism								0
hexadecasphingosine (d16:1)*	0.183513	0.00216741	0.0349429	Lipid	Sphingosines								0
3beta-hydroxy-5-cholestenoate	-0.174257	0.00405402	0.0465741	Lipid	Sterol								0
2-methylcitrate/homocitrate	-0.271572	0.000805003	0.0171151	Energy	TCA Cycle								0
picolinate	-0.277815	0.00109927	0.0210802	Amino Acid	Tryptophan Metabolism								0
indolelactate	-0.186054	0.00134714	0.0248586	Amino Acid	Tryptophan Metabolism								0
N-acetylkynurenine (2)	-0.299446	0.00164716	0.0292896	Amino Acid	Tryptophan Metabolism								0
N-formylanthranilic acid	-0.199456	0.00318188	0.0450996	Amino Acid	Tryptophan Metabolism								0
indoleacetate	-0.19473	0.00452653	0.0482611	Amino Acid	Tryptophan Metabolism								0
kynurenate	-0.262352	0.00539609	0.0533068	Amino Acid	Tryptophan Metabolism								0
N-acetyltyrosine	-0.266577	0.000262938	0.00886736	Amino Acid	Tyrosine Metabolism								0
3-(4-hydroxyphenyl)lactate (HPLA)	-0.182966	0.00277506	0.0424064	Amino Acid	Tyrosine Metabolism								0
2-hydroxyphenylacetate	-0.18678	0.00612116	0.0591705	Amino Acid	Tyrosine Metabolism								0
homovanillate sulfate	-0.244353	0.00671621	0.0619666	Amino Acid	Tyrosine Metabolism								0
argininate*	-0.281869	5.87854e-05	0.00338189	Amino Acid	Urea cycle; Arginine and Proline Metabolism								0
urea	-0.197451	0.000925804	0.0184783	Amino Acid	Urea cycle; Arginine and Proline Metabolism								0
2-oxoarginine*	-0.194124	0.00182683	0.0313445	Amino Acid	Urea cycle; Arginine and Proline Metabolism								0
N-acetylcitrulline	-0.255585	0.00469812	0.0485672	Amino Acid	Urea cycle; Arginine and Proline Metabolism								0
pyridoxate	-0.319054	0.00459227	0.0482929	Cofactors and Vitamins	Vitamin B6 Metabolism								0
phenylacetylmethionine	-0.243566	0.0228576	0.137145	Peptide	Acetylated Peptides								0
phenylacetylglutamate	-0.169849	0.0693454	0.243956	Peptide	Acetylated Peptides								0
phenylacetylhistidine	-0.123983	0.0940025	0.292785	Peptide	Acetylated Peptides								0
phenylacetylglutamine	-0.114719	0.126133	0.337043	Peptide	Acetylated Peptides								0
4-hydroxyphenylacetylglutamine	-0.0690832	0.50968	0.732079	Peptide	Acetylated Peptides								0
phenylacetylcarnitine	-0.0243306	0.785957	0.879481	Peptide	Acetylated Peptides								0
N6-carboxymethyllysine	-0.121507	0.0786022	0.266339	Carbohydrate	Advanced Glycation End-product								0
hydroxyasparagine	-0.119648	0.036007	0.169223	Amino Acid	Alanine and Aspartate Metabolism								0
aspartate	0.13658	0.0409907	0.181118	Amino Acid	Alanine and Aspartate Metabolism								0
N-acetylaspartate (NAA)	0.0475586	0.366872	0.630582	Amino Acid	Alanine and Aspartate Metabolism								0
asparagine	-0.0338016	0.400884	0.6454	Amino Acid	Alanine and Aspartate Metabolism								0
alanine	0.0192607	0.666166	0.81603	Amino Acid	Alanine and Aspartate Metabolism								0
erythronate*	-0.138087	0.0169098	0.117925	Carbohydrate	Aminosugar Metabolism								0
glucuronate	-0.177513	0.0390201	0.176559	Carbohydrate	Aminosugar Metabolism								0
N-acetylglucosamine/N-acetylgalactosamine	-0.0719075	0.10171	0.307014	Carbohydrate	Aminosugar Metabolism								0
androstenediol (3beta,17beta) disulfate (1)	-0.198704	0.0158244	0.117714	Lipid	Androgenic Steroids								0
androstenediol (3beta,17beta) monosulfate (2)	0.204127	0.017122	0.117925	Lipid	Androgenic Steroids								0
androsterone glucuronide	-0.21037	0.0309911	0.156471	Lipid	Androgenic Steroids								0
androstenediol (3beta,17beta) disulfate (2)	-0.126559	0.0638939	0.234038	Lipid	Androgenic Steroids								0
androstenediol (3alpha, 17alpha) monosulfate (3)	-0.16048	0.104947	0.311024	Lipid	Androgenic Steroids								0
androstenediol (3alpha, 17alpha) monosulfate (2)	0.102753	0.183909	0.420697	Lipid	Androgenic Steroids								0
11-ketoetiocholanolone glucuronide	-0.0927822	0.212929	0.459701	Lipid	Androgenic Steroids								0
5alpha-androstan-3beta,17beta-diol monosulfate (2)	-0.0963757	0.219064	0.468808	Lipid	Androgenic Steroids								0
5alpha-androstan-3alpha,17beta-diol monosulfate (1)	-0.106252	0.220452	0.470747	Lipid	Androgenic Steroids								0
androstenediol (3beta,17beta) monosulfate (1)	-0.0808197	0.399201	0.6454	Lipid	Androgenic Steroids								0
16a-hydroxy DHEA 3-sulfate	0.0671296	0.426541	0.668521	Lipid	Androgenic Steroids								0
androsterone sulfate	0.0846518	0.43696	0.678023	Lipid	Androgenic Steroids								0
etiocholanolone glucuronide	-0.0538876	0.510109	0.732079	Lipid	Androgenic Steroids								0
dehydroisoandrosterone sulfate (DHEA-S)	0.035592	0.699074	0.833784	Lipid	Androgenic Steroids								0
epiandrosterone sulfate	-0.0282457	0.801236	0.891477	Lipid	Androgenic Steroids								0
andro steroid monosulfate C19H28O6S (1)*	0.00994841	0.90649	0.94431	Lipid	Androgenic Steroids								0
gulonate*	-0.159679	0.042532	0.184054	Cofactors and Vitamins	Ascorbate and Aldarate Metabolism								0
oxalate (ethanedioate)	0.0432558	0.408003	0.651368	Cofactors and Vitamins	Ascorbate and Aldarate Metabolism								0
threonate	-0.000236758	0.996636	0.998678	Cofactors and Vitamins	Ascorbate and Aldarate Metabolism								0
N-methylpipecolate	-0.154678	0.059229	0.222792	Xenobiotics	Bacterial/Fungal								0
tartronate (hydroxymalonate)	0.0936176	0.0895871	0.285185	Xenobiotics	Bacterial/Fungal								0
1H-indole-7-acetic acid	-0.0805697	0.312064	0.575652	Xenobiotics	Bacterial/Fungal								0
N-acetylisoleucine	-0.12095	0.0160193	0.117796	Amino Acid	BCAA Metabolism								0
N-acetylvaline	-0.103266	0.0277357	0.148889	Amino Acid	BCAA Metabolism								0
alpha-hydroxyisocaproate	-0.111297	0.0373823	0.171643	Amino Acid	BCAA Metabolism								0
isoleucine	-0.0688064	0.0550063	0.213477	Amino Acid	BCAA Metabolism								0
alpha-hydroxyisovalerate	-0.108771	0.0737489	0.253423	Amino Acid	BCAA Metabolism								0
propionylglycine (C3)	0.10842	0.0844521	0.27705	Lipid	BCAA Metabolism								0
leucine	-0.0581578	0.118014	0.326961	Amino Acid	BCAA Metabolism								0
valine	-0.0487251	0.153585	0.382088	Amino Acid	BCAA Metabolism								0
4-methyl-2-oxopentanoate	-0.0685602	0.195307	0.437794	Amino Acid	BCAA Metabolism								0
isovalerylglycine	-0.090115	0.273365	0.53564	Amino Acid	BCAA Metabolism								0
methylmalonate (MMA)	-0.0777394	0.275579	0.536285	Lipid	BCAA Metabolism								0
3-methyl-2-oxovalerate	-0.0555553	0.296813	0.562166	Amino Acid	BCAA Metabolism								0
isobutyrylglycine (C4)	-0.0619596	0.394073	0.6454	Amino Acid	BCAA Metabolism								0
3-methylglutaconate	-0.0517519	0.467263	0.709601	Amino Acid	BCAA Metabolism								0
ethylmalonate	0.0311846	0.610021	0.797594	Amino Acid	BCAA Metabolism								0
methylsuccinate	-0.0220522	0.694703	0.833644	Amino Acid	BCAA Metabolism								0
3-methyl-2-oxobutyrate	-0.0135104	0.747417	0.856356	Amino Acid	BCAA Metabolism								0
4-methylguaiacol sulfate	-0.205873	0.02534	0.144927	Xenobiotics	Benzoate Metabolism								0
o-cresol sulfate	-0.112425	0.0558771	0.215149	Xenobiotics	Benzoate Metabolism								0
guaiacol sulfate	-0.174511	0.0891209	0.285185	Xenobiotics	Benzoate Metabolism								0
p-cresol sulfate	-0.151783	0.116406	0.325753	Xenobiotics	Benzoate Metabolism								0
4-vinylphenol sulfate	-0.140862	0.117829	0.326961	Xenobiotics	Benzoate Metabolism								0
3-methoxycatechol sulfate (1)	-0.104583	0.212062	0.459701	Xenobiotics	Benzoate Metabolism								0
2-hydroxyhippurate (salicylurate)	0.171257	0.22095	0.470782	Xenobiotics	Benzoate Metabolism								0
methyl-4-hydroxybenzoate sulfate	-0.11981	0.235451	0.489572	Xenobiotics	Benzoate Metabolism								0
hippurate	-0.114414	0.259017	0.520246	Xenobiotics	Benzoate Metabolism								0
4-hydroxyhippurate	-0.0923244	0.275884	0.536285	Xenobiotics	Benzoate Metabolism								0
propyl 4-hydroxybenzoate sulfate	-0.103855	0.306182	0.569289	Xenobiotics	Benzoate Metabolism								0
4-methylcatechol sulfate	-0.107508	0.315849	0.577384	Xenobiotics	Benzoate Metabolism								0
3-phenylpropionate (hydrocinnamate)	0.0770786	0.395602	0.6454	Xenobiotics	Benzoate Metabolism								0
3-(3-hydroxyphenyl)propionate sulfate	-0.0342524	0.419459	0.662398	Xenobiotics	Benzoate Metabolism								0
benzoate	0.0241496	0.525113	0.736816	Xenobiotics	Benzoate Metabolism								0
3-methoxycatechol sulfate (2)	-0.0314536	0.55394	0.76089	Xenobiotics	Benzoate Metabolism								0
4-acetylphenyl sulfate	-0.0404885	0.591531	0.789463	Xenobiotics	Benzoate Metabolism								0
4-ethylphenyl sulfate	-0.0599783	0.608865	0.797149	Xenobiotics	Benzoate Metabolism								0
3-hydroxyhippurate	0.0389815	0.663339	0.815007	Xenobiotics	Benzoate Metabolism								0
3-(3-hydroxyphenyl)propionate	0.0260477	0.706358	0.836341	Xenobiotics	Benzoate Metabolism								0
3-methyl catechol sulfate (1)	-0.0225671	0.816741	0.899518	Xenobiotics	Benzoate Metabolism								0
catechol sulfate	-0.0241301	0.819686	0.901746	Xenobiotics	Benzoate Metabolism								0
carnitine	-0.083046	0.108643	0.316667	Lipid	Carnitine Metabolism								0
N-palmitoyl-sphingadienine (d18:2/16:0)*	0.0996096	0.0152895	0.115146	Lipid	Ceramides								0
ceramide (d18:1/17:0, d17:1/18:0)*	0.125363	0.0162523	0.117925	Lipid	Ceramides								0
N-behenoyl-sphingadienine (d18:2/22:0)*	0.0956306	0.0711553	0.247651	Lipid	Ceramides								0
N-stearoyl-sphingadienine (d18:2/18:0)*	0.0963247	0.0938241	0.292785	Lipid	Ceramides								0
ceramide (d18:1/20:0, d16:1/22:0, d20:1/18:0)*	0.0605279	0.207565	0.456768	Lipid	Ceramides								0
N-stearoyl-sphingosine (d18:1/18:0)*	0.036757	0.48033	0.721601	Lipid	Ceramides								0
ceramide (d18:2/24:1, d18:1/24:2)*	0.0269511	0.546217	0.756658	Lipid	Ceramides								0
N-palmitoyl-sphingosine (d18:1/16:0)	0.0255956	0.57908	0.78332	Lipid	Ceramides								0
ceramide (d16:1/24:1, d18:1/22:1)*	0.0212671	0.652876	0.806203	Lipid	Ceramides								0
O-sulfo-L-tyrosine	-0.1424	0.0128312	0.101201	Xenobiotics	Chemical								0
sulfate*	-0.0941683	0.0254884	0.144928	Xenobiotics	Chemical								0
succinimide	-0.123658	0.0545426	0.213015	Xenobiotics	Chemical								0
3-acetylphenol sulfate	-0.0932141	0.116578	0.325753	Xenobiotics	Chemical								0
4-hydroxychlorothalonil	0.116089	0.134246	0.35199	Xenobiotics	Chemical								0
2-aminophenol sulfate	-0.124496	0.147071	0.374024	Xenobiotics	Chemical								0
6-hydroxyindole sulfate	-0.13383	0.153929	0.382088	Xenobiotics	Chemical								0
indoleacetylcarnitine*	-0.122143	0.16623	0.402408	Xenobiotics	Chemical								0
dimethyl sulfone	-0.10862	0.195619	0.437794	Xenobiotics	Chemical								0
perfluorooctanoate (PFOA)*	0.0924443	0.274392	0.53564	Xenobiotics	Chemical								0
ethyl glucuronide	-0.061098	0.289582	0.553147	Xenobiotics	Chemical								0
3-hydroxypyridine sulfate	-0.0904543	0.508375	0.732079	Xenobiotics	Chemical								0
perfluorooctanesulfonate (PFOS)	-0.0540348	0.518569	0.732079	Xenobiotics	Chemical								0
EDTA	0.0167681	0.584058	0.785707	Xenobiotics	Chemical								0
2-methoxyresorcinol sulfate	-0.0312057	0.585651	0.786482	Xenobiotics	Chemical								0
iminodiacetate (IDA)	0.0172567	0.748528	0.856356	Xenobiotics	Chemical								0
diglycerol	0.0208421	0.797357	0.8902	Xenobiotics	Chemical								0
diethanolamine	0.0162349	0.88673	0.938412	Xenobiotics	Chemical								0
thioproline	-0.00723619	0.887557	0.938412	Xenobiotics	Chemical								0
trizma acetate	-0.0140073	0.906151	0.94431	Xenobiotics	Chemical								0
1,2,3-benzenetriol sulfate (2)	-0.0090506	0.921503	0.949663	Xenobiotics	Chemical								0
cortisol 21-glucuronide	-0.159363	0.0357255	0.16879	Lipid	Corticosteroids								0
cortisone	0.0620642	0.321095	0.585879	Lipid	Corticosteroids								0
cortisol	-0.021833	0.699233	0.833784	Lipid	Corticosteroids								0
creatine	0.097998	0.101584	0.307014	Amino Acid	Creatine Metabolism								0
guanidinoacetate	-0.056354	0.381771	0.643745	Amino Acid	Creatine Metabolism								0
palmitoleoyl-arachidonoyl-glycerol (16:1/20:4) [2]*	0.172632	0.016391	0.117925	Lipid	Diacylglycerol								0
linoleoyl-arachidonoyl-glycerol (18:2/20:4) [2]*	0.138116	0.0280119	0.148889	Lipid	Diacylglycerol								0
stearoyl-arachidonoyl-glycerol (18:0/20:4) [1]*	0.123969	0.028457	0.149629	Lipid	Diacylglycerol								0
oleoyl-arachidonoyl-glycerol (18:1/20:4) [2]*	0.129133	0.0391751	0.176559	Lipid	Diacylglycerol								0
oleoyl-arachidonoyl-glycerol (18:1/20:4) [1]*	0.119451	0.0541012	0.213015	Lipid	Diacylglycerol								0
stearoyl-arachidonoyl-glycerol (18:0/20:4) [2]*	0.0937983	0.0950723	0.294243	Lipid	Diacylglycerol								0
linoleoyl-arachidonoyl-glycerol (18:2/20:4) [1]*	0.0997685	0.124299	0.334614	Lipid	Diacylglycerol								0
palmitoyl-arachidonoyl-glycerol (16:0/20:4) [2]*	0.0795379	0.226093	0.479652	Lipid	Diacylglycerol								0
linoleoyl-linolenoyl-glycerol (18:2/18:3) [2]*	0.0567087	0.357356	0.619042	Lipid	Diacylglycerol								0
diacylglycerol (16:1/18:2 [2], 16:0/18:3 [1])*	0.0481917	0.421564	0.663912	Lipid	Diacylglycerol								0
oleoyl-linolenoyl-glycerol (18:1/18:3) [2]*	0.0460249	0.462516	0.703708	Lipid	Diacylglycerol								0
oleoyl-linoleoyl-glycerol (18:1/18:2) [2]	0.036186	0.51387	0.732079	Lipid	Diacylglycerol								0
oleoyl-oleoyl-glycerol (18:1/18:1) [2]*	0.0380476	0.517454	0.732079	Lipid	Diacylglycerol								0
palmitoyl-oleoyl-glycerol (16:0/18:1) [2]*	0.0361932	0.547351	0.757155	Lipid	Diacylglycerol								0
diacylglycerol (14:0/18:1, 16:0/16:1) [1]*	0.041861	0.556389	0.762455	Lipid	Diacylglycerol								0
diacylglycerol (14:0/18:1, 16:0/16:1) [2]*	0.0416183	0.556639	0.762455	Lipid	Diacylglycerol								0
oleoyl-oleoyl-glycerol (18:1/18:1) [1]*	0.0319525	0.578106	0.783086	Lipid	Diacylglycerol								0
palmitoyl-arachidonoyl-glycerol (16:0/20:4) [1]*	0.0355094	0.6154	0.801392	Lipid	Diacylglycerol								0
palmitoyl-linoleoyl-glycerol (16:0/18:2) [2]*	0.0223023	0.690358	0.830467	Lipid	Diacylglycerol								0
palmitoleoyl-linoleoyl-glycerol (16:1/18:2) [1]*	0.0231554	0.703979	0.835548	Lipid	Diacylglycerol								0
oleoyl-linoleoyl-glycerol (18:1/18:2) [1]	0.020447	0.711158	0.83722	Lipid	Diacylglycerol								0
palmitoyl-palmitoyl-glycerol (16:0/16:0) [2]*	0.0247775	0.735592	0.854167	Lipid	Diacylglycerol								0
palmitoyl-oleoyl-glycerol (16:0/18:1) [1]*	0.0198211	0.743678	0.856356	Lipid	Diacylglycerol								0
linoleoyl-linoleoyl-glycerol (18:2/18:2) [1]*	0.0163319	0.796685	0.8902	Lipid	Diacylglycerol								0
palmitoyl-linoleoyl-glycerol (16:0/18:2) [1]*	-0.00815371	0.895269	0.943506	Lipid	Diacylglycerol								0
N-stearoyl-sphinganine (d18:0/18:0)*	0.108441	0.0668402	0.238204	Lipid	Dihydroceramides								0
N-palmitoyl-sphinganine (d18:0/16:0)	0.0670587	0.166874	0.402713	Lipid	Dihydroceramides								0
sphingomyelin (d18:0/20:0, d16:0/22:0)*	0.136995	0.0288424	0.150042	Lipid	Dihydrosphingomyelins								0
sphingomyelin (d18:0/18:0, d19:0/17:0)*	0.13319	0.0330532	0.163263	Lipid	Dihydrosphingomyelins								0
behenoyl dihydrosphingomyelin (d18:0/22:0)*	0.120804	0.0625475	0.23171	Lipid	Dihydrosphingomyelins								0
myristoyl dihydrosphingomyelin (d18:0/14:0)*	0.0973901	0.0699565	0.245224	Lipid	Dihydrosphingomyelins								0
palmitoyl dihydrosphingomyelin (d18:0/16:0)*	0.079468	0.0846978	0.27705	Lipid	Dihydrosphingomyelins								0
prolylglycine	-0.10855	0.092352	0.291643	Peptide	Dipeptide								0
glycylvaline	0.077189	0.114252	0.323846	Peptide	Dipeptide								0
histidylalanine	-0.0728052	0.151059	0.378565	Peptide	Dipeptide								0
isoleucylglycine	-0.0386925	0.518084	0.732079	Peptide	Dipeptide								0
valylglycine	-0.0269214	0.719386	0.840572	Peptide	Dipeptide								0
sucrose	-0.0830947	0.343983	0.612654	Carbohydrate	Disaccharides and Oligosaccharides								0
desmethylnaproxen	-0.0962595	0.133995	0.35199	Xenobiotics	Drug - Analgesics, Anesthetics								0
lidocaine	-0.124898	0.164161	0.400374	Xenobiotics	Drug - Analgesics, Anesthetics								0
3-(N-acetyl-L-cystein-S-yl) acetaminophen	-0.137343	0.176345	0.413721	Xenobiotics	Drug - Analgesics, Anesthetics								0
O-desmethyltramadol	0.0530164	0.209296	0.456768	Xenobiotics	Drug - Analgesics, Anesthetics								0
N-desmethyl tramadol	0.0540735	0.209477	0.456768	Xenobiotics	Drug - Analgesics, Anesthetics								0
2-hydroxyibuprofen	-0.0278158	0.249815	0.510061	Xenobiotics	Drug - Analgesics, Anesthetics								0
ibuprofen acyl glucuronide	-0.0278586	0.302826	0.566854	Xenobiotics	Drug - Analgesics, Anesthetics								0
4-acetamidophenol	0.0738747	0.307167	0.570036	Xenobiotics	Drug - Analgesics, Anesthetics								0
tramadol	0.0432533	0.344849	0.612654	Xenobiotics	Drug - Analgesics, Anesthetics								0
4-aminophenol sulfate (2)	-0.0321698	0.368764	0.631613	Xenobiotics	Drug - Analgesics, Anesthetics								0
2-methoxyacetaminophen sulfate*	-0.0698855	0.399684	0.6454	Xenobiotics	Drug - Analgesics, Anesthetics								0
ibuprofen	-0.0257593	0.459025	0.701921	Xenobiotics	Drug - Analgesics, Anesthetics								0
O-desmethyltramadol glucuronide	0.041728	0.474366	0.718971	Xenobiotics	Drug - Analgesics, Anesthetics								0
carboxyibuprofen	-0.0279801	0.495138	0.732079	Xenobiotics	Drug - Analgesics, Anesthetics								0
4-acetamidophenylglucuronide	-0.109325	0.496067	0.732079	Xenobiotics	Drug - Analgesics, Anesthetics								0
naproxen	0.0537203	0.514129	0.732079	Xenobiotics	Drug - Analgesics, Anesthetics								0
morphine	0.0236405	0.519927	0.732079	Xenobiotics	Drug - Analgesics, Anesthetics								0
desmethylnaproxen sulfate	0.0404427	0.521334	0.732565	Xenobiotics	Drug - Analgesics, Anesthetics								0
3-(cystein-S-yl)acetaminophen*	-0.0311257	0.59654	0.791766	Xenobiotics	Drug - Analgesics, Anesthetics								0
diclofenac	-0.0464535	0.597665	0.791766	Xenobiotics	Drug - Analgesics, Anesthetics								0
4-acetaminophen sulfate	-0.0860455	0.598538	0.791766	Xenobiotics	Drug - Analgesics, Anesthetics								0
N-ethylglycinexylidide	0.0551178	0.606665	0.79629	Xenobiotics	Drug - Analgesics, Anesthetics								0
salicyluric glucuronide*	0.0504198	0.611609	0.798603	Xenobiotics	Drug - Analgesics, Anesthetics								0
morphine-6-glucuronide	-0.021067	0.63284	0.801754	Xenobiotics	Drug - Analgesics, Anesthetics								0
2-hydroxyacetaminophen sulfate*	-0.0436445	0.673626	0.82248	Xenobiotics	Drug - Analgesics, Anesthetics								0
2-methoxyacetaminophen glucuronide*	-0.0120705	0.867258	0.927985	Xenobiotics	Drug - Analgesics, Anesthetics								0
morphine-3-glucuronide	0.00379592	0.955748	0.974684	Xenobiotics	Drug - Analgesics, Anesthetics								0
fluconazole	0.115675	0.0244383	0.142266	Xenobiotics	Drug - Antibiotic								0
clindamycin	0.0728034	0.0738501	0.253423	Xenobiotics	Drug - Antibiotic								0
linezolid	-0.0940423	0.115268	0.324877	Xenobiotics	Drug - Antibiotic								0
azithromycin	-0.0832453	0.17591	0.413721	Xenobiotics	Drug - Antibiotic								0
cefazolin	0.0659289	0.233047	0.488015	Xenobiotics	Drug - Antibiotic								0
moxifloxacin	-0.0580262	0.237186	0.490418	Xenobiotics	Drug - Antibiotic								0
doxycycline	0.055008	0.285232	0.549127	Xenobiotics	Drug - Antibiotic								0
metronidazole	-0.0549063	0.302062	0.566854	Xenobiotics	Drug - Antibiotic								0
ofloxacin	0.110629	0.336054	0.605268	Xenobiotics	Drug - Antibiotic								0
amoxicillin	-0.0433092	0.616258	0.801392	Xenobiotics	Drug - Antibiotic								0
ceftazidime	0.00933572	0.633164	0.801754	Xenobiotics	Drug - Antibiotic								0
ciprofloxacin	-0.0162498	0.73313	0.852652	Xenobiotics	Drug - Antibiotic								0
meropenem	0.0198189	0.823834	0.903262	Xenobiotics	Drug - Antibiotic								0
prednisolone	0.150139	0.0153058	0.115146	Xenobiotics	Drug - Antiinflammatory, Immunosuppressant								0
mycophenolic acid glucuronide	0.0228926	0.186874	0.423846	Xenobiotics	Drug - Antiinflammatory, Immunosuppressant								0
mycophenolic acid	0.0171037	0.208304	0.456768	Xenobiotics	Drug - Antiinflammatory, Immunosuppressant								0
lisinopril	-0.155568	0.0936858	0.292785	Xenobiotics	Drug - Cardiovascular								0
atenolol	0.0186568	0.158621	0.391347	Xenobiotics	Drug - Cardiovascular								0
milrinone*	0.00645263	0.206212	0.456598	Xenobiotics	Drug - Cardiovascular								0
metoprolol	0.0786528	0.245984	0.504345	Xenobiotics	Drug - Cardiovascular								0
hydrochlorothiazide	0.0564177	0.48281	0.724214	Xenobiotics	Drug - Cardiovascular								0
furosemide	-0.0736734	0.489006	0.729036	Xenobiotics	Drug - Cardiovascular								0
verapamil	0.0194659	0.497203	0.732079	Xenobiotics	Drug - Cardiovascular								0
alpha-hydroxymetoprolol	0.0356777	0.560311	0.765341	Xenobiotics	Drug - Cardiovascular								0
valsartan	-0.024504	0.661277	0.81452	Xenobiotics	Drug - Cardiovascular								0
metoprolol acid metabolite*	0.0469382	0.688976	0.829825	Xenobiotics	Drug - Cardiovascular								0
candesartan	-0.020444	0.764316	0.862169	Xenobiotics	Drug - Cardiovascular								0
omeprazole	-0.0770724	0.456599	0.701026	Xenobiotics	Drug - Gastrointestinal								0
ranitidine	0.0152888	0.62024	0.801392	Xenobiotics	Drug - Gastrointestinal								0
metoclopramide	-0.0405725	0.641788	0.802691	Xenobiotics	Drug - Gastrointestinal								0
pantoprazole	0.0473369	0.646153	0.802691	Xenobiotics	Drug - Gastrointestinal								0
famotidine	-0.0156972	0.805075	0.893594	Xenobiotics	Drug - Gastrointestinal								0
ondansetron	0.0071057	0.920857	0.949663	Xenobiotics	Drug - Gastrointestinal								0
oxypurinol	-0.230132	0.0178911	0.119473	Xenobiotics	Drug - Metabolic								0
metformin	0.273402	0.0665352	0.238204	Xenobiotics	Drug - Metabolic								0
allopurinol riboside	-0.115183	0.184712	0.421092	Xenobiotics	Drug - Metabolic								0
allopurinol	-0.0564383	0.206868	0.456698	Xenobiotics	Drug - Metabolic								0
p-hydroxyatorvastatin lactone	0.0334932	0.276368	0.536285	Xenobiotics	Drug - Metabolic								0
o-hydroxyatorvastatin lactone	0.0502855	0.357626	0.619042	Xenobiotics	Drug - Metabolic								0
atorvastatin lactone	0.0526208	0.362078	0.623438	Xenobiotics	Drug - Metabolic								0
atorvastatin (lipitor)	0.0485691	0.378118	0.639751	Xenobiotics	Drug - Metabolic								0
hydroxypioglitazone (M-IV)	-0.0160133	0.400327	0.6454	Xenobiotics	Drug - Metabolic								0
o-hydroxyatorvastatin	0.0241902	0.698508	0.833784	Xenobiotics	Drug - Metabolic								0
p-hydroxyatorvastatin	0.000741818	0.970418	0.983756	Xenobiotics	Drug - Metabolic								0
pyridostigmine	0.110052	0.0411985	0.181118	Xenobiotics	Drug - Neurological								0
lamotrigine	-0.0522529	0.347364	0.612654	Xenobiotics	Drug - Neurological								0
rocuronium	-0.0510878	0.383667	0.6454	Xenobiotics	Drug - Neurological								0
gabapentin	-0.060869	0.439741	0.680485	Xenobiotics	Drug - Neurological								0
carbamazepine glucuronide*	0.0531415	0.457372	0.701112	Xenobiotics	Drug - Neurological								0
pregabalin	-0.00215949	0.474903	0.718971	Xenobiotics	Drug - Neurological								0
2-propyl-4-pentenoate (4-ene-valproate)	-0.032533	0.484202	0.724299	Xenobiotics	Drug - Neurological								0
3-hydroxyvalproate	-0.0264613	0.511931	0.732079	Xenobiotics	Drug - Neurological								0
valproate (2-propylpentanoate)	-0.0333859	0.543406	0.754827	Xenobiotics	Drug - Neurological								0
2-propyl-2-pentenoate (2-ene-valproate)	-0.0231904	0.631076	0.801754	Xenobiotics	Drug - Neurological								0
carbamazepine 10,11-epoxide*	0.0293155	0.676821	0.82535	Xenobiotics	Drug - Neurological								0
levetiracetam	-0.0272925	0.701396	0.833784	Xenobiotics	Drug - Neurological								0
homoveratric acid	-0.00126582	0.902979	0.94431	Xenobiotics	Drug - Neurological								0
carbamazepine	-0.0146263	0.904042	0.94431	Xenobiotics	Drug - Neurological								0
S-carboxymethyl-L-cysteine	-0.195434	0.0158878	0.117714	Xenobiotics	Drug - Other								0
fosfomycin	-0.0993383	0.11102	0.319347	Xenobiotics	Drug - Other								0
1-hydroxy-2-naphthalenecarboxylate	-0.0135704	0.87651	0.932782	Xenobiotics	Drug - Other								0
paroxetine	0.0581537	0.0602803	0.225016	Xenobiotics	Drug - Psychoactive								0
fluoxetine	0.104753	0.0808532	0.271734	Xenobiotics	Drug - Psychoactive								0
quetiapine	-0.112403	0.114571	0.323846	Xenobiotics	Drug - Psychoactive								0
escitalopram	0.123919	0.124881	0.334614	Xenobiotics	Drug - Psychoactive								0
venlafaxine	-0.0188401	0.173197	0.412133	Xenobiotics	Drug - Psychoactive								0
O-desmethylvenlafaxine	-0.0310692	0.175728	0.413721	Xenobiotics	Drug - Psychoactive								0
trazadone	0.0716317	0.347403	0.612654	Xenobiotics	Drug - Psychoactive								0
cetirizine	0.0663101	0.341718	0.612087	Xenobiotics	Drug - Respiratory								0
pseudoephedrine	-0.0170335	0.432014	0.673521	Xenobiotics	Drug - Respiratory								0
salicylate	0.13673	0.256316	0.519333	Xenobiotics	Drug - Topical Agents								0
hydroquinone sulfate	0.0168269	0.835458	0.907252	Xenobiotics	Drug - Topical Agents								0
leukotriene B4	-0.0162521	0.806359	0.893594	Lipid	Eicosanoid								0
N-palmitoylserine	-0.112673	0.050238	0.203028	Lipid	Endocannabinoid								0
arachidonoyl ethanolamide	0.071075	0.15886	0.391347	Lipid	Endocannabinoid								0
linoleoyl ethanolamide	0.0762841	0.208724	0.456768	Lipid	Endocannabinoid								0
N-stearoyltaurine	-0.0664743	0.233809	0.488015	Lipid	Endocannabinoid								0
N-oleoylserine	-0.0281644	0.557899	0.763112	Lipid	Endocannabinoid								0
N-oleoyltaurine	0.0204783	0.746571	0.856356	Lipid	Endocannabinoid								0
estrone 3-sulfate	-0.0601351	0.259073	0.520246	Lipid	Estrogenic Steroids								0
docosahexaenoylcholine	-0.0664368	0.295911	0.562166	Lipid	Fatty Acid Metabolism (Acyl Choline)								0
stearoylcholine*	-0.071376	0.303192	0.566854	Lipid	Fatty Acid Metabolism (Acyl Choline)								0
oleoylcholine	-0.0619915	0.341506	0.612087	Lipid	Fatty Acid Metabolism (Acyl Choline)								0
linoleoylcholine*	-0.0625958	0.351759	0.616119	Lipid	Fatty Acid Metabolism (Acyl Choline)								0
dihomo-linolenoyl-choline	-0.0587421	0.384135	0.6454	Lipid	Fatty Acid Metabolism (Acyl Choline)								0
palmitoylcholine	-0.0505213	0.442996	0.68444	Lipid	Fatty Acid Metabolism (Acyl Choline)								0
arachidonoylcholine	-0.0312806	0.646749	0.802691	Lipid	Fatty Acid Metabolism (Acyl Choline)								0
hexanoylglutamine	-0.0609206	0.426499	0.668521	Lipid	Fatty Acid Metabolism (Acyl Glutamine)								0
N-palmitoylglycine	0.0685467	0.139797	0.359751	Lipid	Fatty Acid Metabolism(Acyl Glycine)								0
hexanoylglycine (C6)	0.0921706	0.232921	0.488015	Lipid	Fatty Acid Metabolism(Acyl Glycine)								0
trans-2-hexenoylglycine	0.0658621	0.400599	0.6454	Lipid	Fatty Acid Metabolism(Acyl Glycine)								0
stearamide (18:0)	0.00834367	0.906654	0.94431	Lipid	Fatty Acid, Amide								0
N-acetyl-2-aminooctanoate*	-0.116195	0.130802	0.345743	Lipid	Fatty Acid, Amino								0
2-aminooctanoate	0.0540405	0.437456	0.678023	Lipid	Fatty Acid, Amino								0
2-aminoheptanoate	0.0384041	0.564174	0.769542	Lipid	Fatty Acid, Amino								0
15-methylpalmitate (i17:0)	0.125104	0.0341883	0.164866	Lipid	Fatty Acid, Branched								0
17-methylstearate (i19:0)	0.0687	0.197594	0.441203	Lipid	Fatty Acid, Branched								0
pristanate	-0.0724077	0.313473	0.575652	Lipid	Fatty Acid, Branched								0
2-hydroxyphytanate*	-0.0149533	0.858083	0.922203	Lipid	Fatty Acid, Branched								0
hexadecenedioate (C16:1-DC)*	-0.126237	0.0563928	0.216283	Lipid	Fatty Acid, Dicarboxylate								0
heptenedioate (C7:1-DC)*	-0.12462	0.0827706	0.276279	Lipid	Fatty Acid, Dicarboxylate								0
2-hydroxyadipate	-0.12406	0.0882254	0.283831	Lipid	Fatty Acid, Dicarboxylate								0
maleate	-0.228031	0.0949414	0.294243	Lipid	Fatty Acid, Dicarboxylate								0
hydroxy-CMPF*	-0.150253	0.100243	0.305413	Lipid	Fatty Acid, Dicarboxylate								0
octadecadienedioate (C18:2-DC)*	-0.102014	0.108737	0.316667	Lipid	Fatty Acid, Dicarboxylate								0
3-carboxy-4-methyl-5-pentyl-2-furanpropionate (3-CMPFP)	-0.109463	0.120611	0.329741	Lipid	Fatty Acid, Dicarboxylate								0
suberate (C8-DC)	-0.0855205	0.18722	0.423846	Lipid	Fatty Acid, Dicarboxylate								0
sebacate (C10-DC)	-0.0795069	0.21528	0.463753	Lipid	Fatty Acid, Dicarboxylate								0
tetradecanedioate (C14)	-0.0607352	0.326469	0.593469	Lipid	Fatty Acid, Dicarboxylate								0
dodecenedioate (C12:1-DC)*	-0.0461159	0.503661	0.732079	Lipid	Fatty Acid, Dicarboxylate								0
4-hydroxy-2-oxoglutaric acid	0.0391155	0.579981	0.783365	Lipid	Fatty Acid, Dicarboxylate								0
octadecenedioate (C18:1-DC)*	-0.036971	0.591693	0.789463	Lipid	Fatty Acid, Dicarboxylate								0
3-hydroxyadipate*	-0.0363447	0.599087	0.791766	Lipid	Fatty Acid, Dicarboxylate								0
dodecanedioate (C12)	0.0345927	0.619093	0.801392	Lipid	Fatty Acid, Dicarboxylate								0
adipate	0.0311053	0.644091	0.802691	Lipid	Fatty Acid, Dicarboxylate								0
hexadecanedioate (C16)	-0.0312244	0.651573	0.805611	Lipid	Fatty Acid, Dicarboxylate								0
eicosanodioate (C20-DC)	0.0208487	0.711072	0.83722	Lipid	Fatty Acid, Dicarboxylate								0
octadecanedioate (C18)	-0.0227533	0.750563	0.856535	Lipid	Fatty Acid, Dicarboxylate								0
2-hydroxyglutarate	-0.0135471	0.782628	0.878154	Lipid	Fatty Acid, Dicarboxylate								0
azelate (nonanedioate; C9)	-0.0148368	0.798427	0.890378	Lipid	Fatty Acid, Dicarboxylate								0
dodecadienoate (12:2)*	0.0103978	0.852587	0.919982	Lipid	Fatty Acid, Dicarboxylate								0
docosadioate (C22-DC)	0.00587543	0.919497	0.949663	Lipid	Fatty Acid, Dicarboxylate								0
glutarate (C5-DC)	-0.00492531	0.945374	0.968142	Lipid	Fatty Acid, Dicarboxylate								0
9,10-DiHOME	-0.114584	0.0993766	0.304672	Lipid	Fatty Acid, Dihydroxy								0
12,13-DiHOME	-0.00274374	0.971205	0.983756	Lipid	Fatty Acid, Dihydroxy								0
2-hydroxyoctanoate	-0.116255	0.0477398	0.196464	Lipid	Fatty Acid, Monohydroxy								0
2-hydroxystearate	-0.0814876	0.0859138	0.279149	Lipid	Fatty Acid, Monohydroxy								0
5-hydroxyhexanoate	-0.0979551	0.100792	0.306132	Lipid	Fatty Acid, Monohydroxy								0
2-hydroxynervonate*	-0.0748081	0.122552	0.333862	Lipid	Fatty Acid, Monohydroxy								0
2-hydroxypalmitate	-0.0647327	0.169292	0.405803	Lipid	Fatty Acid, Monohydroxy								0
3-hydroxylaurate	0.0570723	0.368252	0.631613	Lipid	Fatty Acid, Monohydroxy								0
13-HODE + 9-HODE	0.053374	0.375679	0.637871	Lipid	Fatty Acid, Monohydroxy								0
2-hydroxybehenate	-0.0347496	0.477784	0.720573	Lipid	Fatty Acid, Monohydroxy								0
16-hydroxypalmitate	0.035683	0.498674	0.732079	Lipid	Fatty Acid, Monohydroxy								0
3-hydroxyoleate*	0.037222	0.589583	0.788799	Lipid	Fatty Acid, Monohydroxy								0
5-hydroxyvalproate	-0.0238021	0.598957	0.791766	Lipid	Fatty Acid, Monohydroxy								0
3-hydroxydecanoate	0.0343988	0.602487	0.792148	Lipid	Fatty Acid, Monohydroxy								0
3-hydroxyhexanoate	-0.0310995	0.619095	0.801392	Lipid	Fatty Acid, Monohydroxy								0
2-hydroxylaurate	-0.028489	0.620401	0.801392	Lipid	Fatty Acid, Monohydroxy								0
2-hydroxydecanoate	-0.0225279	0.684814	0.827413	Lipid	Fatty Acid, Monohydroxy								0
2-hydroxyarachidate*	0.0191413	0.730557	0.851591	Lipid	Fatty Acid, Monohydroxy								0
3-hydroxymyristate	0.0157664	0.769782	0.866337	Lipid	Fatty Acid, Monohydroxy								0
3-hydroxystearate	0.0106319	0.844421	0.914556	Lipid	Fatty Acid, Monohydroxy								0
3-hydroxyoctanoate	-0.00690584	0.91986	0.949663	Lipid	Fatty Acid, Monohydroxy								0
DSGEGDFXAEGGGVR*	0.0413144	0.542097	0.754154	Peptide	Fibrinogen Cleavage Peptide								0
ADSGEGDFXAEGGGVR*	-0.0154501	0.756103	0.858909	Peptide	Fibrinogen Cleavage Peptide								0
ADpSGEGDFXAEGGGVR*	0.0117867	0.834359	0.907252	Peptide	Fibrinogen Cleavage Peptide								0
2,3-dihydroxyisovalerate	-0.187122	0.0174628	0.118602	Xenobiotics	Food Component/Plant								0
erythritol	-0.146679	0.0202826	0.12605	Xenobiotics	Food Component/Plant								0
indolin-2-one	-0.124265	0.0790285	0.266517	Xenobiotics	Food Component/Plant								0
sulfate of piperine metabolite C18H21NO3 (1)*	-0.141667	0.0835169	0.27705	Xenobiotics	Food Component/Plant								0
stachydrine	-0.206056	0.0880881	0.283831	Xenobiotics	Food Component/Plant								0
tartarate	-0.155301	0.112033	0.320374	Xenobiotics	Food Component/Plant								0
N-acetylalliin	-0.0756764	0.113812	0.32357	Xenobiotics	Food Component/Plant								0
2,8-quinolinediol sulfate	-0.0994971	0.126936	0.338267	Xenobiotics	Food Component/Plant								0
3-hydroxystachydrine*	-0.196597	0.128488	0.340732	Xenobiotics	Food Component/Plant								0
genistein sulfate*	-0.128838	0.148332	0.375826	Xenobiotics	Food Component/Plant								0
daidzein sulfate (2)	-0.106406	0.163277	0.400213	Xenobiotics	Food Component/Plant								0
N-(2-furoyl)glycine	-0.111836	0.199249	0.443885	Xenobiotics	Food Component/Plant								0
1-kestose	-0.0835361	0.264775	0.523131	Xenobiotics	Food Component/Plant								0
glucuronide of piperine metabolite C17H21NO3 (5)*	-0.0692406	0.301323	0.566719	Xenobiotics	Food Component/Plant								0
4-allylphenol sulfate	-0.0950429	0.310487	0.574207	Xenobiotics	Food Component/Plant								0
equol sulfate	0.0482041	0.346159	0.612654	Xenobiotics	Food Component/Plant								0
ergothioneine	-0.087183	0.347672	0.612654	Xenobiotics	Food Component/Plant								0
alliin	-0.0535362	0.350699	0.616119	Xenobiotics	Food Component/Plant								0
thymol sulfate	-0.0827744	0.369973	0.632014	Xenobiotics	Food Component/Plant								0
homostachydrine*	-0.0816837	0.374197	0.637181	Xenobiotics	Food Component/Plant								0
saccharin	-0.0803732	0.386997	0.6454	Xenobiotics	Food Component/Plant								0
pyrraline	0.0629562	0.396828	0.6454	Xenobiotics	Food Component/Plant								0
glucuronide of piperine metabolite C17H21NO3 (3)*	-0.0561556	0.419799	0.662398	Xenobiotics	Food Component/Plant								0
quinate	-0.0879184	0.432486	0.673521	Xenobiotics	Food Component/Plant								0
eugenol sulfate	-0.0537467	0.492666	0.731523	Xenobiotics	Food Component/Plant								0
ferulic acid 4-sulfate	-0.0512214	0.551233	0.759316	Xenobiotics	Food Component/Plant								0
glucuronide of piperine metabolite C17H21NO3 (4)*	-0.0400936	0.573736	0.779324	Xenobiotics	Food Component/Plant								0
sulfate of piperine metabolite C16H19NO3 (3)*	-0.0368133	0.602616	0.792148	Xenobiotics	Food Component/Plant								0
methyl glucopyranoside (alpha + beta)	-0.0535928	0.620156	0.801392	Xenobiotics	Food Component/Plant								0
S-allylcysteine	0.0234988	0.636347	0.801754	Xenobiotics	Food Component/Plant								0
dihydroferulic acid	0.0327096	0.636751	0.801754	Xenobiotics	Food Component/Plant								0
sulfate of piperine metabolite C16H19NO3 (2)*	-0.0266099	0.713803	0.83722	Xenobiotics	Food Component/Plant								0
gluconate	-0.0411503	0.718873	0.840572	Xenobiotics	Food Component/Plant								0
acesulfame	0.0302962	0.758025	0.859037	Xenobiotics	Food Component/Plant								0
4-ethylphenol glucuronide	0.011358	0.83057	0.907252	Xenobiotics	Food Component/Plant								0
phytanate	-0.0123621	0.872807	0.930868	Xenobiotics	Food Component/Plant								0
piperine	-0.0148572	0.884654	0.938126	Xenobiotics	Food Component/Plant								0
cinnamoylglycine	0.0106819	0.918798	0.949663	Xenobiotics	Food Component/Plant								0
naringenin 7-glucuronide	0.0015678	0.958376	0.976345	Xenobiotics	Food Component/Plant								0
umbelliferone sulfate	0	3.78476	3.78476	Xenobiotics	Food Component/Plant								0
mannose	-0.0981258	0.0305179	0.156264	Carbohydrate	Fructose, Mannose and Galactose Metabolism								0
galactonate	-0.0493601	0.501849	0.732079	Carbohydrate	Fructose, Mannose and Galactose Metabolism								0
fructose	0.0252557	0.601521	0.792148	Carbohydrate	Fructose, Mannose and Galactose Metabolism								0
mannitol/sorbitol	-0.0456607	0.664857	0.815847	Carbohydrate	Fructose, Mannose and Galactose Metabolism								0
gamma-glutamylisoleucine*	-0.131438	0.0130706	0.102264	Peptide	Gamma-glutamyl Amino Acid								0
gamma-glutamylglycine	0.139315	0.0142898	0.110043	Peptide	Gamma-glutamyl Amino Acid								0
gamma-glutamylglutamine	0.114004	0.0661136	0.238204	Peptide	Gamma-glutamyl Amino Acid								0
gamma-glutamylcitrulline*	0.120829	0.069071	0.243868	Peptide	Gamma-glutamyl Amino Acid								0
gamma-glutamyl-epsilon-lysine	0.0740674	0.144344	0.369551	Peptide	Gamma-glutamyl Amino Acid								0
gamma-glutamylphenylalanine	-0.0697392	0.174553	0.413349	Peptide	Gamma-glutamyl Amino Acid								0
gamma-glutamylleucine	-0.0600504	0.178178	0.413915	Peptide	Gamma-glutamyl Amino Acid								0
gamma-glutamyltyrosine	-0.0576429	0.300441	0.566148	Peptide	Gamma-glutamyl Amino Acid								0
gamma-glutamyl-2-aminobutyrate	0.0600281	0.353016	0.616119	Peptide	Gamma-glutamyl Amino Acid								0
gamma-glutamylhistidine	-0.0460177	0.353092	0.616119	Peptide	Gamma-glutamyl Amino Acid								0
gamma-glutamylglutamate	0.0651341	0.361678	0.623438	Peptide	Gamma-glutamyl Amino Acid								0
gamma-glutamylthreonine	0.0415396	0.398952	0.6454	Peptide	Gamma-glutamyl Amino Acid								0
gamma-glutamylvaline	-0.0207655	0.679933	0.826721	Peptide	Gamma-glutamyl Amino Acid								0
gamma-glutamylmethionine	0.0190571	0.749657	0.856501	Peptide	Gamma-glutamyl Amino Acid								0
gamma-glutamyltryptophan	0.0159981	0.759193	0.859365	Peptide	Gamma-glutamyl Amino Acid								0
gamma-glutamyl-alpha-lysine	0.00514013	0.916621	0.949663	Peptide	Gamma-glutamyl Amino Acid								0
beta-citrylglutamate	-0.13854	0.0283254	0.149629	Amino Acid	Glutamate Metabolism								0
S-1-pyrroline-5-carboxylate	-0.114743	0.0380623	0.173139	Amino Acid	Glutamate Metabolism								0
carboxyethyl-GABA	-0.100792	0.0470098	0.196464	Amino Acid	Glutamate Metabolism								0
glutamine	0.0606137	0.135501	0.352687	Amino Acid	Glutamate Metabolism								0
N-acetylglutamine	-0.0756243	0.210285	0.457019	Amino Acid	Glutamate Metabolism								0
citramalate	-0.0637567	0.297752	0.562166	Amino Acid	Glutamate Metabolism								0
4-hydroxyglutamate	-0.0482332	0.484347	0.724299	Amino Acid	Glutamate Metabolism								0
N-methyl-GABA	-0.0249368	0.712871	0.83722	Amino Acid	Glutamate Metabolism								0
glutamate	0.00621517	0.902041	0.94431	Amino Acid	Glutamate Metabolism								0
N-acetylglutamate	0.000404611	0.99529	0.998353	Amino Acid	Glutamate Metabolism								0
cysteinylglycine	-0.151544	0.0476236	0.196464	Amino Acid	Glutathione Metabolism								0
2-hydroxybutyrate/2-hydroxyisobutyrate	-0.0798182	0.102492	0.308421	Amino Acid	Glutathione Metabolism								0
cysteine-glutathione disulfide	0.112612	0.181462	0.419551	Amino Acid	Glutathione Metabolism								0
cysteinylglycine disulfide*	-0.0394789	0.398088	0.6454	Amino Acid	Glutathione Metabolism								0
2-aminobutyrate	0.0193613	0.668155	0.816819	Amino Acid	Glutathione Metabolism								0
5-oxoproline	0.00818553	0.831716	0.907252	Amino Acid	Glutathione Metabolism								0
cys-gly, oxidized	-0.00953295	0.891426	0.940469	Amino Acid	Glutathione Metabolism								0
glycerol 3-phosphate	0.1114	0.184065	0.420697	Lipid	Glycerolipid Metabolism								0
glycerophosphoglycerol	-0.0128834	0.850276	0.918862	Lipid	Glycerolipid Metabolism								0
2-methylserine	0.144495	0.0179887	0.119473	Amino Acid	Glycine, Serine and Threonine Metabolism								0
dimethylglycine	-0.107589	0.0461958	0.194356	Amino Acid	Glycine, Serine and Threonine Metabolism								0
N-acetylglycine	0.130567	0.0480557	0.196468	Amino Acid	Glycine, Serine and Threonine Metabolism								0
betaine	-0.070768	0.111821	0.320374	Amino Acid	Glycine, Serine and Threonine Metabolism								0
allo-threonine	-0.0939157	0.167179	0.402713	Amino Acid	Glycine, Serine and Threonine Metabolism								0
sarcosine	-0.0590057	0.253679	0.515795	Amino Acid	Glycine, Serine and Threonine Metabolism								0
serine	0.0402944	0.357234	0.619042	Amino Acid	Glycine, Serine and Threonine Metabolism								0
threonine	0.0242961	0.581747	0.783676	Amino Acid	Glycine, Serine and Threonine Metabolism								0
maltotriose	0.0300137	0.645163	0.802691	Carbohydrate	Glycogen Metabolism								0
maltotetraose	-0.0130876	0.843811	0.914556	Carbohydrate	Glycogen Metabolism								0
maltose	0.0090552	0.899505	0.94431	Carbohydrate	Glycogen Metabolism								0
2,3-diphosphoglycerate	0.0251721	0.108939	0.316667	Carbohydrate	Glycolysis, Gluconeogenesis, and Pyruvate Metabolism								0
glucose	0.0316459	0.347168	0.612654	Carbohydrate	Glycolysis, Gluconeogenesis, and Pyruvate Metabolism								0
lactate	0.0387599	0.353418	0.616119	Carbohydrate	Glycolysis, Gluconeogenesis, and Pyruvate Metabolism								0
pyruvate	0.0370971	0.395921	0.6454	Carbohydrate	Glycolysis, Gluconeogenesis, and Pyruvate Metabolism								0
1,5-anhydroglucitol (1,5-AG)	-0.0385643	0.627652	0.801754	Carbohydrate	Glycolysis, Gluconeogenesis, and Pyruvate Metabolism								0
3-phosphoglycerate	0.0246218	0.70164	0.833784	Carbohydrate	Glycolysis, Gluconeogenesis, and Pyruvate Metabolism								0
glycerate	-0.00576661	0.889168	0.9391	Carbohydrate	Glycolysis, Gluconeogenesis, and Pyruvate Metabolism								0
L-urobilin	-0.208374	0.0566331	0.216356	Cofactors and Vitamins	Hemoglobin and Porphyrin Metabolism								0
D-urobilin	-0.147433	0.0846284	0.27705	Cofactors and Vitamins	Hemoglobin and Porphyrin Metabolism								0
I-urobilinogen	-0.121149	0.176403	0.413721	Cofactors and Vitamins	Hemoglobin and Porphyrin Metabolism								0
bilirubin (E,Z or Z,E)*	-0.0642238	0.260092	0.520246	Cofactors and Vitamins	Hemoglobin and Porphyrin Metabolism								0
bilirubin (E,E)*	0.0680394	0.261477	0.520824	Cofactors and Vitamins	Hemoglobin and Porphyrin Metabolism								0
bilirubin	-0.0706652	0.262632	0.521536	Cofactors and Vitamins	Hemoglobin and Porphyrin Metabolism								0
biliverdin	-0.0481902	0.456181	0.701026	Cofactors and Vitamins	Hemoglobin and Porphyrin Metabolism								0
heme	-0.0134326	0.869929	0.929812	Cofactors and Vitamins	Hemoglobin and Porphyrin Metabolism								0
glycosyl ceramide (d18:1/20:0, d16:1/22:0)*	0.0514236	0.370291	0.632014	Lipid	Hexosylceramides								0
glycosyl-N-(2-hydroxynervonoyl)-sphingosine (d18:1/24:1(2OH))*	0.0276298	0.641092	0.802691	Lipid	Hexosylceramides								0
glycosyl-N-stearoyl-sphingosine (d18:1/18:0)	0.117655	0.0180489	0.119473	Lipid	Hexosylceramides (HCER)								0
glycosyl-N-behenoyl-sphingadienine (d18:2/22:0)*	0.0404564	0.497378	0.732079	Lipid	Hexosylceramides (HCER)								0
glycosyl ceramide (d18:1/23:1, d17:1/24:1)*	0.0425944	0.509395	0.732079	Lipid	Hexosylceramides (HCER)								0
glycosyl-N-palmitoyl-sphingosine (d18:1/16:0)	0.0177203	0.698285	0.833784	Lipid	Hexosylceramides (HCER)								0
glycosyl ceramide (d18:2/24:1, d18:1/24:2)*	0.00322799	0.952169	0.973063	Lipid	Hexosylceramides (HCER)								0
1-methylhistidine	-0.179467	0.0149481	0.114213	Amino Acid	Histidine Metabolism								0
3-methylhistidine	-0.184168	0.0363361	0.169223	Amino Acid	Histidine Metabolism								0
cis-urocanate	0.137796	0.103629	0.309937	Amino Acid	Histidine Metabolism								0
N-acetyl-3-methylhistidine*	-0.135371	0.124554	0.334614	Amino Acid	Histidine Metabolism								0
1-methyl-4-imidazoleacetate	-0.0960574	0.150534	0.378565	Amino Acid	Histidine Metabolism								0
trans-urocanate	0.0935329	0.177021	0.413915	Amino Acid	Histidine Metabolism								0
imidazole propionate	-0.134285	0.21793	0.467976	Amino Acid	Histidine Metabolism								0
N-acetylhistidine	-0.0264309	0.644855	0.802691	Amino Acid	Histidine Metabolism								0
histidine	0.00541972	0.861016	0.92434	Amino Acid	Histidine Metabolism								0
myo-inositol	-0.164383	0.0137173	0.106472	Lipid	Inositol Metabolism								0
acetoacetate	-0.0716433	0.487147	0.727374	Lipid	Ketone Bodies								0
3-hydroxybutyrate (BHBA β-Hydroxybutyric acid)	0.0235498	0.823315	0.903262	Lipid	Ketone Bodies								0
lactosyl-N-behenoyl-sphingosine (d18:1/22:0)*	0.0931874	0.124079	0.334614	Lipid	Lactosylceramides								0
lactosyl-N-nervonoyl-sphingosine (d18:1/24:1)*	0.0121694	0.812865	0.897271	Lipid	Lactosylceramides								0
lactosyl-N-palmitoyl-sphingosine (d18:1/16:0)	-0.0188544	0.688415	0.829825	Lipid	Lactosylceramides (LCER)								0
pentadecanoate (15:0)	0.128646	0.0127653	0.101201	Lipid	Long Chain Fatty Acid								0
myristoleate (14:1n5)	0.143536	0.0288133	0.150042	Lipid	Long Chain Fatty Acid								0
myristate (14:0)	0.125469	0.0438399	0.185608	Lipid	Long Chain Fatty Acid								0
margarate (17:0)	0.10548	0.0544375	0.213015	Lipid	Long Chain Fatty Acid								0
10-heptadecenoate (17:1n7)	0.123428	0.0552616	0.21362	Lipid	Long Chain Fatty Acid								0
10-nonadecenoate (19:1n9)	0.103247	0.0970586	0.299443	Lipid	Long Chain Fatty Acid								0
oleate/vaccenate (18:1)	0.0889439	0.116009	0.325753	Lipid	Long Chain Fatty Acid								0
palmitoleate (16:1n7)	0.098991	0.136111	0.352687	Lipid	Long Chain Fatty Acid								0
palmitate (16:0)	0.0731501	0.178164	0.413915	Lipid	Long Chain Fatty Acid								0
nonadecanoate (19:0)	0.0602175	0.188937	0.426744	Lipid	Long Chain Fatty Acid								0
arachidate (20:0)	0.0362099	0.437298	0.678023	Lipid	Long Chain Fatty Acid								0
stearate (18:0)	0.0297288	0.518278	0.732079	Lipid	Long Chain Fatty Acid								0
eicosenoate (20:1n9 or 1n11)	0.0266617	0.662723	0.815007	Lipid	Long Chain Fatty Acid								0
erucate (22:1n9)	0.00320213	0.954924	0.974684	Lipid	Long Chain Fatty Acid								0
palmitoleoylcarnitine (C16:1)*	0.0190569	0.73883	0.855119	Lipid	Long-chain Acylcarnitine								0
palmitoylcarnitine (C16)	0.0368783	0.514431	0.732079	Lipid	Long-chain Acylcarnitine								0
margaroylcarnitine (C17)*	0.125144	0.0478104	0.196464	Lipid	Long-chain Acylcarnitine								0
3-hydroxyoleoylcarnitine (C18:1-OH)	-0.0028668	0.96496	0.981225	Lipid	Long-chain Acylcarnitine								0
linolenoylcarnitine (C18:3)*	0.0483666	0.41752	0.66213	Lipid	Long-chain Acylcarnitine								0
linoleoylcarnitine (C18:2)*	0.0204142	0.706323	0.836341	Lipid	Long-chain Acylcarnitine								0
octadecanedioylcarnitine (C18-DC)*	-0.159064	0.0352368	0.167289	Lipid	Long-chain Acylcarnitine								0
octadecenedioylcarnitine (C18:1-DC)*	-0.168438	0.0523001	0.207083	Lipid	Long-chain Acylcarnitine								0
oleoylcarnitine (C18)	0.0183815	0.742757	0.856356	Lipid	Long-chain Acylcarnitine								0
stearoylcarnitine (C18)	0.063864	0.260123	0.520246	Lipid	Long-chain Acylcarnitine								0
arachidonoylcarnitine (C20:4)	-0.0133525	0.835429	0.907252	Lipid	Long-chain Acylcarnitine								0
arachidoylcarnitine (C20)*	0.000713477	0.990665	0.99624	Lipid	Long-chain Acylcarnitine								0
dihomo-linolenoylcarnitine (C20:3n3 or 6)*	0.049372	0.428443	0.670262	Lipid	Long-chain Acylcarnitine								0
dihomo-linoleoylcarnitine (C20:2)*	0.039468	0.50887	0.732079	Lipid	Long-chain Acylcarnitine								0
eicosenoylcarnitine (C20:1)*	0.0673732	0.272469	0.535304	Lipid	Long-chain Acylcarnitine								0
adrenoylcarnitine (C22:4)*	-0.00826234	0.90249	0.94431	Lipid	Long-chain Acylcarnitine								0
behenoylcarnitine (C22)*	0.0291673	0.628583	0.801754	Lipid	Long-chain Acylcarnitine								0
docosahexaenoylcarnitine (C22:6)*	-0.0954942	0.156603	0.38774	Lipid	Long-chain Acylcarnitine								0
docosapentaenoylcarnitine (C22:5n3)*	-0.0134114	0.835822	0.907252	Lipid	Long-chain Acylcarnitine								0
lignoceroylcarnitine (C24)*	0.0437883	0.393349	0.6454	Lipid	Long-chain Acylcarnitine								0
nervonoylcarnitine (C24:1)*	-0.0265816	0.659666	0.813561	Lipid	Long-chain Acylcarnitine								0
cerotoylcarnitine (C26)*	-0.017966	0.757035	0.858909	Lipid	Long-chain Acylcarnitine								0
ximenoylcarnitine (C26:1)*	-0.024568	0.682038	0.826721	Lipid	Long-chain Acylcarnitine								0
6-oxopiperidine-2-carboxylate	-0.139198	0.0184312	0.120487	Amino Acid	Lysine Metabolism								0
5-(galactosylhydroxy)-L-lysine	-0.127122	0.0667459	0.238204	Amino Acid	Lysine Metabolism								0
N6-acetyllysine	-0.0593095	0.288927	0.552976	Amino Acid	Lysine Metabolism								0
pipecolate	-0.0649045	0.393275	0.6454	Amino Acid	Lysine Metabolism								0
N,N,N-trimethyl-5-aminovalerate	0.0575802	0.396238	0.6454	Amino Acid	Lysine Metabolism								0
N-acetyl-cadaverine	0.0555487	0.532911	0.744553	Amino Acid	Lysine Metabolism								0
N2-acetyllysine	-0.0341512	0.626623	0.801754	Amino Acid	Lysine Metabolism								0
5-aminovalerate	-0.016406	0.806793	0.893594	Amino Acid	Lysine Metabolism								0
5-hydroxylysine	0.01118	0.827812	0.906607	Amino Acid	Lysine Metabolism								0
lysine	0.0015403	0.96563	0.981225	Amino Acid	Lysine Metabolism								0
1-palmitoyl-GPA (16:0)	0.154414	0.0180798	0.119473	Lipid	Lysophospholipid								0
1-linoleoyl-GPA (18:2)*	0.151102	0.0307587	0.156471	Lipid	Lysophospholipid								0
1-linoleoyl-GPG (18:2)*	-0.097264	0.0375941	0.171808	Lipid	Lysophospholipid								0
1-oleoyl-GPE (18:1)	0.105682	0.0402265	0.179642	Lipid	Lysophospholipid								0
2-stearoyl-GPE (18:0)*	0.110738	0.0415457	0.181118	Lipid	Lysophospholipid								0
1-palmitoyl-GPG (16:0)*	-0.0981968	0.0879088	0.283831	Lipid	Lysophospholipid								0
1-linoleoyl-GPI* (18:2)*	0.0309369	0.552018	0.759316	Lipid	Lysophospholipid								0
1-arachidonoyl-GPI* (20:4)*	0.0213459	0.63689	0.801754	Lipid	Lysophospholipid								0
1-palmitoyl-GPI* (16:0)	0.00818106	0.880947	0.935468	Lipid	Lysophospholipid								0
1-oleoyl-GPI (18:1)*	-0.00332032	0.949101	0.970942	Lipid	Lysophospholipid								0
1-stearoyl-GPI (18:0)	0.000524618	0.991862	0.99624	Lipid	Lysophospholipid								0
1-linoleoyl-GPC (18:2)	0.101738	0.0166052	0.117925	Lipid	Lysophospholipid - Lysophosphatidylcholine								0
1-arachidonoyl-GPC* (20:4)*	0.139176	0.0185915	0.120487	Lipid	Lysophospholipid - Lysophosphatidylcholine								0
2-palmitoyl-GPC* (16:0)*	0.119818	0.02674	0.148793	Lipid	Lysophospholipid - Lysophosphatidylcholine								0
1-stearoyl-GPC (18:0)	0.106463	0.0271425	0.148889	Lipid	Lysophospholipid - Lysophosphatidylcholine								0
1-(1-enyl-palmitoyl)-GPC (P-16:0)*	0.136587	0.0413582	0.181118	Lipid	Lysophospholipid - Lysophosphatidylcholine								0
1-lignoceroyl-GPC (24:0)	0.139364	0.0654607	0.237492	Lipid	Lysophospholipid - Lysophosphatidylcholine								0
1-cerotoyl-GPC (26:0)*	-0.0436846	0.52024	0.732079	Lipid	Lysophospholipid - Lysophosphatidylcholine								0
1-(1-enyl-stearoyl)-GPE (P-18:0)*	0.132815	0.0327184	0.163142	Lipid	Lysoplasmalogen								0
1-(1-enyl-palmitoyl)-GPE (P-16:0)*	0.123453	0.0397292	0.178235	Lipid	Lysoplasmalogen								0
1-(1-enyl-oleoyl)-GPE (P-18:1)*	0.130602	0.0432543	0.184728	Lipid	Lysoplasmalogen								0
laurate (12:0)	0.139622	0.0344665	0.165236	Lipid	Medium Chain Fatty Acid								0
pelargonate (9:0)	-0.113693	0.0475257	0.196464	Lipid	Medium Chain Fatty Acid								0
heptanoate (7:0)	-0.106187	0.0726418	0.251038	Lipid	Medium Chain Fatty Acid								0
5-dodecenoate (12:1n7)	0.0397006	0.565144	0.769792	Lipid	Medium Chain Fatty Acid								0
caprate (10:0)	0.0358292	0.733211	0.852652	Lipid	Medium Chain Fatty Acid								0
caproate (6:0)	0.00971939	0.856377	0.922203	Lipid	Medium Chain Fatty Acid								0
caprylate (8:0)	0.0210334	0.870867	0.929812	Lipid	Medium Chain Fatty Acid								0
10-undecenoate (11:1n1)	-0.00593671	0.931329	0.957217	Lipid	Medium Chain Fatty Acid								0
5-dodecenoylcarnitine (C12:1)	-0.160472	0.0173064	0.118362	Lipid	Medium-chain Acylcarnitine								0
suberoylcarnitine (C8-DC)	-0.195525	0.0235478	0.138734	Lipid	Medium-chain Acylcarnitine								0
laurylcarnitine (C12)	-0.125265	0.0463036	0.194356	Lipid	Medium-chain Acylcarnitine								0
myristoleoylcarnitine (C14:1)*	-0.0754477	0.247637	0.506671	Lipid	Medium-chain Acylcarnitine								0
myristoylcarnitine (C14)	0.00210806	0.971686	0.983756	Lipid	Medium-chain Acylcarnitine								0
taurine	0.122747	0.0267767	0.148793	Amino Acid	Methionine, Cysteine, SAM and Taurine Metabolism								0
cysteine sulfinic acid	-0.0922121	0.0275712	0.148889	Amino Acid	Methionine, Cysteine, SAM and Taurine Metabolism								0
methionine sulfone	0.150526	0.0278297	0.148889	Amino Acid	Methionine, Cysteine, SAM and Taurine Metabolism								0
cystathionine	-0.175092	0.0294672	0.152481	Amino Acid	Methionine, Cysteine, SAM and Taurine Metabolism								0
S-methylcysteine	0.124109	0.0362731	0.169223	Amino Acid	Methionine, Cysteine, SAM and Taurine Metabolism								0
N-acetyltaurine	-0.113538	0.0746379	0.254443	Amino Acid	Methionine, Cysteine, SAM and Taurine Metabolism								0
N-methyltaurine	-0.0777978	0.104253	0.310336	Amino Acid	Methionine, Cysteine, SAM and Taurine Metabolism								0
methionine sulfoxide	-0.0979004	0.135624	0.352687	Amino Acid	Methionine, Cysteine, SAM and Taurine Metabolism								0
S-methylcysteine sulfoxide	0.113479	0.136107	0.352687	Amino Acid	Methionine, Cysteine, SAM and Taurine Metabolism								0
N-formylmethionine	-0.0728365	0.137021	0.353578	Amino Acid	Methionine, Cysteine, SAM and Taurine Metabolism								0
alpha-ketobutyrate	-0.0684058	0.206356	0.456598	Amino Acid	Methionine, Cysteine, SAM and Taurine Metabolism								0
cysteine s-sulfate	-0.0785959	0.236276	0.489572	Amino Acid	Methionine, Cysteine, SAM and Taurine Metabolism								0
S-methylmethionine	0.0644224	0.297027	0.562166	Amino Acid	Methionine, Cysteine, SAM and Taurine Metabolism								0
methionine	-0.0559727	0.303713	0.566854	Amino Acid	Methionine, Cysteine, SAM and Taurine Metabolism								0
cystine	-0.0423595	0.498273	0.732079	Amino Acid	Methionine, Cysteine, SAM and Taurine Metabolism								0
hypotaurine	0.0457363	0.499537	0.732079	Amino Acid	Methionine, Cysteine, SAM and Taurine Metabolism								0
N-acetylmethionine	-0.0407882	0.529285	0.741605	Amino Acid	Methionine, Cysteine, SAM and Taurine Metabolism								0
3-sulfo-L-alanine	0.0114393	0.853194	0.919982	Amino Acid	Methionine, Cysteine, SAM and Taurine Metabolism								0
3-hydroxy-3-methylglutarate	-0.10233	0.112975	0.322127	Lipid	Mevalonate Metabolism								0
1-linolenoylglycerol (18:3)	0.0854676	0.234028	0.488015	Lipid	Monoacylglycerol								0
1-linoleoylglycerol (18:2)	0.0704511	0.335945	0.605268	Lipid	Monoacylglycerol								0
1-dihomo-linolenylglycerol (20:3)	0.0646463	0.353192	0.616119	Lipid	Monoacylglycerol								0
2-linoleoylglycerol (18:2)	0.0671793	0.355893	0.619042	Lipid	Monoacylglycerol								0
1-oleoylglycerol (18:1)	0.0567209	0.461554	0.703708	Lipid	Monoacylglycerol								0
1-docosahexaenoylglycerol (22:6)	0.0343418	0.639035	0.802691	Lipid	Monoacylglycerol								0
1-dihomo-linoleoylglycerol (20:2)	0.023039	0.709898	0.83722	Lipid	Monoacylglycerol								0
1-myristoylglycerol (14:0)	-0.0220578	0.740506	0.856046	Lipid	Monoacylglycerol								0
1-palmitoleoylglycerol (16:1)*	0.0188869	0.799798	0.890891	Lipid	Monoacylglycerol								0
2-oleoylglycerol (18:1)	-0.0154856	0.835503	0.907252	Lipid	Monoacylglycerol								0
1-palmitoylglycerol (16:0)	0.00668925	0.92691	0.95423	Lipid	Monoacylglycerol								0
N1-Methyl-2-pyridone-5-carboxamide	-0.164485	0.0210384	0.129406	Cofactors and Vitamins	Nicotinate and Nicotinamide Metabolism								0
quinolinate	-0.20936	0.032862	0.163142	Cofactors and Vitamins	Nicotinate and Nicotinamide Metabolism								0
nicotinamide riboside	-0.106653	0.109117	0.316667	Cofactors and Vitamins	Nicotinate and Nicotinamide Metabolism								0
1-methylnicotinamide	-0.081813	0.240902	0.496004	Cofactors and Vitamins	Nicotinate and Nicotinamide Metabolism								0
trigonelline (N'-methylnicotinate)	-0.0914864	0.417724	0.66213	Cofactors and Vitamins	Nicotinate and Nicotinamide Metabolism								0
nicotinamide	-0.0274821	0.643587	0.802691	Cofactors and Vitamins	Nicotinate and Nicotinamide Metabolism								0
phosphate	-0.0366639	0.278793	0.539919	Energy	Oxidative Phosphorylation								0
pantothenate (Vitamin B5)	-0.0313038	0.589213	0.788799	Cofactors and Vitamins	Pantothenate and CoA Metabolism								0
glycine conjugate of C10H14O2 (1)*	-0.165369	0.027382	0.148889	Partially Characterized Molecules	Partially Characterized Molecules								0
glucuronide of C14H22O4 (2)*	-0.152857	0.0276293	0.148889	Partially Characterized Molecules	Partially Characterized Molecules								0
glucuronide of C8H16O2 (1)*	-0.269151	0.123036	0.334248	Partially Characterized Molecules	Partially Characterized Molecules								0
glucuronide of C10H18O2 (8)*	-0.0750524	0.185581	0.42209	Partially Characterized Molecules	Partially Characterized Molecules								0
glucuronide of C10H18O2 (7)*	-0.108064	0.200616	0.445915	Partially Characterized Molecules	Partially Characterized Molecules								0
glucuronide of C10H18O2 (1)*	-0.0591596	0.228226	0.482084	Partially Characterized Molecules	Partially Characterized Molecules								0
glucuronide of C8H14O2 (3)*	-0.0886061	0.447047	0.688522	Partially Characterized Molecules	Partially Characterized Molecules								0
glucuronide of C19H28O4 (1)*	0.0193531	0.507991	0.732079	Partially Characterized Molecules	Partially Characterized Molecules								0
arabitol/xylitol	-0.132795	0.033588	0.164444	Carbohydrate	Pentose Metabolism								0
ribulonate/xylulonate*	-0.123447	0.0429904	0.184406	Carbohydrate	Pentose Metabolism								0
arabonate/xylonate	-0.104148	0.0924432	0.291643	Carbohydrate	Pentose Metabolism								0
xylose	-0.0933629	0.110902	0.319347	Carbohydrate	Pentose Metabolism								0
ribitol	-0.0681149	0.136315	0.352687	Carbohydrate	Pentose Metabolism								0
arabinose	-0.0805743	0.153325	0.382088	Carbohydrate	Pentose Metabolism								0
ribonate (ribonolactone)	-0.0619258	0.231192	0.487297	Carbohydrate	Pentose Metabolism								0
phenyllactate (PLA)	-0.122306	0.0486712	0.197512	Amino Acid	Phenylalanine Metabolism								0
phenylalanine	-0.0624673	0.104397	0.310336	Amino Acid	Phenylalanine Metabolism								0
phenylpyruvate	-0.0343958	0.511389	0.732079	Amino Acid	Phenylalanine Metabolism								0
4-hydroxyphenylacetate	-0.0537271	0.548134	0.757169	Amino Acid	Phenylalanine Metabolism								0
phenylacetate	-0.044559	0.607395	0.79629	Amino Acid	Phenylalanine Metabolism								0
1-palmitoyl-2-arachidonoyl-GPC (16:0/20:4n6)	0.0730735	0.0746679	0.254443	Lipid	Phosphatidylcholine								0
1-stearoyl-2-arachidonoyl-GPC (18:0/20:4)	0.063833	0.120703	0.329741	Lipid	Phosphatidylcholine								0
1,2-dipalmitoyl-GPC (16:0/16:0)	-0.0422635	0.236046	0.489572	Lipid	Phosphatidylcholine								0
1-linoleoyl-2-linolenoyl-GPC (18:2/18:3)*	0.0769378	0.313725	0.575652	Lipid	Phosphatidylcholine								0
1-palmitoyl-2-oleoyl-GPC (16:0/18:1)	0.0342079	0.322483	0.587316	Lipid	Phosphatidylcholine								0
1-myristoyl-2-palmitoyl-GPC (14:0/16:0)	0.0533421	0.376437	0.638051	Lipid	Phosphatidylcholine								0
1-palmitoyl-2-linoleoyl-GPC (16:0/18:2)	0.0276906	0.386306	0.6454	Lipid	Phosphatidylcholine								0
1-palmitoyl-2-palmitoleoyl-GPC (16:0/16:1)*	0.0265617	0.616043	0.801392	Lipid	Phosphatidylcholine								0
1-palmitoyl-2-docosahexaenoyl-GPC (16:0/22:6)	0.0218382	0.634147	0.801754	Lipid	Phosphatidylcholine								0
1-stearoyl-2-oleoyl-GPC (18:0/18:1)	0.0148037	0.748446	0.856356	Lipid	Phosphatidylcholine								0
1-stearoyl-2-docosahexaenoyl-GPC (18:0/22:6)	-0.00513075	0.920147	0.949663	Lipid	Phosphatidylcholine								0
1,2-dilinoleoyl-GPC (18:2/18:2)	0.0756958	0.163762	0.400374	Lipid	Phosphatidylcholine (PC)								0
1-oleoyl-2-docosahexaenoyl-GPC (18:1/22:6)*	-0.0180032	0.682488	0.826721	Lipid	Phosphatidylcholine (PC)								0
1-palmitoyl-2-stearoyl-GPC (16:0/18:0)	0.00649616	0.865069	0.926657	Lipid	Phosphatidylcholine (PC)								0
1-stearoyl-2-linoleoyl-GPC (18:0/18:2)*	0.00274748	0.93177	0.957217	Lipid	Phosphatidylcholine (PC)								0
1-stearoyl-2-arachidonoyl-GPE (18:0/20:4)	0.0616949	0.272578	0.535304	Lipid	Phosphatidylethanolamine								0
1-stearoyl-2-docosahexaenoyl-GPE (18:0/22:6)*	0.0449309	0.425172	0.668518	Lipid	Phosphatidylethanolamine								0
1-palmitoyl-2-oleoyl-GPE (16:0/18:1)	-0.0207723	0.747407	0.856356	Lipid	Phosphatidylethanolamine								0
1-palmitoyl-2-stearoyl-GPE (16:0/18:0)*	-0.010749	0.864117	0.926652	Lipid	Phosphatidylethanolamine								0
1,2-dipalmitoyl-GPE (16:0/16:0)*	-0.0060201	0.914839	0.949663	Lipid	Phosphatidylethanolamine								0
1-stearoyl-2-oleoyl-GPE (18:0/18:1)	0.000673788	0.992165	0.99624	Lipid	Phosphatidylethanolamine								0
1-oleoyl-2-arachidonoyl-GPE (18:1/20:4)*	0.0511332	0.388627	0.6454	Lipid	Phosphatidylethanolamine (PE)								0
1-palmitoyl-2-docosahexaenoyl-GPE (16:0/22:6)*	0.0301888	0.622822	0.801474	Lipid	Phosphatidylethanolamine (PE)								0
1-oleoyl-2-linoleoyl-GPE (18:1/18:2)*	-0.02786	0.643182	0.802691	Lipid	Phosphatidylethanolamine (PE)								0
1-stearoyl-2-linoleoyl-GPE (18:0/18:2)*	0.021884	0.713948	0.83722	Lipid	Phosphatidylethanolamine (PE)								0
1-palmitoyl-2-arachidonoyl-GPE (16:0/20:4)*	0.0210732	0.716553	0.839268	Lipid	Phosphatidylethanolamine (PE)								0
1-oleoyl-2-docosahexaenoyl-GPE (18:1/22:6)*	0.0223976	0.762046	0.861596	Lipid	Phosphatidylethanolamine (PE)								0
1,2-dilinoleoyl-GPE (18:2/18:2)*	-0.0201821	0.76538	0.862375	Lipid	Phosphatidylethanolamine (PE)								0
1-palmitoyl-2-linoleoyl-GPE (16:0/18:2)	-0.00209276	0.973139	0.984209	Lipid	Phosphatidylethanolamine (PE)								0
1-stearoyl-2-arachidonoyl-GPI (18:0/20:4)	0.0618225	0.165401	0.402275	Lipid	Phosphatidylinositol								0
1-palmitoyl-2-arachidonoyl-GPI (16:0/20:4)*	0.0657468	0.182208	0.420281	Lipid	Phosphatidylinositol								0
1-stearoyl-2-linoleoyl-GPI (18:0/18:2)	0.0495054	0.34355	0.612654	Lipid	Phosphatidylinositol								0
1-palmitoyl-2-oleoyl-GPI (16:0/18:1)*	0.0505242	0.402397	0.646215	Lipid	Phosphatidylinositol								0
1-stearoyl-2-oleoyl-GPI (18:0/18:1)*	0.0304338	0.646567	0.802691	Lipid	Phosphatidylinositol								0
1-palmitoyl-2-linoleoyl-GPI (16:0/18:2)	0.0560634	0.33842	0.60841	Lipid	Phosphatidylinositol (PI)								0
1-stearoyl-2-oleoyl-GPS (18:0/18:1)	0.0444545	0.544123	0.754827	Lipid	Phosphatidylserine (PS)								0
choline	-0.10294	0.016927	0.117925	Lipid	Phospholipid Metabolism								0
glycerophosphoethanolamine	0.0857106	0.0655653	0.237492	Lipid	Phospholipid Metabolism								0
trimethylamine N-oxide	-0.115437	0.181374	0.419551	Lipid	Phospholipid Metabolism								0
phosphoethanolamine (PE)	0.0628249	0.269502	0.531396	Lipid	Phospholipid Metabolism								0
glycerophosphorylcholine (GPC)	0.0521035	0.329706	0.598241	Lipid	Phospholipid Metabolism								0
phosphocholine	-0.00120781	0.982541	0.990644	Lipid	Phospholipid Metabolism								0
1-(1-enyl-stearoyl)-2-oleoyl-GPE (P-18:0/18:1)	0.117537	0.0222943	0.134591	Lipid	Plasmalogen								0
1-(1-enyl-palmitoyl)-2-oleoyl-GPE (P-16:0/18:1)*	0.121544	0.0373424	0.171643	Lipid	Plasmalogen								0
1-(1-enyl-stearoyl)-2-arachidonoyl-GPE (P-18:0/20:4)*	0.112767	0.0847014	0.27705	Lipid	Plasmalogen								0
1-(1-enyl-palmitoyl)-2-linoleoyl-GPE (P-16:0/18:2)*	0.111658	0.102863	0.30859	Lipid	Plasmalogen								0
1-(1-enyl-palmitoyl)-2-arachidonoyl-GPE (P-16:0/20:4)*	0.0481876	0.400912	0.6454	Lipid	Plasmalogen								0
1-(1-enyl-palmitoyl)-2-oleoyl-GPC (P-16:0/18:1)*	0.0364007	0.476434	0.720173	Lipid	Plasmalogen								0
1-(1-enyl-palmitoyl)-2-linoleoyl-GPC (P-16:0/18:2)*	0.043731	0.479706	0.721601	Lipid	Plasmalogen								0
1-(1-enyl-palmitoyl)-2-palmitoleoyl-GPC (P-16:0/16:1)*	-0.0215305	0.681033	0.826721	Lipid	Plasmalogen								0
1-(1-enyl-palmitoyl)-2-arachidonoyl-GPC (P-16:0/20:4)*	-0.00934021	0.875967	0.932782	Lipid	Plasmalogen								0
N-acetyl-isoputreanine*	-0.176124	0.0188754	0.120655	Amino Acid	Polyamine Metabolism								0
N1,N12-diacetylspermine	-0.166129	0.0519323	0.206716	Amino Acid	Polyamine Metabolism								0
4-acetamidobutanoate	-0.0560512	0.40123	0.6454	Amino Acid	Polyamine Metabolism								0
spermidine	-0.0259102	0.67848	0.826343	Amino Acid	Polyamine Metabolism								0
N-acetylputrescine	0.00144009	0.979283	0.989399	Amino Acid	Polyamine Metabolism								0
HWESASXX*	0.0994542	0.14493	0.370083	Peptide	Polypeptide								0
HWESASLLR	-0.0206293	0.683017	0.826721	Peptide	Polypeptide								0
linolenate (18:3n3 or 3n6)	0.148639	0.0190267	0.120736	Lipid	Polyunsaturated Fatty Acid (n3 and n6)								0
linoleate (18:2n6)	0.111056	0.0602771	0.225016	Lipid	Polyunsaturated Fatty Acid (n3 and n6)								0
hexadecadienoate (16:2n6)	0.0832392	0.209702	0.456768	Lipid	Polyunsaturated Fatty Acid (n3 and n6)								0
dihomolinolenate (20:3n3 or 3n6)	0.0657809	0.233215	0.488015	Lipid	Polyunsaturated Fatty Acid (n3 and n6)								0
arachidonate (20:4n6)	0.0590161	0.314695	0.576351	Lipid	Polyunsaturated Fatty Acid (n3 and n6)								0
dihomolinoleate (20:2n6)	0.0407356	0.478171	0.720573	Lipid	Polyunsaturated Fatty Acid (n3 and n6)								0
eicosapentaenoate (EPA; 20:5n3)	-0.0518321	0.492918	0.731523	Lipid	Polyunsaturated Fatty Acid (n3 and n6)								0
docosapentaenoate (DPA; 22:5n3)	0.0421608	0.505509	0.732079	Lipid	Polyunsaturated Fatty Acid (n3 and n6)								0
adrenate (22:4n6)	0.0296748	0.63103	0.801754	Lipid	Polyunsaturated Fatty Acid (n3 and n6)								0
docosahexaenoate (DHA; 22:6n3)	-0.0151975	0.809259	0.895311	Lipid	Polyunsaturated Fatty Acid (n3 and n6)								0
docosadienoate (22:2n6)	-0.0127558	0.816382	0.899518	Lipid	Polyunsaturated Fatty Acid (n3 and n6)								0
docosatrienoate (22:3n3)	0.0142965	0.820992	0.902169	Lipid	Polyunsaturated Fatty Acid (n3 and n6)								0
docosapentaenoate (n6 DPA; 22:5n6)	0.0118612	0.832522	0.907252	Lipid	Polyunsaturated Fatty Acid (n3 and n6)								0
stearidonate (18:4n3)	0.0165845	0.850214	0.918862	Lipid	Polyunsaturated Fatty Acid (n3 and n6)								0
docosatrienoate (22:3n6)*	-0.00832293	0.906399	0.94431	Lipid	Polyunsaturated Fatty Acid (n3 and n6)								0
17alpha-hydroxypregnenolone 3-sulfate	0.0836438	0.117431	0.326961	Lipid	Pregnenolone Steroids								0
pregnenediol sulfate (C21H34O5S)*	-0.065321	0.395861	0.6454	Lipid	Pregnenolone Steroids								0
21-hydroxypregnenolone disulfate	-0.0607195	0.405145	0.649561	Lipid	Pregnenolone Steroids								0
21-hydroxypregnanolone disulfate	-0.0400997	0.444181	0.685188	Lipid	Pregnenolone Steroids								0
pregnenolone sulfate	-0.0240114	0.748655	0.856356	Lipid	Pregnenolone Steroids								0
glycocholate glucuronide (1)	-0.181741	0.0186028	0.120487	Lipid	Primary Bile Acid Metabolism								0
glycochenodeoxycholate	-0.217001	0.0250824	0.144297	Lipid	Primary Bile Acid Metabolism								0
taurochenodeoxycholate	-0.256024	0.0316009	0.158491	Lipid	Primary Bile Acid Metabolism								0
glycocholate	-0.179608	0.0572185	0.217742	Lipid	Primary Bile Acid Metabolism								0
glycocholate sulfate	-0.154884	0.0716147	0.248366	Lipid	Primary Bile Acid Metabolism								0
taurocholate	-0.18434	0.10711	0.315523	Lipid	Primary Bile Acid Metabolism								0
chenodeoxycholate	0.123882	0.168659	0.405278	Lipid	Primary Bile Acid Metabolism								0
cholate	0.100508	0.331186	0.599815	Lipid	Primary Bile Acid Metabolism								0
glyco-alpha-muricholate	-0.0699531	0.407505	0.651368	Lipid	Primary Bile Acid Metabolism								0
tauro-beta-muricholate	-0.0741389	0.512532	0.732079	Lipid	Primary Bile Acid Metabolism								0
glyco-beta-muricholate	-0.040184	0.701257	0.833784	Lipid	Primary Bile Acid Metabolism								0
pregnanolone/allopregnanolone sulfate	0.14514	0.0267748	0.148793	Lipid	Progestin Steroids								0
5alpha-pregnan-3beta,20alpha-diol monosulfate (2)	0.173783	0.0429773	0.184406	Lipid	Progestin Steroids								0
5alpha-pregnan-3beta,20beta-diol monosulfate (1)	0.130035	0.140148	0.359751	Lipid	Progestin Steroids								0
5alpha-pregnan-3beta,20alpha-diol disulfate	-0.101711	0.274108	0.53564	Lipid	Progestin Steroids								0
5alpha-pregnan-diol disulfate	-0.109996	0.286993	0.550832	Lipid	Progestin Steroids								0
pregnanediol-3-glucuronide	0.0325434	0.712983	0.83722	Lipid	Progestin Steroids								0
adenine	-0.146101	0.0231718	0.138183	Nucleotide	Purine Metabolism								0
7-methylguanine	-0.103917	0.0369425	0.171231	Nucleotide	Purine Metabolism								0
xanthine	-0.100152	0.0898127	0.285185	Nucleotide	Purine Metabolism								0
1-methyladenosine	-0.0695902	0.0975065	0.299878	Nucleotide	Purine Metabolism								0
N6-succinyladenosine	-0.116187	0.128558	0.340732	Nucleotide	Purine Metabolism								0
N6-methyladenosine	-0.0251979	0.634747	0.801754	Nucleotide	Purine Metabolism								0
hypoxanthine	-0.00528179	0.93725	0.961837	Nucleotide	Purine Metabolism								0
urate	-0.122932	0.0217977	0.132411	Nucleotide	Purine Metabolism, (Hypo)Xanthine/Inosine containing								0
inosine	-0.107156	0.412308	0.656738	Nucleotide	Purine Metabolism, (Hypo)Xanthine/Inosine containing								0
inosine 5'-monophosphate (IMP)	0.0231905	0.756406	0.858909	Nucleotide	Purine Metabolism, (Hypo)Xanthine/Inosine containing								0
AMP	0.0451313	0.459335	0.701921	Nucleotide	Purine Metabolism, Adenine containing								0
ADP	0.0520918	0.506826	0.732079	Nucleotide	Purine Metabolism, Adenine containing								0
guanosine	-0.0587077	0.347312	0.612654	Nucleotide	Purine Metabolism, Guanine containing								0
pseudouridine	-0.124503	0.0170601	0.117925	Nucleotide	Pyrimidine Metabolism								0
2'-O-methyluridine	-0.135497	0.0195254	0.122409	Nucleotide	Pyrimidine Metabolism								0
N-acetyl-beta-alanine	-0.118443	0.0258651	0.14622	Nucleotide	Pyrimidine Metabolism								0
orotate	-0.177219	0.0346673	0.165388	Nucleotide	Pyrimidine Metabolism								0
3-ureidopropionate	-0.14673	0.0610611	0.227064	Nucleotide	Pyrimidine Metabolism								0
cytidine	-0.106071	0.106292	0.314059	Nucleotide	Pyrimidine Metabolism								0
5,6-dihydrouridine	-0.0921611	0.109085	0.316667	Nucleotide	Pyrimidine Metabolism								0
uridine	0.0713433	0.119307	0.328684	Nucleotide	Pyrimidine Metabolism								0
5,6-dihydrothymine	-0.0660997	0.212908	0.459701	Nucleotide	Pyrimidine Metabolism								0
5,6-dihydrouracil	-0.049362	0.390149	0.6454	Nucleotide	Pyrimidine Metabolism								0
uracil	-0.0288131	0.586242	0.786482	Nucleotide	Pyrimidine Metabolism								0
beta-alanine	0.0184758	0.701097	0.833784	Nucleotide	Pyrimidine Metabolism								0
3-aminoisobutyrate	-7.12179e-05	0.999158	1.00018	Nucleotide	Pyrimidine Metabolism								0
CMP	0.0100461	0.885369	0.938126	Nucleotide	Pyrimidine Metabolism, Cytidine containing								0
dihydroorotate	-0.147187	0.0310382	0.156471	Nucleotide	Pyrimidine Metabolism, Orotate containing								0
2'-deoxyuridine	-0.0487633	0.399153	0.6454	Nucleotide	Pyrimidine Metabolism, Uracil containing								0
5-methyluridine (ribothymidine)	0.0169725	0.710128	0.83722	Nucleotide	Pyrimidine Metabolism, Uracil containing								0
riboflavin (Vitamin B2)	-0.0502954	0.429023	0.670262	Cofactors and Vitamins	Riboflavin Metabolism								0
taurolithocholate 3-sulfate	-0.282736	0.0167499	0.117925	Lipid	Secondary Bile Acid Metabolism								0
glycohyocholate	-0.196437	0.0519961	0.206716	Lipid	Secondary Bile Acid Metabolism								0
taurodeoxycholate	-0.138914	0.17178	0.410761	Lipid	Secondary Bile Acid Metabolism								0
hyocholate	0.126506	0.174395	0.413349	Lipid	Secondary Bile Acid Metabolism								0
ursodeoxycholate	0.111269	0.259202	0.520246	Lipid	Secondary Bile Acid Metabolism								0
7-ketodeoxycholate	0.0784695	0.417328	0.66213	Lipid	Secondary Bile Acid Metabolism								0
isoursodeoxycholate	0.0850554	0.419925	0.662398	Lipid	Secondary Bile Acid Metabolism								0
glycoursodeoxycholate	-0.0622543	0.541484	0.754154	Lipid	Secondary Bile Acid Metabolism								0
tauroursodeoxycholate	-0.0598106	0.569105	0.774109	Lipid	Secondary Bile Acid Metabolism								0
glycodeoxycholate	-0.050684	0.600322	0.792148	Lipid	Secondary Bile Acid Metabolism								0
glycolithocholate	-0.0319984	0.721456	0.841986	Lipid	Secondary Bile Acid Metabolism								0
taurolithocholate	-0.0263892	0.736663	0.854167	Lipid	Secondary Bile Acid Metabolism								0
deoxycholate	-0.028809	0.743676	0.856356	Lipid	Secondary Bile Acid Metabolism								0
3b-hydroxy-5-cholenoic acid	0.017624	0.805131	0.893594	Lipid	Secondary Bile Acid Metabolism								0
acetylcarnitine (C2)	-0.130448	0.0412349	0.181118	Lipid	Short-chain Acylcarnitine								0
adipoylcarnitine (C6-DC)	-0.158944	0.0580704	0.219277	Lipid	Short-chain Acylcarnitine								0
isobutyrylcarnitine (C4)	-0.157764	0.08135	0.272467	Amino Acid	Short-chain Acylcarnitine								0
hexanoylcarnitine (C6)	-0.1256	0.0844904	0.27705	Lipid	Short-chain Acylcarnitine								0
3-hydroxybutyrylcarnitine (C3-DC)	-0.0979446	0.177505	0.413915	Lipid	Short-chain Acylcarnitine								0
3-methylglutarylcarnitine (C6-DC)	-0.0389317	0.631832	0.801754	Amino Acid	Short-chain Acylcarnitine								0
butyrylcarnitine (C4)	-0.00719352	0.918964	0.949663	Lipid	Short-chain Acylcarnitine								0
3-hydroxybutyrylcarnitine (C4-OH)	-0.00783691	0.93894	0.962561	Lipid	Short-chain Acylcarnitine								0
sphingadienine	0.115183	0.109506	0.316855	Lipid	Sphingolipid Synthesis								0
sphinganine-1-phosphate	0.0592705	0.282108	0.54526	Lipid	Sphingolipid Synthesis								0
sphinganine	0.0617295	0.310589	0.574207	Lipid	Sphingolipid Synthesis								0
tricosanoyl sphingomyelin (d18:1/23:0)*	0.132426	0.0203639	0.12605	Lipid	Sphingomyelins								0
sphingomyelin (d18:2/16:0, d18:1/16:1)*	0.100306	0.0250771	0.144297	Lipid	Sphingomyelins								0
sphingomyelin (d18:1/20:1, d18:2/20:0)*	0.120886	0.0278717	0.148889	Lipid	Sphingomyelins								0
sphingomyelin (d18:1/20:0, d16:1/22:0)*	0.103934	0.0416683	0.181118	Lipid	Sphingomyelins								0
palmitoyl sphingomyelin (d18:1/16:0)	0.0681069	0.0505861	0.203593	Lipid	Sphingomyelins								0
stearoyl sphingomyelin (d18:1/18:0)	0.100328	0.0515102	0.206463	Lipid	Sphingomyelins								0
behenoyl sphingomyelin (d18:1/22:0)*	0.0894232	0.0546694	0.213015	Lipid	Sphingomyelins								0
sphingomyelin (d18:1/22:1, d18:2/22:0, d16:1/24:1)*	0.0902436	0.0578353	0.219236	Lipid	Sphingomyelins								0
sphingomyelin (d18:1/25:0, d19:0/24:1, d20:1/23:0, d19:1/24:0)*	0.108859	0.0669796	0.238204	Lipid	Sphingomyelins								0
sphingomyelin (d18:1/20:2, d18:2/20:1, d16:1/22:2)*	0.0811276	0.151066	0.378565	Lipid	Sphingomyelins								0
sphingomyelin (d18:1/22:2, d18:2/22:1, d16:1/24:2)*	0.0665195	0.173031	0.412133	Lipid	Sphingomyelins								0
lignoceroyl sphingomyelin (d18:1/24:0)	0.0644045	0.243878	0.501076	Lipid	Sphingomyelins								0
sphingomyelin (d18:2/24:1, d18:1/24:2)*	0.038934	0.361974	0.623438	Lipid	Sphingomyelins								0
sphingomyelin (d18:2/24:2)*	0.0479531	0.388455	0.6454	Lipid	Sphingomyelins								0
sphingomyelin (d18:1/24:1, d18:2/24:0)*	0.026255	0.508522	0.732079	Lipid	Sphingomyelins								0
sphingosine 1-phosphate	0.0629208	0.184109	0.420697	Lipid	Sphingosines								0
sphingosine	0.0453024	0.516048	0.732079	Lipid	Sphingosines								0
3beta,7alpha-dihydroxy-5-cholestenoate	-0.143298	0.0337568	0.164444	Lipid	Sterol								0
7-HOCA	-0.107015	0.0627965	0.231755	Lipid	Sterol								0
cholesterol	0.0606931	0.165763	0.402275	Lipid	Sterol								0
4-cholesten-3-one	-0.0630155	0.238017	0.491097	Lipid	Sterol								0
campesterol	0.0434613	0.530405	0.742112	Lipid	Sterol								0
beta-sitosterol	0.00854449	0.918799	0.949663	Lipid	Sterol								0
malate	-0.0789835	0.257362	0.520041	Energy	TCA Cycle								0
fumarate	-0.0702726	0.33228	0.600683	Energy	TCA Cycle								0
citrate	0.0298156	0.517807	0.732079	Energy	TCA Cycle								0
alpha-ketoglutarate	0.0243344	0.636737	0.801754	Energy	TCA Cycle								0
aconitate [cis or trans]	-0.012449	0.811132	0.89637	Energy	TCA Cycle								0
succinate	-0.00115464	0.984641	0.991739	Energy	TCA Cycle								0
thiamin (Vitamin B1)	-0.0532486	0.551688	0.759316	Cofactors and Vitamins	Thiamine Metabolism								0
norcotinine	-0.0426187	0.18301	0.420697	Xenobiotics	Tobacco Metabolite								0
cotinine	-0.100425	0.374621	0.637181	Xenobiotics	Tobacco Metabolite								0
cotinine N-oxide	-0.0335065	0.462663	0.703708	Xenobiotics	Tobacco Metabolite								0
3-hydroxycotinine glucuronide	-0.0305707	0.580716	0.783365	Xenobiotics	Tobacco Metabolite								0
hydroxycotinine	-0.00937921	0.900108	0.94431	Xenobiotics	Tobacco Metabolite								0
gamma-CEHC glucuronide*	-0.203695	0.0342207	0.164866	Cofactors and Vitamins	Tocopherol Metabolism								0
gamma-CEHC sulfate*	-0.130968	0.0630938	0.231977	Cofactors and Vitamins	Tocopherol Metabolism								0
delta-CEHC glucuronide*	-0.0962595	0.133995	0.35199	Cofactors and Vitamins	Tocopherol Metabolism								0
alpha-CEHC glucuronide*	-0.121884	0.218198	0.467976	Cofactors and Vitamins	Tocopherol Metabolism								0
alpha-CEHC sulfate	-0.130767	0.224572	0.477461	Cofactors and Vitamins	Tocopherol Metabolism								0
gamma-tocopherol/beta-tocopherol	0.0637704	0.25648	0.519333	Cofactors and Vitamins	Tocopherol Metabolism								0
alpha-tocopherol	0.0449188	0.297466	0.562166	Cofactors and Vitamins	Tocopherol Metabolism								0
gamma-CEHC	-0.00988396	0.8987	0.94431	Cofactors and Vitamins	Tocopherol Metabolism								0
kynurenine	-0.140143	0.0187656	0.120655	Amino Acid	Tryptophan Metabolism								0
C-glycosyltryptophan	-0.128307	0.0211925	0.129539	Amino Acid	Tryptophan Metabolism								0
indoleacetylglutamine	-0.213036	0.0244053	0.142266	Amino Acid	Tryptophan Metabolism								0
indole-3-carboxylate	-0.139428	0.0302305	0.155608	Amino Acid	Tryptophan Metabolism								0
xanthurenate	-0.13596	0.149647	0.378178	Amino Acid	Tryptophan Metabolism								0
3-indoxyl sulfate	-0.125737	0.192367	0.43349	Amino Acid	Tryptophan Metabolism								0
tryptophan betaine	-0.0760336	0.537172	0.749435	Amino Acid	Tryptophan Metabolism								0
N-acetyltryptophan	-0.1096	0.577859	0.783086	Amino Acid	Tryptophan Metabolism								0
tryptophan	-0.0206394	0.635537	0.801754	Amino Acid	Tryptophan Metabolism								0
serotonin	-0.0392679	0.650882	0.805611	Amino Acid	Tryptophan Metabolism								0
indolepropionate	-0.0258026	0.755381	0.858909	Amino Acid	Tryptophan Metabolism								0
3-hydroxyphenylacetate sulfate	-0.110438	0.0234609	0.138734	Amino Acid	Tyrosine Metabolism								0
3,4-dihydroxyphenylacetate sulfate	-0.106574	0.048213	0.196468	Amino Acid	Tyrosine Metabolism								0
3-methoxytyramine sulfate	-0.177017	0.0643896	0.234974	Amino Acid	Tyrosine Metabolism								0
homovanillate (HVA)	-0.121369	0.0685398	0.242869	Amino Acid	Tyrosine Metabolism								0
vanillactate	-0.239462	0.07087	0.247539	Amino Acid	Tyrosine Metabolism								0
indoxyl glucuronide	-0.144088	0.118546	0.327507	Amino Acid	Tyrosine Metabolism								0
vanillylmandelate (VMA)	-0.106286	0.124722	0.334614	Amino Acid	Tyrosine Metabolism								0
p-cresol glucuronide*	-0.147916	0.147238	0.374024	Amino Acid	Tyrosine Metabolism								0
phenol glucuronide	0.101486	0.151349	0.378565	Amino Acid	Tyrosine Metabolism								0
vanillic alcohol sulfate	-0.125611	0.162525	0.39937	Amino Acid	Tyrosine Metabolism								0
thyroxine	0.074444	0.193224	0.43442	Amino Acid	Tyrosine Metabolism								0
tyrosine	-0.0527992	0.226933	0.480391	Amino Acid	Tyrosine Metabolism								0
phenol sulfate	0.107487	0.250732	0.510867	Amino Acid	Tyrosine Metabolism								0
N-formylphenylalanine	-0.0870007	0.284219	0.548256	Amino Acid	Tyrosine Metabolism								0
gentisate	0.0796671	0.297635	0.562166	Amino Acid	Tyrosine Metabolism								0
dopamine 4-sulfate	-0.0957082	0.313017	0.575652	Amino Acid	Tyrosine Metabolism								0
4-methoxyphenol sulfate	-0.0764305	0.396469	0.6454	Amino Acid	Tyrosine Metabolism								0
5-hydroxymethyl-2-furoic acid	0.0448182	0.505784	0.732079	Amino Acid	Tyrosine Metabolism								0
tyramine O-sulfate	0.0543375	0.597068	0.791766	Amino Acid	Tyrosine Metabolism								0
dopamine 3-O-sulfate	-0.0429797	0.621552	0.801392	Amino Acid	Tyrosine Metabolism								0
3-methoxytyrosine	-0.0513722	0.650021	0.805611	Amino Acid	Tyrosine Metabolism								0
4-hydroxyphenylacetatoylcarnitine	0.0432513	0.685281	0.827413	Amino Acid	Tyrosine Metabolism								0
4-hydroxyphenylpyruvate	-0.0171462	0.782976	0.878154	Amino Acid	Tyrosine Metabolism								0
3-hydroxyproline	-0.0955427	0.0170016	0.117925	Amino Acid	Urea cycle; Arginine and Proline Metabolism								0
dimethylarginine (ADMA + SDMA)	-0.0962709	0.0337968	0.164444	Amino Acid	Urea cycle; Arginine and Proline Metabolism								0
homocitrulline	-0.145094	0.0787035	0.266339	Amino Acid	Urea cycle; Arginine and Proline Metabolism								0
N2,N5-diacetylornithine	-0.157196	0.0850997	0.277425	Amino Acid	Urea cycle; Arginine and Proline Metabolism								0
N-acetylarginine	-0.0703321	0.263434	0.521536	Amino Acid	Urea cycle; Arginine and Proline Metabolism								0
homoarginine	-0.0626094	0.378748	0.639751	Amino Acid	Urea cycle; Arginine and Proline Metabolism								0
citrulline	0.0400898	0.393558	0.6454	Amino Acid	Urea cycle; Arginine and Proline Metabolism								0
N-acetylproline	-0.0564989	0.394502	0.6454	Amino Acid	Urea cycle; Arginine and Proline Metabolism								0
N-methylproline	-0.0750232	0.408271	0.651368	Amino Acid	Urea cycle; Arginine and Proline Metabolism								0
N-delta-acetylornithine	-0.0337447	0.625509	0.801754	Amino Acid	Urea cycle; Arginine and Proline Metabolism								0
hydroxyproline	0.0175525	0.694054	0.833644	Amino Acid	Urea cycle; Arginine and Proline Metabolism								0
N-methylhydroxyproline	-0.0232572	0.737134	0.854167	Amino Acid	Urea cycle; Arginine and Proline Metabolism								0
proline	0.0152798	0.752777	0.858061	Amino Acid	Urea cycle; Arginine and Proline Metabolism								0
arginine	0.0143544	0.763386	0.862114	Amino Acid	Urea cycle; Arginine and Proline Metabolism								0
ornithine	0.0118667	0.779571	0.876345	Amino Acid	Urea cycle; Arginine and Proline Metabolism								0
prolylhydroxyproline	-0.00130566	0.982434	0.990644	Amino Acid	Urea cycle; Arginine and Proline Metabolism								0
beta-cryptoxanthin	0.132861	0.0997335	0.304811	Cofactors and Vitamins	Vitamin A Metabolism								0
carotene diol (3)	0.0943531	0.263193	0.521536	Cofactors and Vitamins	Vitamin A Metabolism								0
carotene diol (2)	0.0824796	0.287244	0.550832	Cofactors and Vitamins	Vitamin A Metabolism								0
retinol (Vitamin A)	-0.0421635	0.505608	0.732079	Cofactors and Vitamins	Vitamin A Metabolism								0
carotene diol (1)	0.0529087	0.51191	0.732079	Cofactors and Vitamins	Vitamin A Metabolism								0
pyridoxal	-0.109863	0.0897353	0.285185	Cofactors and Vitamins	Vitamin B6 Metabolism								0
pyridoxine (Vitamin B6)	-0.0182766	0.261444	0.520824	Cofactors and Vitamins	Vitamin B6 Metabolism								0
1-methylurate	-0.163963	0.0191351	0.120736	Xenobiotics	Xanthine Metabolism								0
1,3-dimethylurate	-0.190055	0.0436649	0.185608	Xenobiotics	Xanthine Metabolism								0
1-methylxanthine	-0.155568	0.0936858	0.292785	Xenobiotics	Xanthine Metabolism								0
7-methylurate	0.107433	0.119733	0.328928	Xenobiotics	Xanthine Metabolism								0
theophylline	-0.126809	0.305739	0.569289	Xenobiotics	Xanthine Metabolism								0
3,7-dimethylurate	-0.0401597	0.491832	0.731523	Xenobiotics	Xanthine Metabolism								0
1,3,7-trimethylurate	-0.0541098	0.518892	0.732079	Xenobiotics	Xanthine Metabolism								0
1,7-dimethylurate	-0.0451843	0.595324	0.791766	Xenobiotics	Xanthine Metabolism								0
7-methylxanthine	-0.0440549	0.621939	0.801392	Xenobiotics	Xanthine Metabolism								0
caffeic acid sulfate	-0.0384722	0.636977	0.801754	Xenobiotics	Xanthine Metabolism								0
paraxanthine	-0.03281	0.666675	0.81603	Xenobiotics	Xanthine Metabolism								0
3-methylxanthine	-0.0243071	0.783916	0.878201	Xenobiotics	Xanthine Metabolism								0
caffeine	0.0178548	0.857777	0.922203	Xenobiotics	Xanthine Metabolism								0
5-acetylamino-6-amino-3-methyluracil	-0.0134256	0.88047	0.935468	Xenobiotics	Xanthine Metabolism								0
theobromine	-0.00475334	0.966176	0.981225	Xenobiotics	Xanthine Metabolism								0
Note: Subanalysis results presented following mixed effects modeling of each of the 983 individual metabolites in a responder cohort of patients who received high dose vitamin D3 intervention and had an increase in 25(OH)D ≥ 7.5 ng/ml from day 0 to day 3. In day 0, 3 and 7 repeated measures data we determined correlations between individual metabolites over time relative to sex (as the exposure) …
