# Supplementary figures and images for: Sex-Specific Catabolic Metabolism Alterations in the Critically Ill following High Dose Vitamin D
Source: MDPI journal article supplement (doi:10.3390/metabo12030207), 2022-02-25

Figure S2: Responder Cohort Short-Chain Acylcarnitines

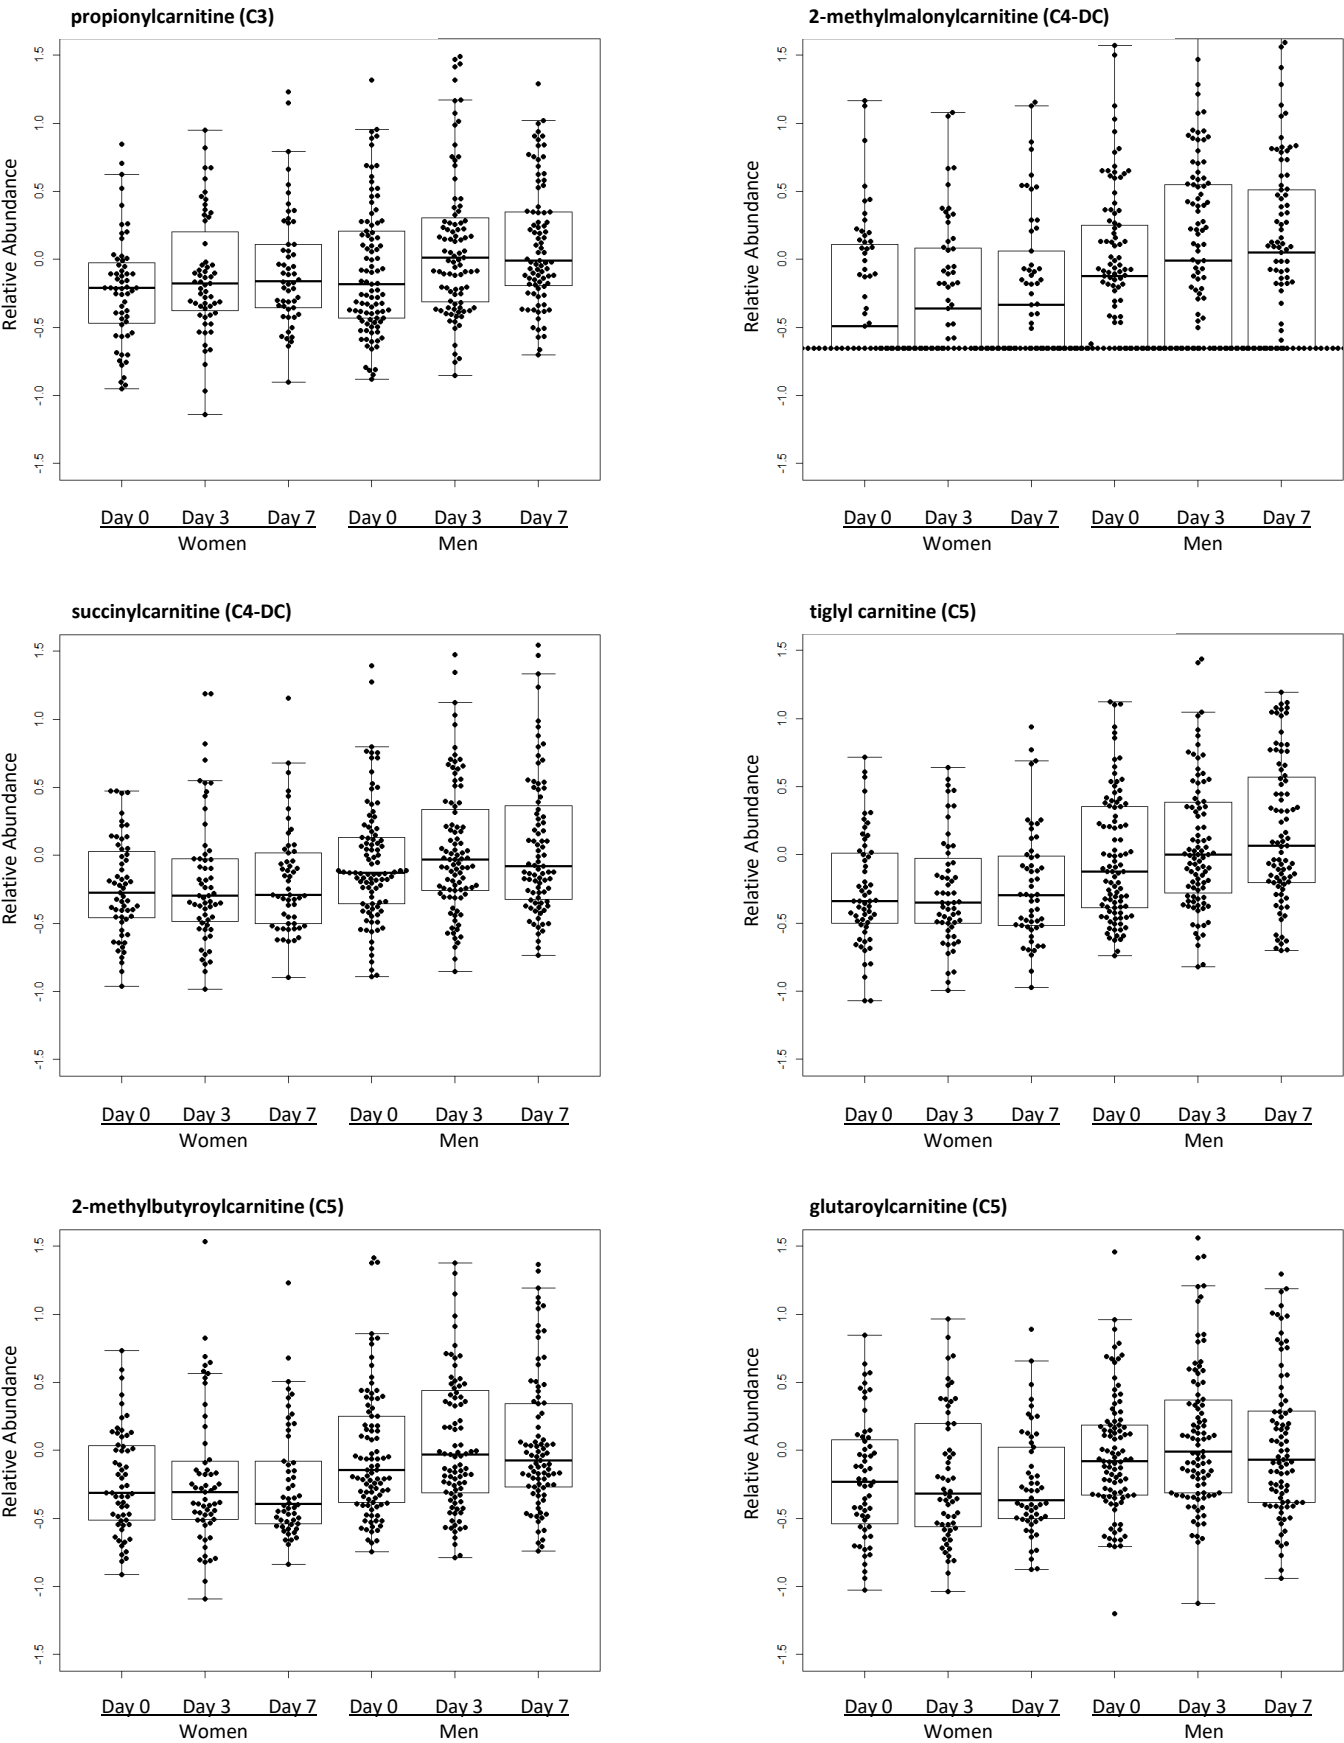

Supplement: s1 [file s1]

Figure S1: Day 0, 3 and 7 serum 25(OH)D levels in Women and Men

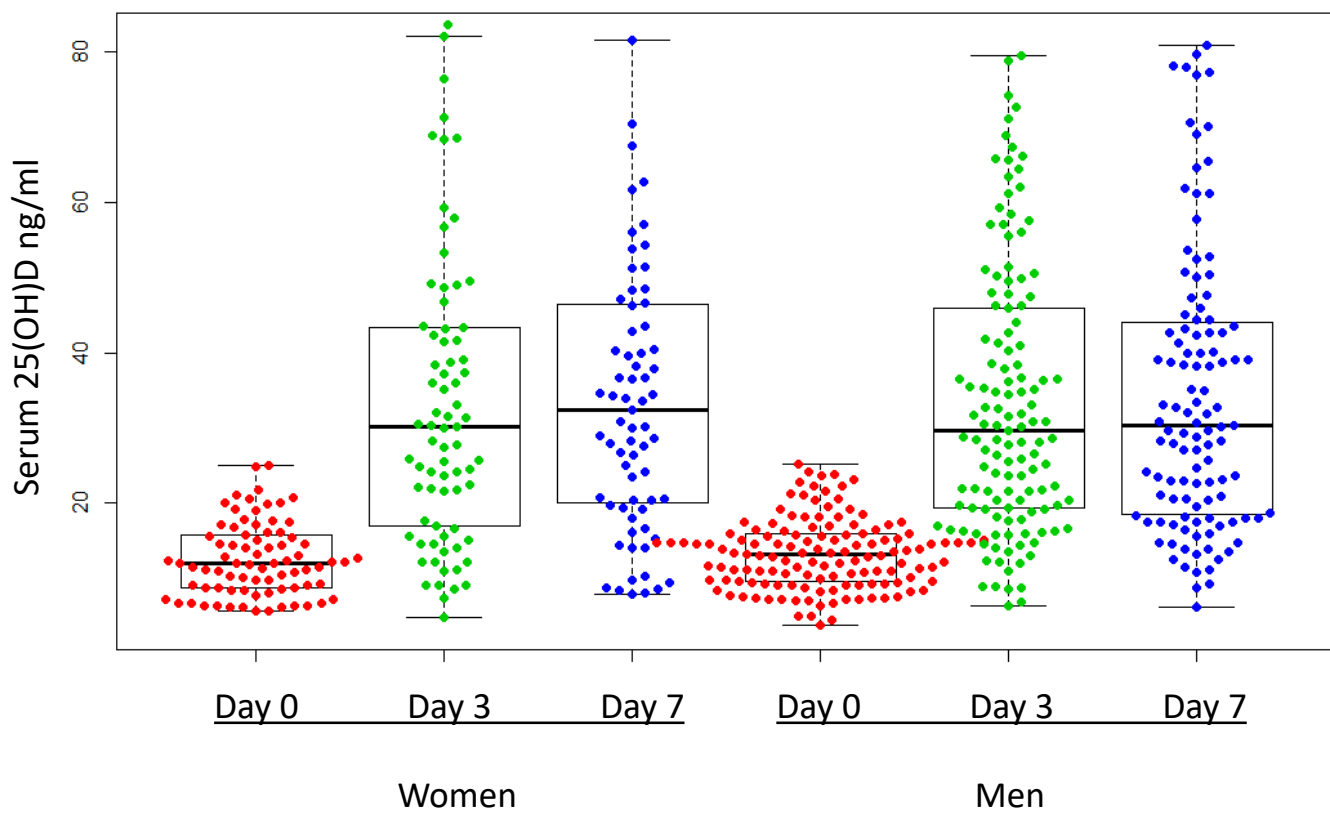

Supplement: s1 [file s1]

Figure S3: Responder Cohort BCAA Metabolites

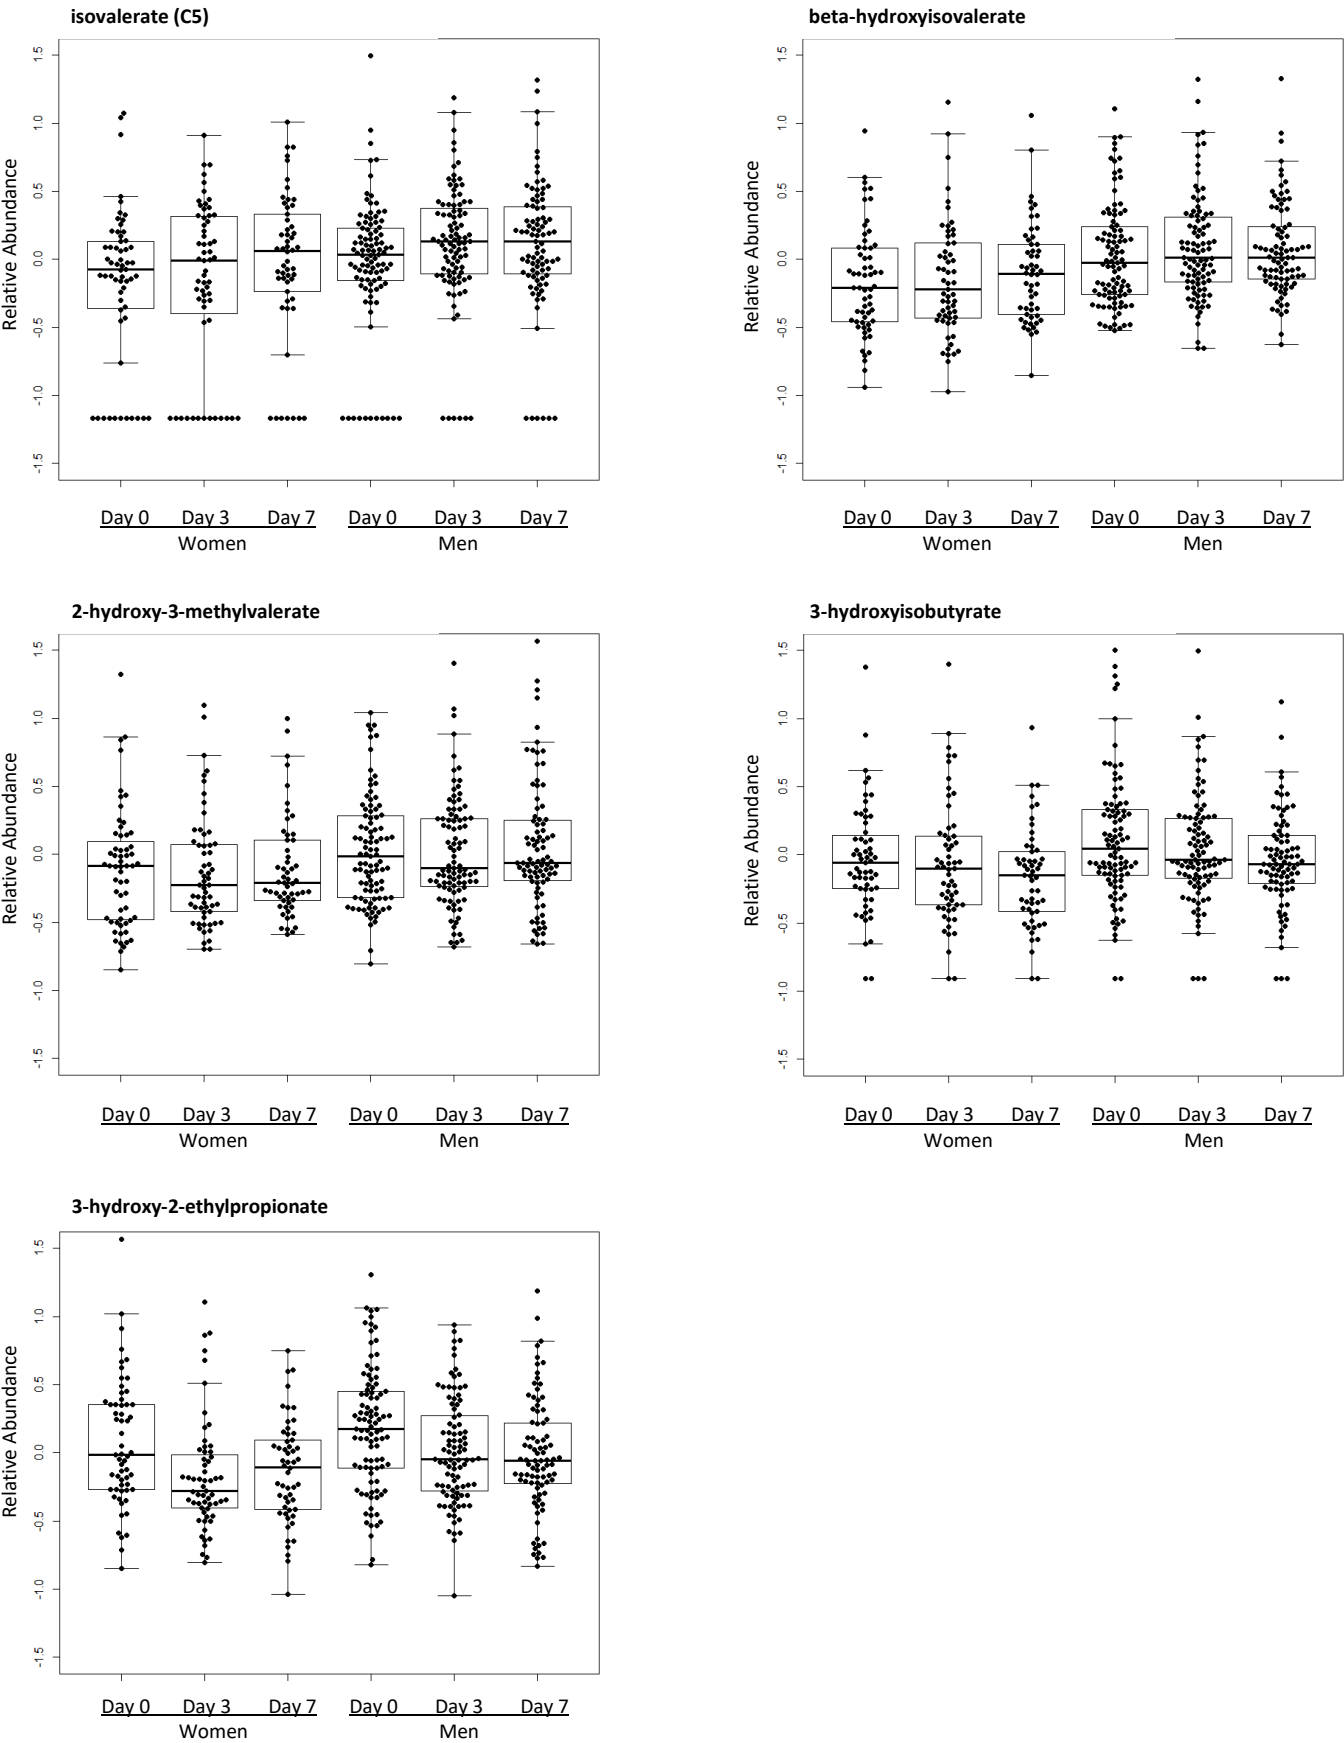

Supplement: s1 [file s1]
